# Supplementary material
Source: publisher figshare collection journal article supplement (https://frontiersin.figshare.com/ndownloader/files/24191516)
Supplement: Supplementary file 1 [file 24191516]

,ID,pvalue,qvalue,meth.diff,Methylationmean,logFC,logCPM,LR,PValue,FDR,cpm_Deci,WGCNA_kME,WGCNA_module,CV_gene,Protein.Name
1,gene1000,0.049015,0.057675,-0.384899,0.675374,0.433433,4.15457,0.232885,0.629393,0.980774,5,0.820086549,turquoise,gene1000,ETS translocation variant 1-like
2,gene10001,0.196275,0.152511,-1.273745,7.33887,0.556546,3.507536,0.783027,0.376217,0.939089,3,0.599316269,black,gene10001,mutS protein homolog 4-like isoform X1
3,gene10005,0.602185,0.375701,1.70162,37.380106,-0.239549,3.537389,0.340055,0.559797,0.974759,3,0.218926415,turquoise,gene10005,GRAM domain-containing protein 1B-like isoform X1
4,gene1001,0.098932,0.089224,3.862241,31.721399,-0.29568,6.036483,0.427428,0.513254,0.964536,9,0.874917302,turquoise,gene1001,LOW QUALITY PROTEIN: diacylglycerol kinase beta-like
5,gene10012,0,0,-13.137455,51.918816,0.346373,3.566974,0.418788,0.517543,0.965262,3,0.44341013,blue,gene10012,LOW QUALITY PROTEIN: porphobilinogen deaminase-like
6,gene10016,0.1762,0.145196,0.827438,2.510133,2.603047,3.897462,12.086667,0.000508,0.142841,4,0.665480416,pink,gene10016,lysosomal thioesterase PPT2-A-like
7,gene10018,0.086454,0.107198,0.073419,0.540844,-0.669191,5.07201,2.188108,0.13908,0.86433,7,0.256413356,green,gene10018,lysosomal thioesterase PPT2-A-like isoform X1
8,gene1002,0.24439,0.205478,-1.933026,36.96549,-0.375989,4.980153,0.88501,0.346833,0.93226,7,0.669030989,brown,gene1002,chromatin accessibility complex protein 1-like isoform X1
9,gene10024,0.302603,0.205393,-3.249429,40.022873,-0.993912,5.424699,10.066962,0.00151,0.273065,8,0.399230782,blue,gene10024,LOW QUALITY PROTEIN: F-box only protein 38-like
10,gene10026,0.032337,0.031807,3.364136,55.108756,-0.694551,4.822434,1.696227,0.192782,0.89842,7,0.486259784,turquoise,gene10026,transcriptional protein SWT1-like isoform X1
11,gene10027,0.079709,0.086823,10.504081,85.710171,-0.205467,4.529848,0.335942,0.562181,0.974759,6,0.55131389,red,gene10027,"endoplasmic reticulum mannosyl-oligosaccharide 1,2-alpha-mannosidase-like isoform X1"
12,gene10028,0.000158,0.000339,-1.48864,49.628172,-0.126504,7.03638,0.252895,0.615044,0.978657,10,0.607415149,brown,gene10028,eukaryotic translation initiation factor 3 subunit G-like
13,gene10029,0.142078,0.117913,-5.206779,77.978989,-0.164802,6.142939,0.397361,0.528455,0.967269,9,0.108980592,turquoise,gene10029,"LOW QUALITY PROTEIN: alpha-1,3-mannosyl-glycoprotein 4-beta-N-acetylglucosaminyltransferase B-like"
14,gene10033,0.154046,0.132906,-1.051474,37.81891,-0.477649,8.125899,2.169994,0.140727,0.86464,10,0.301916964,turquoise,gene10033,uncharacterized protein LOC111122494
15,gene10035,0.173136,0.135671,1.854715,33.753738,0.510901,8.043651,1.27763,0.25834,0.924332,10,0.805898044,turquoise,gene10035,"LOW QUALITY PROTEIN: dynein heavy chain 8, axonemal-like"
16,gene10048,0.258014,0.185997,-0.067645,1.237737,-0.211514,5.128546,0.337535,0.561255,0.974759,7,0.748401457,red,gene10048,frizzled-5-like
17,gene10053,0.217293,0.186303,4.22391,18.415227,-0.437792,5.862216,1.024465,0.311462,0.93226,9,0.587872121,turquoise,gene10053,Krueppel-like factor 6
18,gene10055,0.148361,0.113791,0.422305,39.729929,0.192185,6.423566,0.379439,0.537904,0.96884,9,0.722303361,green,gene10055,uncharacterized protein LOC111122604 isoform X1
19,gene10058,0.130879,0.102628,1.747459,42.30583,-0.091269,4.930335,0.033518,0.854735,0.993016,7,0.774941211,turquoise,gene10058,ubiquitin-conjugating enzyme E2 E1 isoform X1
20,gene10066,0.014448,0.021627,-6.020403,6.525774,0.010233,4.588248,0.000549,0.981301,0.998583,6,0.375506516,brown,gene10066,DNL-type zinc finger protein-like
21,gene10067,0.131207,0.113783,0.067171,28.344971,-0.189284,6.049464,0.160974,0.688261,0.98412,9,0.804468482,turquoise,gene10067,guanylate kinase-like isoform X2
22,gene10069,0.11018,0.090498,-1.002556,71.032887,-0.407956,4.675136,1.343832,0.246359,0.921352,6,0.605549296,green,gene10069,SUN domain-containing ossification factor-like
23,gene10073,0.301643,0.22294,2.701434,21.940832,-0.023223,5.950416,0.003722,0.95135,0.997184,9,0.090667985,turquoise,gene10073,C2 domain-containing protein 2-like isoform X10
24,gene10075,0.432374,0.30944,-2.071593,78.20256,0.560394,3.281259,0.818353,0.365662,0.93611,3,0.257617623,turquoise,gene10075,LOW QUALITY PROTEIN: cytoskeleton-associated protein 2-like
25,gene10076,0.413791,0.268651,-0.790447,20.637706,-0.266264,4.549406,0.680952,0.409259,0.945683,6,0.506611769,turquoise,gene10076,filamin A-interacting protein 1-like isoform X1
26,gene10077,0.012639,0.016018,3.783793,44.498256,-0.158157,4.248965,0.117952,0.731266,0.986801,5,0.407024384,turquoise,gene10077,LOW QUALITY PROTEIN: valine--tRNA ligase-like
27,gene10078,0.439839,0.354112,-0.627713,17.822344,-0.381631,3.439885,0.471045,0.492507,0.959947,3,0.347589049,yellow,gene10078,general transcription factor IIH subunit 4-like
28,gene10082,0,0,-0.2435,42.764163,0.194943,3.67178,0.179055,0.672186,0.983547,4,0.383622096,yellow,gene10082,iduronate 2-sulfatase-like isoform X1
29,gene10083,0.000196,0.000439,-3.419184,66.634348,-0.189091,8.745851,0.509942,0.475164,0.95729,10,0.703865648,yellow,gene10083,CD63 antigen-like
30,gene10085,0.031525,0.034429,-2.717251,49.981419,-0.248325,7.583228,0.677543,0.410434,0.946141,10,0.834805194,blue,gene10085,armadillo repeat-containing protein 4-like isoform X1
31,gene10087,0.473748,0.341097,0.561003,8.416961,-0.212083,4.833744,0.350122,0.554044,0.972661,7,0.397054747,red,gene10087,uncharacterized protein LOC111124862 isoform X1
32,gene10090,0,0,-19.193611,33.070591,-0.531367,8.33251,3.839367,0.050062,0.733083,10,0.67970714,brown,gene10090,protein transport protein Sec61 subunit beta-like
33,gene10092,0.761098,0.511823,-0.22684,17.246318,-0.617293,7.364068,1.445459,0.229258,0.915304,10,0.242382654,blue,gene10092,thioredoxin-like
34,gene10094,0.254363,0.217021,-1.809581,5.69001,0.202692,3.643448,0.165156,0.684454,0.98412,4,0.507156466,green,gene10094,caspase-8-like
35,gene101,0.012211,0.01849,-3.304996,31.978231,0.025506,4.608626,0.003812,0.950768,0.997184,6,0.450774589,brown,gene101,LOW QUALITY PROTEIN: X-ray repair cross-complementing protein 5-like
36,gene10104,0.230074,0.157146,-2.771542,51.334343,-0.058657,5.80353,0.027553,0.868165,0.993796,8,0.694133286,turquoise,gene10104,"dynein beta chain, flagellar outer arm-like"
37,gene10106,0,0,6.935585,68.645896,0.653447,3.26283,1.235271,0.266384,0.925548,3,0.027827582,turquoise,gene10106,G protein pathway suppressor 2-like
38,gene10119,0.414174,0.280671,4.633594,18.020902,-0.226669,4.233782,0.385054,0.534911,0.967596,5,0.2798423,turquoise,gene10119,titin homolog isoform X1
39,gene1012,0.792577,0.524135,0.352754,4.17163,0.750643,4.019861,1.694102,0.193061,0.89842,5,0.317974272,red,gene1012,apoptosis regulator BAX-like isoform X1
40,gene10120,0.001177,0.00236,-3.108769,5.07503,-0.84507,4.320203,0.93835,0.332703,0.93226,5,0.796069524,turquoise,gene10120,N-acetylneuraminate 9-O-acetyltransferase-like isoform X1
41,gene10127,0.013699,0.020442,-0.271208,0.99424,-1.515773,3.719711,3.003691,0.083075,0.811075,4,0.251328173,brown,gene10127,uncharacterized protein LOC111127487
42,gene10140,0.957805,0.582664,0.018442,41.767057,0.001307,3.698028,1.00E-06,0.999161,0.999953,4,0.80319014,turquoise,gene10140,LOW QUALITY PROTEIN: uncharacterized protein LOC111123634
43,gene10143,0.105224,0.107407,15.096361,31.223346,0.251305,3.855731,0.146321,0.702076,0.985024,4,0.75500406,turquoise,gene10143,archaemetzincin-2-like isoform X1
44,gene1015,0.469626,0.3148,7.376956,8.744032,0.34499,4.469902,0.688549,0.406658,0.945588,6,0.444387866,turquoise,gene1015,uncharacterized protein LOC111132096
45,gene10155,5.10E-05,0.000122,-0.183606,1.416008,-0.48161,5.237199,2.895609,0.088821,0.818307,7,0.500638042,red,gene10155,uncharacterized protein LOC111124719 isoform X1
46,gene10156,0.025165,0.032856,-0.100509,50.691132,0.468582,5.184453,1.261312,0.261403,0.925081,7,0.674495109,turquoise,gene10156,"dynein beta chain, flagellar outer arm-like isoform X1"
47,gene10159,0,0,-19.57832,53.301801,-0.46523,4.922767,0.8483,0.357034,0.93226,7,0.521423978,turquoise,gene10159,G protein pathway suppressor 2-like
48,gene10165,0,0,3.988067,15.838744,-0.213539,4.264889,0.212737,0.644631,0.981108,5,0.202837124,turquoise,gene10165,"protein tumorous imaginal discs, mitochondrial-like isoform X1"
49,gene10169,0.033724,0.040871,3.087403,19.471521,-0.970696,4.924955,8.548538,0.003458,0.354677,7,0.428453285,turquoise,gene10169,titin homolog isoform X7
50,gene1017,0.309381,0.27595,-0.480046,2.347391,-0.472972,4.839136,0.270918,0.602717,0.978657,7,0.805256553,turquoise,gene1017,uncharacterized protein LOC111105895
51,gene10170,0.002907,0.005472,1.765254,0.833346,-1.060162,4.073933,4.493533,0.034023,0.675777,5,0.546439689,turquoise,gene10170,N-acetylneuraminate 9-O-acetyltransferase-like isoform X1
52,gene10177,0.019238,0.030051,-0.13621,0.467918,-0.465268,3.960656,0.56059,0.454023,0.956091,4,0.053517512,turquoise,gene10177,uncharacterized protein LOC111126838
53,gene10190,2.50E-05,6.10E-05,-4.901318,19.621579,-0.025506,4.488413,0.00315,0.955242,0.997184,6,0.695029551,turquoise,gene10190,uncharacterized protein LOC111123483 isoform X1
54,gene10194,0.259145,0.223038,4.828823,15.725879,0.610918,4.681944,1.719916,0.189704,0.89842,6,0.463273963,black,gene10194,archaemetzincin-2-like
55,gene10198,0.2495,0.243348,0.435831,1.024782,-0.421889,4.423071,0.746653,0.387538,0.940016,6,0.492418096,brown,gene10198,LOW QUALITY PROTEIN: ribose-5-phosphate isomerase-like
56,gene10203,0.289382,0.270501,0.222262,0.463592,-0.002605,6.407005,0.000114,0.991469,0.999244,9,0.583558446,green,gene10203,zinc finger protein 624-like
57,gene10207,2.60E-05,6.40E-05,-0.92983,76.249531,-0.184734,3.842576,0.174482,0.676158,0.983547,4,0.227251379,turquoise,gene10207,LOW QUALITY PROTEIN: zinc finger protein 493-like
58,gene10210,0.21907,0.218861,-0.005076,2.727806,0.37915,5.617968,1.412465,0.234648,0.916485,8,0.263775239,brown,gene10210,COMM domain-containing protein 5-like
59,gene10211,0,0,-7.277936,17.001215,-0.03843,4.596032,0.010395,0.918792,0.993796,6,0.058853566,turquoise,gene10211,LOW QUALITY PROTEIN: LON peptidase N-terminal domain and RING finger protein 1-like
60,gene10212,0,0,-2.458768,4.667624,-0.003994,6.403022,0.000166,0.989718,0.999244,9,0.720848525,purple,gene10212,uncharacterized protein LOC111124221
61,gene10217,0.700611,0.487349,-0.088097,0.570687,0.033904,4.032184,0.005622,0.940232,0.995246,5,0.104014518,brown,gene10217,uncharacterize lncRNA
62,gene1022,0.408003,0.343332,-0.03109,1.641318,1.138426,4.91641,4.195063,0.040542,0.699822,7,0.520361641,pink,gene1022,LOW QUALITY PROTEIN: uncharacterized protein LOC111116459
63,gene1023,0.39421,0.287993,-0.315059,0.709703,0.137191,4.859583,0.033382,0.855028,0.993016,7,0.606308559,pink,gene1023,uncharacterized protein LOC111118560
64,gene10235,0.283919,0.266856,0.631653,4.485129,-0.622098,3.546969,1.120984,0.289707,0.930457,3,-0.008056369,turquoise,gene10235,probable protein S-acyltransferase 23 isoform X1
65,gene10236,0,0,28.510209,15.078109,-0.635998,6.342327,2.429223,0.119092,0.85134,9,0.720241307,yellow,gene10236,E3 ubiquitin-protein ligase RBX1
66,gene1026,0.000559,0.001176,3.29133,67.931244,0.206351,5.713045,0.537234,0.463581,0.956091,8,0.43324856,green,gene1026,LOW QUALITY PROTEIN: transforming growth factor-beta receptor-associated protein 1-like
67,gene10261,0.314529,0.2462,9.784809,11.656851,0.314964,4.633338,0.136079,0.71221,0.98622,6,0.306987195,turquoise,gene10261,uncharacterized protein LOC111124926
68,gene1027,0.096721,0.090327,2.360689,17.234624,-0.190348,8.317522,1.042968,0.307132,0.93226,10,0.454887188,green,gene1027,LOW QUALITY PROTEIN: Na(+)/H(+) exchange regulatory cofactor NHE-RF2-like
69,gene10285,0.574946,0.430868,-0.22268,0.790934,-0.928714,3.236364,2.746753,0.097452,0.825168,3,0.23811012,blue,gene10285,probable protein S-acyltransferase 23 isoform X1
70,gene10292,0,0,14.857265,15.772497,0.650702,3.624747,1.109194,0.292257,0.930457,4,0.263535185,blue,gene10292,uncharacterized RING finger protein ECU07_0330-like
71,gene10303,0,0,7.319591,33.776052,0.129905,4.381771,0.076872,0.781583,0.988399,6,0.186274686,red,gene10303,leucine-rich repeat-containing protein 59-like
72,gene10310,0.10356,0.087147,7.784463,27.374774,0.199268,6.246615,0.417132,0.518371,0.965262,9,0.304207544,yellow,gene10310,uncharacterized protein LOC111125071 isoform X1
73,gene10322,0.369389,0.284455,-1.201636,38.934705,-0.4855,4.526191,2.07349,0.149878,0.876795,6,0.60549375,turquoise,gene10322,LOW QUALITY PROTEIN: E3 ubiquitin-protein ligase CBL-like
74,gene10327,0.559085,0.391321,-0.44887,1.051837,0.528401,5.007063,1.336972,0.247569,0.921352,7,0.322924308,black,gene10327,uncharacterized protein LOC111125308 isoform X1
75,gene10340,0,0,12.197187,14.286313,-0.282225,4.066799,0.391145,0.531698,0.967269,5,0.685793574,turquoise,gene10340,uncharacterized protein LOC111126902
76,gene10344,0,0,2.416107,13.409643,-0.409319,3.820163,0.914822,0.338838,0.93226,4,0.426041432,brown,gene10344,"28S ribosomal protein S2, mitochondrial-like"
77,gene10358,0.59814,0.426942,-0.085152,0.75876,1.200204,6.209574,5.533412,0.018657,0.57012,9,0.452138853,turquoise,gene10358,uncharacterized protein LOC111124763
78,gene1037,0.018187,0.026093,-1.628314,71.394428,-0.059095,7.203401,0.061001,0.804921,0.991016,10,0.470805203,blue,gene1037,LOW QUALITY PROTEIN: transcriptional activator protein Pur-beta-B-like
79,gene10372,0.276173,0.26175,-2.246984,19.592012,-0.481012,3.982964,0.535672,0.464232,0.956091,5,0.3709492,blue,gene10372,uncharacterized protein LOC111124779
80,gene10393,0.124434,0.092241,-0.811759,44.580697,0.061478,6.037219,0.035402,0.850755,0.993016,9,0.612301893,turquoise,gene10393,epidermal growth factor receptor-like isoform X1
81,gene10398,0.269064,0.197663,4.703795,13.555691,0.004656,6.475145,0.000186,0.989133,0.999244,9,0.68272535,turquoise,gene10398,dipeptidyl peptidase 4-like isoform X1
82,gene10399,0.351517,0.310263,0.34933,0.779101,-0.778393,3.751563,0.986956,0.320487,0.93226,4,0.362590814,magenta,gene10399,acetylcholine receptor subunit beta-like
83,gene1040,0,0,-10.304041,82.580165,-0.11406,7.336665,0.367952,0.544123,0.969301,10,0.666142483,green,gene1040,CCR4-NOT transcription complex subunit 4-like isoform X1
84,gene10409,0.399984,0.33867,-0.040214,0.724851,-0.616848,4.576836,1.643092,0.199902,0.902231,6,0.465990009,red,gene10409,uncharacterized protein LOC111126841
85,gene10412,0.428051,0.296426,-0.300371,18.380477,0.006355,5.012369,0.000178,0.989356,0.999244,7,0.843263584,red,gene10412,protein capicua homolog isoform X1
86,gene10416,0,0,12.923829,54.229799,0.508562,6.800278,2.618865,0.1056,0.83528,10,0.75109524,turquoise,gene10416,"LOW QUALITY PROTEIN: arf-GAP with Rho-GAP domain, ANK repeat and PH domain-containing protein 1-like"
87,gene10417,0,0,-18.346999,33.105108,0.073972,5.067791,0.037199,0.847061,0.992349,7,0.089488225,turquoise,gene10417,F-box only protein 8-like
88,gene10418,0.048721,0.054185,4.339746,30.923294,0.413599,6.146287,2.286771,0.130481,0.861968,9,0.571212716,turquoise,gene10418,E3 ubiquitin-protein ligase MYCBP2-like isoform X1
89,gene10420,0.449368,0.366941,-0.072403,4.412091,-0.436767,7.708557,2.412215,0.120392,0.851857,10,0.179652769,turquoise,gene10420,GRIP and coiled-coil domain-containing protein 2-like isoform X1
90,gene10422,0.277031,0.262291,-0.152895,0.589283,-2.117134,5.446161,5.430586,0.019787,0.572692,8,0.892295907,greenyellow,gene10422,uncharacterized protein LOC111122671
91,gene10425,0.53976,0.410874,-0.062887,3.158242,-0.310077,7.223668,1.552035,0.212835,0.908487,10,0.678525344,turquoise,gene10425,protocadherin gamma-B4-like
92,gene10454,0.100216,0.12067,0.131119,0.189881,-0.774964,6.179939,4.731266,0.029619,0.648676,9,0.316172425,brown,gene10454,uncharacterized protein LOC111126445
93,gene10457,0.257218,0.200567,-17.496625,20.784411,0.104833,4.564056,0.028647,0.865598,0.993796,6,0.305846529,yellow,gene10457,uncharacterized protein LOC111125453 isoform X1
94,gene10460,0,0,-13.142261,5.913178,0.433954,5.401306,0.297621,0.585377,0.977567,8,0.330663035,green,gene10460,"myosin heavy chain, muscle-like isoform X7"
95,gene10461,0,0,21.317387,10.909793,-0.063599,7.584812,0.008308,0.927375,0.993796,10,0.536753866,green,gene10461,nucleoprotein TPR-like
96,gene10462,0.455455,0.370483,-0.400953,2.953384,-1.089742,6.183928,4.479857,0.034297,0.678371,9,0.317353472,turquoise,gene10462,"furin-like protease 1, isoforms 1/1-X/2 isoform X3"
97,gene10466,0.193108,0.201115,1.049311,11.232468,-2.665956,4.886038,8.155364,0.004293,0.379851,7,0.212869449,turquoise,gene10466,heat shock 70 kDa protein 12A-like
98,gene10469,0.715269,0.493591,-0.169401,0.868088,-0.404902,3.453824,0.430051,0.511964,0.964299,3,0.033635078,turquoise,gene10469,uncharacterized protein LOC111123636
99,gene10470,0.521976,0.394812,-0.913911,27.278947,-0.148271,6.446186,0.188817,0.663903,0.982916,9,0.797862036,purple,gene10470,von Willebrand factor A domain-containing protein 3B-like isoform X1
100,gene10475,0.306686,0.281871,0.960336,2.02174,1.259508,4.978901,4.576753,0.032409,0.666821,7,0.629759072,pink,gene10475,5-hydroxyisourate hydrolase-like isoform X1
101,gene10476,0.00043,0.00092,-0.384895,1.132692,0.280628,3.976308,0.073726,0.785986,0.988825,5,0.77031593,red,gene10476,uncharacterized protein LOC111124864 isoform X1
102,gene10489,0.409409,0.344065,-0.161814,0.770962,-0.595517,4.884816,1.97672,0.159736,0.884593,7,0.428065688,turquoise,gene10489,LOW QUALITY PROTEIN: tetraspanin-9-like
103,gene10491,0.042055,0.059147,-3.766538,21.748442,0.087378,6.598207,0.090443,0.763615,0.987969,9,0.771746473,turquoise,gene10491,LOW QUALITY PROTEIN: dual specificity tyrosine-phosphorylation-regulated kinase 1A-like
104,gene10493,0.036805,0.047077,0.129445,68.689283,-0.098425,8.325504,0.114006,0.735629,0.986959,10,0.733954245,blue,gene10493,"LOW QUALITY PROTEIN: ATP synthase subunit g, mitochondrial-like"
105,gene10495,0,0,-1.595674,40.948839,0.216017,6.11145,0.682801,0.408624,0.945594,9,0.262800504,black,gene10495,LOW QUALITY PROTEIN: uncharacterized protein LOC111124243
106,gene10498,0.331001,0.256169,1.652869,30.590049,0.271339,6.299075,0.894252,0.344328,0.93226,9,0.492247656,yellow,gene10498,rab9 effector protein with kelch motifs-like
107,gene105,0,0,-1.129691,1.240806,-0.991221,4.688309,2.5654,0.109225,0.840208,6,0.26335267,black,gene105,interferon-induced protein 44-like isoform X1
108,gene10504,0.090696,0.102229,0.381597,1.11648,0.177793,4.973727,0.072957,0.787079,0.988825,7,0.878790483,turquoise,gene10504,uncharacterize lncRNA
109,gene10506,0.381894,0.328519,-0.767678,5.223415,0.581921,6.216254,1.886359,0.169613,0.888303,9,0.366038787,black,gene10506,LOW QUALITY PROTEIN: uncharacterized protein LOC111124244
110,gene10524,0.212155,0.216106,-1.153731,4.100654,1.520296,3.468134,5.72355,0.016739,0.543871,3,0.561161951,pink,gene10524,uncharacterize lncRNA
111,gene10544,0.757609,0.510517,-0.017941,0.932579,-0.451673,5.131063,0.688483,0.406681,0.945588,7,0.267876984,turquoise,gene10544,uncharacterized protein LOC111127128
112,gene10546,0.23405,0.192353,0.147029,0.346553,0.498945,3.983808,0.53334,0.465206,0.956091,5,0.718138996,turquoise,gene10546,uncharacterized protein LOC111126693 isoform X1
113,gene10564,0,0,8.672777,30.974667,-0.154448,3.158631,0.085066,0.770546,0.987969,2,0.200735383,turquoise,gene10564,rab proteins geranylgeranyltransferase component A 2-like
114,gene10568,0.151503,0.167122,0.206556,0.498801,0.050557,4.356019,0.006552,0.935485,0.99426,5,0.112475855,turquoise,gene10568,"beta-1,3-galactosyltransferase 1-like isoform X2"
115,gene1057,0.002156,0.003787,0.814755,0.925997,0.26843,4.67399,0.39445,0.529969,0.967269,6,0.393623094,brown,gene1057,repressor of yield of DENV protein homolog
116,gene10572,0.000463,0.000942,17.14829,23.094783,2.057708,3.643736,5.822594,0.015822,0.537678,4,0.49219528,turquoise,gene10572,"cGMP-dependent 3\',5\'-cyclic phosphodiesterase-like isoform X5"
117,gene10585,0.479733,0.380408,0.006026,1.347631,-0.25587,3.553106,0.203235,0.652122,0.981108,3,-0.055399769,turquoise,gene10585,"type II inositol 3,4-bisphosphate 4-phosphatase-like isoform X1"
118,gene10593,0.060912,0.080581,2.612864,5.821936,0.315304,3.830685,0.250367,0.616816,0.978657,4,-0.07804345,turquoise,gene10593,monocarboxylate transporter 12-like
119,gene10600,0.170165,0.121418,0.293545,34.975288,0.050894,3.850937,0.01024,0.919396,0.993796,4,0.639287125,green,gene10600,pleckstrin homology-like domain family B member 2 isoform X1
120,gene10604,0.038667,0.042439,2.186914,13.600152,-0.598563,4.333539,1.664222,0.197034,0.900441,5,0.328739014,red,gene10604,myosin-IIIb-like isoform X1
121,gene10627,0.064216,0.084046,-1.006748,5.017188,0.538057,5.092354,1.931229,0.164624,0.886885,7,0.561378706,green,gene10627,inverted formin-2-like isoform X1
122,gene10633,0.299991,0.225524,1.534426,4.155619,0.81591,3.601557,2.931684,0.086857,0.81539,4,0.148962651,turquoise,gene10633,"cGMP-dependent 3\',5\'-cyclic phosphodiesterase-like isoform X6"
123,gene10635,0.188818,0.158822,-0.406678,0.394076,0.331312,3.968479,0.155606,0.693234,0.984124,5,-0.022185115,turquoise,gene10635,heat shock 70 kDa protein 12A-like
124,gene10641,0,0,2.635712,4.660001,-0.011797,4.915946,0.000711,0.978723,0.998341,7,0.134426155,turquoise,gene10641,heat shock 70 kDa protein 12B-like
125,gene10645,0,0,18.323145,19.253219,-0.497637,7.544913,1.050942,0.30529,0.93226,10,0.758940716,yellow,gene10645,uncharacterized protein LOC111124261
126,gene1065,0.208807,0.151902,-0.781041,32.410595,0.213659,4.005777,0.217248,0.641145,0.981108,5,0.440784991,turquoise,gene1065,LOW QUALITY PROTEIN: midasin-like
127,gene10659,0,0,9.280553,35.889945,0.025191,4.052914,0.001559,0.968505,0.998341,5,0.485133698,turquoise,gene10659,Down syndrome cell adhesion molecule homolog isoform X1
128,gene10660,0.122427,0.088699,1.28468,13.30524,-0.579484,5.006705,2.655181,0.103213,0.834573,7,0.454954683,yellow,gene10660,pleckstrin homology-like domain family B member 2 isoform X1
129,gene10679,0.96416,0.584781,-0.003697,0.831377,-0.194208,4.568106,0.09867,0.753432,0.987969,6,0.515941716,turquoise,gene10679,lysosomal thioesterase PPT2-like isoform X1
130,gene10680,0.147957,0.163927,0.121597,0.978424,-0.634617,4.080477,0.566378,0.451702,0.956091,5,0.69297669,turquoise,gene10680,uncharacterized protein LOC111126166 isoform X1
131,gene10684,0.011188,0.015594,-5.580088,56.476071,0.257156,6.184399,0.631424,0.426833,0.951191,9,0.315907633,turquoise,gene10684,sodium bicarbonate cotransporter 3-like isoform X1
132,gene10685,0.000406,0.000834,2.390477,75.075291,0.506915,4.375766,1.08257,0.298123,0.931462,6,0.497490655,turquoise,gene10685,sodium bicarbonate cotransporter 3-like
133,gene10687,0.326086,0.280046,-0.034736,0.337658,0.082511,4.416943,0.026923,0.869666,0.993796,6,0.302176623,black,gene10687,Hermansky-Pudlak syndrome 3 protein homolog isoform X1
134,gene10697,0,0,8.450936,41.663837,-0.314735,3.363489,0.208124,0.648242,0.981108,3,0.214097083,turquoise,gene10697,"prolyl-tRNA synthetase associated domain-containing protein 1-like, partial"
135,gene10699,0.088989,0.078472,-4.190573,23.821979,-0.119593,4.471631,0.071996,0.788453,0.989125,6,0.389796832,blue,gene10699,multidrug resistance-associated protein 7-like
136,gene107,0.10729,0.104948,-0.881515,55.253136,0.008274,7.38335,0.00148,0.969313,0.998341,10,0.465863908,turquoise,gene107,LIM and SH3 domain protein 1-like isoform X5
137,gene10705,0.61705,0.424143,0.467532,9.050225,-0.04636,4.166537,0.005102,0.943054,0.995637,5,0.540078202,turquoise,gene10705,DDB1- and CUL4-associated factor 4-like
138,gene10713,0.179566,0.138432,1.759608,31.471826,-0.012364,3.381268,0.00038,0.984448,0.999054,3,0.622120707,turquoise,gene10713,kinesin-like protein KIF16B isoform X1
139,gene10723,0.14876,0.127034,0.019334,0.417234,0.07,4.655957,0.019806,0.88808,0.993796,6,0.319008494,purple,gene10723,location of vulva defective 1-like isoform X2
140,gene10724,0.309638,0.283762,-0.146924,1.516342,-0.914134,4.625355,4.057907,0.043965,0.711229,6,-0.130084048,turquoise,gene10724,A disintegrin and metalloproteinase with thrombospondin motifs 6-like isoform X1
141,gene10737,0.071622,0.072716,-3.713071,42.628563,0.086718,5.83335,0.073229,0.786692,0.988825,9,0.673910102,turquoise,gene10737,dipeptidyl peptidase 2-like
142,gene10746,0.009997,0.015673,0.54928,2.081878,0.592733,4.79527,0.585968,0.443983,0.954654,7,0.788472134,turquoise,gene10746,von Willebrand factor A domain-containing protein 5A-like isoform X1
143,gene10748,0.038072,0.054256,-0.341598,0.605622,-0.302909,5.995771,1.041812,0.3074,0.93226,9,0.494887659,blue,gene10748,von Willebrand factor A domain-containing protein 5A-like
144,gene10754,0.048024,0.066161,2.874485,65.166248,-0.066653,4.128295,0.026831,0.869888,0.993796,5,0.387498422,yellow,gene10754,cap-specific mRNA (nucleoside-2\'-O-)-methyltransferase 2-like
145,gene10762,0.001163,0.002116,4.748413,34.523243,0.794049,4.271772,0.933896,0.333853,0.93226,5,0.466082543,turquoise,gene10762,sodium/glucose cotransporter 4-like isoform X1
146,gene10766,1.80E-05,4.40E-05,13.735307,52.759336,-1.745269,4.12636,2.794341,0.094598,0.824371,5,0.705492156,turquoise,gene10766,telomerase reverse transcriptase-like isoform X1
147,gene10767,0.279084,0.229536,-0.680971,4.879111,-0.508846,3.789152,0.717072,0.397106,0.943993,4,0.641873203,red,gene10767,epidermal growth factor-like protein 8
148,gene10768,0.028988,0.035009,2.853458,33.875511,-0.171451,5.42202,0.035513,0.850525,0.993016,8,0.864343758,turquoise,gene10768,neurogenic locus notch homolog protein 4-like isoform X1
149,gene10769,0.053983,0.064413,2.793731,15.931032,-0.84795,4.147087,2.231696,0.135205,0.863321,5,0.277586579,turquoise,gene10769,extracellular matrix protein 3-like
150,gene10772,0,0,12.300848,65.041195,-0.056382,3.94573,0.010612,0.917953,0.993796,4,0.394789499,red,gene10772,heat shock 70 kDa protein 12A-like
151,gene10773,0.000491,0.001044,-2.669929,3.873037,-0.803923,5.635699,2.062689,0.150944,0.878894,8,0.158307534,red,gene10773,heat shock 70 kDa protein 12A-like
152,gene1078,0,0,-19.467062,7.469703,0.918823,6.152209,2.958986,0.085402,0.811887,9,0.572108855,pink,gene1078,multimerin-1-like
153,gene10780,0.433544,0.32724,0.514235,3.630822,0.811419,5.104389,2.230325,0.135325,0.863321,7,0.232615115,blue,gene10780,heat shock 70 kDa protein 12A-like isoform X1
154,gene10781,0.006584,0.010734,2.682719,40.569899,0.068502,4.665422,0.014231,0.905044,0.993796,6,0.156753472,red,gene10781,lymphocyte-specific helicase-like
155,gene10783,0.174813,0.154606,-4.088327,6.413358,-0.264183,5.960019,0.434284,0.509895,0.964299,9,0.509307434,brown,gene10783,heat shock 70 kDa protein 12A-like
156,gene1079,0.228608,0.174394,-0.507354,11.310878,0.769079,5.569513,2.857489,0.090949,0.818998,8,0.663809811,red,gene1079,F-actin-methionine sulfoxide oxidase MICAL3-like isoform X1
157,gene10793,1.00E-06,2.00E-06,0.95538,4.217284,-0.667863,5.997512,5.993344,0.01436,0.537211,9,0.07871569,turquoise,gene10793,uncharacterized protein LOC111125388 isoform X1
158,gene10795,0.313587,0.214784,-1.736343,22.694885,-0.239072,5.95256,0.967147,0.325393,0.93226,9,0.492357509,turquoise,gene10795,uncharacterized protein LOC111124280
159,gene10796,0.468895,0.364952,-0.00482,1.199158,-0.201574,5.050904,0.366382,0.544983,0.969301,7,0.402788207,turquoise,gene10796,magnesium transporter NIPA3-like
160,gene10799,0.071373,0.067026,-5.075264,40.910483,0.202476,4.713548,0.177516,0.673517,0.983547,6,0.214582692,turquoise,gene10799,protein ced-11-like isoform X4
161,gene10801,0.000103,0.000238,2.751437,20.651917,-0.193412,4.965515,0.260144,0.610021,0.978657,7,0.723141548,blue,gene10801,progesterone-induced-blocking factor 1-like
162,gene10803,0.166072,0.127108,-0.872381,10.670361,-0.360197,6.676903,1.348898,0.245471,0.920884,9,0.37824962,turquoise,gene10803,uncharacterized protein LOC111126576 isoform X1
163,gene10806,0.000664,0.001382,-4.525731,75.731588,0.240202,7.216537,0.791771,0.373565,0.938627,10,0.658568692,green,gene10806,uncharacterized protein LOC111123833
164,gene10808,0.21953,0.213245,-1.170435,10.409718,0.485451,5.396064,1.113123,0.291404,0.930457,8,0.385783444,brown,gene10808,"2\',3\'-cyclic-nucleotide 3\'-phosphodiesterase-like isoform X1"
165,gene10811,0.169057,0.181558,1.149248,73.244484,0.104413,4.653784,0.062397,0.802747,0.991016,6,0.549204591,turquoise,gene10811,male-specific lethal 3 homolog isoform X1
166,gene10813,0,0,-13.251492,13.003428,0.64504,5.80164,1.018159,0.312956,0.93226,8,0.317547672,red,gene10813,uncharacterized protein LOC111125088
167,gene10814,0.318186,0.22458,1.177072,19.802974,0.13198,7.47419,0.262286,0.608554,0.978657,10,0.676024916,green,gene10814,uncharacterized protein LOC111125312
168,gene10815,0,0,-11.597198,62.390395,0.22461,6.381683,0.715474,0.397632,0.944113,9,0.50322603,turquoise,gene10815,uncharacterized protein LOC111125318
169,gene10817,0,0,1.260476,2.218228,-0.205688,6.029772,0.320042,0.571583,0.976289,9,0.002950102,brown,gene10817,uncharacterized protein LOC111125314
170,gene10828,0.34767,0.30816,-0.506722,6.949543,0.543265,4.18903,1.845322,0.174328,0.891743,5,0.291667302,black,gene10828,protein ABHD18-like
171,gene10830,0.200219,0.206777,1.398061,7.42359,-0.288247,4.188862,0.346839,0.555908,0.973992,5,0.304710505,green,gene10830,protein SDA1 homolog
172,gene10831,0.040317,0.048233,4.952462,36.783709,0.226861,6.443958,0.437102,0.508524,0.963997,9,0.729188867,purple,gene10831,uncharacterized protein LOC111124909 isoform X1
173,gene10834,0.399752,0.263431,2.202214,39.255121,0.120958,7.320882,0.361115,0.547888,0.970295,10,0.625607078,green,gene10834,brain tumor protein-like
174,gene10836,0.326523,0.237799,0.021838,2.343806,-0.18525,6.499316,0.527197,0.467788,0.956091,9,0.521241635,turquoise,gene10836,formin-J-like isoform X1
175,gene10837,0,0,7.421309,24.26091,-0.024496,5.354194,0.00565,0.940081,0.995246,8,0.474344796,blue,gene10837,protein cramped-like
176,gene10838,0.019875,0.030948,5.025889,81.8794,-0.007451,7.664028,0.000762,0.977973,0.998341,10,0.412117059,blue,gene10838,jupiter microtubule associated homolog 1-like isoform X1
177,gene10840,0.117888,0.103971,-1.273967,45.42026,-0.361895,4.303322,0.765388,0.381648,0.93925,5,0.283828999,red,gene10840,syntaxin-binding protein 4-like
178,gene10841,0.067748,0.072132,-2.252136,6.833385,0.840242,4.849656,2.103225,0.146989,0.876049,7,0.718454763,turquoise,gene10841,ubiquitin-like protein 3
179,gene10842,0.727588,0.498115,0.712346,49.571665,-0.091309,5.065709,0.063913,0.800414,0.990433,7,0.539702616,blue,gene10842,ELMO domain-containing protein 2-like isoform X1
180,gene10843,0.066122,0.056102,1.354266,25.522561,-0.39629,6.786334,3.777065,0.05196,0.74151,10,0.543600468,turquoise,gene10843,uncharacterized protein LOC111125783
181,gene10846,0.144653,0.109594,-0.065393,22.116584,-0.030239,5.904196,0.002201,0.962581,0.997796,9,0.799501069,turquoise,gene10846,transient receptor potential-gamma protein-like isoform X1
182,gene10852,0.111592,0.091474,15.35273,26.737545,-0.339274,4.135977,0.619224,0.431336,0.95203,5,0.205233659,turquoise,gene10852,sodium bicarbonate transporter-like protein 11 isoform X1
183,gene10860,0,0,9.070085,78.344798,-0.926785,4.186047,2.037064,0.153506,0.878894,5,0.315760633,turquoise,gene10860,MPN domain-containing protein-like
184,gene10867,0.096732,0.105032,2.742732,28.259106,0.322927,5.568687,0.883634,0.347208,0.93226,8,0.815367431,turquoise,gene10867,golgin subfamily A member 2-like isoform X1
185,gene10868,0.453848,0.282888,2.149653,18.403369,0.151727,5.519699,0.170969,0.679252,0.983547,8,0.63827341,turquoise,gene10868,heterogeneous nuclear ribonucleoprotein L-like
186,gene10869,0.044522,0.052883,-2.466831,5.98175,0.966883,4.801578,1.963826,0.161105,0.884593,7,0.736252992,red,gene10869,uncharacterized protein LOC111123801 isoform X1
187,gene10870,0.035117,0.041873,0.52441,25.246225,-0.652395,6.754643,5.421388,0.019892,0.572925,10,0.32017967,purple,gene10870,cell adhesion molecule-related/down-regulated by oncogenes-like
188,gene10874,0.633612,0.458304,0.176691,1.559649,-0.371905,6.414812,0.306541,0.579811,0.977018,9,0.885307539,turquoise,gene10874,tyrosine-protein kinase transmembrane receptor Ror-like isoform X1
189,gene10875,0.233834,0.188278,0.477959,1.079132,0.166009,4.919787,0.205039,0.650684,0.981108,7,0.25215182,red,gene10875,FMRFamide receptor-like isoform X1
190,gene10877,0.233222,0.225986,0.037191,0.876128,-0.155167,3.141614,0.078816,0.778908,0.988002,2,0.50452619,red,gene10877,uncharacterized protein LOC111126860
191,gene10878,0.262107,0.177914,0.147414,0.357175,-0.262609,4.23206,0.203625,0.651811,0.981108,5,0.308713748,turquoise,gene10878,cardioacceleratory peptide receptor-like
192,gene1088,0.079611,0.091782,-4.790263,22.24738,0.317397,5.155477,0.710129,0.399401,0.944478,7,0.438388096,red,gene1088,LOW QUALITY PROTEIN: uncharacterized protein LOC111125438
193,gene10894,0.014942,0.024018,-0.167654,0.621674,-0.309043,4.024555,0.414436,0.519727,0.965262,5,0.357594953,grey,gene10894,protein Wnt-9a-like
194,gene10896,9.00E-06,2.30E-05,-5.8599,11.282955,-0.590944,3.512148,1.25606,0.262398,0.925081,3,0.329013196,turquoise,gene10896,protein Wnt-6-like
195,gene10897,0.042529,0.055995,-0.252702,0.564638,-0.3635,3.747467,0.468373,0.493737,0.960128,4,0.438148963,magenta,gene10897,protein Wnt-10b-like isoform X1
196,gene10899,0.007555,0.011494,-8.391958,45.7922,-0.317445,4.827428,0.616365,0.432401,0.952222,7,0.059753477,turquoise,gene10899,tubulin polyglutamylase TTLL11-like isoform X1
197,gene1090,0.204661,0.172007,-4.552505,1.242484,-0.903732,3.804657,0.88517,0.34679,0.93226,4,0.169426175,red,gene1090,von Willebrand factor D and EGF domain-containing protein-like isoform X1
198,gene10911,0.350214,0.2493,0.090843,0.463708,-0.06111,4.361401,0.022949,0.879589,0.993796,5,0.646880741,green,gene10911,"beta-1,3-galactosyltransferase 1-like"
199,gene10914,0.844406,0.54324,-0.391046,10.569485,-0.632897,4.071749,1.243688,0.264761,0.925081,5,0.435426298,brown,gene10914,haloacid dehalogenase-like hydrolase domain-containing protein 2 isoform X1
200,gene10917,0.521474,0.40482,-0.085085,0.547668,-0.289738,6.023757,0.497032,0.480807,0.959052,9,0.547393096,blue,gene10917,failed axon connections homolog isoform X1
201,gene10921,0.111561,0.112356,0.982396,15.887205,-0.172839,5.303242,0.281301,0.595849,0.978657,8,0.543592147,red,gene10921,malignant fibrous histiocytoma-amplified sequence 1 homolog
202,gene10944,0.001889,0.003674,-2.711624,3.33584,0.062872,5.863886,0.038545,0.844352,0.992241,9,0.033519904,turquoise,gene10944,heat shock 70 kDa protein 12A-like
203,gene10946,0.020887,0.027469,-3.594683,23.474738,-0.253717,5.770513,0.379687,0.537771,0.96884,8,0.518096029,turquoise,gene10946,CAP-Gly domain-containing linker protein 1-like isoform X6
204,gene10952,0.467298,0.329697,-0.882789,7.111127,-0.203596,4.945553,0.253,0.61497,0.978657,7,0.373280161,red,gene10952,uncharacterized protein LOC111125429 isoform X1
205,gene10953,0.094218,0.075007,-3.623833,53.061777,-0.269563,5.891926,0.759281,0.383554,0.93925,9,0.715510981,purple,gene10953,cytoplasmic dynein 2 heavy chain 1-like isoform X1
206,gene10954,0.276104,0.241665,0.575571,32.613966,0.326055,5.535175,1.4409,0.229994,0.915304,8,0.377384618,blue,gene10954,DCN1-like protein 5
207,gene10956,0.481408,0.32977,0.797496,25.143796,0.035493,5.849085,0.007469,0.93113,0.993796,9,0.776360886,turquoise,gene10956,hemicentin-1-like isoform X1
208,gene10958,0.394165,0.261213,4.429174,45.4728,-0.129798,7.292839,0.170298,0.679847,0.983547,10,0.808099978,blue,gene10958,cilia- and flagella-associated protein 91-like isoform X1
209,gene10959,0,0,-1.24394,65.842637,-0.712113,4.956484,3.843668,0.049934,0.732911,7,0.066853615,turquoise,gene10959,homeobox protein PKNOX2-like isoform X1
210,gene10965,0.259568,0.195958,7.639635,19.671874,0.213249,4.15595,0.198243,0.656143,0.981306,5,0.418232903,red,gene10965,phosphatidylglycerophosphatase and protein-tyrosine phosphatase 1-like
211,gene10967,0.257705,0.244914,-0.236257,4.711669,0.873213,3.622035,1.485921,0.22285,0.911329,4,0.447858273,turquoise,gene10967,peroxisome proliferator-activated receptor delta-like isoform X1
212,gene10973,4.00E-06,1.00E-05,-2.7195,76.135936,0.165909,7.621127,0.285978,0.59281,0.978657,10,0.758179573,blue,gene10973,cilia- and flagella-associated protein 44-like isoform X1
213,gene10976,0,0,-1.377202,90.105516,-0.172381,6.29332,0.484889,0.486216,0.959339,9,0.613747225,green,gene10976,NEDD4-binding protein 2-like
214,gene10977,0.00043,0.000881,-2.282861,34.994738,-0.008144,5.669171,0.00088,0.976333,0.998341,8,0.506527329,green,gene10977,sister chromatid cohesion protein PDS5 homolog B-like
215,gene10978,0.387285,0.331546,-0.568502,4.709976,-0.510388,4.81489,2.064924,0.150722,0.878492,7,0.366694527,turquoise,gene10978,actin-related protein 5-like
216,gene10979,0.301416,0.27838,0.687541,87.801431,-0.11626,5.480398,0.210144,0.646654,0.981108,8,0.299693067,turquoise,gene10979,putative pre-mRNA-splicing factor ATP-dependent RNA helicase DHX16
217,gene10982,0,0,-4.35202,11.278196,-0.914882,3.423846,2.639661,0.104226,0.83528,3,0.366502989,yellow,gene10982,protein-associating with the carboxyl-terminal domain of ezrin-like
218,gene10983,0.118029,0.103916,-2.071816,54.8484,-0.154335,5.482792,0.176655,0.674264,0.983547,8,0.369474804,turquoise,gene10983,protein SMG7-like
219,gene10984,7.60E-05,0.000177,-0.803281,5.146037,0.490522,4.869722,0.753133,0.385486,0.93925,7,0.665498326,turquoise,gene10984,abnormal spindle-like microcephaly-associated protein homolog
220,gene10987,0,0,5.331243,82.293794,0.211226,5.482148,0.640424,0.423557,0.950565,8,0.274972507,yellow,gene10987,ubiquitin carboxyl-terminal hydrolase 25-like isoform X1
221,gene10988,0.258547,0.249559,1.213086,7.376107,0.429025,3.812919,0.667471,0.413935,0.946894,4,0.57175732,pink,gene10988,Golgi pH regulator-like
222,gene10991,0.249848,0.196701,2.763773,72.941527,0.382616,4.776749,1.045931,0.306446,0.93226,6,0.669149164,red,gene10991,uncharacterized protein LOC111126331 isoform X1
223,gene10994,0.004692,0.008491,-2.853856,36.336429,0.21509,2.99327,0.137566,0.710713,0.985947,2,0.353617316,purple,gene10994,palmitoyltransferase ZDHHC3-like
224,gene10996,0.043474,0.060817,-2.433744,5.850978,-0.660759,3.467565,1.078398,0.299056,0.931462,3,0.587069352,turquoise,gene10996,large neutral amino acids transporter small subunit 1-like isoform X1
225,gene110,0.334191,0.265169,0.170585,3.606262,-0.352358,6.254819,0.662164,0.415797,0.948173,9,0.32841831,green,gene110,LOW QUALITY PROTEIN: uncharacterized protein LOC111109754
226,gene11002,1.40E-05,3.50E-05,-1.776217,3.473379,-0.024713,3.995268,0.000852,0.976713,0.998341,5,0.691303795,turquoise,gene11002,protocadherin gamma-A4-like isoform X1
227,gene11005,0.198795,0.205693,0.13738,0.550442,-0.339397,3.728899,0.359933,0.548543,0.970301,4,0.379885182,yellow,gene11005,glycine receptor subunit alpha-3-like
228,gene11017,0.114875,0.114584,-1.475936,14.173605,0.214114,4.540774,0.288939,0.590901,0.978657,6,0.063579867,turquoise,gene11017,uncharacterized protein LOC111126068
229,gene11019,0.038873,0.045792,-2.671667,68.850507,-0.089839,7.250668,0.169306,0.68073,0.983547,10,0.597131766,green,gene11019,tyrosine-protein kinase Tec-like isoform X1
230,gene11022,0.003537,0.00591,10.213226,58.557541,-1.327274,3.51373,4.034524,0.044578,0.716498,3,0.387178088,turquoise,gene11022,ufm1-specific protease 2-like
231,gene11023,0.052724,0.058164,-4.836707,77.216535,0.27901,6.039062,1.044371,0.306807,0.93226,9,0.368682532,blue,gene11023,ubiquitin-conjugating enzyme E2 A isoform X1
232,gene11024,0,0,1.082294,3.049311,-0.313197,6.751018,0.713916,0.398147,0.944148,10,0.350933994,yellow,gene11024,uncharacterize lncRNA
233,gene11027,0.366605,0.319464,-1.348122,8.618901,-0.114105,3.297893,0.041554,0.838472,0.992241,3,0.084878616,turquoise,gene11027,zinc finger protein 570-like
234,gene11032,0.296596,0.25334,0.1562,2.804958,1.292771,3.373111,4.401865,0.0359,0.692537,3,0.279721187,pink,gene11032,uncharacterized protein LOC111123571 isoform X1
235,gene11038,7.60E-05,0.000168,8.658806,45.84471,1.116994,3.78122,3.621583,0.057035,0.757253,4,0.003461848,turquoise,gene11038,protein C10-like
236,gene11039,0.03029,0.037164,12.974608,42.138431,-0.366712,5.75252,0.772506,0.379443,0.939089,8,0.616675765,turquoise,gene11039,ATP-dependent DNA helicase Q5-like
237,gene11041,0,0,8.189822,59.041159,-0.266267,10.762266,0.903497,0.341846,0.93226,10,0.836694492,magenta,gene11041,40S ribosomal protein S19-like
238,gene11043,0,0,3.546237,84.473522,-0.335951,6.606255,1.209407,0.27145,0.928587,9,0.585019771,turquoise,gene11043,serine/threonine-protein kinase SIK3-like isoform X1
239,gene11050,0.2702,0.257696,-0.422487,1.571894,-0.736377,7.966021,2.29908,0.129451,0.860467,10,0.388009187,brown,gene11050,uncharacterize lncRNA
240,gene11051,0.359485,0.315125,-0.289542,1.004074,0.105475,7.271812,0.146515,0.701888,0.985024,10,0.745231301,purple,gene11051,uncharacterized protein LOC111125238 isoform X1
241,gene11058,0.654439,0.4455,0.033922,2.814241,-0.647095,3.848653,1.113065,0.291417,0.930457,4,0.105642987,turquoise,gene11058,acetylcholine receptor subunit beta-type lev-1-like isoform X2
242,gene11066,0,0,-0.821799,3.919088,-0.221153,3.905093,0.136307,0.71198,0.98622,4,0.611993162,red,gene11066,uncharacterized protein LOC111126032
243,gene11070,0.000627,0.001309,-0.502733,1.034749,0.751608,8.807145,3.396219,0.065346,0.772093,10,0.356638332,blue,gene11070,uncharacterized protein LOC111123734 isoform X1
244,gene11072,0.096356,0.117041,0.128606,0.414829,0.226463,5.08347,0.298964,0.584533,0.977236,7,0.361544377,green,gene11072,uncharacterized protein LOC111122640
245,gene11073,0,0,2.860957,80.976114,-0.170907,7.51903,0.220936,0.638328,0.981108,10,0.867958837,blue,gene11073,coiled-coil domain-containing protein 151-like
246,gene11075,0.259485,0.250171,1.482633,69.278418,-0.085547,5.928383,0.070269,0.790946,0.989195,9,0.403417759,brown,gene11075,uncharacterized protein LOC111122643
247,gene11077,0.655033,0.46471,-0.056353,0.633015,-1.380963,3.799016,4.324653,0.037564,0.69394,4,0.05191393,turquoise,gene11077,uncharacterized protein LOC111127518
248,gene11083,0.000234,0.000485,4.808107,36.195653,-0.722288,4.565496,3.092321,0.078663,0.799972,6,0.102104677,turquoise,gene11083,dynactin subunit 1-like isoform X1
249,gene11086,0.45828,0.307517,0.437641,16.898351,0.087846,5.213226,0.067868,0.794467,0.989848,7,0.496069269,green,gene11086,"calcium/calmodulin-dependent 3\',5\'-cyclic nucleotide phosphodiesterase 1A-like isoform X1"
250,gene11093,0.049454,0.067782,-0.608555,8.246373,0.116027,4.413868,0.093809,0.75939,0.987969,6,0.059213381,red,gene11093,prostaglandin E synthase 2-like
251,gene11098,0,0,-6.895179,17.952348,-1.31139,3.835582,3.165898,0.075191,0.787597,4,0.551966753,turquoise,gene11098,calcium channel flower homolog
252,gene11102,0,0,1.405052,6.05088,-1.611997,8.215778,9.552009,0.001997,0.28904,10,0.773931983,greenyellow,gene11102,immediate early response gene 5-like protein
253,gene11103,0.165445,0.135632,0.27635,1.522093,-0.81762,5.217714,2.765233,0.096333,0.825168,7,0.365924344,turquoise,gene11103,protein lev-9-like isoform X1
254,gene11113,0.222089,0.17854,-3.339091,35.680838,-0.814852,5.433475,5.956483,0.014663,0.537211,8,0.108852233,turquoise,gene11113,uncharacterized protein LOC111127124 isoform X1
255,gene11116,0.710031,0.491439,0.346588,8.155716,-2.416967,4.170163,9.580671,0.001966,0.28904,5,0.045342594,turquoise,gene11116,hemicentin-1-like isoform X1
256,gene11118,0.508439,0.397894,0.474015,21.450535,-0.196669,5.45206,0.353501,0.552138,0.971919,8,0.464930506,yellow,gene11118,myotubularin-related protein 2-like
257,gene11120,0.072116,0.073492,4.375971,13.899454,-0.156684,6.303671,0.188292,0.664342,0.982916,9,0.647407229,brown,gene11120,proteasome maturation protein-like
258,gene11122,0.10873,0.117767,8.23351,17.992119,-0.124735,6.634764,0.162368,0.686986,0.98412,9,0.772632023,turquoise,gene11122,"calcium uptake protein 3, mitochondrial-like isoform X1"
259,gene11123,0,0,-1.595172,3.630878,-0.352809,6.559576,1.093058,0.295795,0.931462,9,0.423555698,turquoise,gene11123,uncharacterized protein LOC111126204
260,gene11132,0.072924,0.074502,-7.582902,33.689648,-0.286302,6.324842,0.414734,0.519576,0.965262,9,0.318977375,purple,gene11132,uncharacterized protein LOC111124471 isoform X1
261,gene11135,0.337751,0.302024,3.592501,30.253263,-0.12819,6.169836,0.1344,0.713913,0.98622,9,0.365019845,turquoise,gene11135,uncharacterized protein LOC111124470 isoform X1
262,gene11142,0.077301,0.097938,-0.182783,1.418858,0.04068,4.470826,0.008644,0.925924,0.993796,6,0.465645619,blue,gene11142,receptor-type tyrosine-protein phosphatase kappa-like
263,gene11144,0,0,5.063374,36.389342,-0.647673,4.406844,0.881518,0.347786,0.93226,6,0.636714003,turquoise,gene11144,neuronal calcium sensor 1-like
264,gene11145,0,0,28.943796,41.999277,-0.395439,4.417201,1.014691,0.313782,0.93226,6,0.434783609,blue,gene11145,NF-kappa-B-repressing factor-like
265,gene11152,0,0,27.264865,28.935602,0.048028,5.598665,0.020465,0.886245,0.993796,8,0.319742401,turquoise,gene11152,FK506-binding protein 15-like isoform X1
266,gene11153,1.00E-06,4.00E-06,5.519075,41.655701,0.26687,6.785423,0.729531,0.393035,0.941854,10,0.326938194,green,gene11153,high affinity copper uptake protein 1-like isoform X1
267,gene11155,0,0,-12.163857,48.373086,-0.506326,5.467543,1.78392,0.181669,0.893782,8,0.318476449,turquoise,gene11155,ral guanine nucleotide dissociation stimulator-like 1 isoform X2
268,gene11156,0,0,12.490905,68.738948,0.076369,5.208361,0.067719,0.794687,0.989848,7,0.327933846,blue,gene11156,pre-mRNA-splicing factor 38B-like isoform X1
269,gene11158,0.327393,0.295302,1.485531,11.159139,0.066807,3.440859,0.014588,0.903865,0.993796,3,0.220479418,turquoise,gene11158,uncharacterized protein LOC111125950 isoform X1
270,gene11159,0,0,3.178501,73.478985,-0.08923,3.259254,0.026415,0.870892,0.993796,3,0.36960683,greenyellow,gene11159,xenotropic and polytropic retrovirus receptor 1-like isoform X1
271,gene11170,0.082132,0.075555,-1.176025,26.521816,0.330918,6.856408,1.307885,0.252778,0.921675,10,0.742017028,green,gene11170,dynamin-1-like isoform X1
272,gene11172,0.019009,0.027098,7.178522,20.91081,-0.416203,6.933694,2.258771,0.132859,0.863321,10,0.807790739,purple,gene11172,centriolin-like isoform X1
273,gene11182,0,0,4.008249,86.006287,-0.189773,5.124982,0.237506,0.626013,0.979867,7,0.382331579,blue,gene11182,ubiquitin carboxyl-terminal hydrolase 20-like isoform X1
274,gene11192,0.899395,0.562739,0.097456,3.569112,0.275632,4.664144,0.48717,0.485192,0.959339,6,0.228541181,blue,gene11192,tubulin-specific chaperone cofactor E-like protein
275,gene11193,0,0,4.726159,74.408588,0.20155,5.739458,0.216177,0.641968,0.981108,8,0.118471789,turquoise,gene11193,prenylated Rab acceptor protein 1-like isoform X1
276,gene11196,0.107403,0.072955,-3.747465,25.163372,-0.125164,4.373674,0.019093,0.8901,0.993796,6,0.683266032,turquoise,gene11196,uncharacterized protein LOC111124304
277,gene11204,0.154702,0.134025,0.310778,2.428038,-1.244547,4.44486,1.892939,0.168871,0.888303,6,0.602717306,turquoise,gene11204,uncharacterized protein LOC111123990 isoform X1
278,gene11206,0.750256,0.507359,0.288491,89.441198,-0.102302,5.394354,0.119455,0.729626,0.986801,8,0.401298981,purple,gene11206,TGF-beta receptor type-1-like
279,gene11215,0.000231,0.000513,-4.588977,66.379068,0.268623,5.389461,1.058125,0.303643,0.93226,8,0.222028397,red,gene11215,dnaJ homolog subfamily C member 13-like isoform X1
280,gene11217,0.170342,0.182572,1.122425,11.38468,-0.123379,3.859024,0.06972,0.791745,0.98952,4,0.493527526,red,gene11217,A disintegrin and metalloproteinase with thrombospondin motifs 10-like
281,gene11219,0.0285,0.035956,5.277745,64.630604,0.755199,5.404655,5.428984,0.019805,0.572692,8,0.484310494,pink,gene11219,TBC1 domain family member 1-like isoform X1
282,gene11224,0,0,-2.848762,47.704368,-0.374771,6.806032,1.886553,0.169591,0.888303,10,0.250309884,turquoise,gene11224,uncharacterized protein LOC111124306
283,gene11225,0.208655,0.205507,0.248966,4.956986,-0.391573,6.533282,2.058774,0.151332,0.878894,9,0.239237169,green,gene11225,LOW QUALITY PROTEIN: Krueppel-like factor 8
284,gene11229,0.223527,0.148137,4.278384,52.33506,0.345912,6.061268,1.387836,0.238771,0.916485,9,0.76964699,turquoise,gene11229,syntaxin-binding protein 1-like isoform X1
285,gene11230,0.748861,0.500424,0.150741,2.483938,-0.05167,6.971369,0.026103,0.871648,0.993796,10,0.878361892,turquoise,gene11230,rap guanine nucleotide exchange factor 1-like isoform X1
286,gene11239,0.19432,0.166265,-4.416964,27.47799,0.245571,7.665386,0.948561,0.330086,0.93226,10,0.657378661,green,gene11239,proteoglycan 4-like
287,gene11240,0.460469,0.285236,2.681769,33.673976,-0.093548,6.806717,0.079973,0.777334,0.987969,10,0.720091264,blue,gene11240,coiled-coil domain-containing protein 105-like isoform X1
288,gene11241,0,0,10.15425,55.879547,0.241302,6.429231,1.239733,0.265523,0.925349,9,0.327817345,green,gene11241,ras-related protein Rab-14
289,gene11242,0.350326,0.305319,-0.063603,1.590166,-0.756337,5.20259,4.438633,0.035134,0.689311,7,0.293150442,turquoise,gene11242,LIM domain transcription factor LMO4.1-like isoform X1
290,gene11246,0,0,10.976677,51.971056,0.620234,3.525915,0.848145,0.357078,0.93226,3,0.314778438,green,gene11246,uncharacterized protein LOC111124750
291,gene11247,0.56574,0.400456,-0.295896,6.671618,0.019398,5.069211,0.003398,0.953515,0.997184,7,0.615308823,green,gene11247,uncharacterized protein LOC111126432
292,gene11257,0.16869,0.132457,-3.000131,10.256574,0.290838,4.889549,0.461213,0.497058,0.960259,7,0.465643143,yellow,gene11257,crystallin J1A-like
293,gene11258,0.766654,0.514064,0.383702,9.987547,0.597141,4.312513,2.227934,0.135535,0.863321,5,0.508103172,green,gene11258,ribonuclease 3-like isoform X1
294,gene11260,0.047879,0.053399,3.866319,20.009366,0.111525,5.538172,0.090353,0.763729,0.987969,8,0.330727656,red,gene11260,neuronal calcium sensor 1-like
295,gene11266,0.137739,0.130638,2.835615,39.240663,0.622688,3.784479,1.403329,0.236167,0.916485,4,0.610561006,red,gene11266,kynurenine--oxoglutarate transaminase 3-like isoform X1
296,gene11267,0,0,4.69958,52.484573,0.821839,4.717742,5.719086,0.016781,0.543871,6,0.542187585,green,gene11267,E3 ubiquitin-protein ligase LRSAM1-like
297,gene1127,0.564841,0.387192,0.061252,5.453483,0.994486,4.081061,2.825034,0.092805,0.823221,5,0.608545157,turquoise,gene1127,secretin receptor-like isoform X1
298,gene11270,0.37103,0.25816,0.237251,1.368943,-0.202003,4.52264,0.063994,0.800291,0.990433,6,0.36327989,black,gene11270,uncharacterized protein LOC111122584 isoform X1
299,gene11273,0.000566,0.001188,-1.748738,67.801561,0.289578,4.600507,0.330933,0.56511,0.974934,6,0.445775985,pink,gene11273,uncharacterized protein LOC111127495
300,gene11281,0.001614,0.003174,-2.916159,13.179621,0.01491,4.955233,0.001596,0.968133,0.998341,7,0.593360532,yellow,gene11281,solute carrier family 35 member F5-like isoform X1
301,gene11283,0.042519,0.05291,-4.560508,31.021337,-0.496463,4.666804,1.360034,0.243532,0.920448,6,0.257352524,turquoise,gene11283,retinoic acid receptor alpha-A-like isoform X1
302,gene11284,0.016585,0.026339,-0.326927,0.370486,-0.307539,3.63243,0.302734,0.582173,0.977018,4,0.450928677,yellow,gene11284,uncharacterized protein LOC111126513
303,gene11286,0,0,-1.900959,55.953248,0.154266,8.455587,0.284385,0.593841,0.978657,10,0.449108009,green,gene11286,collagen alpha-1(I) chain-like isoform X1
304,gene11294,0.046963,0.062277,0.162475,0.245747,-0.167185,6.475891,0.102034,0.749402,0.987969,9,0.919779148,turquoise,gene11294,cell adhesion molecule 2-like isoform X1
305,gene11295,0.164533,0.155783,-0.166691,0.77083,-1.667875,3.394094,3.469765,0.0625,0.771175,3,0.619574295,red,gene11295,dopamine D2-like receptor
306,gene11296,0.77062,0.504298,-0.116951,2.298988,1.34915,4.322962,3.782917,0.051778,0.739527,5,0.693025479,turquoise,gene11296,kin of IRRE-like protein 1 isoform X1
307,gene11297,0.319033,0.204157,1.833515,23.535839,-0.303354,5.037423,0.696259,0.404044,0.944652,7,0.278152417,turquoise,gene11297,nephrin-like isoform X1
308,gene113,0.140662,0.156912,0.190228,0.924323,-0.168515,10.048677,0.295623,0.586639,0.977957,10,0.156479429,turquoise,gene113,LOW QUALITY PROTEIN: uncharacterized protein LOC111109745
309,gene11304,9.80E-05,0.000226,-2.082558,13.962889,-0.791826,5.949309,1.920711,0.165778,0.887552,9,0.368425155,blue,gene11304,senecionine N-oxygenase-like
310,gene11306,0.341676,0.218025,3.356428,15.273636,-0.287957,5.502646,0.511047,0.474686,0.957221,8,0.473730578,brown,gene11306,LOW QUALITY PROTEIN: uncharacterized protein LOC111124311
311,gene11308,0.018837,0.023983,0.792603,50.959487,0.152751,6.313955,0.219362,0.639527,0.981108,9,0.608939179,turquoise,gene11308,calponin homology domain-containing protein DDB_G0272472-like isoform X19
312,gene11309,0,0,17.212457,62.932286,0.01761,5.989993,0.001706,0.967057,0.998341,9,0.112994018,turquoise,gene11309,hypoxia up-regulated protein 1-like isoform X1
313,gene11310,1.50E-05,3.80E-05,-2.241083,74.587738,-0.094179,5.478333,0.107377,0.74315,0.987969,8,0.240403874,blue,gene11310,upstream stimulatory factor 2-like isoform X1
314,gene11311,0.073249,0.093692,-2.986806,9.835685,-0.279704,5.529613,0.586613,0.443732,0.954654,8,0.089921263,turquoise,gene11311,signal recognition particle receptor subunit alpha-like
315,gene11319,0.108927,0.108512,-1.268137,31.127134,0.338617,3.614771,0.304649,0.580983,0.977018,4,0.470464648,red,gene11319,nicastrin-like isoform X1
316,gene11321,5.00E-06,1.20E-05,2.977501,66.863098,-0.644767,3.41517,1.580096,0.208747,0.90532,3,0.198518756,turquoise,gene11321,cyclin-dependent kinases regulatory subunit 1-like
317,gene11324,0.987803,0.59253,0.016677,7.615246,-0.408269,6.516107,1.903481,0.167689,0.888303,9,0.340961888,red,gene11324,nucleolar protein 58-like
318,gene11325,0.007045,0.012276,0.26526,0.534217,-0.231978,4.506254,0.144406,0.70394,0.985225,6,0.716644326,purple,gene11325,uncharacterized protein LOC111125560
319,gene11337,0.328892,0.251267,-4.761334,29.961081,0.501847,4.928006,1.814647,0.177952,0.893207,7,0.140432724,turquoise,gene11337,LOW QUALITY PROTEIN: protein furry-like
320,gene11339,0.356327,0.246345,-1.405653,25.370309,-0.020379,8.849015,0.009227,0.923476,0.993796,10,0.634990495,green,gene11339,bromodomain-containing protein 3-like
321,gene11343,0,0,19.540045,45.255285,0.135083,6.177519,0.27996,0.596727,0.978657,9,0.362340119,green,gene11343,rab GTPase-activating protein 1-like isoform X1
322,gene11348,0.36703,0.289597,-0.490909,2.461088,3.90E-05,3.732167,1.00E-06,0.999383,0.999953,4,0.54404054,turquoise,gene11348,voltage-dependent calcium channel type A subunit alpha-1-like
323,gene11349,0.362131,0.316694,-0.06549,0.444855,-0.572093,4.412892,2.175408,0.140232,0.86433,6,0.482859801,blue,gene11349,uncharacterized protein LOC111124612 isoform X1
324,gene11354,0.045398,0.063136,1.251811,7.490886,-0.569523,4.907295,2.076669,0.149566,0.876049,7,0.475151053,turquoise,gene11354,uncharacterized protein LOC111124316
325,gene11362,1.00E-06,3.00E-06,4.604017,89.476591,0.018849,5.976006,0.002422,0.960749,0.997272,9,0.345456664,yellow,gene11362,LOW QUALITY PROTEIN: alpha-N-acetylgalactosaminidase-like
326,gene11364,0.045986,0.055629,-0.456377,19.875955,-0.085107,6.03032,0.083201,0.773006,0.987969,9,0.558999251,green,gene11364,LOW QUALITY PROTEIN: discoidin domain-containing receptor 2-like
327,gene11371,0.281307,0.2394,-0.264928,1.547331,-1.138133,4.246513,2.586901,0.107751,0.837579,5,0.359498009,brown,gene11371,cardioacceleratory peptide receptor-like
328,gene11374,0.429808,0.312838,-0.145779,8.94716,-1.01628,5.329616,3.102894,0.078153,0.797959,8,0.425299497,turquoise,gene11374,LOW QUALITY PROTEIN: cardioacceleratory peptide receptor-like
329,gene11376,0.035183,0.050724,4.105243,56.501213,0.189452,8.083739,0.592695,0.441379,0.953855,10,0.353543937,green,gene11376,uncharacterized protein LOC111124322
330,gene11377,0.172637,0.151825,0.608873,6.396242,-0.280364,7.171889,1.025852,0.311135,0.93226,10,0.33910904,turquoise,gene11377,LOW QUALITY PROTEIN: advillin-like
331,gene11379,0.022524,0.032287,-1.002487,69.963024,0.254948,8.417504,0.411588,0.521165,0.965536,10,0.859868766,black,gene11379,dnaJ homolog subfamily C member 7-like
332,gene11380,0.241336,0.237326,-0.15752,0.612448,-0.636542,3.394215,0.91452,0.338918,0.93226,3,0.227082701,blue,gene11380,putative carbonic anhydrase-like protein 1
333,gene11385,0.145394,0.161885,0.409704,2.499823,-0.491547,3.783679,0.424937,0.514484,0.964536,4,0.027529837,turquoise,gene11385,LOW QUALITY PROTEIN: neuronal acetylcholine receptor subunit alpha-2-like
334,gene11390,0,0,12.807663,21.50433,0.605897,4.124821,2.191558,0.138769,0.86433,5,0.343266213,turquoise,gene11390,LOW QUALITY PROTEIN: ubiquitin carboxyl-terminal hydrolase isozyme L5-like
335,gene11391,0.095501,0.075019,4.855288,32.057341,0.076169,6.017613,0.057856,0.809917,0.991391,9,0.435746505,black,gene11391,LOW QUALITY PROTEIN: neurogenic locus notch homolog protein 1-like
336,gene11392,0,0,6.174686,57.671227,1.051476,4.209158,6.469178,0.010976,0.504744,5,0.287527854,red,gene11392,U3 small nucleolar ribonucleoprotein protein IMP3-like
337,gene11395,0.303112,0.245979,-1.226309,5.218281,-0.129154,4.644307,0.069844,0.791564,0.98952,6,0.272709807,black,gene11395,uncharacterized protein LOC111123837
338,gene11396,0.433377,0.275855,0.912186,1.044914,0.038776,5.443067,0.010644,0.917829,0.993796,8,0.756064085,turquoise,gene11396,coiled-coil domain-containing protein 158-like isoform X1
339,gene11404,0.502168,0.394611,-0.116838,0.334594,-0.622652,5.958021,3.230799,0.072265,0.785599,9,0.248202762,blue,gene11404,LOW QUALITY PROTEIN: uncharacterized protein LOC111125225
340,gene11405,0.868539,0.5525,0.083493,1.707931,-0.076777,4.981331,0.053186,0.817609,0.992241,7,0.219367201,turquoise,gene11405,stromal interaction molecule 1-like
341,gene11419,0.213779,0.153799,-4.524438,74.31436,-0.127289,5.924145,0.035846,0.849834,0.992857,9,0.48138214,turquoise,gene11419,uncharacterized protein LOC111125837
342,gene11429,0,0,18.021035,33.763393,-0.206864,3.753529,0.149036,0.699458,0.984987,4,0.265740096,turquoise,gene11429,coiled-coil domain-containing protein 169-like isoform X14
343,gene11434,0.005406,0.009666,-0.975127,1.164138,1.157886,3.734136,3.409894,0.064807,0.772093,4,0.214207065,green,gene11434,uncharacterized protein LOC111126363
344,gene11437,1.80E-05,4.40E-05,-5.02602,89.318738,0.913649,7.726161,2.647237,0.10373,0.835156,10,0.240755892,red,gene11437,40S ribosomal protein S3
345,gene11438,0.084414,0.091137,-1.042529,19.554953,0.064728,5.35504,0.029277,0.864141,0.993796,8,0.55286647,turquoise,gene11438,protocadherin Fat 1-like isoform X1
346,gene11440,0.379814,0.327373,-0.572983,0.611672,0.467475,6.563022,2.236779,0.134761,0.863321,9,0.514812849,green,gene11440,phospholipid scramblase 2-like
347,gene11442,0.879688,0.554955,-0.065796,0.629442,-0.820121,3.254807,2.038557,0.153355,0.878894,3,0.12538424,turquoise,gene11442,LOW QUALITY PROTEIN: DNA polymerase epsilon catalytic subunit A-like
348,gene11445,0.118163,0.125395,-0.851331,56.630342,-0.165598,5.007516,0.197762,0.656533,0.981306,7,0.412387657,brown,gene11445,LOW QUALITY PROTEIN: glycerol kinase-like
349,gene11446,0.047632,0.04496,-3.244916,21.81352,-0.053429,5.833817,0.027057,0.869344,0.993796,9,0.42857262,turquoise,gene11446,protein C-ets-1-like isoform X2
350,gene11452,0.005518,0.00985,0.479723,1.328502,-0.367871,7.351913,0.883094,0.347356,0.93226,10,0.298083328,turquoise,gene11452,LOW QUALITY PROTEIN: tetraspanin-1-like
351,gene11455,0.025472,0.038341,2.589004,31.550292,0.470904,9.471823,0.781314,0.37674,0.939089,10,0.96619379,black,gene11455,LOW QUALITY PROTEIN: kelch-like protein 20
352,gene11456,0.626628,0.442301,-0.27413,68.592427,-0.246422,5.845336,0.512562,0.474032,0.957213,9,0.80471164,blue,gene11456,ankyrin repeat domain-containing protein 45-like isoform X1
353,gene11462,0.228401,0.196591,0.203114,34.862612,-0.596291,4.434259,1.56142,0.211457,0.90783,6,0.415617573,blue,gene11462,protein FAM173B-like
354,gene11468,0,0,-4.994665,20.146096,-0.182789,4.396713,0.073558,0.786225,0.988825,6,0.85435763,turquoise,gene11468,protocadherin Fat 1-like
355,gene11469,0.257265,0.248683,0.361486,0.484525,-1.402196,7.7904,7.587434,0.005878,0.40927,10,0.075075601,turquoise,gene11469,40S ribosomal protein S3
356,gene11472,0,0,-2.460631,51.965762,0.041264,3.86084,0.003222,0.954732,0.997184,4,0.709722676,turquoise,gene11472,uncharacterized protein LOC111127559
357,gene11473,0,0,-13.799202,43.938239,-0.176988,5.041456,0.154714,0.694071,0.984124,7,0.492817905,red,gene11473,protein FAM47A-like
358,gene11507,0,0,-19.794244,11.698937,-0.116675,4.934414,0.116477,0.732888,0.986937,7,0.289442211,turquoise,gene11507,tankyrase-1-like
359,gene1151,0,0,15.974654,4.410819,-0.802042,3.498392,1.034947,0.309,0.93226,3,0.121813394,turquoise,gene1151,uncharacterized protein LOC111133993
360,gene11512,0.029161,0.043073,0.610102,0.671422,-0.637509,8.96172,2.091612,0.14811,0.876049,10,0.413288713,magenta,gene11512,uncharacterized protein LOC111122663
361,gene11520,0.88832,0.559271,-0.161886,9.921171,-0.320401,5.275409,0.675114,0.411274,0.946349,8,0.600754647,yellow,gene11520,uncharacterized protein LOC111126164
362,gene11522,0.029933,0.034989,-2.349351,62.269509,-0.531147,3.747512,0.90361,0.341815,0.93226,4,0.044745697,turquoise,gene11522,exonuclease mut-7 homolog isoform X1
363,gene11527,3.00E-06,7.00E-06,6.954542,16.180244,-0.201004,4.32394,0.264321,0.607167,0.978657,5,0.500938017,green,gene11527,LOW QUALITY PROTEIN: DENN domain-containing protein 1B-like
364,gene11535,0.003839,0.007072,3.276352,15.137253,-0.341291,6.07314,1.358713,0.243761,0.920765,9,0.195606471,brown,gene11535,delta-aminolevulinic acid dehydratase-like isoform X1
365,gene11537,0.927866,0.572886,-0.048473,3.042781,0.111331,4.565065,0.079009,0.778644,0.988002,6,0.524345923,green,gene11537,anoctamin-3-like isoform X6
366,gene11539,0.009761,0.016463,-6.433426,14.878165,0.148447,5.254918,0.216784,0.641501,0.981108,8,0.718653283,blue,gene11539,Bardet-Biedl syndrome 7 protein homolog isoform X1
367,gene11541,0.324841,0.242689,-1.346131,51.772632,0.200187,6.599161,0.496447,0.481065,0.959052,9,0.597646974,turquoise,gene11541,LOW QUALITY PROTEIN: neurobeachin-like
368,gene11544,0.00192,0.00373,-1.493759,16.318164,0.116701,5.50211,0.114047,0.735583,0.986959,8,0.51693665,turquoise,gene11544,septin-11-like isoform X1
369,gene11546,0,0,3.674802,84.752545,-0.114284,5.747243,0.161879,0.687433,0.98412,8,0.757717634,green,gene11546,histone-lysine N-methyltransferase 2D-like isoform X1
370,gene11550,0.100616,0.106678,0.453643,1.397313,-0.549802,5.224589,1.216552,0.270038,0.927721,7,0.61336717,turquoise,gene11550,glycine receptor subunit alpha-2-like isoform X1
371,gene11553,9.60E-05,0.000222,-0.128822,0.624317,0.403501,7.152064,0.418563,0.517655,0.965262,10,0.297248821,red,gene11553,vascular endothelial growth factor C-like isoform X1
372,gene11554,0.101211,0.104186,-4.943863,83.96925,-0.595775,3.476605,1.461861,0.226634,0.913566,3,0.32974804,brown,gene11554,mediator of RNA polymerase II transcription subunit 16-like
373,gene11556,0,0,-29.256631,40.011338,0.090311,5.558604,0.046798,0.828732,0.992241,8,0.601935119,yellow,gene11556,heat shock 70 kDa protein 12A-like isoform X1
374,gene11557,0.141411,0.138978,0.449098,1.398283,0.412807,3.389726,0.36368,0.546469,0.969301,3,0.721392932,red,gene11557,adhesion G-protein coupled receptor G6-like isoform X2
375,gene11561,0,0,-6.386685,28.820433,-0.076327,4.133969,0.020777,0.885388,0.993796,5,0.153353905,red,gene11561,beta-galactosidase-1-like protein 2
376,gene11565,0.250973,0.183453,-4.3765,10.626479,-0.124543,3.669513,0.023111,0.879168,0.993796,4,0.522947041,turquoise,gene11565,ADAM 17-like protease isoform X1
377,gene11568,0.091374,0.096274,3.3049,34.522979,1.926865,4.069295,7.094139,0.007734,0.463461,5,0.407928023,turquoise,gene11568,ADAM 17-like protease
378,gene11571,0.134294,0.119504,1.058968,43.776942,0.599725,4.229664,1.234267,0.266579,0.925548,5,0.284800503,red,gene11571,serum paraoxonase/arylesterase 1-like isoform X1
379,gene11572,0.000186,0.000418,1.708798,83.738858,-0.181979,3.618467,0.127657,0.720874,0.98622,4,0.538596085,blue,gene11572,death-associated protein 1-like
380,gene11574,0.076308,0.084032,-2.067957,61.900815,-0.189313,6.798854,0.634302,0.425782,0.951191,10,0.72456216,green,gene11574,LOW QUALITY PROTEIN: spectrin alpha chain-like
381,gene11577,0.17781,0.156362,-5.557482,60.710866,-0.068491,4.798677,0.031045,0.86014,0.993458,7,0.406694736,blue,gene11577,LOW QUALITY PROTEIN: ubiquitin carboxyl-terminal hydrolase 46-like
382,gene11581,0,0,-0.020566,77.926546,0.533204,4.380759,2.228876,0.135452,0.863321,6,0.450892926,green,gene11581,coiled-coil domain-containing protein 22 homolog
383,gene11582,0.424083,0.313756,-1.084988,5.982473,-0.13268,5.271687,0.106774,0.743847,0.987969,8,0.809800539,blue,gene11582,LOW QUALITY PROTEIN: sodium channel and clathrin linker 1-like
384,gene11584,0.134074,0.15209,0.552634,1.144422,0.614449,11.24457,0.701279,0.402354,0.944652,10,0.367136615,green,gene11584,uncharacterized protein LOC111122634
385,gene11588,0.079712,0.100408,-1.178526,14.774991,0.329406,5.560122,0.594775,0.440579,0.953855,8,0.562533743,black,gene11588,LOW QUALITY PROTEIN: carnitine O-acetyltransferase-like
386,gene11589,0.667121,0.472448,-0.273492,1.099339,0.637246,4.604718,2.329429,0.126948,0.8592,6,0.588525303,green,gene11589,uncharacterized protein LOC111124703 isoform X1
387,gene11590,0.745431,0.505454,-0.228003,26.253324,-0.113587,7.753274,0.258232,0.611337,0.978657,10,0.312389111,turquoise,gene11590,LOW QUALITY PROTEIN: ras GTPase-activating protein nGAP-like
388,gene11595,0,0,-7.027436,81.385881,-0.389482,5.795611,1.816207,0.177765,0.893207,8,0.040033022,turquoise,gene11595,LOW QUALITY PROTEIN: breast cancer anti-estrogen resistance protein 3 homolog
389,gene11596,0,0,15.340455,14.291869,0.406717,9.29848,0.753177,0.385472,0.93925,10,0.949261933,black,gene11596,flotillin-1-like isoform X1
390,gene1160,0.275706,0.250084,-0.587101,6.89246,0.392325,3.98237,0.690809,0.405889,0.945588,5,0.363014924,turquoise,gene1160,mediator of RNA polymerase II transcription subunit 14-like
391,gene11600,6.00E-06,1.50E-05,1.938137,7.765191,0.095866,5.191983,0.022698,0.880246,0.993796,7,0.355113265,brown,gene11600,LOW QUALITY PROTEIN: A-kinase anchor protein 7-like
392,gene11606,0.230469,0.22971,-0.053999,7.978903,-0.19974,7.638701,0.731082,0.392533,0.941463,10,0.619027356,blue,gene11606,hsc70-interacting protein-like
393,gene11610,0.289254,0.222348,0.583716,0.495358,0.409741,4.320119,0.255789,0.613028,0.978657,5,0.789678276,turquoise,gene11610,LOW QUALITY PROTEIN: hemicentin-2-like
394,gene11621,0.405729,0.341878,-0.45436,1.31233,0.241637,3.161119,0.168254,0.681668,0.983916,2,0.252994245,brown,gene11621,LOW QUALITY PROTEIN: transmembrane protein 41A-like
395,gene11627,0.128456,0.110122,1.154141,34.068726,0.138601,5.757246,0.219341,0.639542,0.981108,8,0.425121607,green,gene11627,mitogen-activated protein kinase kinase kinase 2-like
396,gene11628,0,0,2.922527,33.641376,-0.309457,5.373651,0.477372,0.489615,0.959339,8,0.597630726,black,gene11628,DNA primase small subunit-like
397,gene11630,0.199588,0.168841,4.920192,18.525023,-0.349583,5.70307,0.426967,0.513481,0.964536,8,0.370342573,black,gene11630,LOW QUALITY PROTEIN: protein turtle-like
398,gene11635,0.46938,0.37776,0.819226,40.522509,-0.552433,3.616014,0.904891,0.341474,0.93226,4,0.297990883,green,gene11635,uncharacterized protein LOC111123778
399,gene11636,0.351359,0.266853,-0.569005,3.485178,-2.305441,4.513565,3.509459,0.061019,0.768315,6,-0.098173705,turquoise,gene11636,F-box/LRR-repeat protein 4-like
400,gene11637,0.45478,0.363515,0.424607,2.189637,-0.191279,7.86037,0.139189,0.709088,0.98555,10,0.014858338,turquoise,gene11637,uncharacterized protein LOC111123779 isoform X1
401,gene11643,0,0,15.677831,24.875886,0.350441,4.945461,0.164479,0.685066,0.98412,7,0.556889537,turquoise,gene11643,etoposide-induced protein 2.4 homolog isoform X1
402,gene11664,0.512889,0.400361,-0.495963,13.90123,0.260253,5.673756,0.276215,0.599193,0.978657,8,0.737796864,turquoise,gene11664,LOW QUALITY PROTEIN: low-density lipoprotein receptor-related protein 1-like
403,gene11665,0.449187,0.281251,-1.035941,1.320215,-0.040632,3.117761,0.005261,0.942179,0.995637,2,-7.57E-05,turquoise,gene11665,LOW QUALITY PROTEIN: uncharacterized protein LOC111126050
404,gene11667,0,0,2.552472,87.880159,0.162392,4.868097,0.178444,0.672713,0.983547,7,0.319581889,turquoise,gene11667,NEDD8 ultimate buster 1-like
405,gene11668,0.375988,0.325181,-1.335598,23.348784,0.5619,3.339045,1.237137,0.266024,0.925548,3,0.358261809,turquoise,gene11668,CTD small phosphatase-like protein
406,gene11672,0.469486,0.290107,-1.609929,4.308517,0.478956,4.500072,1.47223,0.224994,0.911329,6,0.379923963,turquoise,gene11672,LOW QUALITY PROTEIN: WW domain-binding protein 4-like
407,gene11680,0.154039,0.169202,-2.070885,10.918938,-0.45688,4.444944,0.84664,0.357505,0.93226,6,0.118544969,pink,gene11680,cubilin-like isoform X1
408,gene11690,0.233579,0.155381,6.567242,21.747685,0.347215,4.516904,0.674055,0.411641,0.946349,6,0.028517168,turquoise,gene11690,uncharacterized protein LOC111127022
409,gene11691,0.040129,0.043796,-7.700695,31.171803,-0.069177,6.208007,0.076475,0.782132,0.988497,9,0.693771341,green,gene11691,LOW QUALITY PROTEIN: protein Shroom3-like
410,gene11692,0.100948,0.093197,2.341957,49.541702,-0.026028,5.026185,0.003921,0.950072,0.997184,7,0.661388336,blue,gene11692,"lipoyl synthase, mitochondrial-like"
411,gene11696,0.606225,0.429329,-0.032573,45.586776,0.350161,4.926992,1.098845,0.29452,0.931337,7,0.506640485,green,gene11696,LOW QUALITY PROTEIN: rho GTPase-activating protein 26-like
412,gene117,0.877703,0.555602,-0.104032,1.436569,0.730492,9.241251,2.585114,0.107873,0.837579,10,0.92033536,black,gene117,titin-like
413,gene11700,0.592608,0.439235,0.407216,37.535193,-0.32741,5.551582,1.111362,0.291786,0.930457,8,0.749226309,turquoise,gene11700,LOW QUALITY PROTEIN: protein unc-50 homolog
414,gene11701,0,0,4.591927,4.873123,0.708074,8.344596,2.710459,0.099692,0.826446,10,0.933003399,black,gene11701,LOW QUALITY PROTEIN: uncharacterized protein LOC111124757
415,gene11703,7.00E-06,1.80E-05,3.108044,50.088211,0.149383,7.282874,0.356021,0.550725,0.97109,10,0.630347391,green,gene11703,heat shock 70 kDa protein 12A-like
416,gene11706,0.228527,0.165567,-6.985131,27.220206,0.925292,8.146503,3.869537,0.04917,0.732911,10,0.271200903,red,gene11706,uncharacterized protein LOC111123845 isoform X1
417,gene11707,0.441719,0.362559,-1.280214,7.99058,0.034645,5.79887,0.011926,0.913038,0.993796,8,0.409718274,yellow,gene11707,LOW QUALITY PROTEIN: uncharacterized protein LOC111123198
418,gene11708,0.03212,0.046836,-3.945924,16.176299,-0.245198,5.566451,0.148777,0.699707,0.985024,8,0.329857465,blue,gene11708,LOW QUALITY PROTEIN: heat shock 70 kDa protein 12A-like
419,gene1171,0.344142,0.306131,0.154364,0.153712,0.20918,5.464676,0.216145,0.641993,0.981108,8,0.825954692,turquoise,gene1171,uncharacterized protein LOC111121381 isoform X1
420,gene11710,0.579247,0.432967,-0.764037,3.760018,0.12275,6.796996,0.185917,0.666337,0.983434,10,0.312707182,purple,gene11710,LOW QUALITY PROTEIN: calnexin-like
421,gene11714,0.002022,0.003914,0.158443,0.312421,-0.472404,6.833745,2.286527,0.130502,0.861968,10,0.350978638,blue,gene11714,uncharacterized protein LOC111122684
422,gene11715,0.453844,0.282852,3.320535,32.854048,0.081266,3.724365,0.036703,0.84807,0.992349,4,0.189056198,red,gene11715,protein inturned-like isoform X1
423,gene11719,0.496953,0.297252,0.084165,0.410308,-0.031925,8.026609,0.006142,0.937531,0.994931,10,0.81021021,blue,gene11719,uncharacterized protein LOC111125298 isoform X1
424,gene11720,0,0,21.813343,15.220422,-1.042039,3.264828,1.943494,0.16329,0.885762,3,0.350075702,brown,gene11720,box C/D snoRNA protein 1-like
425,gene11721,0.029037,0.042943,0.279595,2.763951,0.131013,6.971908,0.162266,0.687079,0.98412,10,0.595110714,brown,gene11721,LOW QUALITY PROTEIN: proteasome subunit beta type-7-like
426,gene11724,0,0,-11.001491,51.854668,-0.283869,4.528209,0.523487,0.469358,0.956091,6,0.32029132,blue,gene11724,LOW QUALITY PROTEIN: serine/threonine-protein kinase Nek7-like
427,gene11725,0.000288,0.000633,-3.816084,70.864513,0.633793,5.958715,3.59123,0.058085,0.757556,9,0.417426,turquoise,gene11725,LOW QUALITY PROTEIN: nuclear pore complex protein Nup214-like
428,gene11726,0,0,-13.156215,32.983421,-0.21515,4.993903,0.163463,0.685988,0.98412,7,0.574255415,red,gene11726,transcription initiation factor IIB-like
429,gene11731,0,0,-0.333435,0.530012,2.647012,4.213493,19.784579,9.00E-06,0.011628,5,0.110456426,turquoise,gene11731,LOW QUALITY PROTEIN: uncharacterized protein LOC111124915
430,gene11740,0,0,9.739173,66.830286,0.063477,9.706134,0.097641,0.75468,0.987969,10,0.824507086,green,gene11740,LOW QUALITY PROTEIN: protein PRRC2C-like
431,gene11741,0.350056,0.243565,-1.883311,46.850511,0.052708,6.051544,0.051621,0.820267,0.992241,9,0.605344534,green,gene11741,protein FAM102A-like
432,gene11747,0.000225,0.000481,-7.275288,17.307708,-0.320202,6.492107,1.234479,0.266538,0.925548,9,0.624655771,brown,gene11747,proteasome subunit beta type-1-like
433,gene11748,0.248448,0.242614,0.968788,8.014856,0.085096,5.070201,0.04914,0.824566,0.992241,7,0.390272291,blue,gene11748,LOW QUALITY PROTEIN: U4/U6 small nuclear ribonucleoprotein Prp4-like
434,gene11750,0.000646,0.001347,-6.478094,41.349253,-0.263025,4.421116,0.403398,0.52534,0.967156,6,0.660235409,brown,gene11750,"ubiquinone biosynthesis protein COQ4 homolog, mitochondrial-like"
435,gene11751,0,0,-6.088394,42.623089,-0.07936,3.534002,0.019998,0.887542,0.993796,3,0.549964907,blue,gene11751,gamma-glutamyltranspeptidase 1-like
436,gene11753,0.000491,0.000973,-1.844155,27.411517,-1.034504,6.990202,13.869315,0.000196,0.082334,10,0.389079587,blue,gene11753,"DNA-directed RNA polymerases I, II, and III subunit RPABC3-like"
437,gene11755,0.356226,0.246213,-3.431218,78.54067,0.083499,5.770875,0.08903,0.765413,0.987969,8,0.215313305,turquoise,gene11755,uncharacterized protein LOC111125290 isoform X1
438,gene11756,0.056464,0.059005,5.084775,7.946703,-0.140556,5.626162,0.122594,0.726238,0.98622,8,0.503214156,turquoise,gene11756,uncharacterized protein LOC111123938 isoform X1
439,gene11757,0.000381,0.000823,1.800519,75.919737,-0.895013,5.238533,1.262355,0.261206,0.925081,7,0.226493303,blue,gene11757,NADH-ubiquinone oxidoreductase 49 kDa subunit-like
440,gene11765,0,0,6.7055,73.979771,0.836185,5.405034,2.109095,0.146426,0.875833,8,0.314252637,blue,gene11765,NADH-ubiquinone oxidoreductase 49 kDa subunit-like
441,gene1177,0.235805,0.18946,7.670425,34.707065,0.257857,6.368653,0.255715,0.613079,0.978657,9,0.747469984,black,gene1177,LOW QUALITY PROTEIN: cytosolic carboxypeptidase 1-like
442,gene11787,0.938516,0.576213,0.062667,68.573299,-0.35572,4.472058,0.779743,0.37722,0.939089,6,0.327665039,red,gene11787,calpain-5-like isoform X1
443,gene11788,0.041676,0.05303,1.491432,28.731221,0.307582,6.592324,1.150317,0.283483,0.928733,9,0.714030536,turquoise,gene11788,LOW QUALITY PROTEIN: DNA topoisomerase 2-beta-like
444,gene11790,0.232114,0.16194,-0.716638,54.030851,0.045992,5.71229,0.020758,0.885439,0.993796,8,0.045222079,turquoise,gene11790,mitogen-activated protein kinase kinase kinase 13-like isoform X1
445,gene11795,0.001033,0.001936,-3.585851,44.854564,0.37225,4.875471,0.913261,0.339251,0.93226,7,0.304800585,turquoise,gene11795,nuclear pore glycoprotein p62-like
446,gene118,0.855421,0.54757,0.047088,0.255597,-0.248114,5.08422,0.060304,0.806017,0.991016,7,0.839031632,turquoise,gene118,LOW QUALITY PROTEIN: hemicentin-1-like
447,gene1180,0,0,-6.904651,8.324955,-0.98108,4.290205,2.248269,0.133764,0.863321,5,0.11075459,turquoise,gene1180,LOW QUALITY PROTEIN: uncharacterized protein LOC111106210
448,gene11804,0.063467,0.083248,2.518318,63.300293,-0.07231,4.690917,0.039569,0.842326,0.992241,6,0.322078284,turquoise,gene11804,dynactin subunit 5-like
449,gene11805,1.20E-05,3.10E-05,-1.51492,70.742359,0.363976,3.901936,0.531357,0.466037,0.956091,4,0.234457027,turquoise,gene11805,putative neutral sphingomyelinase
450,gene1181,0.544192,0.413034,0.003358,0.701648,0.702109,9.123589,1.640867,0.200207,0.902368,10,0.974551124,black,gene1181,LOW QUALITY PROTEIN: G-protein coupled receptor GRL101-like
451,gene11817,0.534749,0.411657,0.637226,6.766122,0.307984,3.742644,0.23731,0.626156,0.979867,4,0.449822748,yellow,gene11817,retinol dehydrogenase 7-like
452,gene11821,0.683819,0.474236,0.160215,32.314097,0.153146,7.1914,0.295049,0.587003,0.978026,10,0.325550362,yellow,gene11821,uncharacterized protein LOC111124358
453,gene11823,0.136432,0.132582,0.011932,37.350643,0.298601,5.758485,0.79806,0.371674,0.938043,8,0.713740803,blue,gene11823,tetratricopeptide repeat protein 16-like isoform X1
454,gene11836,0.005256,0.008799,4.380258,13.382591,-0.473452,4.801568,1.524088,0.217002,0.910591,7,0.336035274,magenta,gene11836,dolichyldiphosphatase 1-like isoform X1
455,gene11838,0.064382,0.073691,1.119166,21.216236,-0.359311,5.498096,1.360379,0.243472,0.920423,8,-0.010527851,turquoise,gene11838,ELAV-like protein 1 isoform X1
456,gene11839,0.897025,0.561935,-0.079,10.165369,0.304028,4.488922,0.427198,0.513367,0.964536,6,0.473957702,brown,gene11839,ELAV-like protein 3 isoform X1
457,gene11840,0.40673,0.34252,0.106528,0.541582,-0.52019,5.537656,1.642658,0.199961,0.902231,8,0.191283204,red,gene11840,uncharacterized protein LOC111126625 isoform X1
458,gene11841,0,0,-3.452008,77.814178,0.529901,5.358961,1.598423,0.206127,0.90532,8,0.242154396,blue,gene11841,CCR4-NOT transcription complex subunit 9-like
459,gene11843,0,0,2.887979,4.402663,0.350713,4.859458,0.196751,0.657356,0.981306,7,0.919436766,turquoise,gene11843,uncharacterized protein LOC111125078
460,gene11846,0,0,9.132078,68.620726,0.126164,5.207105,0.140433,0.707851,0.985478,7,0.209838841,brown,gene11846,putative Ras-related protein Rab-33
461,gene11847,0,0,-18.769756,69.927025,0.117485,5.796937,0.121051,0.727898,0.986238,8,0.577130849,turquoise,gene11847,"LOW QUALITY PROTEIN: N-alpha-acetyltransferase 15, NatA auxiliary subunit-like"
462,gene11848,0.520507,0.404192,-0.175571,8.147528,0.802943,4.14039,1.3826,0.239659,0.917543,5,0.675990157,turquoise,gene11848,uncharacterized protein LOC111124359
463,gene11849,0.153569,0.131688,-0.848904,22.771159,0.527968,4.318504,1.121709,0.289551,0.930457,5,0.157199318,black,gene11849,NTF2-related export protein 2-like isoform X2
464,gene11856,0.59121,0.390274,0.072669,2.542084,-0.344913,5.781837,0.192395,0.660931,0.98237,8,0.868678533,turquoise,gene11856,uncharacterized protein LOC111125499
465,gene1186,0.168362,0.154321,0.459743,5.180841,0.64388,10.51915,1.440261,0.230097,0.915411,10,0.974578153,black,gene1186,coadhesin-like isoform X2
466,gene11863,0.255792,0.24767,0.048463,0.345202,-0.139101,5.795815,0.14905,0.699445,0.984987,8,0.635916039,red,gene11863,glutamic acid-rich protein-like isoform X6
467,gene11865,0.017002,0.026925,3.850516,71.706658,0.096388,4.409457,0.033183,0.855456,0.993016,6,0.344590134,blue,gene11865,phosphoglucomutase-2-like
468,gene11867,0,0,3.855701,18.635039,0.255298,5.917361,0.917929,0.338019,0.93226,9,0.39495463,green,gene11867,LOW QUALITY PROTEIN: cytoplasmic FMR1-interacting protein 1-like
469,gene11871,0.003281,0.005755,-3.869696,46.581901,0.314451,4.826254,0.505444,0.477118,0.95729,7,0.328806434,yellow,gene11871,uncharacterized protein LOC111125516
470,gene11872,1.00E-06,3.00E-06,-4.926602,79.172001,0.188092,4.064882,0.130802,0.717602,0.98622,5,0.532907872,yellow,gene11872,RING finger protein 44-like
471,gene11881,0,0,-4.260419,49.031444,0.284562,4.288194,0.612159,0.433976,0.953042,5,0.230165133,green,gene11881,LOW QUALITY PROTEIN: suppressor APC domain-containing protein 2-like
472,gene11885,0.417109,0.34862,-0.334859,0.282031,-0.149549,3.61827,0.102665,0.748655,0.987969,4,0.08656697,red,gene11885,urea-proton symporter DUR3-like
473,gene11886,0.699203,0.486739,-0.177872,1.587996,-0.024988,4.785883,0.005767,0.939467,0.995158,6,0.465477934,brown,gene11886,ER membrane protein complex subunit 6-like isoform X1
474,gene11887,0.299239,0.24257,-0.396783,0.411896,0.433111,6.143539,2.341294,0.125985,0.8592,9,0.770032084,pink,gene11887,kelch-like protein 5 isoform X1
475,gene11888,0.508099,0.358885,0.459565,21.309226,1.137846,10.353659,4.406382,0.035805,0.692337,10,0.862607993,black,gene11888,LOW QUALITY PROTEIN: uncharacterized protein LOC111124594
476,gene119,0.018373,0.028208,0.774697,1.365694,-1.320173,4.849962,8.512954,0.003526,0.354677,7,0.401357193,turquoise,gene119,organic cation transporter protein-like
477,gene11903,0,0,2.420187,43.267468,0.323994,3.630184,0.39716,0.528559,0.967269,4,0.568628502,brown,gene11903,replication factor C subunit 3-like
478,gene11905,0.867043,0.551809,0.11817,5.531726,-0.399002,6.793877,1.799325,0.179794,0.893782,10,0.448029868,turquoise,gene11905,putative protocadherin beta-18
479,gene11919,0.624888,0.454436,-0.596986,16.417693,0.403089,3.520072,0.319648,0.571819,0.976289,3,0.250350911,black,gene11919,H(+)/Cl(-) exchange transporter 3-like isoform X1
480,gene11964,1.30E-05,3.10E-05,0.901652,32.844756,-0.17844,4.590768,0.251678,0.615896,0.978657,6,0.338880373,blue,gene11964,transmembrane protein 33-like
481,gene11968,0,0,13.919362,61.129745,-0.815257,4.529365,0.930678,0.334687,0.93226,6,0.293101828,turquoise,gene11968,galectin-4-like
482,gene1197,0.456939,0.371326,-0.484116,12.233072,0.117269,7.044393,0.178025,0.673076,0.983547,10,0.717320772,turquoise,gene1197,RNA polymerase II elongation factor ELL-like
483,gene11979,0.362054,0.301715,0.524078,3.352335,0.057617,4.936668,0.021449,0.883561,0.993796,7,0.219010705,brown,gene11979,uncharacterized protein LOC111125816 isoform X1
484,gene1198,0,0,-13.475258,17.412979,-0.67299,6.521599,4.382033,0.03632,0.693689,9,0.29723183,brown,gene1198,LOW QUALITY PROTEIN: tripartite motif-containing protein 59-like
485,gene11981,0.109167,0.117657,0.790622,2.23567,0.967541,3.448975,1.538842,0.21479,0.909234,3,0.627770596,turquoise,gene11981,uncharacterized protein LOC111122521 isoform X1
486,gene11999,0.155734,0.125559,-0.010296,38.265628,0.285263,5.277741,0.149876,0.698654,0.984987,8,0.920434743,turquoise,gene11999,transmembrane protein 184C-like
487,gene1200,0.313489,0.286137,0.167596,0.654674,0.57428,4.060838,1.178982,0.277563,0.928733,5,0.766104901,black,gene1200,LOW QUALITY PROTEIN: gonadotropin-releasing hormone II receptor-like
488,gene12001,0.269113,0.189871,0.617949,7.24588,-0.084106,6.294053,0.053882,0.816442,0.992241,9,0.578063603,black,gene12001,LOW QUALITY PROTEIN: protocadherin Fat 4-like
489,gene12008,0.130592,0.11929,4.080064,48.425896,0.296428,4.679335,0.587006,0.443579,0.954654,6,0.235961325,blue,gene12008,LOW QUALITY PROTEIN: coiled-coil domain-containing protein 138-like
490,gene12013,0.063954,0.059786,2.152643,40.247565,-0.511051,6.831584,3.676465,0.055186,0.749776,10,0.654788406,blue,gene12013,outer dense fiber protein 2-like isoform X1
491,gene12022,2.00E-06,5.00E-06,-9.003152,55.9418,0.132525,9.724638,0.10562,0.745187,0.987969,10,0.859541718,black,gene12022,mitochondria-eating protein-like isoform X1
492,gene12023,0.700065,0.487128,1.031684,39.232508,0.272387,3.368471,0.267003,0.605349,0.978657,3,0.03630572,turquoise,gene12023,LOW QUALITY PROTEIN: E3 ubiquitin-protein ligase TRIM38-like
493,gene12024,0.383389,0.260561,1.274728,29.270383,-0.565515,4.530728,0.341564,0.558928,0.974759,6,0.87390644,turquoise,gene12024,LOW QUALITY PROTEIN: uncharacterized protein LOC111126709
494,gene12026,0.187685,0.150412,1.592601,12.010308,-0.238148,7.670453,1.282179,0.257494,0.923776,10,0.408926288,turquoise,gene12026,LOW QUALITY PROTEIN: ETS translocation variant 5-like
495,gene12027,0.329164,0.234422,-0.406057,1.120236,0.562796,5.160647,0.83492,0.360854,0.932839,7,0.539005601,turquoise,gene12027,uncharacterized protein LOC111122881
496,gene1203,8.00E-06,2.10E-05,-2.612735,4.079733,0.10297,4.432457,0.050713,0.821827,0.992241,6,0.087068058,turquoise,gene1203,LOW QUALITY PROTEIN: uncharacterized protein LOC111111571
497,gene12036,0.030225,0.04004,5.038316,12.184073,-0.801354,5.00073,5.188054,0.022743,0.601835,7,0.389135009,magenta,gene12036,anaphase-promoting complex subunit 13-like isoform X1
498,gene12037,0,0,-9.834912,78.962988,-0.560672,4.243131,1.995013,0.157818,0.883526,5,0.382537852,grey,gene12037,"persulfide dioxygenase ETHE1, mitochondrial-like isoform X1"
499,gene12041,0.104985,0.095736,7.800009,33.905027,0.086612,4.852225,0.046883,0.828579,0.992241,7,0.504090596,red,gene12041,LOW QUALITY PROTEIN: amyloid beta A4 precursor protein-binding family B member 2-like
500,gene12043,0.40062,0.338992,0.245697,0.141538,-0.240429,4.894044,0.469708,0.493122,0.960128,7,0.236844287,turquoise,gene12043,LOW QUALITY PROTEIN: ubinuclein-1-like
501,gene12047,0.116568,0.103089,0.606152,27.83944,-0.132169,3.900478,0.019407,0.889205,0.993796,4,0.907399774,turquoise,gene12047,LOW QUALITY PROTEIN: serine/threonine-protein phosphatase with EF-hands 2-like
502,gene12050,0.117644,0.103677,2.64248,18.880005,-0.092833,7.291313,0.176764,0.674169,0.983547,10,0.749477962,green,gene12050,LOW QUALITY PROTEIN: AF4/FMR2 family member 4-like
503,gene12051,0.388621,0.293171,3.28842,55.862226,0.041122,4.956054,0.012351,0.91151,0.993796,7,0.351358487,yellow,gene12051,F-box/WD repeat-containing protein 7-like
504,gene12056,4.00E-05,9.40E-05,3.118771,6.332909,0.017268,5.017575,0.001766,0.966483,0.998312,7,0.027572827,turquoise,gene12056,uncharacterized protein LOC111123749 isoform X1
505,gene12058,3.10E-05,7.60E-05,5.680497,77.56687,-0.178891,6.434035,0.36602,0.545182,0.969301,9,0.723504107,turquoise,gene12058,LOW QUALITY PROTEIN: C-Jun-amino-terminal kinase-interacting protein 4-like
506,gene12060,0.306751,0.21881,-0.037894,25.504285,-0.107743,6.228113,0.155425,0.693404,0.984124,9,0.69610571,yellow,gene12060,LOW QUALITY PROTEIN: adenylate cyclase type 9-like
507,gene12061,0,0,-3.533677,82.978121,-0.13891,5.964199,0.327044,0.567405,0.975293,9,0.518489216,green,gene12061,LOW QUALITY PROTEIN: CREB-binding protein-like
508,gene12068,0.191305,0.198803,1.53929,8.635873,0.008544,3.350617,0.000294,0.986316,0.999244,3,0.494962874,brown,gene12068,14 kDa phosphohistidine phosphatase-like
509,gene12073,0.633435,0.458217,-1.634551,36.040921,-0.332847,8.007437,1.570331,0.210159,0.9056,10,0.373631243,yellow,gene12073,amyloid beta A4 protein-like isoform X1
510,gene12081,0.000377,0.000814,-2.288556,82.803197,0.059465,4.047996,0.018823,0.890875,0.993796,5,0.124997624,black,gene12081,snRNA-activating protein complex subunit 4-like
511,gene12086,0.349314,0.309051,-0.040787,0.286351,-0.481915,6.844173,0.999283,0.317484,0.93226,10,0.821078886,yellow,gene12086,amyloid beta A4 protein-like isoform X1
512,gene121,0.013036,0.021269,0.998509,3.453455,0.117565,4.43834,0.074457,0.784955,0.988825,6,0.532432015,yellow,gene121,galactoside 3(4)-L-fucosyltransferase-like
513,gene1210,0,0,-3.065843,2.5641,-0.419095,6.52794,1.74012,0.187124,0.896825,9,0.25546393,blue,gene1210,uncharacterized protein LOC111128027
514,gene12100,0.500287,0.338407,0.467118,10.417569,-0.081496,3.814726,0.013122,0.908802,0.993796,4,0.687208432,turquoise,gene12100,hemicentin-1-like isoform X3
515,gene12103,0.442396,0.305784,-0.53693,10.009369,0.531947,6.454179,1.364683,0.242728,0.920192,9,0.298101687,turquoise,gene12103,uncharacterized protein LOC111126999
516,gene12118,0.573962,0.430347,-0.675676,4.992544,-0.651592,3.35763,1.086551,0.297237,0.931462,3,-0.006491232,turquoise,gene12118,angio-associated migratory cell protein-like
517,gene12120,0.127369,0.131546,-2.412286,31.258556,0.471619,3.707147,0.647254,0.421096,0.950565,4,0.516631537,red,gene12120,voltage-dependent L-type calcium channel subunit beta-1-like isoform X1
518,gene12126,0.494698,0.391049,-0.470943,61.987468,0.376622,4.518037,0.272733,0.601504,0.978657,6,0.803359517,turquoise,gene12126,coiled-coil domain-containing protein 134-like
519,gene12137,0,0,8.642996,23.904749,0.311171,3.324378,0.336226,0.562016,0.974759,3,0.642709018,yellow,gene12137,voltage-dependent L-type calcium channel subunit beta-1-like isoform X1
520,gene12141,0,0,6.509607,49.091213,-0.298792,4.301498,0.5779,0.447137,0.956091,5,0.444298709,blue,gene12141,LOW QUALITY PROTEIN: protein SCAI-like
521,gene12147,0.541857,0.35471,-0.531648,26.314569,-0.403049,5.674102,1.808698,0.178665,0.893782,8,0.481773582,green,gene12147,latent-transforming growth factor beta-binding protein 1-like isoform X1
522,gene1215,0.432995,0.357718,0.238647,1.105594,-1.137369,3.27331,2.338644,0.126199,0.8592,3,0.239871262,brown,gene1215,"LOW QUALITY PROTEIN: tRNA modification GTPase GTPBP3, mitochondrial-like"
523,gene12152,0,0,-6.368511,57.58627,-0.046064,6.103155,0.013468,0.907611,0.993796,9,0.585386813,black,gene12152,muscle-specific protein 20-like isoform X1
524,gene12155,0,0,8.754575,8.122345,-2.57539,4.854633,7.669985,0.005615,0.40927,7,0.920075089,greenyellow,gene12155,NEDD8-conjugating enzyme ubc12-like
525,gene12160,0.028097,0.041718,-1.03445,4.384079,-1.173973,3.357352,5.452458,0.019541,0.572692,3,0.483921259,brown,gene12160,DNA-directed RNA polymerase I subunit RPA12-like
526,gene12161,0.001537,0.00288,5.018624,19.61772,0.029644,5.725341,0.010913,0.916802,0.993796,8,0.451540137,black,gene12161,LOW QUALITY PROTEIN: alsin-like
527,gene12168,0,0,7.588636,26.211196,0.079139,7.349834,0.083058,0.773196,0.987969,10,0.253637976,turquoise,gene12168,uncharacterized protein LOC111125833 isoform X1
528,gene1217,0.055809,0.065827,0.537579,1.236766,1.846715,4.801333,10.683879,0.001081,0.230499,7,0.562077194,green,gene1217,estrogen sulfotransferase-like
529,gene12173,0.048106,0.066268,-0.992012,3.574005,-0.084449,5.946233,0.086946,0.768097,0.987969,9,0.302276608,blue,gene12173,LOW QUALITY PROTEIN: DDB1- and CUL4-associated factor 8-like
530,gene12176,0,0,-0.664303,4.341714,0.673158,3.756674,2.247787,0.133806,0.863321,4,0.588075126,red,gene12176,uncharacterized protein LOC111126378 isoform X1
531,gene12181,0,0,-1.796033,4.052113,-0.148705,3.572775,0.063557,0.800959,0.990566,3,0.391914845,yellow,gene12181,innexin unc-9-like isoform X1
532,gene12185,0.000183,0.000412,-0.380227,0.236,-0.56445,4.846266,2.638978,0.104271,0.83528,7,0.579042872,red,gene12185,LOW QUALITY PROTEIN: protein phosphatase 2C-like domain-containing protein 1
533,gene12186,0.24852,0.242637,0.40065,2.413675,-0.352578,6.788115,0.990581,0.3196,0.93226,10,0.820489973,blue,gene12186,EF-hand domain-containing family member B-like
534,gene12187,0,0,-4.991884,77.604553,-0.044606,7.547948,0.031989,0.858052,0.993125,10,0.372269199,blue,gene12187,ras-related protein Rab-5B-like
535,gene12188,0.257494,0.202889,-1.04454,32.912697,0.200428,5.786895,0.516875,0.472178,0.956254,8,0.453037618,pink,gene12188,oxysterol-binding protein-related protein 6-like isoform X1
536,gene12189,0.010315,0.015691,1.46387,22.856996,-0.373744,5.44572,1.64107,0.200179,0.902368,8,0.340879707,green,gene12189,WW domain-containing adapter protein with coiled-coil-like
537,gene1219,0.424303,0.352568,0.327542,0.358049,0.619042,3.125751,1.525614,0.216772,0.910473,2,0.299183149,turquoise,gene1219,LOW QUALITY PROTEIN: 15-hydroxyprostaglandin dehydrogenase
538,gene12190,0.001341,0.002669,-0.825212,1.446844,0.112947,5.121028,0.147446,0.700988,0.985024,7,0.681542492,green,gene12190,LOW QUALITY PROTEIN: dystonin-like
539,gene12191,0.495945,0.296952,-0.689765,32.057937,0.716317,5.295517,2.199678,0.13804,0.863728,8,0.315666095,purple,gene12191,fibrocystin-L-like isoform X1
540,gene12195,0.027972,0.041561,-0.869944,28.435465,0.199362,4.90223,0.248259,0.618304,0.978657,7,0.056126912,turquoise,gene12195,probable serine/threonine-protein kinase DDB_G0267686 isoform X1
541,gene12197,0.00211,0.003852,-0.194715,49.225956,0.241947,5.672156,0.328929,0.566291,0.975073,8,0.855586408,turquoise,gene12197,nuclear receptor subfamily 1 group I member 2-like isoform X1
542,gene1220,0.590893,0.438419,-0.25225,0.289205,-0.341932,4.568997,0.36636,0.544995,0.969301,6,0.09799478,turquoise,gene1220,uncharacterize lncRNA
543,gene12205,0.023016,0.035113,0.249139,0.461221,0.18657,4.129437,0.047183,0.82804,0.992241,5,0.811536959,turquoise,gene12205,cholecystokinin receptor-like
544,gene12210,0.000973,0.001977,1.014201,4.543059,-0.104656,5.848022,0.110859,0.739168,0.987397,9,0.380466893,turquoise,gene12210,LOW QUALITY PROTEIN: GTPase-activating protein and VPS9 domain-containing protein 1-like
545,gene12211,0.000185,0.000416,2.177991,37.814984,-0.327158,5.585034,0.569136,0.450603,0.956091,8,0.184683397,brown,gene12211,LOW QUALITY PROTEIN: TNF receptor-associated factor 2-like
546,gene12215,1.00E-04,0.000224,-6.574823,20.481392,-0.12863,5.031656,0.153859,0.694875,0.984396,7,0.344003724,brown,gene12215,LOW QUALITY PROTEIN: ATP-binding cassette sub-family E member 1-like
547,gene12222,0,0,-2.575078,27.90574,-0.152601,6.117805,0.20688,0.649224,0.981108,9,0.246313337,blue,gene12222,LOW QUALITY PROTEIN: uncharacterized protein LOC111123197
548,gene12226,0.015951,0.025451,5.344377,32.289427,-0.073715,6.731156,0.048232,0.826168,0.992241,10,0.789710748,blue,gene12226,tetratricopeptide repeat protein 25-like isoform X1
549,gene12228,0.002042,0.003949,-1.577471,87.681387,0.411603,4.476395,1.218234,0.269708,0.927721,6,0.33952295,black,gene12228,histone-lysine N-methyltransferase EZH2-like isoform X1
550,gene1223,0.274046,0.209136,-2.1525,2.954037,-0.218978,3.744761,0.074985,0.784212,0.988825,4,0.7299628,turquoise,gene1223,VWFA and cache domain-containing protein 1-like
551,gene1224,0.441388,0.308618,-0.187081,4.655458,0.157925,4.096781,0.037362,0.846729,0.992331,5,0.471539357,turquoise,gene1224,VWFA and cache domain-containing protein 1-like isoform X1
552,gene12245,0.241594,0.237896,0.481755,3.105348,0.167745,8.083927,0.371174,0.542365,0.969301,10,0.60877661,pink,gene12245,uncharacterized protein LOC111125372 isoform X1
553,gene1225,0.170233,0.182516,-0.858549,4.217195,-0.372931,5.088659,0.54726,0.459439,0.956091,7,0.363656717,red,gene1225,bone morphogenetic protein 1-like
554,gene12252,0.414764,0.347224,-1.459721,11.679445,-1.095305,4.982662,5.371809,0.020465,0.581167,7,0.143005236,turquoise,gene12252,polypeptide N-acetylgalactosaminyltransferase 5-like
555,gene12254,0.997018,0.595367,0.004555,7.333962,-0.034688,6.024829,0.01154,0.914454,0.993796,9,0.184054701,turquoise,gene12254,HRAS-like suppressor 2
556,gene12275,0.615846,0.380725,6.038727,15.621396,-0.296323,3.272527,0.215328,0.642623,0.981108,3,0.413382811,yellow,gene12275,large neutral amino acids transporter small subunit 2-like isoform X1
557,gene1228,0.161041,0.136875,-4.871556,13.808811,-0.264665,4.238773,0.278856,0.597452,0.978657,5,0.594195176,turquoise,gene1228,SH3 and cysteine-rich domain-containing protein 2-like isoform X1
558,gene1230,0.488965,0.294746,20.928371,61.918979,-0.034858,6.693954,0.016094,0.899048,0.993796,9,0.287649651,turquoise,gene1230,LOW QUALITY PROTEIN: vinculin-like
559,gene12304,0.00851,0.013475,0.01502,9.689022,0.329452,4.499325,0.630546,0.427155,0.951191,6,0.094330257,blue,gene12304,sushi domain-containing protein 2-like
560,gene12320,0.764558,0.513234,0.026492,0.357695,-0.086914,3.620052,0.008019,0.928647,0.993796,4,0.844316503,turquoise,gene12320,cathepsin L1-like isoform X1
561,gene12334,0.697634,0.486187,0.533567,8.200238,0.912774,3.787358,3.051591,0.080658,0.804286,4,0.661571168,black,gene12334,heat shock 70 kDa protein 12A-like
562,gene12337,0.001497,0.002959,-4.1466,68.758332,-0.10111,7.0287,0.107524,0.742981,0.987969,10,0.59504296,brown,gene12337,uncharacterized protein LOC111125747
563,gene12341,0,0,20.474334,32.949882,-0.601475,4.774196,2.967157,0.084971,0.811075,6,0.216100804,turquoise,gene12341,LOW QUALITY PROTEIN: tudor domain-containing protein 3-like
564,gene12342,0.003351,0.005915,3.970477,21.528143,-0.568217,6.136326,2.414353,0.120228,0.85134,9,0.335622117,turquoise,gene12342,LOW QUALITY PROTEIN: protein diaphanous homolog 2-like
565,gene12343,0.227947,0.160074,4.092159,12.551439,0.423684,5.470857,1.398829,0.23692,0.916485,8,0.263054708,turquoise,gene12343,LOW QUALITY PROTEIN: protein diaphanous homolog 1-like
566,gene12347,0.208948,0.186416,5.584632,73.373033,0.054705,5.511328,0.028969,0.86485,0.993796,8,0.349382059,red,gene12347,kinesin-associated protein 3-like isoform X1
567,gene12348,0,0,-7.750866,26.658663,-0.23794,6.122868,0.84666,0.357499,0.93226,9,0.627442694,purple,gene12348,transient receptor potential cation channel subfamily V member 5-like isoform X1
568,gene12350,0,0,-3.638726,23.454754,-0.000718,3.404368,7.00E-06,0.99789,0.999704,3,0.328268905,green,gene12350,LOW QUALITY PROTEIN: protein unc-80 homolog
569,gene12352,0.014713,0.023693,-0.074584,1.078626,-0.577087,5.657424,2.986146,0.08398,0.811075,8,0.438761922,blue,gene12352,uncharacterized protein LOC111125831
570,gene12358,5.60E-05,0.000133,-3.657794,42.748901,0.251548,4.488962,0.490627,0.483648,0.959087,6,0.25210497,turquoise,gene12358,LOW QUALITY PROTEIN: procollagen galactosyltransferase 1-like
571,gene12362,0.275059,0.217412,0.287572,0.438038,1.16973,10.892446,5.231204,0.022185,0.597712,10,0.823486064,black,gene12362,mucin-2-like
572,gene12366,0.065214,0.085096,-1.531595,7.030814,0.069995,6.17353,0.070926,0.789993,0.989195,9,0.601020855,purple,gene12366,LOW QUALITY PROTEIN: trafficking kinesin-binding protein 1-like
573,gene12367,0.003865,0.007115,1.297828,24.072108,-0.464341,3.642834,0.418098,0.517887,0.965262,4,0.560841244,turquoise,gene12367,LOW QUALITY PROTEIN: neurobeachin-like protein 1
574,gene1237,0.256261,0.248002,-2.485117,6.008418,0.510293,6.45601,2.261355,0.132638,0.863321,9,0.650795374,black,gene1237,sorting and assembly machinery component 50 homolog
575,gene12389,0.790622,0.523284,-0.30032,78.153746,-0.278886,3.828201,0.234737,0.628033,0.980774,4,0.296258344,blue,gene12389,ribonucleoside-diphosphate reductase large subunit-like
576,gene12398,0.220135,0.22206,3.021849,17.774622,0.069269,5.256527,0.02965,0.863286,0.993796,8,0.158718615,turquoise,gene12398,"arginine--tRNA ligase, cytoplasmic-like"
577,gene12405,0.649541,0.449599,-0.236363,4.739509,0.403506,3.783687,0.469731,0.493111,0.960128,4,0.423221106,blue,gene12405,uncharacterized protein LOC111126600
578,gene12423,0.327172,0.233541,2.683674,66.357631,0.426883,3.101638,0.573826,0.448743,0.956091,2,0.098919721,turquoise,gene12423,uncharacterized protein LOC111123576 isoform X2
579,gene12426,0,0,2.681242,75.30733,-1.13576,3.783617,3.923183,0.047625,0.72535,4,0.1273863,turquoise,gene12426,E3 SUMO-protein ligase RanBP2-like isoform X1
580,gene12430,0.471814,0.297763,0.051676,0.877884,-0.18087,4.822521,0.2168,0.641489,0.981108,7,0.206864749,turquoise,gene12430,CAP-Gly domain-containing linker protein 1-like isoform X1
581,gene12438,0.348257,0.246205,-1.419312,44.868194,0.034466,4.242373,0.008748,0.92548,0.993796,5,0.270369493,black,gene12438,nuclear factor related to kappa-B-binding protein-like
582,gene12442,0.094365,0.077443,-1.794497,22.157366,0.073239,3.156953,0.019657,0.888499,0.993796,2,0.17991323,turquoise,gene12442,phospholipid-transporting ATPase IA-like isoform X13
583,gene12445,0.321858,0.195216,12.641498,34.15892,0.617988,3.911055,2.238682,0.134596,0.863321,4,0.247887265,turquoise,gene12445,DNA repair protein RAD50-like isoform X1
584,gene12458,0,0,7.014014,19.431774,-0.003386,4.445907,4.20E-05,0.994849,0.999244,6,0.380580363,brown,gene12458,uncharacterized protein LOC111125126
585,gene1246,0,1.00E-06,9.754436,39.026588,0.007771,6.236502,0.001213,0.972212,0.998341,9,0.620343239,green,gene1246,LOW QUALITY PROTEIN: protein argonaute-2-like
586,gene12477,0,0,0.474378,63.85602,-0.387096,3.906402,0.240805,0.623625,0.979812,4,0.143282971,blue,gene12477,poly
587,gene1248,0.001348,0.002553,2.636245,36.092909,0.021742,3.293549,0.001852,0.965675,0.997988,3,0.216454796,turquoise,gene1248,uncharacterized protein LOC111123848
588,gene12480,0.81913,0.534372,0.089617,3.305294,-0.973101,4.292409,1.927034,0.165083,0.887086,5,0.82674329,turquoise,gene12480,sodium- and chloride-dependent glycine transporter 1-like isoform X1
589,gene12490,0.201826,0.207935,0.188716,0.998958,-0.754324,3.410678,1.432541,0.23135,0.916332,3,0.174722683,turquoise,gene12490,sodium- and chloride-dependent glycine transporter 1-like
590,gene12491,0,0,12.38765,59.200532,-0.665155,5.281166,1.193182,0.274689,0.928733,8,0.08365591,turquoise,gene12491,sodium- and chloride-dependent glycine transporter 1-like
591,gene12518,0.003451,0.005497,-4.161012,22.813345,0.463312,4.585084,0.452744,0.501035,0.960381,6,0.663210605,turquoise,gene12518,uncharacterized protein KIAA1109-like isoform X1
592,gene12525,0.060032,0.069104,-6.807949,17.666371,0.639033,4.41825,1.785446,0.181482,0.893782,6,0.387428874,blue,gene12525,DNA repair protein RAD50-like isoform X1
593,gene12527,0.000207,0.000445,-7.513139,40.837829,-0.457157,4.022158,0.808704,0.368504,0.937803,5,0.134651581,turquoise,gene12527,exosome complex component RRP45-like isoform X1
594,gene12530,0,0,-8.532563,74.516824,-0.107343,4.547493,0.044319,0.833261,0.992241,6,0.242690736,blue,gene12530,histone deacetylase complex subunit SAP30 homolog isoform X1
595,gene12532,0.05397,0.061881,2.10282,47.006393,-0.412838,3.08031,0.481008,0.487966,0.959339,2,0.150399786,turquoise,gene12532,nuclear factor related to kappa-B-binding protein-like isoform X1
596,gene12539,0.231591,0.230583,0.139064,0.581126,-1.058218,4.073245,3.423005,0.064294,0.772093,5,0.099367662,turquoise,gene12539,hyaluronan mediated motility receptor-like isoform X1
597,gene12544,0,0,5.377781,62.149973,0.974456,4.209404,2.414994,0.120178,0.85134,5,0.460453328,green,gene12544,E3 SUMO-protein ligase RanBP2-like
598,gene1255,0.478233,0.382316,-0.411688,1.44946,-0.214002,4.349874,0.165871,0.683808,0.98412,5,0.52679383,black,gene1255,PDZ and LIM domain protein 1-like
599,gene12564,0.313005,0.248295,1.359791,3.107775,0.480836,5.327904,1.532153,0.21579,0.90979,8,0.468866363,yellow,gene12564,signal transducer and activator of transcription 1-like isoform X1
600,gene12581,0,0,5.337573,86.79513,0.310658,6.374165,1.152039,0.283123,0.928733,9,0.810407798,yellow,gene12581,SWI/SNF-related matrix-associated actin-dependent regulator of chromatin subfamily A member 5-like isoform X1
601,gene126,0.349321,0.223653,1.751314,21.659171,0.202531,4.983256,0.118512,0.730654,0.986801,7,0.627094985,turquoise,gene126,origin recognition complex subunit 4-like isoform X1
602,gene12615,0.600411,0.376308,0.450107,0.77724,-0.061573,3.485643,0.011593,0.914255,0.993796,3,0.456089739,blue,gene12615,golgin subfamily A member 6-like protein 22 isoform X1
603,gene12617,0.058122,0.077486,2.900473,46.060088,-0.45712,3.428959,0.699218,0.403046,0.944652,3,0.270245996,brown,gene12617,protein YIPF5-like
604,gene12632,0.342891,0.305335,1.773077,71.808889,-1.456885,4.874642,3.157641,0.075572,0.787597,7,0.10155133,turquoise,gene12632,60S ribosomal protein L9-like
605,gene12667,0,0,12.157007,81.255293,-0.63112,4.516423,2.359759,0.124501,0.856387,6,0.092140847,turquoise,gene12667,SWI/SNF-related matrix-associated actin-dependent regulator of chromatin subfamily A member 5-like
606,gene12668,0,0,2.537853,3.364792,-0.159509,4.356552,0.068651,0.793311,0.989822,5,0.532375882,turquoise,gene12668,ubiquitin-protein ligase E3A-like
607,gene1267,0.001178,0.002363,-5.437938,31.844942,0.102261,4.694865,0.106226,0.744483,0.987969,6,0.348189499,turquoise,gene1267,putative homeodomain transcription factor 2 isoform X1
608,gene1268,0.309302,0.227219,-1.547105,67.528896,0.018308,3.680447,0.001601,0.968085,0.998341,4,0.571677154,red,gene1268,membrane-bound O-acyltransferase domain-containing protein 2-like
609,gene12682,0.089915,0.085799,0.678967,53.774119,0.430221,4.329968,0.728951,0.393223,0.941854,5,0.448116476,black,gene12682,signal transducer and activator of transcription 5B-like
610,gene12685,0.052695,0.062991,-1.343704,21.295639,0.639107,5.309888,2.518284,0.112533,0.840276,8,0.668712448,pink,gene12685,signal transducer and activator of transcription 1-like isoform X1
611,gene12688,0.707624,0.490345,-0.524612,7.030637,0.950719,3.588143,4.064413,0.043796,0.710471,4,0.302406044,brown,gene12688,"ribosome-recycling factor, mitochondrial-like"
612,gene12689,1.40E-05,3.50E-05,18.181608,31.261342,0.992171,3.507919,3.383523,0.065851,0.772371,3,0.34363326,turquoise,gene12689,serine/threonine-protein phosphatase 2A activator-like isoform X1
613,gene12702,0.393802,0.335104,-0.054034,0.201307,-0.687601,5.418788,2.35898,0.124564,0.856387,8,0.180072837,yellow,gene12702,uncharacterized protein LOC111125713
614,gene12708,0.100886,0.103952,-10.574936,39.041007,-0.082888,6.127933,0.093128,0.760237,0.987969,9,0.506360194,turquoise,gene12708,"LOW QUALITY PROTEIN: alpha-1,6-mannosylglycoprotein 6-beta-N-acetylglucosaminyltransferase A-like"
615,gene12711,0.363543,0.317625,0.40733,1.357475,0.001809,3.230211,0,0.99974,0.999953,3,0.409559905,red,gene12711,LOW QUALITY PROTEIN: protein inturned-like
616,gene1272,0.212458,0.170361,0.572753,6.543367,0.359996,4.626582,0.24659,0.619486,0.978907,6,0.748471265,turquoise,gene1272,"N-acetyllactosaminide beta-1,6-N-acetylglucosaminyl-transferase-like isoform X1"
617,gene12748,0,0,19.78116,35.162334,-0.73138,3.918764,0.804438,0.36977,0.937803,4,0.848422191,turquoise,gene12748,kinase D-interacting substrate of 220 kDa-like
618,gene12749,0,0,-4.185615,7.76274,-0.650208,4.071551,1.62928,0.201803,0.904123,5,0.394410633,blue,gene12749,uncharacterized protein LOC111125365 isoform X1
619,gene12759,0.136579,0.130785,-0.571343,8.286988,0.436858,4.475746,0.326744,0.567583,0.975293,6,0.646727698,green,gene12759,uncharacterized protein LOC111126399 isoform X1
620,gene12762,0.165265,0.130466,2.684802,19.700603,-0.226929,5.596889,0.077007,0.781395,0.988371,8,0.805567169,turquoise,gene12762,B-cell receptor CD22-like isoform X1
621,gene12778,0.228708,0.173332,1.674045,10.020728,-1.452848,6.008694,2.030771,0.154142,0.879035,9,0.143796037,turquoise,gene12778,uncharacterized protein LOC111126069
622,gene12796,2.00E-06,5.00E-06,6.833206,62.202918,0.435399,4.067256,0.886659,0.346384,0.93226,5,0.403198397,green,gene12796,LOW QUALITY PROTEIN: TFIIH basal transcription factor complex helicase XPD subunit-like
623,gene12798,0.024842,0.034027,4.255684,42.839277,0.110814,4.790024,0.073039,0.786962,0.988825,6,0.151224093,purple,gene12798,GRAM domain-containing protein 2B-like
624,gene1280,0.001585,0.00312,2.196387,6.822075,-0.759751,4.322198,0.492007,0.483033,0.959087,5,0.676059826,turquoise,gene1280,mucin-like protein
625,gene12807,0.372984,0.320147,0.258971,0.321952,-0.41315,5.342296,0.29257,0.588579,0.978657,8,0.492523271,red,gene12807,uncharacterized protein LOC111128217
626,gene12812,0.068266,0.077095,-0.406493,1.519494,0.093757,4.603965,0.028988,0.864806,0.993796,6,0.43458302,yellow,gene12812,calcium-binding protein LPS1-alpha-like
627,gene12821,0.644556,0.462808,-0.357821,7.489395,0.342681,3.122559,0.365519,0.545457,0.969301,2,0.107536704,turquoise,gene12821,casein kinase I-like isoform X1
628,gene12826,0.559076,0.423622,-0.654785,47.479808,-0.235253,4.183505,0.114264,0.73534,0.986959,5,0.480198176,turquoise,gene12826,nucleolar protein 6-like isoform X1
629,gene12839,0.668845,0.473517,-0.315445,8.626545,0.560751,3.755107,0.755985,0.384588,0.93925,4,0.233304649,black,gene12839,alpha-aminoadipic semialdehyde dehydrogenase-like
630,gene12841,0.544657,0.353616,1.092117,11.864179,-1.190648,5.016368,3.671025,0.055366,0.749776,7,0.472789445,turquoise,gene12841,uncharacterized protein LOC111129343 isoform X1
631,gene1285,0.085967,0.089255,0.767668,5.363019,0.518342,5.396194,0.479432,0.48868,0.959339,8,0.784812131,turquoise,gene1285,uncharacterized protein LOC111115873 isoform X1
632,gene12874,0.000572,0.00115,2.420204,9.085897,-0.050599,5.249653,0.023437,0.878326,0.993796,8,0.489822608,green,gene12874,cyclin-dependent kinase-like 1 isoform X1
633,gene12875,0.571832,0.407789,-0.648204,3.977269,0.469317,4.973593,1.589037,0.207464,0.90532,7,0.56850587,turquoise,gene12875,LOW QUALITY PROTEIN: mitogen-activated protein kinase kinase kinase kinase 3-like
634,gene12880,0.036753,0.052644,0.12433,0.339605,0.076868,3.606938,0.009749,0.921346,0.993796,4,0.159416746,turquoise,gene12880,LOW QUALITY PROTEIN: ADAMTS-like protein 1
635,gene12888,0.211702,0.20599,-0.505207,3.946861,0.079446,5.425664,0.030075,0.86232,0.993745,8,0.581453241,turquoise,gene12888,uncharacterized protein LOC111130061
636,gene12889,0.113214,0.121638,0.356513,0.327013,-0.983034,3.43583,1.882443,0.170057,0.888303,3,0.762786108,red,gene12889,limbic system-associated membrane protein-like
637,gene12891,0.039142,0.045642,-2.593678,58.253509,0.511765,5.772946,0.994025,0.318761,0.93226,8,0.571420401,red,gene12891,uncharacterized protein LOC111129277 isoform X1
638,gene12898,0,0,4.547673,66.702554,-1.750854,4.217324,4.75167,0.02927,0.648676,5,0.400851823,turquoise,gene12898,LOW QUALITY PROTEIN: breast cancer type 2 susceptibility protein homolog
639,gene12903,0.082047,0.079341,0.338696,19.707299,-0.271682,5.989284,1.234833,0.266469,0.925548,9,0.571776062,green,gene12903,LOW QUALITY PROTEIN: transducin-like enhancer protein 4
640,gene12904,0.46562,0.325567,0.090542,32.379739,0.429052,7.526311,1.275021,0.258827,0.924946,10,0.698167254,black,gene12904,LOW QUALITY PROTEIN: protein SMG5-like
641,gene12905,0.264941,0.185878,0.681739,25.003792,-0.052386,6.780779,0.034095,0.853506,0.993016,10,0.502043367,green,gene12905,LOW QUALITY PROTEIN: semaphorin-1A-like
642,gene12906,0.234785,0.188929,-3.984615,4.382628,0.147366,5.310661,0.131612,0.716766,0.98622,8,0.469445112,yellow,gene12906,COMM domain-containing protein 10-like
643,gene12910,0.007311,0.01105,1.143314,28.273434,1.243979,4.948009,4.357021,0.036857,0.693689,7,0.617706798,turquoise,gene12910,uncharacterized protein LOC111128477 isoform X1
644,gene12914,0,0,4.093431,39.096988,0.446406,4.624842,1.316162,0.251282,0.921675,6,-0.006539882,turquoise,gene12914,LOW QUALITY PROTEIN: 3-hydroxy-3-methylglutaryl-coenzyme A reductase-like
645,gene12916,0.313078,0.233853,1.822541,31.10193,0.164877,6.287308,0.320594,0.571251,0.976289,9,0.586267321,turquoise,gene12916,LOW QUALITY PROTEIN: unconventional myosin-IXb-like
646,gene12917,0.263722,0.203911,-5.426412,47.83587,-0.251031,6.00647,0.483501,0.486841,0.959339,9,0.354648379,pink,gene12917,LOW QUALITY PROTEIN: tumor necrosis factor alpha-induced protein 8-like
647,gene12920,0.091092,0.111709,0.547306,0.432284,0.425267,7.702239,0.570007,0.450256,0.956091,10,0.935404842,black,gene12920,LOW QUALITY PROTEIN: F-box/WD repeat-containing protein 5-like
648,gene12921,0,0,12.017212,23.078561,0.440308,6.383668,0.315193,0.574511,0.976289,9,0.126722975,red,gene12921,neuronal acetylcholine receptor subunit alpha-10-like
649,gene12931,1.00E-05,2.50E-05,2.152829,29.066706,-0.263736,5.770235,0.95511,0.328422,0.93226,8,0.357155612,turquoise,gene12931,LOW QUALITY PROTEIN: protein AF-9-like
650,gene12938,0.118753,0.109505,-0.665074,2.0986,0.018682,4.178097,0.001056,0.974074,0.998341,5,0.568392684,green,gene12938,macrophage mannose receptor 1-like
651,gene12941,0.259594,0.203899,1.786087,32.023079,0.057595,5.182963,0.024117,0.876586,0.993796,7,0.581533863,yellow,gene12941,putative E3 ubiquitin-protein ligase UBR7
652,gene12944,3.70E-05,9.00E-05,-6.851434,75.959089,0.531332,5.491505,2.855476,0.091063,0.818998,8,0.50899955,green,gene12944,activator of 90 kDa heat shock protein ATPase homolog 1-like
653,gene12953,0.0012,0.002404,2.492255,68.533872,0.090459,3.352746,0.020146,0.88713,0.993796,3,0.498115305,green,gene12953,apoptosis-resistant E3 ubiquitin protein ligase 1-like
654,gene12954,0.557504,0.422838,0.341193,2.126891,-0.081775,3.843641,0.041916,0.837781,0.992241,4,0.153454616,turquoise,gene12954,tubulin-specific chaperone E-like
655,gene12959,0.494214,0.390794,-0.371833,3.152015,-1.29309,5.081903,6.477556,0.010925,0.504001,7,0.283220289,turquoise,gene12959,uncharacterized protein LOC111130957
656,gene12960,0.662687,0.470671,-0.979978,67.715492,-0.050021,4.635273,0.011324,0.915255,0.993796,6,0.55914317,blue,gene12960,DNA replication licensing factor mcm5-like
657,gene12965,0.294765,0.225203,-0.209057,0.615899,-0.675992,5.477919,2.541498,0.11089,0.840276,8,0.330495849,red,gene12965,potassium voltage-gated channel protein Shaw-like
658,gene12966,0.053889,0.072789,-2.580275,8.610692,-0.483526,3.699015,0.739058,0.389963,0.940603,4,0.201828343,turquoise,gene12966,guanine nucleotide exchange protein SMCR8-like
659,gene12972,0.091879,0.087156,4.29937,16.376949,0.195739,4.633094,0.087514,0.767361,0.987969,6,0.433614195,turquoise,gene12972,sacsin-like isoform X1
660,gene12974,0,0,-16.642145,4.228497,-1.365153,3.863456,3.370306,0.066381,0.775369,4,0.012835761,turquoise,gene12974,uncharacterized protein LOC111129982
661,gene12978,0.243678,0.163396,-0.755391,26.59639,0.529183,5.222994,1.902327,0.167818,0.888303,7,0.264048611,yellow,gene12978,protein NRDE2 homolog
662,gene12980,1.00E-06,3.00E-06,0.900323,78.03224,-0.044903,5.63589,0.028972,0.864844,0.993796,8,0.337639203,turquoise,gene12980,LOW QUALITY PROTEIN: son of sevenless homolog 2-like
663,gene12983,0.832129,0.53678,0.017879,0.73034,-0.378585,5.686689,0.990902,0.319522,0.93226,8,0.771338673,blue,gene12983,proteoglycan 4-like isoform X3
664,gene12985,0.127783,0.146479,-1.43713,1.79896,-0.484234,5.089865,0.924055,0.336413,0.93226,7,0.024594638,turquoise,gene12985,peptidyl-glycine alpha-amidating monooxygenase B-like
665,gene1299,2.60E-05,6.40E-05,5.489987,86.442746,-0.197876,5.823582,0.299769,0.584027,0.977018,8,0.632906943,turquoise,gene1299,E3 ubiquitin-protein ligase UBR5-like isoform X1
666,gene130,0.362817,0.292348,-0.545083,41.479897,-0.18514,3.783628,0.05771,0.810153,0.991391,4,0.835588716,red,gene130,oxysterol-binding protein-related protein 8-like isoform X1
667,gene1300,0.237051,0.189559,0.919642,17.933545,-0.327458,4.804646,0.628051,0.428071,0.951538,7,0.503154317,turquoise,gene1300,solute carrier organic anion transporter family member 4A1-like isoform X1
668,gene13000,0.123464,0.105205,1.015417,22.083623,0.345144,4.761387,0.512321,0.474136,0.957213,6,0.630872753,turquoise,gene13000,autophagy-related protein 2 homolog B-like
669,gene13015,0.842626,0.542537,-0.343309,5.453548,0.811706,4.954436,2.481133,0.115219,0.846381,7,0.460047954,yellow,gene13015,uncharacterized protein LOC111130694
670,gene13059,0.516041,0.343569,1.088644,29.733871,0.2019,6.835072,0.17017,0.679961,0.983547,10,0.530378445,turquoise,gene13059,structural maintenance of chromosomes protein 5-like
671,gene13064,0.382781,0.256828,-5.702304,18.779626,-0.833054,3.907635,2.607291,0.106373,0.83528,4,0.239820586,turquoise,gene13064,repressor of yield of DENV protein homolog
672,gene13066,0.005296,0.008851,-15.636257,50.447525,0.92106,4.564519,5.914274,0.015019,0.537678,6,0.63818414,green,gene13066,protein ABHD17B-like
673,gene13068,0.704769,0.489182,0.410753,6.620915,-0.91507,4.252227,3.173506,0.074842,0.787597,5,0.418114422,brown,gene13068,uncharacterized protein C9orf85 homolog
674,gene13077,0,0,-11.010075,67.405599,0.212694,4.265714,0.081031,0.775905,0.987969,5,0.201071711,blue,gene13077,exocyst complex component 5-like
675,gene13080,0.100509,0.06983,0.559649,63.551895,0.471865,3.190502,0.772564,0.379425,0.939089,2,0.400803082,turquoise,gene13080,dmX-like protein 2 isoform X1
676,gene13082,0.257188,0.222466,-0.005422,6.15416,-0.494191,4.399621,0.769931,0.380238,0.939089,6,0.308521175,turquoise,gene13082,uncharacterized protein LOC111128056 isoform X1
677,gene13083,0.701351,0.487702,-0.07858,0.938436,0.513432,5.302424,0.829525,0.36241,0.933235,8,0.151536069,blue,gene13083,arylsulfatase B-like
678,gene1309,0.175382,0.138632,11.198128,13.721169,0.339515,5.627075,0.459487,0.497864,0.960259,8,0.403454661,turquoise,gene1309,uncharacterized protein LOC111126660 isoform X1
679,gene13097,0.254242,0.246625,0.508903,2.050233,0.199825,5.078174,0.282871,0.594825,0.978657,7,0.515332786,black,gene13097,AT-rich interactive domain-containing protein 3A-like
680,gene131,0.01879,0.027968,-2.476834,63.828673,0.223205,6.688516,0.424896,0.514504,0.964536,9,0.890795872,turquoise,gene131,RNA polymerase-associated protein CTR9 homolog
681,gene13100,0.126115,0.124372,2.842611,27.912789,0.331939,6.976157,0.938674,0.332619,0.93226,10,0.573170079,turquoise,gene13100,"pyruvate carboxylase, mitochondrial-like isoform X1"
682,gene13110,0.704768,0.489182,0.01391,0.312933,-0.937871,6.018106,1.02637,0.311013,0.93226,9,0.50295686,magenta,gene13110,uncharacterize lncRNA
683,gene13115,0,0,-6.971338,82.216596,0.014698,7.718441,0.001267,0.971608,0.998341,10,0.184284655,magenta,gene13115,RNA-binding protein PNO1-like
684,gene13117,0.320026,0.240501,0.647736,13.577642,0.580982,4.687684,1.03314,0.309422,0.93226,6,0.663570248,turquoise,gene13117,autophagy-related protein 2 homolog B-like
685,gene13130,0.088648,0.102846,0.501638,22.42777,0.037333,7.893019,0.027001,0.86948,0.993796,10,0.68403752,turquoise,gene13130,LOW QUALITY PROTEIN: fermitin family homolog 2-like
686,gene13131,0.657036,0.468241,0.595322,15.051625,-1.057717,4.469456,7.482768,0.006229,0.421159,6,0.276210566,turquoise,gene13131,LOW QUALITY PROTEIN: tetratricopeptide repeat protein 8-like
687,gene13134,0.018743,0.029377,4.41272,68.028012,0.114435,3.64052,0.048568,0.825574,0.992241,4,0.282677734,red,gene13134,WD repeat-containing protein 26-like
688,gene13144,0.156028,0.170917,-0.25716,0.737944,0.319213,3.330117,0.356214,0.550616,0.970998,3,0.306908986,turquoise,gene13144,uncharacterized protein LOC111131279 isoform X1
689,gene13147,0.525573,0.348579,-0.015616,1.634252,0.449908,3.774974,0.47285,0.491679,0.959914,4,0.395895078,turquoise,gene13147,kelch-like protein 9
690,gene13151,0,0,-18.40147,23.68634,0.164786,5.183432,0.072081,0.78833,0.989125,7,0.363606905,yellow,gene13151,"dynein light chain 1, axonemal-like"
691,gene13154,0.094531,0.092368,-14.906776,47.434787,-1.146025,3.665682,4.134623,0.042014,0.700527,4,0.215254558,purple,gene13154,atlastin-2-like isoform X1
692,gene13166,0.418075,0.303357,-1.579589,0.727063,-0.809643,4.287485,1.129425,0.287898,0.928733,5,0.716404392,turquoise,gene13166,uncharacterized protein LOC111128325
693,gene13168,0.000842,0.001666,3.646808,72.853905,-0.409031,3.428216,0.52532,0.468581,0.956091,3,-0.088066148,turquoise,gene13168,TAF6-like RNA polymerase II p300/CBP-associated factor-associated factor 65 kDa subunit 6L
694,gene13184,0.38488,0.330107,-0.093425,0.451696,-0.842984,3.686002,0.730258,0.3928,0.941844,4,0.704954251,red,gene13184,arylsulfatase B-like
695,gene13185,0.643848,0.462585,0.254357,4.56114,0.143577,3.401185,0.061106,0.804757,0.991016,3,0.18918019,red,gene13185,uncharacterized protein LOC111130654 isoform X1
696,gene13187,0.013706,0.019493,-8.128609,53.041428,-0.370988,4.841154,0.431356,0.511324,0.964299,7,0.840857339,turquoise,gene13187,dmX-like protein 2 isoform X1
697,gene13190,0,0,-2.59756,1.734936,-0.019375,3.581593,0.001072,0.973879,0.998341,3,0.331362535,blue,gene13190,exocyst complex component 5-like
698,gene13206,4.50E-05,0.000106,5.121449,67.340718,-0.05925,5.464237,0.014974,0.902607,0.993796,8,0.74028674,turquoise,gene13206,structural maintenance of chromosomes protein 5-like
699,gene13217,0.195695,0.203167,-0.126779,0.186191,-0.61584,7.421269,0.545105,0.460325,0.956091,10,0.183574543,turquoise,gene13217,serine-arginine protein 55-like isoform X4
700,gene13239,0.008704,0.014839,-1.970079,9.616336,-0.107243,4.544629,0.054189,0.815929,0.992241,6,0.247282491,blue,gene13239,SHC-transforming protein 1-like isoform X1
701,gene1325,0,0,-11.928723,48.538513,0.216584,4.440189,0.140077,0.708204,0.985478,6,0.100672216,blue,gene1325,acetolactate synthase-like protein
702,gene13255,0.037087,0.047162,-1.426036,25.484595,0.386781,6.096225,1.706045,0.191499,0.89842,9,0.784001288,green,gene13255,"spectrin alpha chain, non-erythrocytic 1-like isoform X1"
703,gene13259,0.024992,0.035242,2.171954,17.809802,0.021416,3.377282,0.001656,0.967539,0.998341,3,0.496776608,greenyellow,gene13259,"high affinity cAMP-specific and IBMX-insensitive 3\',5\'-cyclic phosphodiesterase 8B-like isoform X1"
704,gene13270,0.772241,0.515673,0.485905,29.700319,-0.205519,5.05729,0.194406,0.659275,0.982155,7,0.582498013,turquoise,gene13270,"spectrin alpha chain, non-erythrocytic 1-like isoform X1"
705,gene13278,0,0,5.886114,85.120096,-0.072763,3.175686,0.013225,0.908445,0.993796,2,0.310101985,black,gene13278,PR domain zinc finger protein 5-like
706,gene13281,0.158924,0.130368,4.228301,39.671898,0.412156,9.111514,1.32557,0.249595,0.921675,10,0.851554914,black,gene13281,LOW QUALITY PROTEIN: sodium channel protein 1 brain-like
707,gene13286,0.471935,0.351375,-0.094816,0.371955,0.398764,4.562612,0.496645,0.480978,0.959052,6,0.744570118,turquoise,gene13286,synaptotagmin-4-like
708,gene13287,0.391188,0.289708,-0.446322,7.048439,-0.738407,4.190054,3.406265,0.064949,0.772093,5,0.269414417,turquoise,gene13287,"LOW QUALITY PROTEIN: lon protease homolog, mitochondrial-like"
709,gene13294,0.289777,0.207236,-0.800948,3.153382,0.357694,6.368376,0.383454,0.53576,0.967596,9,0.274190828,brown,gene13294,LOW QUALITY PROTEIN: protein fem-1 homolog B-like
710,gene13297,0.234388,0.182445,3.519571,19.204664,-0.54715,5.941106,2.941168,0.086348,0.814114,9,0.403831476,turquoise,gene13297,arrestin domain-containing protein 17-like
711,gene13338,0.114128,0.103235,-2.159206,13.395604,0.228197,6.453278,0.781408,0.376711,0.939089,9,0.707700269,green,gene13338,uncharacterized protein LOC111129339 isoform X1
712,gene13343,0.265803,0.181004,-0.733986,25.059845,1.347891,5.324129,6.251371,0.01241,0.518081,8,0.259386733,turquoise,gene13343,LOW QUALITY PROTEIN: circularly permutated Ras protein 1-like
713,gene13347,0.164038,0.116963,-2.840155,25.918643,0.514203,4.55537,0.478854,0.488942,0.959339,6,0.723048777,turquoise,gene13347,LOW QUALITY PROTEIN: protein unc-79 homolog
714,gene13348,0.037696,0.036604,1.4505,41.314579,0.734892,8.184063,3.694731,0.054585,0.748988,10,0.869416587,black,gene13348,regulator of G-protein signaling 7-like isoform X1
715,gene13353,0.002769,0.005232,4.085041,76.765721,-0.084726,4.103957,0.04057,0.84037,0.992241,5,0.29244938,brown,gene13353,"atypical kinase COQ8B, mitochondrial-like"
716,gene13354,0.22934,0.180521,0.746148,3.454774,0.077439,7.522271,0.112402,0.737426,0.987329,10,0.489530277,blue,gene13354,RNA-binding protein Nova-1-like isoform X1
717,gene13364,0.889189,0.559404,-0.143731,7.998226,-0.412674,4.298676,0.369421,0.54332,0.969301,5,0.393082292,turquoise,gene13364,fibropellin-1-like
718,gene13380,0,0,6.964684,81.173206,-0.668855,4.071856,1.546298,0.213683,0.908487,5,0.62095622,turquoise,gene13380,kinesin-like protein KIF16B isoform X1
719,gene134,0.009089,0.015432,-0.071795,0.369279,-0.904899,5.140615,2.459611,0.116808,0.847813,7,0.578247794,red,gene134,protocadherin-like wing polarity protein stan isoform X1
720,gene13402,0,0,5.456408,70.728693,0.065525,6.124529,0.059949,0.806577,0.991016,9,0.445172215,pink,gene13402,forkhead box protein N3-like
721,gene13405,0.000309,0.000646,0.28233,69.962233,-0.629013,5.066795,2.529253,0.111753,0.840276,7,0.24700864,yellow,gene13405,LOW QUALITY PROTEIN: golgin subfamily A member 5-like
722,gene13408,0.637242,0.457293,0.145846,0.296317,-0.172667,6.548699,0.324224,0.56908,0.975293,9,0.455705999,purple,gene13408,bone morphogenetic protein 2-like
723,gene13409,0.173216,0.166885,0.506891,12.219572,-0.040649,6.553387,0.01553,0.900825,0.993796,9,0.634797514,turquoise,gene13409,LOW QUALITY PROTEIN: uncharacterized protein LOC111129939
724,gene13411,0.009851,0.016268,2.342333,25.457547,0.498295,8.292541,6.183092,0.012898,0.518081,10,0.623726448,pink,gene13411,LOW QUALITY PROTEIN: alpha-actinin-like
725,gene13416,0.061177,0.080852,-0.981153,0.690232,-0.432064,6.541577,0.441502,0.506398,0.963408,9,0.125470911,turquoise,gene13416,uncharacterized protein LOC111129223
726,gene13417,0.003,0.005633,-2.165208,88.943345,-0.142054,3.847186,0.113258,0.736465,0.987005,4,0.571797536,purple,gene13417,serine/threonine-protein kinase ULK4-like isoform X1
727,gene13418,0,0,10.780779,3.661215,-0.747736,5.006159,4.04692,0.044252,0.713688,7,0.544651065,brown,gene13418,aldose 1-epimerase-like
728,gene13420,0.482079,0.330066,-0.76545,1.090658,-0.431221,4.704201,0.5263,0.468166,0.956091,6,0.364042115,turquoise,gene13420,Acyl-CoA:lysophosphatidylglycerol acyltransferase 1 (EC 2.3.1.-)
729,gene13423,0.25253,0.245458,0.071213,0.290236,-0.524248,4.728981,1.692035,0.193333,0.89842,6,0.078940157,turquoise,gene13423,LOW QUALITY PROTEIN: mortality factor 4-like protein 1
730,gene13431,0.000194,0.000436,0.598252,1.077489,-0.328203,6.2136,0.404661,0.524692,0.967156,9,0.058840888,red,gene13431,LOW QUALITY PROTEIN: neuroendocrine convertase 1-like
731,gene13435,0.358908,0.310085,-0.148887,3.398276,0.003803,6.097597,0.00013,0.990887,0.999244,9,0.535675393,green,gene13435,LOW QUALITY PROTEIN: uncharacterized protein LOC111129872
732,gene13437,0,0,24.014389,68.248263,0.484666,5.01188,1.981817,0.159199,0.884593,7,0.256023236,red,gene13437,LOW QUALITY PROTEIN: F-box only protein 11-like
733,gene13439,0,0,-27.591694,70.533526,-0.006916,4.457887,0.000239,0.987674,0.999244,6,0.312623208,black,gene13439,WD repeat-containing protein 92-like
734,gene13440,0.214466,0.177661,1.467071,42.683238,-0.431621,5.173177,1.245532,0.264408,0.925081,7,-0.065948743,turquoise,gene13440,ribosomal RNA processing protein 36 homolog isoform X1
735,gene13446,0,0,-10.20527,39.344054,0.043179,3.415636,0.006975,0.933443,0.994005,3,0.385848759,turquoise,gene13446,xanthine dehydrogenase/oxidase-like isoform X1
736,gene13451,0.494426,0.296435,1.519332,51.335317,0.03215,5.169371,0.010277,0.919254,0.993796,7,0.063882442,turquoise,gene13451,LOW QUALITY PROTEIN: WD repeat-containing protein 43-like
737,gene13454,0,0,-8.821764,67.169517,0.569768,7.572038,0.852959,0.355717,0.93226,10,0.944688621,black,gene13454,LOW QUALITY PROTEIN: ectonucleoside triphosphate diphosphohydrolase 5-like
738,gene13455,0.238862,0.205726,-1.496099,22.862041,0.330379,5.166246,1.310814,0.252247,0.921675,7,0.284284777,turquoise,gene13455,nuclear receptor ROR-beta-like isoform X1
739,gene13457,0.4747,0.37721,-0.094538,24.753096,0.355109,4.859712,1.086556,0.297236,0.931462,7,0.437146144,turquoise,gene13457,LOW QUALITY PROTEIN: patatin-like phospholipase domain-containing protein 7
740,gene13458,0.119823,0.095603,1.86933,17.856489,-0.512222,5.407369,1.769631,0.183428,0.894518,8,0.235083605,turquoise,gene13458,maleylacetoacetate isomerase-like
741,gene13469,0.528336,0.40823,0.070486,0.125922,0.396068,5.257028,1.078527,0.299027,0.931462,8,0.36755075,pink,gene13469,neudesin-like
742,gene13471,0.292245,0.19303,1.907251,49.991886,-0.162596,7.006532,0.36365,0.546486,0.969301,10,0.508931265,yellow,gene13471,LOW QUALITY PROTEIN: eukaryotic translation initiation factor 5-like
743,gene13474,0.429514,0.281988,-0.242986,0.826319,0.121163,8.451344,0.346808,0.555926,0.973992,10,0.820355593,green,gene13474,LOW QUALITY PROTEIN: spectrin beta chain-like
744,gene13476,0.906185,0.56526,0.125827,52.758797,0.038307,5.041839,0.01375,0.906654,0.993796,7,0.505186579,yellow,gene13476,LOW QUALITY PROTEIN: DDB1- and CUL4-associated factor 5-like
745,gene13477,0.253229,0.208538,-0.414374,1.145388,0.432994,5.382382,0.230975,0.630802,0.980774,8,0.854069813,turquoise,gene13477,uncharacterized protein LOC111128678
746,gene13488,0.450852,0.367868,-1.561005,79.203385,-0.175768,4.041739,0.159857,0.689288,0.98412,5,0.498701285,turquoise,gene13488,beclin 1-associated autophagy-related key regulator-like
747,gene13489,0.154373,0.103221,-5.714059,39.03878,0.045256,6.124503,0.027528,0.868224,0.993796,9,0.626975889,green,gene13489,5\'-AMP-activated protein kinase subunit beta-1-like isoform X1
748,gene13490,0.001557,0.003069,2.203008,3.189607,-1.345788,4.754228,8.787641,0.003033,0.347952,6,0.368404066,magenta,gene13490,uncharacterized protein LOC111127943
749,gene13494,0.0479,0.066033,2.847834,24.828704,0.087929,5.780901,0.065784,0.797577,0.990057,8,0.815837777,blue,gene13494,T-complex-associated testis-expressed protein 1-like
750,gene13495,7.20E-05,0.000164,1.733365,37.080403,-0.530772,3.744443,1.386086,0.239067,0.916485,4,0.40539719,turquoise,gene13495,RNA polymerase II-associated protein 1-like isoform X1
751,gene13496,0.000292,0.000612,6.627413,59.904485,-0.049222,7.065722,0.040276,0.840942,0.992241,10,0.552628894,green,gene13496,LOW QUALITY PROTEIN: TOG array regulator of axonemal microtubules protein 1-like
752,gene13499,0.47521,0.314601,0.414279,62.691467,-0.428182,6.740197,2.634801,0.104545,0.83528,10,0.594857099,purple,gene13499,cilia- and flagella-associated protein 70-like isoform X1
753,gene13504,0,0,7.017968,77.592567,0.07432,5.473301,0.070314,0.79088,0.989195,8,0.465469761,yellow,gene13504,tectonin beta-propeller repeat-containing protein 2-like
754,gene13511,0.751223,0.507786,-0.268081,5.458918,1.46731,5.765225,16.050689,6.20E-05,0.037367,8,0.751498573,pink,gene13511,uncharacterized protein LOC111128066 isoform X1
755,gene1352,0.551646,0.420129,-0.350992,2.498599,-0.08836,5.752254,0.010387,0.918822,0.993796,8,0.944342089,turquoise,gene1352,C-C chemokine receptor type 1-like
756,gene1353,0,0,-4.146853,2.103391,-0.538148,3.946267,1.186638,0.276009,0.928733,4,0.424907342,turquoise,gene1353,tripartite motif-containing protein 2-like
757,gene13531,0.067293,0.087306,0.308593,0.404397,-4.579735,8.590798,6.56032,0.010428,0.494157,10,0.103111813,brown,gene13531,fatty acid-binding protein-like
758,gene13542,0.346366,0.307386,-0.654509,7.53385,-0.218924,5.262629,0.37665,0.539401,0.96884,8,0.415289694,green,gene13542,HHIP-like protein 2 isoform X1
759,gene13547,0.148074,0.10156,-1.183965,49.46684,-0.258559,7.811738,1.461428,0.226703,0.913566,10,0.640224076,green,gene13547,"1-phosphatidylinositol 4,5-bisphosphate phosphodiesterase beta-1-like isoform X1"
760,gene13548,0,0,5.32789,73.085271,0.537365,3.500858,1.528695,0.216308,0.90979,3,0.368474822,red,gene13548,UPF0568 protein C14orf166-like
761,gene13553,0.090213,0.095411,15.437014,16.42508,0.350169,3.3438,0.459944,0.49765,0.960259,3,0.335893071,turquoise,gene13553,spastin-like isoform X1
762,gene13555,0.003711,0.006858,-0.462113,1.696639,0.366844,4.765602,0.3133,0.575662,0.976289,6,0.5140303,turquoise,gene13555,protein stum homolog
763,gene13556,6.20E-05,0.000147,0.514327,0.814247,0.593683,5.925841,3.646617,0.056183,0.753097,9,0.146060705,turquoise,gene13556,uncharacterized protein LOC111130756
764,gene13572,0.349071,0.243196,0.902786,37.761675,0.298569,3.35539,0.312997,0.575847,0.976289,3,0.174852344,black,gene13572,uncharacterized protein LOC111127920
765,gene13573,0.142914,0.114908,0.385875,26.349721,-0.019739,7.647722,0.011018,0.916404,0.993796,10,0.719583306,green,gene13573,thyroid receptor-interacting protein 11-like isoform X1
766,gene13575,0.191426,0.143922,3.490259,50.213654,-0.181863,5.277414,0.340353,0.559625,0.974759,8,0.373865658,red,gene13575,protein pellino-like
767,gene13576,0.347595,0.242714,1.716303,43.681697,-0.198599,5.181151,0.128278,0.720224,0.98622,7,0.653254046,turquoise,gene13576,rho-associated protein kinase 1-like isoform X1
768,gene13577,0.909826,0.566481,0.279999,61.351988,0.077023,6.57022,0.087933,0.766821,0.987969,9,0.60494681,blue,gene13577,serine/threonine-protein phosphatase 2A 56 kDa regulatory subunit alpha isoform-like
769,gene13580,0.295289,0.186163,2.559752,41.288354,-0.318113,5.089272,0.617056,0.432143,0.952191,7,0.251786113,brown,gene13580,carboxypeptidase Q-like
770,gene13584,0.532413,0.394793,0.627996,5.798123,0.151569,5.15153,0.154125,0.694624,0.984396,7,0.485172837,brown,gene13584,ribosome biogenesis protein NOP53-like isoform X1
771,gene13585,0.000443,0.000947,2.946758,4.923587,-0.469417,4.619008,1.413603,0.234459,0.916485,6,0.235093198,turquoise,gene13585,disheveled-associated activator of morphogenesis 1-A-like isoform X1
772,gene13586,0.683463,0.478864,-0.176686,6.207791,-0.18265,4.592451,0.247891,0.618564,0.978657,6,0.639075462,blue,gene13586,kinesin-like protein KIF6
773,gene13588,0.165579,0.148894,6.714943,24.530052,-0.104397,8.094227,0.158118,0.690895,0.98412,10,0.459953534,blue,gene13588,selenoprotein N-like isoform X1
774,gene13594,0.480436,0.32243,0.847605,1.588142,0.354721,6.217958,0.992524,0.319126,0.93226,9,0.652778625,turquoise,gene13594,uncharacterized protein LOC111128772
775,gene136,0,0,1.204887,1.032768,0.084166,5.219481,0.05445,0.815493,0.992241,7,0.232478936,red,gene136,"dynein assembly factor 1, axonemal-like isoform X1"
776,gene1360,0,0,4.304775,16.538193,-0.718233,3.462311,1.274849,0.258859,0.924946,3,0.416815991,turquoise,gene1360,estradiol 17-beta-dehydrogenase 11-like
777,gene13601,0.011999,0.017239,-7.806587,24.80293,-0.42071,5.578848,1.167199,0.279978,0.928733,8,0.465723577,yellow,gene13601,papilin-like isoform X1
778,gene13605,3.00E-06,8.00E-06,-3.794687,30.146636,-0.109111,5.165445,0.129382,0.719074,0.98622,7,0.13974919,turquoise,gene13605,"sprouty-related, EVH1 domain-containing protein 2-like isoform X1"
779,gene13607,0.028937,0.040156,0.748543,1.049162,1.066367,4.145801,0.972975,0.323939,0.93226,5,0.315972034,red,gene13607,uncharacterized protein LOC111131601 isoform X1
780,gene13608,0.397612,0.262614,2.426808,18.734924,-0.216326,3.392748,0.117138,0.732159,0.986913,3,0.021161025,brown,gene13608,regulator of microtubule dynamics protein 2-like
781,gene13609,0,0,0.794281,43.167448,0.159928,6.227123,0.31387,0.575315,0.976289,9,0.247456709,turquoise,gene13609,protein yippee-like 5 isoform X1
782,gene13612,0.707573,0.490333,-0.067593,0.962648,-0.839816,4.905474,0.864959,0.352355,0.93226,7,0.852344425,turquoise,gene13612,uncharacterized protein LOC111130381 isoform X1
783,gene13614,0.246755,0.179654,-0.140333,0.350894,-1.217524,5.620349,4.636958,0.03129,0.659026,8,0.324435555,yellow,gene13614,uncharacterize lncRNA
784,gene13616,0.064714,0.084565,4.208835,53.575785,0.239282,7.400403,0.904383,0.341609,0.93226,10,0.664181881,pink,gene13616,tyrosine-protein kinase CSK-like isoform X1
785,gene13617,0.065886,0.085834,-3.777501,27.989642,-0.537975,3.899312,0.386429,0.534183,0.967596,4,0.398280263,turquoise,gene13617,uncharacterized protein LOC111128993
786,gene13619,0.459272,0.372514,-0.079535,0.900499,-0.159858,4.672975,0.038985,0.843478,0.992241,6,0.727828211,turquoise,gene13619,photoreceptor-specific nuclear receptor-like
787,gene13620,0,0,-12.149933,47.272776,0.746129,4.332679,1.188303,0.275672,0.928733,5,0.503127029,turquoise,gene13620,GTP cyclohydrolase 1-like
788,gene13622,0.292108,0.21765,1.923516,31.354676,0.030593,4.471033,0.00506,0.94329,0.995826,6,0.476773645,yellow,gene13622,"28S ribosomal protein S29, mitochondrial-like isoform X1"
789,gene13623,0.149666,0.122496,1.284809,25.926627,-0.096118,7.792099,0.197361,0.656859,0.981306,10,0.690975025,green,gene13623,uncharacterized protein LOC111131498 isoform X1
790,gene13625,0,0,-17.954819,35.257294,0.314912,4.018908,0.533022,0.465339,0.956091,5,0.578849205,green,gene13625,DNA repair protein REV1-like isoform X1
791,gene13630,9.00E-06,2.20E-05,4.364706,12.989483,-1.00983,3.571959,2.451013,0.117449,0.848816,3,0.442156673,red,gene13630,uncharacterized protein LOC111128722 isoform X1
792,gene13634,0.070203,0.071646,0.181606,1.614088,-0.229248,7.939998,0.451276,0.50173,0.961079,10,0.463149485,turquoise,gene13634,uncharacterized protein LOC111130235
793,gene13645,0.540298,0.39212,-0.053666,0.23333,0.392784,5.210557,1.053097,0.304795,0.93226,7,0.556804145,pink,gene13645,cdc42 homolog
794,gene13646,0,0,-1.221896,3.189817,-0.717881,5.448529,2.770302,0.096028,0.825168,8,0.542507545,blue,gene13646,uncharacterized protein CXorf65 homolog
795,gene13647,0.066756,0.058433,-0.623568,19.645634,-0.17861,4.44517,0.176626,0.674289,0.983547,6,0.691562464,turquoise,gene13647,neurexin-1-like isoform X1
796,gene13652,0.037329,0.048153,0.363185,8.154883,0.492482,5.38935,0.618431,0.431631,0.95203,8,0.067564733,blue,gene13652,LOW QUALITY PROTEIN: beta-hexosaminidase subunit beta-like
797,gene13654,0,0,-18.97202,43.164383,-0.381886,5.006523,0.163351,0.68609,0.98412,7,0.11150162,turquoise,gene13654,beta-hexosaminidase subunit beta-like isoform X1
798,gene13657,0.173978,0.154158,1.426173,4.096621,-0.022802,5.589229,0.001383,0.970331,0.998341,8,0.932146375,turquoise,gene13657,solute carrier family 23 member 1-like isoform X1
799,gene13659,0.978398,0.58967,-0.004653,0.867792,0.726129,5.142652,1.105914,0.292972,0.930457,7,0.326237305,blue,gene13659,uncharacterized protein LOC111131157
800,gene1366,0.001107,0.002229,-2.057836,87.370781,-0.029489,3.905017,0.002914,0.956949,0.997184,4,0.329391047,yellow,gene1366,CWF19-like protein 1
801,gene13666,0.176168,0.178643,-0.553536,1.201698,0.03119,4.438418,0.000935,0.975601,0.998341,6,0.894540388,turquoise,gene13666,cytoglobin-2-like
802,gene13670,0.220157,0.179372,-0.149591,1.575663,-0.259205,5.655043,0.175824,0.674987,0.983547,8,-0.016208098,turquoise,gene13670,uncharacterized protein LOC111128608
803,gene13671,0.347078,0.24237,-0.966391,2.304126,-0.213094,6.135269,0.203694,0.651755,0.981108,9,0.276127613,brown,gene13671,uncharacterized protein LOC111130228
804,gene13673,0.0514,0.053753,0.525728,2.721319,-1.11354,4.254097,2.665287,0.102559,0.832617,5,0.694348146,turquoise,gene13673,uncharacterized protein LOC111128763
805,gene13674,0.005363,0.008267,0.676182,47.899081,-0.164348,4.949288,0.226215,0.634344,0.981108,7,0.465239609,brown,gene13674,uncharacterized protein LOC111131638
806,gene13680,0,0,4.112547,2.570136,0.38663,4.801512,0.537004,0.463677,0.956091,7,0.446012746,green,gene13680,uncharacterized protein LOC111131678
807,gene13682,0.461036,0.370154,-0.128671,0.531132,-0.38721,4.001298,0.219806,0.639188,0.981108,5,0.251640891,yellow,gene13682,"probable diaminopimelate decarboxylase, chloroplastic isoform X1"
808,gene13684,0.028886,0.042719,-0.65232,0.590873,-0.029561,3.150377,0.001863,0.965569,0.997988,2,0.245273972,blue,gene13684,uncharacterized protein LOC111130379
809,gene13685,0.322783,0.292417,-0.082231,0.651395,0.302345,3.989572,0.398131,0.528056,0.967269,5,0.380342601,blue,gene13685,hillarin-like
810,gene13687,0.147304,0.136963,-2.385081,38.619167,-0.013425,4.846604,0.000872,0.976443,0.998341,7,0.521859784,blue,gene13687,"28S ribosomal protein S27, mitochondrial-like"
811,gene13689,0.106391,0.110645,-1.451915,42.894655,-0.021259,4.675377,0.003479,0.952963,0.997184,6,0.543739625,red,gene13689,zinc transporter 5-like isoform X1
812,gene13690,0,0,-5.695661,77.267437,-0.472682,3.60036,1.059044,0.303433,0.93226,4,0.24642095,turquoise,gene13690,importin-11-like
813,gene13696,0.814237,0.532609,0.126611,2.561693,0.13314,4.594813,0.077201,0.781127,0.988324,6,0.296046815,yellow,gene13696,sodium/glucose cotransporter 4-like
814,gene13701,0,0,-12.013707,47.031889,-0.015195,7.073439,0.004598,0.945938,0.996308,10,0.272182865,turquoise,gene13701,probable beta-tubulin polyglutamylase isoform X3
815,gene13702,0.238868,0.191031,-0.150877,70.935339,-0.107092,3.788119,0.047515,0.827445,0.992241,4,0.196086072,turquoise,gene13702,snRNA-activating protein complex subunit 3-like
816,gene13704,0,0,15.596343,54.887319,0.025365,5.160028,0.003669,0.951697,0.997184,7,0.520780805,turquoise,gene13704,chromatin assembly factor 1 subunit A-like
817,gene13705,0.951253,0.58035,0.030931,2.313796,-0.123857,7.330021,0.332706,0.56407,0.974871,10,0.620695462,green,gene13705,endophilin-A3-like isoform X1
818,gene13710,0,0,-4.609695,54.72493,0.691135,4.927323,1.003673,0.316423,0.93226,7,0.66153696,turquoise,gene13710,uncharacterized protein LOC111129501 isoform X1
819,gene13713,0.822408,0.535434,0.722552,62.417301,-0.314291,3.767275,0.258653,0.611047,0.978657,4,0.829541345,red,gene13713,E3 ubiquitin-protein ligase synoviolin-like
820,gene13716,0.126429,0.145233,-0.137844,0.282142,-0.787442,4.527006,0.888775,0.345809,0.93226,6,0.612245926,turquoise,gene13716,uncharacterized protein LOC111128928
821,gene13718,5.70E-05,0.000128,4.543059,22.372399,-0.499871,6.314486,3.455432,0.063044,0.771175,9,0.700640964,green,gene13718,uncharacterized protein LOC111130498 isoform X1
822,gene13719,0,0,7.648862,8.142101,-0.425767,4.192271,0.838128,0.359933,0.93233,5,0.771670786,red,gene13719,synaptotagmin-14-like isoform X2
823,gene13720,0.422405,0.286553,1.240473,36.934492,0.232757,5.281903,0.498534,0.480145,0.959052,8,0.473372609,brown,gene13720,nuclear cap-binding protein subunit 1-like
824,gene13722,0.000132,0.000279,-7.826963,67.903858,0.395433,5.633742,1.47602,0.224398,0.911329,8,0.717709793,blue,gene13722,coiled-coil domain-containing protein 171-like isoform X1
825,gene13723,0.91045,0.56666,0.084865,23.699946,-0.510678,4.932417,0.752888,0.385563,0.93925,7,0.38419633,magenta,gene13723,uncharacterized protein LOC111131795
826,gene13725,0.193246,0.201192,-2.255972,88.887982,0.110017,5.54683,0.087608,0.767241,0.987969,8,0.271971987,brown,gene13725,E3 ubiquitin-protein ligase RNF115-like
827,gene13726,0.136752,0.134171,-1.7139,19.179621,-0.573388,4.244377,0.538939,0.462873,0.956091,5,0.435782137,turquoise,gene13726,AP-5 complex subunit beta-1-like
828,gene13729,0.018292,0.022991,-1.276732,4.944814,0.215727,3.955582,0.064023,0.800247,0.990433,4,0.847296231,turquoise,gene13729,organic cation transporter protein-like
829,gene13734,0.194067,0.130629,-0.378795,23.000542,-0.339788,3.542736,0.342328,0.558488,0.974759,3,0.46393093,turquoise,gene13734,uncharacterized protein LOC111128787
830,gene13736,0.588614,0.437347,-1.803866,46.845744,-0.264367,4.908225,0.539079,0.462815,0.956091,7,0.495739226,yellow,gene13736,regulation of nuclear pre-mRNA domain-containing protein 2-like
831,gene13737,2.00E-06,6.00E-06,4.22533,24.903487,0.330183,3.549138,0.301782,0.582767,0.977018,3,0.40936058,black,gene13737,chondroitin sulfate synthase 1-like
832,gene13742,0.204064,0.167969,-2.221398,16.49932,0.028026,7.137368,0.010908,0.91682,0.993796,10,0.768525646,red,gene13742,uncharacterized protein LOC111129131 isoform X1
833,gene13743,0.002042,0.003948,5.067411,40.874201,-0.321424,3.510531,0.447462,0.503543,0.961585,3,0.459876675,yellow,gene13743,uncharacterize lncRNA
834,gene13744,0.166936,0.179789,0.423515,0.407264,-2.486738,4.363574,4.163032,0.041315,0.699822,5,0.604368138,turquoise,gene13744,endoplasmic reticulum membrane-associated RNA degradation protein-like
835,gene13747,0,0,-1.602684,5.031236,0.023753,5.682849,0.00816,0.928022,0.993796,8,0.285478986,turquoise,gene13747,aftiphilin-like isoform X1
836,gene13751,0.369143,0.254884,3.085802,13.565958,-0.336949,5.072863,0.616549,0.432333,0.952191,7,0.625509373,purple,gene13751,uncharacterized protein LOC111128497 isoform X1
837,gene13755,0.000174,0.000378,1.390117,3.581104,-1.625536,4.623815,5.190379,0.022712,0.601835,6,0.530137597,turquoise,gene13755,uncharacterized protein LOC111130742
838,gene13756,0.072155,0.092569,2.477676,61.960809,-0.294493,5.607633,0.882521,0.347512,0.93226,8,-0.100748785,turquoise,gene13756,serum response factor-like
839,gene13757,0.662743,0.470683,0.661782,39.371414,0.135389,5.807456,0.102735,0.748572,0.987969,8,0.844723,turquoise,gene13757,glutaminyl-peptide cyclotransferase-like
840,gene13758,0.374287,0.257826,3.645103,37.072428,0.122539,5.50395,0.20948,0.647175,0.981108,8,0.520029399,green,gene13758,poly(A) polymerase beta-like isoform X1
841,gene13761,0.186913,0.142461,1.73609,82.757736,0.157398,3.615962,0.086771,0.768322,0.987969,4,0.326054926,yellow,gene13761,endoribonuclease Dicer-like
842,gene13762,0,0,20.159559,26.769415,-0.302852,5.066959,0.615181,0.432844,0.952697,7,0.426857356,red,gene13762,serine palmitoyltransferase 2-like
843,gene13763,0.000398,0.000819,-1.447427,23.10267,0.646491,4.846726,0.948561,0.330086,0.93226,7,0.588850702,turquoise,gene13763,serine palmitoyltransferase 2-like
844,gene13764,0.400218,0.278374,-1.302858,51.145731,0.187664,7.204096,0.766149,0.381411,0.939236,10,0.663377284,green,gene13764,reticulon-1-A-like isoform X1
845,gene13765,0.264463,0.220692,-0.143131,0.82833,0.483319,4.118838,0.297852,0.585232,0.977567,5,0.530815726,turquoise,gene13765,L-asparaginase-like
846,gene13767,0.477085,0.322488,2.89245,44.870414,-0.35247,4.232226,0.147726,0.700718,0.985024,5,0.796505603,turquoise,gene13767,L-asparaginase-like isoform X1
847,gene13769,0.266813,0.1777,-1.956472,63.475903,0.623594,5.901227,1.241713,0.265141,0.925081,9,0.919490916,turquoise,gene13769,mitogen-activated protein kinase kinase kinase 10-like
848,gene13770,0.548703,0.418602,1.400861,26.499119,0.116659,4.67802,0.081867,0.774783,0.987969,6,0.726684396,turquoise,gene13770,protein FAM172A-like isoform X1
849,gene13773,0.112069,0.131886,0.764051,1.219882,0.400249,5.33995,0.156387,0.692505,0.984124,8,0.868005689,turquoise,gene13773,neurogenic locus notch homolog protein 2-like
850,gene13774,0.210291,0.185585,-0.190106,0.634715,0.594321,4.911311,0.896654,0.34368,0.93226,7,0.768280713,turquoise,gene13774,endoplasmic reticulum aminopeptidase 1-like isoform X1
851,gene13785,0.162091,0.119574,-0.229787,0.727362,0.715754,4.172104,2.319447,0.127765,0.860254,5,0.013869632,turquoise,gene13785,hemicentin-1-like isoform X1
852,gene13787,0.08967,0.09495,-2.322947,2.353005,-0.118171,4.867051,0.10631,0.744385,0.987969,7,0.521983481,blue,gene13787,advillin-like isoform X1
853,gene13802,0.294443,0.273813,-0.545068,0.208698,-0.309041,3.528092,0.320699,0.571188,0.976289,3,0.163963985,turquoise,gene13802,uncharacterized protein LOC111129474
854,gene13803,0.477703,0.378903,-0.135174,0.699125,0.323449,3.876287,0.152905,0.695774,0.984879,4,0.684401986,red,gene13803,probable G-protein coupled receptor 139 isoform X1
855,gene13806,0,0,15.178636,15.19149,-0.427664,4.04539,0.746499,0.387587,0.940016,5,0.332538991,blue,gene13806,uncharacterized protein LOC111130270
856,gene13809,0.107664,0.097494,-19.411535,39.303487,0.375177,3.464741,0.445693,0.504387,0.962365,3,0.392624104,turquoise,gene13809,AP-4 complex subunit mu-like
857,gene13810,0.060991,0.065632,-0.941543,71.950319,-0.317252,6.52993,1.529086,0.21625,0.90979,9,0.468091804,yellow,gene13810,RAC-alpha serine/threonine-protein kinase-like isoform X2
858,gene13812,0.214621,0.156468,-1.817798,9.985742,0.079433,5.35596,0.048049,0.826494,0.992241,8,0.511863321,turquoise,gene13812,inositol-trisphosphate 3-kinase B-like isoform X1
859,gene13813,0.32952,0.296642,-0.080155,0.350638,0.229448,6.332747,0.399399,0.5274,0.967269,9,0.604841294,turquoise,gene13813,galectin-8-like
860,gene13816,0.216318,0.204947,0.135792,8.853723,0.763865,4.774577,1.126367,0.288552,0.92928,6,0.396893171,turquoise,gene13816,uncharacterized protein LOC111128968
861,gene13823,0.662483,0.460734,-0.574309,4.567925,0.337225,4.476526,0.472464,0.491856,0.959914,6,0.366093724,blue,gene13823,leucine-rich repeat-containing protein 74B-like
862,gene13831,0.450918,0.322125,0.229397,1.456238,-0.142351,7.08805,0.104649,0.74632,0.987969,10,0.348715101,black,gene13831,dual oxidase 2-like isoform X1
863,gene13837,0,0,-0.628608,2.086873,0.569021,4.351713,0.54356,0.460961,0.956091,5,0.099921177,turquoise,gene13837,protein toll-like
864,gene13841,0.023326,0.032311,-5.549815,5.928809,-0.002289,5.277485,3.30E-05,0.995409,0.999244,8,0.489130373,pink,gene13841,sphingosine-1-phosphate phosphatase 2-like
865,gene13843,6.00E-06,1.50E-05,-11.669599,53.386518,0.019624,6.623609,0.003906,0.950166,0.997184,9,0.399369581,red,gene13843,T-complex protein 1 subunit delta-like
866,gene13848,0.009145,0.013363,-4.775068,26.214965,0.601002,7.709066,1.44919,0.228658,0.915304,10,0.293327206,turquoise,gene13848,sacsin-like
867,gene13853,0.064176,0.075325,0.225723,2.518884,-0.982884,6.654285,2.894874,0.088862,0.818307,9,0.242522093,brown,gene13853,ribonuclease Oy-like
868,gene13861,0.894195,0.561023,-0.013366,0.420383,-0.579244,3.481888,1.365317,0.242618,0.920187,3,0.724320909,purple,gene13861,leucine-rich repeat-containing protein 9-like isoform X1
869,gene13876,0.45393,0.282875,-2.979896,44.29749,-0.499373,9.979511,2.53166,0.111583,0.840276,10,0.7356593,magenta,gene13876,60S ribosomal protein L4-like
870,gene13878,0.177708,0.142116,-0.054293,0.468711,-0.410187,4.800584,0.900466,0.342657,0.93226,7,0.550953796,red,gene13878,vascular endothelial growth factor receptor 1-like isoform X1
871,gene13879,0.0078,0.01345,2.275213,61.963931,0.229313,3.401697,0.173538,0.676986,0.983547,3,0.112835262,turquoise,gene13879,protein prenyltransferase alpha subunit repeat-containing protein 1-like isoform X1
872,gene13882,0.177179,0.130789,3.037069,14.693166,0.033762,6.610731,0.015469,0.90102,0.993796,9,0.167863442,turquoise,gene13882,cysteine-rich motor neuron 1 protein-like
873,gene13883,0.087543,0.108271,-1.516573,4.305283,-0.920851,4.405363,1.327445,0.24926,0.921675,6,0.704232482,turquoise,gene13883,mitochondrial genome maintenance exonuclease 1-like
874,gene13886,0,0,-7.273853,71.433773,-0.383141,3.5053,0.334011,0.563307,0.974781,3,0.444654998,blue,gene13886,sugar transporter SWEET1-like
875,gene13888,0,0,23.731045,41.703151,-0.323543,5.58774,1.108014,0.292514,0.930457,8,0.554578996,green,gene13888,SURP and G-patch domain-containing protein 1-like isoform X1
876,gene13893,1.20E-05,3.10E-05,-5.937083,30.201047,0.004244,5.429473,0.00012,0.991269,0.999244,8,0.408410074,brown,gene13893,protein PRRC1-A-like
877,gene139,0.037806,0.048891,-0.454712,9.731328,0.139848,7.24274,0.369123,0.543483,0.969301,10,0.153553832,turquoise,gene139,LOW QUALITY PROTEIN: uncharacterized protein LOC111129446
878,gene13902,0.032824,0.042783,3.584208,18.341676,-0.373591,4.229276,0.092236,0.761354,0.987969,5,0.89415114,turquoise,gene13902,thyrostimulin beta-5 subunit-like
879,gene13905,0.017344,0.02103,1.802097,40.515895,0.447343,5.878216,1.94239,0.163409,0.885762,9,0.712924945,pink,gene13905,EH domain-binding protein 1-like isoform X1
880,gene13907,0.448436,0.366332,-1.429012,78.22455,-0.560823,5.191363,3.901739,0.048236,0.728303,7,0.381993907,turquoise,gene13907,uncharacterized protein LOC111130331
881,gene13908,0.070881,0.060574,2.572958,20.650234,0.001272,7.413408,4.30E-05,0.994786,0.999244,10,0.639870283,turquoise,gene13908,serine/threonine-protein phosphatase 4 regulatory subunit 4-like isoform X1
882,gene13923,0.000123,0.000273,-13.013712,70.015758,0.391667,4.562382,1.293917,0.255327,0.921701,6,0.485907196,pink,gene13923,proteasome activator complex subunit 4B-like
883,gene13930,0.829795,0.537884,0.205384,35.500382,-1.157605,4.303826,1.723073,0.189298,0.898032,5,0.58412114,turquoise,gene13930,kinetochore-associated protein 1-like
884,gene13931,0.824429,0.536244,0.021812,0.45775,-1.619422,3.7719,3.084091,0.079061,0.799972,4,0.591684724,turquoise,gene13931,uncharacterized protein LOC111130113 isoform X1
885,gene13933,0,0,-7.396155,50.837641,0.301074,5.410713,1.060165,0.303177,0.93226,8,0.369603997,green,gene13933,E3 ubiquitin-protein ligase arih1-like
886,gene13934,0.273426,0.18146,-3.644623,37.97672,0.049537,4.745108,0.016498,0.897797,0.993796,6,0.074604138,turquoise,gene13934,"1-phosphatidylinositol 4,5-bisphosphate phosphodiesterase beta-4-like isoform X1"
887,gene13935,0.207065,0.212149,0.526502,5.358046,0.297206,4.212671,0.488299,0.484687,0.959157,5,0.451885515,red,gene13935,uncharacterized protein LOC111128350 isoform X1
888,gene13937,0.221272,0.222909,0.614848,38.094388,0.10372,3.707628,0.033343,0.855112,0.993016,4,0.469046341,red,gene13937,DNA polymerase alpha subunit B-like
889,gene13949,0.181353,0.142736,1.086441,7.114703,-0.376286,7.100838,1.826917,0.176492,0.892094,10,0.570717576,red,gene13949,homeobox protein Meis1-like
890,gene13950,0.002568,0.004615,1.282297,74.845998,-0.191393,3.756936,0.090823,0.763133,0.987969,4,0.453180573,turquoise,gene13950,eIF-2-alpha kinase GCN2-like
891,gene13951,0.095394,0.099628,-2.057918,1.135904,-0.030183,4.508698,0.004077,0.949091,0.997021,6,0.441635651,yellow,gene13951,ectonucleoside triphosphate diphosphohydrolase 1-like isoform X1
892,gene13952,0.519254,0.403677,-0.185236,0.285329,-0.304141,4.857006,0.262228,0.608594,0.978657,7,0.432787726,blue,gene13952,nucleoside-triphosphatase-like
893,gene13963,0.169045,0.131519,1.335372,42.878461,0.29314,4.945873,0.639883,0.423753,0.950565,7,0.611726769,green,gene13963,ral GTPase-activating protein subunit alpha-1-like isoform X1
894,gene13966,0.469528,0.344255,0.074922,0.511433,1.497322,5.159028,2.380109,0.122889,0.855474,7,0.819934932,turquoise,gene13966,probable G-protein coupled receptor CG31760
895,gene13968,4.40E-05,0.000105,-9.130917,51.81245,-0.028908,5.542423,0.012709,0.910241,0.993796,8,0.539128946,green,gene13968,inositol-tetrakisphosphate 1-kinase-like
896,gene13970,0.108076,0.128168,2.165719,3.401417,0.041421,5.347801,0.013448,0.90768,0.993796,8,0.41994473,yellow,gene13970,LOW QUALITY PROTEIN: uncharacterized protein LOC111129868
897,gene13977,0,0,-11.544365,80.043332,-0.132497,4.550351,0.143385,0.704939,0.985225,6,0.354605937,blue,gene13977,uncharacterized protein LOC111129830
898,gene13982,0.482366,0.384627,-0.489676,1.85488,0.081562,3.531293,0.014835,0.903057,0.993796,3,0.411162648,black,gene13982,uncharacterized protein LOC111130829
899,gene13988,0.102007,0.122371,-1.487769,3.078078,0.352715,4.230303,0.401014,0.526566,0.967269,5,0.394373641,yellow,gene13988,BRISC and BRCA1-A complex member 2-like
900,gene13990,0.782209,0.520028,0.64073,24.331708,0.479504,4.233952,1.00287,0.316617,0.93226,5,0.036310214,turquoise,gene13990,lysocardiolipin acyltransferase 1-like
901,gene13993,0.139465,0.116655,-14.093536,17.442516,-0.5499,5.435799,2.704317,0.100077,0.82814,8,0.438695085,blue,gene13993,TATA-box-binding protein-like
902,gene140,0.899246,0.562739,0.124116,2.068025,-0.359405,3.351323,0.231412,0.630479,0.980774,3,0.189203051,turquoise,gene140,"acyl-CoA synthetase short-chain family member 3, mitochondrial-like isoform X1"
903,gene14003,0,0,24.479927,9.041978,0.351762,6.497063,1.078431,0.299049,0.931462,9,0.765959738,pink,gene14003,glia maturation factor beta-like isoform X1
904,gene14006,0.069632,0.066913,4.793936,30.83868,-0.142491,3.271106,0.076173,0.782552,0.988618,3,0.220325829,turquoise,gene14006,acyl-CoA:lysophosphatidylglycerol acyltransferase 1-like isoform X1
905,gene14010,0.812584,0.531947,0.197654,2.844386,-0.072241,6.277859,0.081684,0.775029,0.987969,9,0.649852808,green,gene14010,dipeptidyl peptidase 3-like isoform X1
906,gene14011,0.193347,0.201266,-0.233878,0.863452,-0.505504,4.478109,0.948878,0.330005,0.93226,6,0.752923977,turquoise,gene14011,potassium channel subfamily K member 13-like
907,gene14018,0.459043,0.372387,-0.137641,4.68745,0.177172,4.354963,0.114039,0.735592,0.986959,5,0.86315089,turquoise,gene14018,uncharacterized protein LOC111131101 isoform X1
908,gene14019,0.465536,0.338694,1.451606,3.274943,0.3641,5.42742,0.758656,0.38375,0.93925,8,0.667628147,turquoise,gene14019,gephyrin-like isoform X2
909,gene14027,0.11698,0.136509,-0.816622,4.223515,-0.127125,4.661646,0.111649,0.738275,0.987393,6,0.210271163,blue,gene14027,nuclear pore complex protein Nup133-like
910,gene14028,0.215416,0.216302,0.226423,0.673776,-0.371084,3.933353,0.159455,0.689659,0.98412,4,0.738699707,turquoise,gene14028,"arginase, hepatic-like"
911,gene14029,8.00E-06,2.10E-05,-4.356811,4.941976,0.14117,7.715671,0.405769,0.524125,0.967156,10,0.714153428,green,gene14029,hypoxia-inducible factor 1-alpha-like isoform X1
912,gene1404,0.957437,0.582583,0.140524,67.511026,0.920487,4.490617,1.908979,0.167077,0.888303,6,0.366415207,red,gene1404,"pyruvate dehydrogenase protein X component, mitochondrial-like"
913,gene14044,0.066155,0.079326,-1.371017,14.696171,-0.081979,6.653018,0.067669,0.794762,0.989848,9,0.461230376,turquoise,gene14044,N-alpha-acetyltransferase 40-like isoform X1
914,gene14046,4.00E-06,1.20E-05,2.490289,46.20326,0.258964,4.966293,0.469813,0.493073,0.960128,7,0.667322377,turquoise,gene14046,mitogen-activated protein kinase-binding protein 1-like isoform X1
915,gene14057,0,0,-1.46181,18.825004,-0.319003,5.392047,0.389,0.532825,0.967596,8,0.645482996,turquoise,gene14057,UTP--glucose-1-phosphate uridylyltransferase-like isoform X1
916,gene14058,0.049309,0.059576,1.976283,52.806034,-0.022898,3.794133,0.002471,0.960355,0.997272,4,0.458204156,green,gene14058,vacuolar protein sorting-associated protein 54-like
917,gene14059,0.293971,0.273508,0.240482,85.578714,-0.021343,5.17435,0.002391,0.960997,0.997272,7,0.244357507,turquoise,gene14059,transcriptional adapter 2-beta-like
918,gene14060,0,0,12.988442,47.289404,0.434729,5.862372,2.576907,0.108433,0.838567,9,0.519257157,green,gene14060,bromodomain adjacent to zinc finger domain protein 1A-like
919,gene14061,0.166608,0.179521,0.926153,1.52246,-0.250704,8.530501,0.857629,0.354403,0.93226,10,0.661119942,blue,gene14061,"malate dehydrogenase, cytoplasmic-like"
920,gene14066,0,0,8.799064,18.937854,-0.525291,3.685995,0.732931,0.391935,0.941104,4,0.347011867,blue,gene14066,cyclin-K-like
921,gene14070,3.00E-06,9.00E-06,2.580001,74.302682,0.788522,4.326948,4.706863,0.030042,0.648676,5,0.482740825,yellow,gene14070,mediator of RNA polymerase II transcription subunit 17-like
922,gene14072,0.001118,0.002181,-3.938279,27.986168,0.238445,4.209978,0.282552,0.595033,0.978657,5,0.442156954,green,gene14072,polypeptide N-acetylgalactosaminyltransferase 2-like isoform X1
923,gene14074,0.169663,0.152067,0.502904,28.647721,0.220009,4.482825,0.294357,0.587442,0.97838,6,0.149914658,red,gene14074,retinol dehydrogenase 12-like
924,gene14076,0.001163,0.002334,5.967112,85.798721,-0.146822,6.682554,0.265009,0.606699,0.978657,9,0.391703159,green,gene14076,uncharacterized protein LOC111130349
925,gene14078,0.023669,0.03396,-0.685393,6.679439,-0.122597,4.26718,0.032503,0.856929,0.993057,5,0.775371835,red,gene14078,delta-like protein 1
926,gene14082,0.303012,0.279484,1.897494,16.779158,0.490984,4.701886,1.304763,0.253345,0.921675,6,0.389375428,green,gene14082,glucosamine 6-phosphate N-acetyltransferase-like
927,gene14083,0,0,-8.972359,9.510544,-1.42786,3.688093,5.309396,0.021211,0.59183,4,0.455385354,brown,gene14083,"complex I intermediate-associated protein 30, mitochondrial-like"
928,gene14088,0,0,6.752406,45.533251,0.751629,4.470565,2.613113,0.105984,0.83528,6,0.616879101,pink,gene14088,mis18-binding protein 1-like
929,gene14090,0,0,-10.749526,26.567059,0.222662,5.775191,0.411836,0.521039,0.965508,8,0.644495625,green,gene14090,E3 ubiquitin-protein ligase HECTD1-like isoform X1
930,gene14091,0.667081,0.470737,-0.078913,1.43811,0.270069,3.445321,0.326672,0.567625,0.975293,3,0.385080633,turquoise,gene14091,ATP-binding cassette sub-family D member 4-like isoform X1
931,gene14096,0.241316,0.237722,-2.330158,46.471372,-0.593419,5.785892,2.520163,0.112399,0.840276,8,0.74447795,turquoise,gene14096,myosin-I heavy chain-like isoform X4
932,gene14100,0,0,11.350997,58.868255,-0.089389,7.221372,0.13416,0.714157,0.98622,10,0.775467053,yellow,gene14100,protein phosphatase 1B-like
933,gene14101,0.033206,0.036064,4.126255,29.281348,-0.813582,4.545357,1.348136,0.245604,0.920884,6,0.537345345,yellow,gene14101,FERM domain-containing protein 8-like
934,gene14106,0,0,-1.79672,89.090811,0.082807,6.103403,0.066724,0.796168,0.990057,9,0.077237466,blue,gene14106,FERM domain-containing protein 8-like
935,gene14107,0.915113,0.568365,0.089131,85.836812,0.094667,4.391488,0.05072,0.821814,0.992241,6,0.120435723,turquoise,gene14107,cap-specific mRNA (nucleoside-2\'-O-)-methyltransferase 1-like
936,gene14112,0.250138,0.243822,-0.46043,0.540377,-1.143052,4.648515,3.576286,0.05861,0.758235,6,0.511845273,yellow,gene14112,aldose 1-epimerase-like
937,gene14116,0.415934,0.347943,0.880523,7.811436,0.424532,6.640743,0.976496,0.323065,0.93226,9,0.597130529,purple,gene14116,protein dispatched homolog 1-like
938,gene14117,0.497044,0.392155,-0.319149,0.964428,0.113172,3.179339,0.041367,0.838832,0.992241,2,0.37209741,red,gene14117,neuronal acetylcholine receptor subunit alpha-9-like isoform X1
939,gene14118,0.995987,0.595188,0.004089,3.418334,-0.503949,6.229218,0.715866,0.397503,0.944113,9,0.160679666,blue,gene14118,neuronal acetylcholine receptor subunit alpha-2-like
940,gene14125,0.004941,0.008901,-4.958235,24.730603,-0.263872,4.324404,0.47198,0.492078,0.959914,5,0.272364622,blue,gene14125,integrator complex subunit 3-like
941,gene14126,0,0,-2.770126,80.306759,-0.002518,6.84036,0.000112,0.991537,0.999244,10,0.604545304,green,gene14126,striatin-3-like isoform X1
942,gene14127,0,0,-14.589321,51.036397,-0.632457,4.798201,2.768059,0.096163,0.825168,7,0.14154684,turquoise,gene14127,AP-4 complex subunit sigma-1-like
943,gene14132,0,0,7.475381,34.494557,0.130442,6.94093,0.375087,0.540244,0.968995,10,0.483417187,turquoise,gene14132,band 4.1-like protein 3 isoform X1
944,gene14133,0.542108,0.353508,3.084965,4.152685,-1.110847,4.959042,6.070605,0.013745,0.533818,7,0.692258907,turquoise,gene14133,ARL14 effector protein-like isoform X3
945,gene14139,0.022566,0.034533,-0.844124,3.489011,-0.048088,6.791599,0.030163,0.86212,0.993745,10,0.64913152,yellow,gene14139,SH2 domain-containing adapter protein D-like isoform X1
946,gene14147,0.189737,0.198384,1.888108,36.789295,0.017821,7.37872,0.005341,0.941739,0.995637,10,0.55730772,green,gene14147,uncharacterized protein LOC111129536
947,gene14148,0.009305,0.015761,1.409536,2.363762,-0.655762,6.076917,2.284294,0.13069,0.861968,9,0.465922502,red,gene14148,limbic system-associated membrane protein-like isoform X1
948,gene14152,0,0,-12.460275,35.624871,-0.40581,5.156286,1.399423,0.23682,0.916485,7,0.608565396,blue,gene14152,Bardet-Biedl syndrome 1 protein homolog isoform X1
949,gene14158,0.007583,0.012627,0.03336,26.337741,0.173698,4.428956,0.111203,0.738778,0.987397,6,0.375681578,turquoise,gene14158,serine/threonine-protein kinase ATR-like isoform X1
950,gene14160,0.500404,0.393797,1.425451,28.652149,-0.192667,4.235629,0.157789,0.6912,0.98412,5,0.467513278,yellow,gene14160,protein FAM227B-like isoform X1
951,gene14163,0.00017,0.000371,-17.017357,47.794544,0.292569,6.534115,0.882895,0.34741,0.93226,9,0.619134292,green,gene14163,serine/threonine-protein kinase MRCK alpha-like isoform X1
952,gene14164,0.005518,0.00985,-4.104073,79.800646,-0.026965,7.636849,0.011284,0.915405,0.993796,10,0.180250287,turquoise,gene14164,putative transcription factor p65 homolog
953,gene14165,0.05064,0.062312,1.321335,41.7937,0.135936,5.002855,0.200037,0.654691,0.981187,7,0.353147144,red,gene14165,ral GTPase-activating protein subunit beta-like isoform X1
954,gene14167,0.889163,0.558797,0.083087,6.334684,0.182195,5.516115,0.270573,0.602948,0.978657,8,0.606394654,turquoise,gene14167,pecanex-like protein 1
955,gene14169,0.63775,0.459913,0.945159,74.2067,0.064346,7.981164,0.05861,0.808706,0.991316,10,0.68114581,green,gene14169,ribosome-binding protein 1-like isoform X1
956,gene14172,0.208915,0.213619,1.834983,65.80982,0.046629,6.525204,0.027546,0.868181,0.993796,9,0.064342049,turquoise,gene14172,protein-cysteine N-palmitoyltransferase HHAT-like
957,gene14173,0.070979,0.091289,0.042608,0.365035,0.082776,3.899511,0.021192,0.884258,0.993796,4,0.692506948,turquoise,gene14173,potassium voltage-gated channel subfamily H member 1-like
958,gene14184,0.419613,0.27084,-0.467061,0.836604,0.177738,3.677429,0.108551,0.741799,0.987969,4,0.340846281,red,gene14184,calmodulin-lysine N-methyltransferase-like
959,gene14213,0.090484,0.102646,-0.817718,41.56122,0.052046,6.247265,0.03099,0.860262,0.993458,9,0.43136518,yellow,gene14213,"carnitine O-palmitoyltransferase 1, liver isoform-like"
960,gene14225,0.713287,0.49275,0.658721,22.783446,0.180949,3.30819,0.060021,0.806463,0.991016,3,0.08024943,turquoise,gene14225,"39S ribosomal protein L4, mitochondrial-like"
961,gene14227,0.07387,0.068629,6.646454,27.280768,0.614243,4.467919,1.680574,0.194848,0.89842,6,0.343023597,green,gene14227,TNF receptor-associated factor 3-like isoform X1
962,gene14244,0.089502,0.110138,0.22863,0.452724,-0.484413,3.543308,0.482167,0.487442,0.959339,3,0.159202198,turquoise,gene14244,probable peptidylglycine alpha-hydroxylating monooxygenase 1 isoform X1
963,gene14256,0.067756,0.055263,2.902996,32.313679,0.033387,7.41807,0.012217,0.911988,0.993796,10,0.775817381,purple,gene14256,nesprin-1-like isoform X1
964,gene14258,0.062351,0.082115,-0.974297,0.894093,-0.026333,6.287241,0.004426,0.946957,0.996621,9,0.791189924,turquoise,gene14258,limbic system-associated membrane protein-like isoform X1
965,gene14260,2.00E-06,5.00E-06,-3.771259,80.209518,0.229469,7.596665,0.339258,0.560258,0.974759,10,0.282984212,black,gene14260,elongation factor 1-gamma-like
966,gene14261,0.779257,0.518864,0.197607,1.616396,0.215205,3.429065,0.102266,0.749127,0.987969,3,-0.017397022,turquoise,gene14261,calcineurin subunit B type 1-like
967,gene14263,0.572525,0.429681,0.301728,1.482387,-0.337851,4.711358,0.26684,0.605459,0.978657,6,0.663682644,turquoise,gene14263,RAB6A-GEF complex partner protein 2-like
968,gene14280,0.047608,0.06569,-1.899127,1.731533,0.23,6.397462,0.498526,0.480149,0.959052,9,0.658550976,brown,gene14280,LOW QUALITY PROTEIN: sorting nexin-2-like
969,gene14282,0.110758,0.130672,0.117934,0.429746,-0.67412,4.386955,0.983396,0.321362,0.93226,6,-0.031405125,turquoise,gene14282,uncharacterize lncRNA
970,gene14286,0,0,-6.540885,68.73681,1.164196,3.345306,6.861187,0.008809,0.469584,3,0.220683323,turquoise,gene14286,"ATP-binding cassette sub-family B member 10, mitochondrial-like"
971,gene14287,0.000205,0.000458,0.934128,0.402629,-0.65427,5.006217,1.972066,0.160229,0.884593,7,0.74290322,turquoise,gene14287,uncharacterized protein LOC111127858
972,gene14289,0,0,-13.738494,70.907532,0.052131,7.227834,0.030341,0.861719,0.993745,10,0.637748632,brown,gene14289,uncharacterized protein LOC111130532
973,gene143,0,0,-0.288353,2.95664,-1.239885,5.520495,8.679089,0.003219,0.348171,8,0.682622293,blue,gene143,protein FAM124A-like
974,gene14313,0.230138,0.200493,0.115511,1.929133,-0.144605,4.437072,0.026199,0.871414,0.993796,6,0.799236174,turquoise,gene14313,neuronal acetylcholine receptor subunit alpha-10-like isoform X1
975,gene14315,0.570813,0.429,0.096892,0.417536,-0.454295,3.448446,0.374451,0.540588,0.969191,3,0.598240504,turquoise,gene14315,double-stranded RNA-specific adenosine deaminase-like isoform X1
976,gene14316,0,0,-1.535912,80.739554,-0.297813,4.077603,0.138445,0.709832,0.985648,5,0.470948239,red,gene14316,sulfotransferase 1 family member D1-like
977,gene14317,0.608337,0.44655,-0.099629,0.501604,0.649825,5.377947,0.475614,0.490416,0.959613,8,0.391881438,yellow,gene14317,sulfotransferase family cytosolic 1B member 1-like
978,gene14318,0.04162,0.058647,-0.194153,0.252333,0.110607,4.288112,0.040513,0.84048,0.992241,5,0.364275722,blue,gene14318,sulfotransferase family cytosolic 1B member 1-like
979,gene14321,0.000466,0.000949,2.679489,12.59479,-0.614792,4.668506,0.989141,0.319952,0.93226,6,0.101168234,turquoise,gene14321,poly
980,gene14323,0.255185,0.171221,0.679533,21.228941,-0.050223,4.661436,0.006209,0.937192,0.994931,6,0.84021795,turquoise,gene14323,focadhesin-like
981,gene14325,2.10E-05,5.20E-05,-2.340254,9.800622,-0.144719,6.531642,0.346502,0.5561,0.973992,9,0.386860435,brown,gene14325,coiled-coil domain-containing protein 124-like
982,gene1433,0,0,2.515131,77.071408,0.443958,5.845004,1.922361,0.165597,0.887552,9,0.644355378,turquoise,gene1433,rho GTPase-activating protein 18-like
983,gene14336,0,0,2.581598,82.161837,-0.115773,4.247655,0.059986,0.806518,0.991016,5,0.387371266,blue,gene14336,F-box/WD repeat-containing protein 5-like
984,gene1434,0.040543,0.05322,0.446907,0.553113,0.021192,4.828687,0.001406,0.970091,0.998341,7,0.077905474,turquoise,gene1434,saxiphilin-like
985,gene14341,0,0,-12.964595,42.147607,-0.902878,5.180383,3.324829,0.068241,0.778037,7,0.285442994,blue,gene14341,COP9 signalosome complex subunit 2
986,gene14351,0.452562,0.368807,-0.094155,1.173978,-0.953039,7.726109,2.076579,0.149575,0.876049,10,0.268035653,brown,gene14351,uncharacterized protein LOC111129561
987,gene14359,0.680465,0.478625,0.300063,4.607151,-1.870037,4.315671,2.620385,0.105499,0.83528,5,0.259172282,brown,gene14359,microfibril-associated glycoprotein 4-like
988,gene14367,0.000179,0.000404,4.17141,57.306049,0.449187,3.349811,0.837993,0.359971,0.93233,3,0.246531541,turquoise,gene14367,myosin-10-like isoform X4
989,gene14373,0.187491,0.196515,0.091431,1.012325,-0.022456,4.553249,0.002053,0.963857,0.99798,6,0.53135126,yellow,gene14373,leucine-rich repeat-containing protein 61-like isoform X1
990,gene14384,0,0,10.759158,40.423705,-0.024171,7.129768,0.014326,0.904729,0.993796,10,0.001655435,turquoise,gene14384,synaptosomal-associated protein 25-like isoform X1
991,gene14391,0,0,-0.704781,5.342823,0.00444,7.16483,0.000387,0.984311,0.999054,10,0.635139034,yellow,gene14391,LOW QUALITY PROTEIN: B-cell lymphoma/leukemia 11A-like
992,gene14397,0.411255,0.267727,-1.413378,23.48684,0.016641,6.637938,0.008083,0.928363,0.993796,9,0.70302739,green,gene14397,LOW QUALITY PROTEIN: nuclear export mediator factor NEMF-like
993,gene14401,0.0333,0.043577,0.216131,0.73593,-0.036296,5.50717,0.014193,0.90517,0.993796,8,0.419260676,yellow,gene14401,uncharacterized protein LOC111131533
994,gene14406,0.658926,0.469062,-0.214466,2.075344,0.236979,6.549179,0.272849,0.601427,0.978657,9,0.481199142,yellow,gene14406,cartilage matrix protein-like
995,gene14411,0.351424,0.298159,-0.013182,0.626036,0.751181,3.281011,1.837526,0.175241,0.891743,3,0.375666339,black,gene14411,lachesin-like isoform X1
996,gene14413,0,0,5.487067,53.124036,0.064825,3.553599,0.015994,0.899363,0.993796,3,0.511888388,blue,gene14413,"28S ribosomal protein S17, mitochondrial-like"
997,gene14419,0.70736,0.490265,-0.252872,0.601504,0.187578,6.44546,0.489345,0.48422,0.959087,9,0.416174627,yellow,gene14419,sorting nexin-6-like isoform X1
998,gene14420,0.54574,0.417115,0.663848,5.751865,-0.097487,5.907778,0.099452,0.752488,0.987969,9,0.467968715,red,gene14420,early endosome antigen 1-like isoform X1
999,gene14422,0.50321,0.339041,0.918238,64.155851,-0.24917,6.491328,0.903374,0.341879,0.93226,9,0.443557587,turquoise,gene14422,cytoplasmic dynein 1 heavy chain 1-like isoform X1
1000,gene14427,0.552021,0.420209,0.508527,74.449784,-0.727104,4.217074,1.954721,0.162079,0.885762,5,0.547923273,magenta,gene14427,Cytochrome c oxidase assembly factor 6 homolog
1001,gene1443,0.266307,0.251012,-0.689616,5.404552,0.903616,5.23297,6.946293,0.008399,0.468925,7,0.797378928,pink,gene1443,connector enhancer of kinase suppressor of ras 2-like isoform X2
1002,gene14435,0.163751,0.13036,1.388739,1.157683,-0.354163,5.354029,0.528581,0.467204,0.956091,8,0.462586918,yellow,gene14435,uncharacterized protein LOC111131445
1003,gene1444,0.150547,0.140145,-0.167282,0.479308,-0.208632,4.384018,0.163042,0.686371,0.98412,6,0.245557636,blue,gene1444,insulin-like growth factor-binding protein complex acid labile subunit
1004,gene14440,0.553443,0.420955,0.13493,0.36919,0.319907,5.860988,0.306057,0.58011,0.977018,9,0.261281042,black,gene14440,fibropellin-1-like
1005,gene14441,0.519554,0.403849,-0.10795,0.380023,-0.243252,4.686605,0.120952,0.728004,0.986238,6,0.312450406,black,gene14441,"sushi, von Willebrand factor type A, EGF and pentraxin domain-containing protein 1-like"
1006,gene14443,0.028112,0.041732,-0.051148,0.34808,0.29515,4.2822,0.14168,0.706617,0.985478,5,0.514480516,turquoise,gene14443,uncharacterized protein LOC111130066
1007,gene14445,0.025028,0.034224,-1.441439,42.252314,-0.068708,7.270178,0.070822,0.790144,0.989195,10,0.569046472,turquoise,gene14445,protein numb-like isoform X1
1008,gene14453,0.248059,0.202107,-0.471679,1.946133,-2.302273,5.740442,4.218408,0.039988,0.699822,8,0.28541812,red,gene14453,uncharacterized protein LOC111130340 isoform X1
1009,gene14454,0.303665,0.237936,1.895474,11.675837,0.404708,5.301541,0.533229,0.465252,0.956091,8,0.664215255,turquoise,gene14454,uncharacterized protein LOC111130338 isoform X1
1010,gene14464,0.597747,0.441489,0.610867,31.351208,-0.212539,3.897489,0.122258,0.726599,0.98622,4,0.304590974,yellow,gene14464,bifunctional glutamate/proline--tRNA ligase-like
1011,gene14485,0.071576,0.072684,5.686859,63.598582,-0.765459,3.78894,1.818577,0.177483,0.893207,4,0.046237467,turquoise,gene14485,ras GTPase-activating protein 1-like isoform X1
1012,gene14492,0,0,-9.917569,79.750778,0.057927,5.427111,0.039393,0.842672,0.992241,8,-0.024217108,turquoise,gene14492,FERM domain-containing protein 5-like isoform X1
1013,gene14497,5.00E-06,1.40E-05,2.267148,34.637464,0.072276,4.177794,0.0108,0.91723,0.993796,5,0.180946606,brown,gene14497,myosin-IIIb-like isoform X1
1014,gene14514,0.004528,0.00769,-10.07428,50.579516,-0.377431,4.012369,0.546088,0.459921,0.956091,5,0.10264002,turquoise,gene14514,FERM domain-containing protein 5-like isoform X1
1015,gene14531,0.002543,0.004838,-5.105348,32.511033,-0.022029,3.62034,0.002564,0.959616,0.997272,4,0.305496978,red,gene14531,conserved oligomeric Golgi complex subunit 1-like isoform X1
1016,gene14533,0.104051,0.123579,-1.770763,58.387776,0.279051,3.199806,0.183439,0.668434,0.983547,2,0.135060452,red,gene14533,uncharacterized protein LOC111128173
1017,gene14534,0.025339,0.038175,-4.942569,44.241121,-0.599693,3.701521,1.388776,0.238612,0.916485,4,0.159553399,turquoise,gene14534,lamin Dm0-like
1018,gene14541,0.532742,0.410618,-0.616095,67.58313,0.135151,3.987034,0.071088,0.789759,0.989195,5,0.177254851,turquoise,gene14541,bifunctional glutamate/proline--tRNA ligase-like
1019,gene1455,0.026907,0.040209,0.535579,86.123913,0.181031,6.075961,0.276035,0.599312,0.978657,9,0.435183679,green,gene1455,leucine-rich repeat and IQ domain-containing protein 1-like isoform X1
1020,gene14551,0.364,0.272164,-10.253072,40.070547,-1.089175,5.131414,3.465306,0.062669,0.771175,7,0.683221664,turquoise,gene14551,uncharacterized protein LOC111131488 isoform X1
1021,gene14556,0.227449,0.16258,-1.959219,16.104085,0.16241,4.006195,0.10776,0.742709,0.987969,5,0.547421131,green,gene14556,ribonuclease Oy-like
1022,gene14558,0,0,17.244431,25.796917,0.502534,4.627495,1.287538,0.256502,0.922957,6,0.649158323,blue,gene14558,cytoplasmic dynein 2 light intermediate chain 1-like
1023,gene1456,0.211445,0.152874,0.713249,2.167834,0.716601,5.154016,1.104436,0.293295,0.930465,7,0.172644994,turquoise,gene1456,uncharacterized protein LOC111130352
1024,gene14562,0.044457,0.053268,-2.486172,18.820225,-0.188168,5.443896,0.266443,0.605728,0.978657,8,0.120064204,turquoise,gene14562,LOW QUALITY PROTEIN: kinesin-like protein KIF26B
1025,gene1457,0.010138,0.015749,4.335677,15.169136,-0.589824,4.046393,0.356286,0.550576,0.970998,5,0.799732001,turquoise,gene1457,Uncharacterized PPE family protein PPE24
1026,gene14575,0,1.00E-06,4.663048,13.405719,-0.25287,4.739196,0.120381,0.728621,0.98644,6,0.705635883,turquoise,gene14575,LOW QUALITY PROTEIN: NACHT and WD repeat domain-containing protein 2-like
1027,gene14576,0.124044,0.142933,0.454124,28.545438,-0.444199,5.462015,0.848742,0.356908,0.93226,8,0.420782698,turquoise,gene14576,LOW QUALITY PROTEIN: hillarin-like
1028,gene14577,2.30E-05,5.70E-05,-0.157769,0.360545,-0.669844,3.574316,1.908053,0.16718,0.888303,3,-0.007375785,turquoise,gene14577,neuroglobin-like
1029,gene14578,0.402305,0.318266,-0.036376,0.986915,0.201939,4.650493,0.189663,0.663197,0.982916,6,0.085536408,turquoise,gene14578,uncharacterized protein LOC111131519
1030,gene14584,0.074736,0.0761,-0.745068,20.295043,-0.298871,4.972909,0.519735,0.470955,0.956091,7,0.477365201,green,gene14584,MAP3K12-binding inhibitory protein 1-like isoform X4
1031,gene14595,0.179702,0.156349,-0.349969,27.0373,-0.512911,5.65454,1.497073,0.221122,0.911329,8,0.737305035,purple,gene14595,magnesium/proton exchanger 2-like isoform X6
1032,gene14599,0.331495,0.280429,-0.053554,1.021262,-0.352807,6.294567,1.130843,0.287596,0.928733,9,0.117198195,red,gene14599,LOW QUALITY PROTEIN: neuroendocrine convertase 2-like
1033,gene14601,0.085937,0.106685,-0.842649,2.062691,0.711893,8.594742,1.642919,0.199925,0.902231,10,0.959494793,black,gene14601,LOW QUALITY PROTEIN: GON-4-like protein
1034,gene14607,0.287266,0.26906,0.762238,6.320257,-0.256875,4.631259,0.456388,0.499317,0.960259,6,0.301567491,brown,gene14607,"LOW QUALITY PROTEIN: uncharacterized protein LOC111129592, partial"
1035,gene14608,0.727796,0.498179,0.215718,3.23927,-0.47715,5.497966,0.75076,0.386236,0.939715,8,0.471529288,turquoise,gene14608,NFX1-type zinc finger-containing protein 1-like
1036,gene14612,0.054182,0.054874,-2.353355,61.938743,-0.09783,3.661986,0.025951,0.87202,0.993796,4,0.214986535,turquoise,gene14612,LOW QUALITY PROTEIN: deleted in malignant brain tumors 1 protein-like
1037,gene1463,0,0,5.146364,14.815194,-0.222178,8.384409,1.113617,0.291297,0.930457,10,0.611718788,green,gene1463,nuclear factor erythroid 2-related factor 2-like isoform X1
1038,gene14633,0.003716,0.00655,-7.396168,64.194066,-0.517065,4.686678,1.128943,0.288001,0.928733,6,0.151933521,turquoise,gene14633,double zinc ribbon and ankyrin repeat-containing protein 1-like
1039,gene14638,0.004924,0.008874,-4.629574,81.556673,-0.598526,4.694502,1.164045,0.280628,0.928733,6,0.286837433,black,gene14638,dynein regulatory complex subunit 7-like isoform X1
1040,gene1465,0.002184,0.004201,-1.529083,75.467721,0.657124,5.120429,1.796073,0.180188,0.893782,7,0.548334569,green,gene1465,protein argonaute-2-like isoform X1
1041,gene14650,0.226944,0.159628,1.409147,21.89949,0.991361,3.578338,1.966315,0.16084,0.884593,3,0.34986745,turquoise,gene14650,phosphatidylinositol 3-kinase catalytic subunit type 3-like
1042,gene14652,0.067297,0.069329,-6.457001,28.571915,-0.525138,3.670697,0.746978,0.387435,0.940016,4,0.355540268,blue,gene14652,tubulin-folding cofactor B-like isoform X1
1043,gene1466,0.415547,0.347733,-0.504069,1.658672,0.479738,3.594504,0.741704,0.389115,0.940408,4,0.680617518,turquoise,gene1466,zinc finger and BTB domain-containing protein 17-like
1044,gene14660,0.715924,0.493794,0.495377,10.157942,-0.680057,3.182565,1.344481,0.246245,0.92132,2,0.459039029,blue,gene14660,uncharacterized protein LOC111129451
1045,gene14662,0.768922,0.506994,-0.061401,2.819683,0.289018,6.361923,0.397833,0.528211,0.967269,9,0.774024003,turquoise,gene14662,protein trachealess-like isoform X1
1046,gene14678,0.000222,0.000494,9.69795,32.613753,0.390099,4.967326,0.497485,0.480607,0.959052,7,0.310220532,turquoise,gene14678,"dynein intermediate chain 2, ciliary-like isoform X1"
1047,gene14679,0.093279,0.11389,-1.356027,53.236778,0.091659,6.195049,0.064765,0.799117,0.990383,9,0.490040231,brown,gene14679,NADH dehydrogenase
1048,gene14684,0.260584,0.250918,0.179999,0.664639,-0.133551,3.102754,0.039152,0.843148,0.992241,2,0.134485093,turquoise,gene14684,membrane progestin receptor beta-like isoform X1
1049,gene14699,0,0,-19.149909,51.93979,-1.060882,3.653913,2.35479,0.124899,0.856387,4,0.072309199,turquoise,gene14699,tubulin-folding cofactor B-like
1050,gene14700,0,0,3.238857,80.548406,-0.974471,3.587933,1.64865,0.199143,0.901571,4,0.601884699,turquoise,gene14700,baculoviral IAP repeat-containing protein 6-like isoform X1
1051,gene14708,0.12832,0.14684,-1.123364,3.421572,-0.112489,4.729267,0.013965,0.90593,0.993796,6,0.907721691,turquoise,gene14708,protein trachealess-like isoform X1
1052,gene14711,3.30E-05,7.70E-05,-0.655977,51.30772,0.041763,3.262972,0.004831,0.944588,0.995857,3,0.006777974,turquoise,gene14711,G patch domain-containing protein 2-like
1053,gene14727,0.004473,0.008128,-0.26947,0.276131,0.778634,3.676868,2.779189,0.095496,0.825168,4,0.497721755,yellow,gene14727,LOW QUALITY PROTEIN: orexin receptor type 2-like
1054,gene14737,0.193917,0.201704,-1.239386,2.011889,-0.361103,4.344059,0.640248,0.423621,0.950565,5,0.202700068,turquoise,gene14737,LOW QUALITY PROTEIN: protein misato homolog 1-like
1055,gene14739,3.00E-06,8.00E-06,8.019011,74.554902,0.043125,7.97862,0.009703,0.921533,0.993796,10,0.720545284,greenyellow,gene14739,tubulin-specific chaperone A-like
1056,gene14740,0.013512,0.021958,4.540316,72.226515,-0.109244,3.870305,0.040378,0.840742,0.992241,4,0.534070041,yellow,gene14740,5-formyltetrahydrofolate cyclo-ligase-like
1057,gene14746,0.059257,0.060147,1.916434,10.632462,0.264513,5.865393,0.266669,0.605575,0.978657,9,0.240399636,turquoise,gene14746,dimethylaniline monooxygenase
1058,gene14751,0.098584,0.110325,0.740367,7.337295,0.373573,5.3047,0.118551,0.730611,0.986801,8,0.337342729,green,gene14751,uncharacterize lncRNA
1059,gene14768,0.18535,0.140771,1.231417,17.141087,0.628794,9.926002,1.050302,0.305438,0.93226,10,0.635406828,black,gene14768,LOW QUALITY PROTEIN: McKusick-Kaufman/Bardet-Biedl syndromes putative chaperonin-like
1060,gene14771,0,0,16.443965,44.767579,0.229036,7.154488,0.90405,0.341698,0.93226,10,0.581888104,green,gene14771,LOW QUALITY PROTEIN: tankyrase-like protein
1061,gene14774,0.14659,0.113572,5.616091,6.080683,0.284953,6.129281,0.414865,0.51951,0.965262,9,0.875574651,turquoise,gene14774,LOW QUALITY PROTEIN: estrogen receptor beta-like
1062,gene14778,0.027843,0.034776,5.189753,5.623287,-0.74875,4.972419,1.269462,0.259868,0.925081,7,0.594297272,turquoise,gene14778,small conductance calcium-activated potassium channel protein 2-like isoform X1
1063,gene14781,0.257713,0.1942,1.526416,23.99871,-0.047406,6.09487,0.01873,0.891143,0.993796,9,0.454024025,turquoise,gene14781,protein unc-13 homolog A-like isoform X1
1064,gene14782,0.196744,0.204035,0.759943,70.62415,0.157335,4.912922,0.208323,0.648085,0.981108,7,0.359762029,blue,gene14782,coiled-coil domain-containing protein 112-like
1065,gene14786,0.00115,0.002311,-1.988691,2.085562,-0.172557,5.260444,0.135186,0.713115,0.98622,8,0.612933131,turquoise,gene14786,probable ATP-dependent RNA helicase DHX34
1066,gene14789,0.350333,0.309655,-0.800633,53.522692,-0.813653,6.442466,5.463092,0.019422,0.572692,9,0.490392982,brown,gene14789,DNA polymerase epsilon subunit 2-like
1067,gene14799,0,0,-19.839167,57.547947,-0.108909,4.886303,0.030886,0.860496,0.993656,7,-0.124904857,turquoise,gene14799,acid phosphatase type 7-like
1068,gene14802,0.049191,0.065379,-2.575536,12.011768,-0.363039,3.78295,0.450797,0.501957,0.961092,4,0.28199889,turquoise,gene14802,vesicular glutamate transporter 3-like
1069,gene14808,0,0,46.831855,42.39102,0.336199,3.876226,0.324577,0.56887,0.975293,4,0.530642628,turquoise,gene14808,uncharacterized protein LOC111129604
1070,gene14818,0.329182,0.234428,-6.628145,14.987322,-0.33886,4.266801,0.478195,0.489241,0.959339,5,0.266102993,brown,gene14818,protein SREK1IP1-like
1071,gene14829,0.00279,0.005268,2.760505,8.415313,0.382318,3.694033,0.210662,0.646249,0.981108,4,0.264222813,black,gene14829,acid phosphatase type 7-like
1072,gene14831,0.673564,0.458892,-0.057536,4.837873,-0.426558,5.13433,0.515645,0.472705,0.956805,7,0.777758147,turquoise,gene14831,macrophage mannose receptor 1-like isoform X1
1073,gene14832,1.00E-06,3.00E-06,-0.668964,5.985954,-0.008524,4.145079,0.000256,0.987231,0.999244,5,0.288532031,black,gene14832,uncharacterized protein LOC111129607
1074,gene14866,0.351766,0.260902,-1.452515,29.594147,0.405802,7.19434,1.255735,0.26246,0.925081,10,0.627482157,turquoise,gene14866,ryanodine receptor-like
1075,gene14886,1.20E-05,3.00E-05,3.143827,7.605417,0.164681,3.994633,0.043259,0.835238,0.992241,5,0.04058852,turquoise,gene14886,UPF0696 protein C11orf68 homolog isoform X1
1076,gene14889,0,0,-9.272561,79.581954,-0.559147,7.142917,1.252388,0.263097,0.925081,10,0.081553923,turquoise,gene14889,protein disulfide-isomerase A3-like
1077,gene14899,0,0,-24.278194,44.631511,0.54775,3.186126,1.145907,0.284408,0.928733,2,0.01258283,turquoise,gene14899,"frataxin, mitochondrial-like"
1078,gene14902,7.10E-05,0.000163,-5.871376,60.871471,-0.040153,5.07925,0.016373,0.898182,0.993796,7,0.402383055,green,gene14902,LOW QUALITY PROTEIN: E3 SUMO-protein ligase PIAS2-like
1079,gene14903,0.759496,0.511266,-0.566019,4.692746,-0.072795,7.277849,0.075974,0.782829,0.988652,10,0.591236058,brown,gene14903,uncharacterized protein LOC111129296
1080,gene14909,0.011505,0.017554,12.427365,41.76817,0.052072,7.002716,0.038449,0.844544,0.992241,10,0.335263048,black,gene14909,LOW QUALITY PROTEIN: echinoderm microtubule-associated protein-like 2
1081,gene14910,0.027457,0.040892,4.289604,12.535198,-0.008836,6.035779,0.000478,0.982551,0.998759,9,0.734593921,turquoise,gene14910,"LOW QUALITY PROTEIN: dynein heavy chain 6, axonemal-like"
1082,gene14911,0.45776,0.340448,0.615901,2.669131,0.120467,6.074261,0.124576,0.724123,0.98622,9,0.361400611,blue,gene14911,LOW QUALITY PROTEIN: uncharacterized protein LOC111129190
1083,gene14912,0,0,1.668692,1.949556,-0.413645,9.104379,1.297863,0.254604,0.921701,10,0.401750512,magenta,gene14912,LOW QUALITY PROTEIN: histone H1-delta-like
1084,gene14920,0.685535,0.480939,0.014718,0.407275,0.942545,5.989948,3.226231,0.072467,0.786408,9,0.883888841,black,gene14920,LOW QUALITY PROTEIN: microphthalmia-associated transcription factor-like
1085,gene14922,0.335534,0.249168,-1.026113,2.695925,-0.370456,6.617415,0.66243,0.415703,0.948136,9,0.542595881,yellow,gene14922,stAR-related lipid transfer protein 5-like isoform X1
1086,gene14925,0.678592,0.477002,-0.1551,4.513471,0.25462,3.728502,0.156096,0.692776,0.984124,4,0.349614541,green,gene14925,lysine-specific demethylase 8-like
1087,gene14928,0.797259,0.526007,-0.060987,1.357436,-0.12915,3.900953,0.046164,0.829878,0.992241,4,0.131538922,turquoise,gene14928,uncharacterized protein LOC111131516
1088,gene1494,0,0,2.238169,94.535453,0.572834,3.949684,0.881333,0.347837,0.93226,4,0.375791865,green,gene1494,speckle targeted PIP5K1A-regulated poly(A) polymerase-like
1089,gene14945,0.00377,0.006525,5.551843,2.033978,-0.257866,5.368534,0.430147,0.511917,0.964299,8,0.462356794,red,gene14945,nesprin-1-like
1090,gene14946,0.515416,0.381578,-1.907243,34.953188,-0.314722,6.76465,0.932662,0.334172,0.93226,10,0.619581177,turquoise,gene14946,nesprin-1-like isoform X1
1091,gene14966,6.00E-06,1.60E-05,-4.37983,8.416504,-0.898939,4.762874,1.588592,0.207527,0.90532,6,0.490846588,grey,gene14966,peptidyl-prolyl cis-trans isomerase B-like
1092,gene1497,0,0,-19.169641,41.983682,-0.182165,5.109961,0.102782,0.748516,0.987969,7,0.853385772,turquoise,gene1497,oxidation resistance protein 1-like isoform X1
1093,gene14974,0.00019,0.00041,8.383703,29.15329,-0.127284,3.45538,0.051605,0.820294,0.992241,3,0.329045416,turquoise,gene14974,ubiquitin carboxyl-terminal hydrolase 3-like
1094,gene14975,0,0,10.244768,62.18023,-0.540534,9.893061,0.853047,0.355692,0.93226,10,0.134787354,red,gene14975,ubiquitin-60S ribosomal protein L40-like isoform X1
1095,gene14976,0.182349,0.153152,-2.29864,32.082958,-0.503068,4.857715,1.435409,0.230884,0.916332,7,0.493792268,turquoise,gene14976,TNF receptor-associated factor 3-like isoform X1
1096,gene14981,0,0,-15.683963,73.280877,0.332236,4.710739,0.602614,0.437582,0.953855,6,0.389033537,brown,gene14981,uncharacterize lncRNA
1097,gene14989,0.06361,0.083393,-2.196958,5.319079,0.444523,3.843669,0.675531,0.41113,0.946349,4,0.349245701,blue,gene14989,uncharacterized protein LOC111128197
1098,gene14991,0,0,-9.098919,57.68344,-0.12408,5.491006,0.093965,0.759195,0.987969,8,0.460772976,brown,gene14991,splicing factor 3B subunit 2-like
1099,gene14996,0,0,15.831289,16.829899,0.047451,4.67616,0.00866,0.925856,0.993796,6,0.42920141,blue,gene14996,uncharacterized protein LOC111129620
1100,gene15000,0,0,-13.924774,76.396662,-1.174619,3.885192,5.726873,0.016707,0.543871,4,0.571312307,blue,gene15000,serum response factor-binding protein 1-like
1101,gene15013,0.0119,0.017123,-5.986925,15.324399,0.16071,4.426894,0.07332,0.786562,0.988825,6,0.682323132,turquoise,gene15013,protein jagged-1b-like
1102,gene15026,0.023368,0.035591,-0.272944,0.361674,-0.708111,3.875361,1.091908,0.296049,0.931462,4,0.292441807,turquoise,gene15026,apolipophorins-like
1103,gene15030,0,0,-6.671054,27.487305,-0.250946,4.621041,0.363828,0.546388,0.969301,6,0.53401408,red,gene15030,LOW QUALITY PROTEIN: symplekin-like
1104,gene15032,0.222945,0.189946,-0.874043,5.054685,-1.121177,7.129253,5.06006,0.024483,0.611699,10,0.251375399,turquoise,gene15032,LOW QUALITY PROTEIN: uncharacterized protein LOC111129625
1105,gene15033,0.000553,0.001164,-5.753607,30.847836,-0.097475,4.627533,0.061456,0.804209,0.991016,6,0.51511255,yellow,gene15033,LOW QUALITY PROTEIN: protein FAM50A-like
1106,gene15035,0.097889,0.118438,2.187812,13.173707,0.240032,3.3933,0.246349,0.619658,0.978944,3,0.123776863,blue,gene15035,LOW QUALITY PROTEIN: mitochondrial import inner membrane translocase subunit TIM50-like
1107,gene15038,0.989084,0.592994,-0.029216,20.989916,0.027986,7.24949,0.011911,0.913095,0.993796,10,-0.02646459,turquoise,gene15038,serine/arginine-rich splicing factor 6-like isoform X1
1108,gene1504,0.076684,0.097271,-0.098348,0.298239,0.607914,3.875751,0.496238,0.481158,0.959052,4,0.593226354,turquoise,gene1504,uncharacterized protein LOC111133486
1109,gene15046,0.006318,0.010371,-0.24915,0.324803,-0.402715,5.82242,1.031884,0.309717,0.93226,8,0.788174643,blue,gene15046,protein STPG4-like isoform X1
1110,gene15050,1.00E-06,3.00E-06,5.167522,59.416865,-0.18075,6.458421,0.425328,0.51429,0.964536,9,0.544490145,turquoise,gene15050,girdin-like isoform X1
1111,gene15052,0,0,7.677625,50.582672,0.418905,4.187255,0.424122,0.514887,0.964536,5,0.196201972,black,gene15052,DNA-directed RNA polymerase III subunit RPC6-like
1112,gene15054,0.248199,0.19589,2.410684,7.505916,0.090741,8.392025,0.153632,0.695088,0.984459,10,0.860601134,green,gene15054,AT-rich interactive domain-containing protein 4B-like
1113,gene15056,0,0,21.958601,15.895158,-0.495959,4.10387,1.144516,0.2847,0.928733,5,0.455343579,red,gene15056,ADP-ribosylation factor-like protein 2
1114,gene15060,0.107253,0.127344,-0.773383,5.3747,0.038541,7.748858,0.021094,0.884524,0.993796,10,0.193581275,turquoise,gene15060,XK-related protein 6-like
1115,gene1508,0.007652,0.013218,-0.96114,1.010411,-0.638805,4.553757,1.306428,0.253042,0.921675,6,0.302099642,yellow,gene1508,uncharacterized protein LOC111132009
1116,gene15087,0,0,10.947565,11.832354,-0.083302,7.234074,0.060515,0.805684,0.991016,10,0.567538317,blue,gene15087,calcium/calmodulin-dependent protein kinase type IV-like isoform X1
1117,gene15091,0.634881,0.458839,-0.171551,0.439243,-0.62387,5.256995,1.870326,0.171438,0.890817,8,0.590228775,turquoise,gene15091,Down syndrome cell adhesion molecule-like
1118,gene15097,0.610102,0.411384,-0.134811,4.756846,0.685117,3.334688,1.429402,0.231862,0.916332,3,0.35980463,green,gene15097,TNF receptor-associated factor 3-like
1119,gene151,0,0,13.958173,41.264005,-0.703703,6.780502,3.582404,0.058395,0.757556,10,0.600675304,magenta,gene151,serine/arginine-rich splicing factor 7-like isoform X1
1120,gene15101,0,0,8.503664,41.688149,0.695445,6.37951,4.817185,0.028177,0.640836,9,0.542994352,turquoise,gene15101,unconventional myosin-Ie-like isoform X1
1121,gene15111,0.548559,0.392176,1.031361,23.732044,-0.188632,5.82902,0.399246,0.527479,0.967269,9,0.279121194,red,gene15111,tyrosine-protein phosphatase non-receptor type 9-like isoform X1
1122,gene15117,1.40E-05,3.60E-05,0.34102,2.233361,-0.200391,4.011241,0.052066,0.819506,0.992241,5,0.5441718,greenyellow,gene15117,uncharacterized protein LOC111129254
1123,gene15119,0.737886,0.502341,0.379498,7.74277,-0.013345,4.552946,0.000375,0.984541,0.999054,6,0.66469976,turquoise,gene15119,serine/threonine-protein kinase VRK1-like
1124,gene15121,0.002063,0.003642,4.444069,52.99093,0.359626,4.929372,1.321836,0.250263,0.921675,7,0.224647567,yellow,gene15121,putative ATP-dependent RNA helicase TDRD9
1125,gene15123,0.015267,0.024495,-0.233069,0.619154,-0.306945,4.705314,0.698477,0.403296,0.944652,6,0.25193115,turquoise,gene15123,neuron navigator 3-like isoform X4
1126,gene15126,0.238803,0.207277,-2.082126,19.039487,-0.438004,5.409915,1.090081,0.296453,0.931462,8,0.392182493,turquoise,gene15126,uncharacterized protein LOC111129899 isoform X1
1127,gene15129,0.711562,0.492075,-0.027349,0.389415,-0.17004,6.32408,0.151335,0.697263,0.984987,9,0.53219933,blue,gene15129,phospholipid scramblase 1-like isoform X1
1128,gene15131,0,0,-9.696912,11.107302,-0.257507,5.392192,0.520565,0.470601,0.956091,8,0.614792243,purple,gene15131,centlein-like isoform X1
1129,gene15132,0.039362,0.049696,-9.15004,29.28606,-0.620242,4.738812,1.101224,0.293998,0.93117,6,0.749227517,turquoise,gene15132,zinc finger protein basonuclin-1-like isoform X2
1130,gene15148,0.528634,0.408349,-0.284993,1.878843,0.166112,5.462194,0.228249,0.632825,0.980774,8,0.196960679,turquoise,gene15148,uncharacterized protein LOC111129303 isoform X1
1131,gene15153,0.167567,0.150136,-3.190946,34.66787,0.084185,7.837286,0.130569,0.717843,0.98622,10,0.613862455,green,gene15153,retinitis pigmentosa 1-like 1 protein isoform X1
1132,gene15154,0.291957,0.272171,-0.948026,3.129285,-0.092796,3.949498,0.029396,0.863868,0.993796,4,0.58802998,yellow,gene15154,3-oxo-5-alpha-steroid 4-dehydrogenase 1-like
1133,gene15160,0.148452,0.140274,1.356009,27.180804,0.364446,5.790332,0.767399,0.381023,0.939186,8,0.582709432,turquoise,gene15160,uncharacterized protein LOC111130701
1134,gene15161,0,0,-5.337668,69.368721,-0.468615,3.990232,0.989635,0.319832,0.93226,5,0.662487032,turquoise,gene15161,sorting nexin-27-like isoform X1
1135,gene15162,0.132996,0.151093,-1.542286,6.623397,-0.003402,4.35296,5.20E-05,0.994249,0.999244,5,0.463233946,pink,gene15162,neural cell adhesion molecule 2-like
1136,gene15163,0.467654,0.287567,-1.726588,23.983442,0.212008,4.889279,0.182399,0.66932,0.983547,7,0.194741285,blue,gene15163,long-chain-fatty-acid--CoA ligase ACSBG2-like isoform X1
1137,gene15164,0.322618,0.292309,1.599335,7.483998,-0.133508,6.311873,0.258775,0.610963,0.978657,9,0.667125613,green,gene15164,melanoma inhibitory activity protein 2-like isoform X5
1138,gene15165,0.233107,0.231661,1.499414,6.963689,-0.151531,4.841134,0.155372,0.693454,0.984124,7,0.501818112,pink,gene15165,arpin-like
1139,gene15176,0.005339,0.009561,3.641464,59.579023,-0.23405,3.694521,0.137005,0.711277,0.98622,4,0.289299304,blue,gene15176,putative glucose-6-phosphate 1-epimerase isoform X1
1140,gene15178,0.487652,0.38735,0.050392,0.38639,-0.417838,8.11187,0.466889,0.494422,0.960128,10,0.577418021,blue,gene15178,glutaredoxin-1-like
1141,gene15179,0.124336,0.143218,-0.310093,1.494769,-0.072875,3.286837,0.017799,0.893866,0.993796,3,0.223161579,brown,gene15179,uncharacterized protein LOC111128472 isoform X1
1142,gene15181,0.276426,0.210351,-4.496013,21.017769,0.358809,7.626159,1.994245,0.157898,0.883577,10,0.544237665,black,gene15181,LOW QUALITY PROTEIN: ninein-like protein
1143,gene15185,0.144972,0.1196,2.501986,49.91548,-0.060081,5.609083,0.033189,0.855443,0.993016,8,-0.137757051,turquoise,gene15185,uncharacterized protein LOC111131102 isoform X1
1144,gene15186,0.08971,0.097532,0.918239,12.25089,0.499408,4.612483,1.8502,0.17376,0.891743,6,0.630886425,purple,gene15186,LOW QUALITY PROTEIN: kinesin-like protein KIF28P
1145,gene15188,8.00E-06,2.20E-05,9.212584,34.604655,-0.245808,6.373737,0.861828,0.353228,0.93226,9,0.255266461,red,gene15188,LOW QUALITY PROTEIN: pinin-like
1146,gene15193,0,0,1.343339,7.033993,0.6422,3.531645,1.872437,0.171196,0.889863,3,0.539249011,red,gene15193,LOW QUALITY PROTEIN: uncharacterized protein LOC111131085
1147,gene15199,0,0,-0.776571,2.559274,-0.138771,7.867188,0.330589,0.565313,0.974934,10,0.274404754,blue,gene15199,uncharacterized protein LOC111129481 isoform X1
1148,gene15203,0.212621,0.16646,2.002351,13.023953,0.288877,6.237237,0.692076,0.405459,0.945588,9,0.828138976,turquoise,gene15203,zinc finger C2HC domain-containing protein 1C-like
1149,gene15306,0.236914,0.163916,5.053967,39.643276,0.009198,4.687735,8.70E-05,0.992579,0.999244,6,0.668577877,turquoise,gene15306,uncharacterized protein LOC111130858
1150,gene15309,0.31428,0.286737,-0.435958,88.674575,-0.303917,5.952976,0.679685,0.409695,0.945813,9,0.848968106,yellow,gene15309,RNA-binding protein 4.1-like isoform X1
1151,gene15330,0,0,7.284443,70.604526,0.913778,3.413962,3.123784,0.077157,0.792482,3,0.042613958,turquoise,gene15330,uncharacterized protein LOC111130868
1152,gene15336,0.179188,0.157572,0.041111,0.752712,-0.759998,3.606218,1.151448,0.283246,0.928733,4,0.387161341,magenta,gene15336,uncharacterized protein LOC111130054 isoform X1
1153,gene15350,0.000395,0.000798,0.089285,8.877466,0.180839,4.057533,0.098532,0.753599,0.987969,5,0.429888827,black,gene15350,digestive organ expansion factor homolog
1154,gene15352,0.749653,0.507125,-0.417278,66.489499,0.326177,6.974106,0.32733,0.567236,0.975293,10,0.85702978,black,gene15352,serine/threonine-protein phosphatase 4 regulatory subunit 3A-like
1155,gene15354,0.001872,0.003456,-0.809283,9.37141,1.223086,3.688399,4.925512,0.026463,0.62873,4,0.343999356,black,gene15354,IgGFc-binding protein-like isoform X1
1156,gene1537,0.429086,0.274269,10.602188,24.675753,-0.195152,6.522081,0.667371,0.41397,0.946894,9,0.514527911,green,gene1537,uncharacterized protein LOC111128605
1157,gene15379,0.171537,0.152735,2.028579,3.188485,-0.863874,3.601052,3.180591,0.074518,0.787597,4,0.094734123,turquoise,gene15379,uncharacterized protein LOC111130137
1158,gene15380,0.061663,0.073103,2.603316,27.147379,-0.03776,3.461518,0.005326,0.941821,0.995637,3,0.305809946,blue,gene15380,tubulin polyglutamylase TTLL5-like isoform X1
1159,gene15404,0,0,15.515428,12.269559,0.541155,3.375303,0.971594,0.324283,0.93226,3,0.502735455,turquoise,gene15404,centromere protein F-like isoform X1
1160,gene15414,0.27701,0.20545,-1.035115,35.854536,0.643884,3.983613,1.726432,0.188867,0.898032,5,0.417672184,turquoise,gene15414,uncharacterized protein LOC111128648 isoform X1
1161,gene15420,0,0,17.634316,50.565606,-0.240279,4.435732,0.397281,0.528497,0.967269,6,0.598584546,blue,gene15420,BTB/POZ domain-containing protein 19-like
1162,gene15430,0.038399,0.048693,1.121806,7.792693,-0.387862,3.892007,0.486473,0.485505,0.959339,4,0.494611823,turquoise,gene15430,protein grainyhead-like isoform X3
1163,gene15435,0.460996,0.288435,4.059385,16.165545,-0.178556,4.454502,0.099199,0.752793,0.987969,6,0.762156201,turquoise,gene15435,receptor-type tyrosine-protein phosphatase epsilon-like isoform X1
1164,gene15462,5.80E-05,0.000138,-2.055658,13.035841,0.476328,3.783341,0.93812,0.332762,0.93226,4,0.37932765,turquoise,gene15462,protein lingerer-like
1165,gene15463,0.365247,0.250903,-1.671094,20.471481,-0.628756,3.656477,0.744256,0.388301,0.940408,4,0.441301459,magenta,gene15463,6-pyruvoyl tetrahydrobiopterin synthase-like
1166,gene15464,0.590062,0.438017,0.58738,3.269707,0.555356,4.992028,1.166897,0.28004,0.928733,7,0.357739215,turquoise,gene15464,TM2 domain-containing protein 3-like
1167,gene15471,0.283988,0.213859,0.525249,3.160413,0.919101,5.96523,4.18797,0.040712,0.699822,9,0.303975931,black,gene15471,thrombospondin type-1 domain-containing protein 4-like isoform X1
1168,gene15477,0.926406,0.572232,-0.012472,2.62517,0.149188,4.889147,0.052092,0.819462,0.992241,7,0.263021267,turquoise,gene15477,uncharacterized protein LOC111131080
1169,gene15479,0.299801,0.277279,1.270628,6.70693,-0.641761,4.996947,2.354011,0.124961,0.856387,7,0.307172576,blue,gene15479,TALPID3 protein-like isoform X1
1170,gene1549,0.038159,0.042578,-0.099674,42.967075,-0.785211,6.511056,4.369243,0.036593,0.693689,9,0.539721515,turquoise,gene1549,extended synaptotagmin-2-like isoform X1
1171,gene15504,0.048983,0.059255,-12.162888,70.42644,0.124481,3.553644,0.035957,0.849604,0.992847,3,0.471876351,turquoise,gene15504,phospholipid-transporting ATPase ID-like isoform X1
1172,gene15518,0.320626,0.230682,-1.326565,3.47549,-1.024391,3.425931,2.134491,0.144018,0.870219,3,0.441421398,brown,gene15518,protein farnesyltransferase subunit beta-like
1173,gene15523,0.149088,0.165081,2.315689,8.158585,-0.221556,4.445711,0.283585,0.594361,0.978657,6,0.370515672,blue,gene15523,uncharacterized protein LOC111129849 isoform X1
1174,gene15530,0.419599,0.322917,0.017204,2.129681,-1.485521,4.962514,2.13831,0.14366,0.86959,7,0.04133984,turquoise,gene15530,LOW QUALITY PROTEIN: uncharacterized protein LOC111129987
1175,gene15537,0.621885,0.443441,0.038377,4.564088,0.419875,4.582888,1.025756,0.311158,0.93226,6,0.286037271,turquoise,gene15537,uncharacterized protein LOC111129848 isoform X1
1176,gene15559,3.00E-06,9.00E-06,14.469945,21.790651,0.456534,6.252031,2.221761,0.136078,0.863321,9,0.490935492,turquoise,gene15559,phospholipid-transporting ATPase ID-like isoform X1
1177,gene15565,0.266913,0.255405,-0.499498,0.862268,0.066493,6.306096,0.03392,0.853878,0.993016,9,0.280367436,turquoise,gene15565,midasin-like isoform X1
1178,gene15568,0.068382,0.088524,-2.486944,5.129834,-0.611779,4.621529,1.717321,0.190038,0.89842,6,0.194254493,turquoise,gene15568,uncharacterized protein LOC111128871 isoform X1
1179,gene15570,0.869046,0.552599,0.071976,84.342938,0.1131,4.220797,0.039056,0.843337,0.992241,5,0.572215677,yellow,gene15570,B9 domain-containing protein 2-like
1180,gene15584,0.400974,0.271933,-1.644512,11.726996,-0.321452,4.588535,0.601554,0.437986,0.953855,6,0.597952268,turquoise,gene15584,TALPID3 protein-like isoform X1
1181,gene15586,0.000152,0.000332,8.887886,31.321313,0.752171,3.757881,2.66551,0.102545,0.832617,4,0.478679062,green,gene15586,microtubule-associated proteins 1A/1B light chain 3C-like
1182,gene15587,0.036429,0.052258,0.218574,1.083503,0.355617,3.979743,0.155752,0.693098,0.984124,5,0.514376983,red,gene15587,uncharacterized protein LOC111130168
1183,gene15588,0,0,-17.269517,34.05499,0.663557,4.183141,0.949236,0.329914,0.93226,5,0.358397324,black,gene15588,uncharacterized protein LOC111130170
1184,gene15589,0,0,-7.919527,82.775344,-0.331746,5.21874,0.422921,0.515483,0.964625,7,0.325433369,brown,gene15589,26S proteasome non-ATPase regulatory subunit 8-like
1185,gene15592,0.955301,0.58188,-0.01871,0.732441,0.319301,5.441952,0.427797,0.513072,0.964536,8,0.759639912,yellow,gene15592,thrombospondin type-1 domain-containing protein 4-like isoform X1
1186,gene15594,0.421787,0.337275,-0.643864,3.161319,-0.231033,4.442839,0.211659,0.64547,0.981108,6,0.223968287,red,gene15594,hemicentin-1-like
1187,gene15601,0,0,2.495254,12.375887,0.183764,3.795441,0.166912,0.682871,0.98412,4,0.220409271,red,gene15601,ubiquitin-associated protein 2-like isoform X1
1188,gene15605,0.032794,0.047706,2.151424,4.293853,-1.319825,5.19714,1.949422,0.162649,0.885762,7,0.130146971,blue,gene15605,sarcoplasmic reticulum histidine-rich calcium-binding protein-like
1189,gene15607,0.002793,0.005273,-3.773906,9.321328,0.272746,6.149848,0.38709,0.533833,0.967596,9,0.810199036,black,gene15607,uncharacterized protein LOC111129198 isoform X1
1190,gene1561,0.381336,0.28737,0.087301,0.496559,0.077172,6.33577,0.031498,0.859134,0.993244,9,-0.038537062,turquoise,gene1561,MAM and LDL-receptor class A domain-containing protein 1-like
1191,gene15616,0.415959,0.347948,1.540158,42.928461,0.167847,4.542785,0.079545,0.777915,0.988002,6,0.292752867,turquoise,gene15616,5\'-3\' exoribonuclease 2-like isoform X1
1192,gene15620,5.00E-06,1.40E-05,4.021419,67.862135,-0.166158,5.238273,0.219316,0.639562,0.981108,7,0.192498188,turquoise,gene15620,exportin-1-like
1193,gene15624,0.962242,0.584086,0.021934,0.766218,-0.480058,5.613282,1.54972,0.213177,0.908487,8,0.480298859,turquoise,gene15624,LOW QUALITY PROTEIN: uncharacterized protein LOC111131732
1194,gene15627,0.773932,0.516813,0.358035,10.395174,-0.287573,4.64188,0.642306,0.422877,0.950565,6,0.500339059,turquoise,gene15627,LOW QUALITY PROTEIN: nuclear valosin-containing protein-like
1195,gene1563,0.115909,0.135503,0.390643,0.338239,-0.010863,5.164753,0.000269,0.986903,0.999244,7,0.834471407,turquoise,gene1563,uncharacterized protein LOC111129644 isoform X1
1196,gene15634,0.168486,0.181088,-1.510273,4.744174,-0.274993,8.833744,1.07686,0.299401,0.931462,10,0.797506572,purple,gene15634,LOW QUALITY PROTEIN: inversin-B-like
1197,gene15640,0.108109,0.1282,-0.166999,0.866362,0.510477,9.390311,1.196255,0.274071,0.928733,10,0.968457909,black,gene15640,LOW QUALITY PROTEIN: PHD finger protein 10-like
1198,gene15641,0.32346,0.292721,0.17026,0.636865,0.190862,6.185405,0.378357,0.538484,0.96884,9,0.636685542,yellow,gene15641,thyrotroph embryonic factor-like
1199,gene15642,0.070343,0.090615,-2.660136,33.20538,0.129605,6.193201,0.121204,0.727732,0.986238,9,0.603749908,purple,gene15642,LOW QUALITY PROTEIN: MAPK/MAK/MRK overlapping kinase-like
1200,gene15643,0.066926,0.08692,-2.94678,58.188399,-0.37288,6.775217,1.206711,0.271984,0.928587,10,0.560644332,blue,gene15643,LOW QUALITY PROTEIN: ankyrin repeat and EF-hand domain-containing protein 1-like
1201,gene15645,0.724247,0.496978,0.291753,8.142049,-0.121015,4.84145,0.089303,0.765065,0.987969,7,0.609444471,blue,gene15645,LOW QUALITY PROTEIN: serine/threonine-protein phosphatase 2A regulatory subunit B\'\' subunit gamma-like
1202,gene15650,0.87934,0.556218,0.098658,2.722925,-0.419108,4.968781,1.055824,0.30417,0.93226,7,0.232937391,green,gene15650,probable ADP-dependent glucokinase
1203,gene15651,0,0,0.207803,31.469319,-0.325649,5.352535,1.113878,0.291241,0.930457,8,0.309341543,turquoise,gene15651,WD repeat-containing protein 20-like isoform X1
1204,gene15655,0.016839,0.026694,-4.524471,41.121917,-0.466457,4.753087,1.493285,0.221707,0.911329,6,0.565376284,greenyellow,gene15655,ensconsin-like
1205,gene15656,0.141928,0.133413,11.407161,19.042648,-0.079848,5.544748,0.035892,0.849739,0.992857,8,0.276513374,brown,gene15656,kynurenine 3-monooxygenase-like
1206,gene1566,0.154572,0.107134,8.682329,30.06405,0.619459,7.224545,3.04158,0.081157,0.806896,10,0.881274259,turquoise,gene1566,nuclear receptor coactivator 2-like isoform X1
1207,gene15661,0.140474,0.134783,-2.093489,6.723952,0.031097,5.957232,0.005207,0.942475,0.995637,9,0.63010203,black,gene15661,LOW QUALITY PROTEIN: organic cation transporter protein-like
1208,gene15666,0.005607,0.009997,-1.586693,1.308924,0.212426,5.14564,0.175467,0.675298,0.983547,7,0.358917791,green,gene15666,laccase domain-containing protein 1-like isoform X1
1209,gene15667,0,0,-8.089534,75.811658,0.07043,3.195749,0.019357,0.889347,0.993796,2,0.393912631,black,gene15667,LOW QUALITY PROTEIN: mucosa-associated lymphoid tissue lymphoma translocation protein 1-like
1210,gene15675,0.300449,0.227548,-0.279094,0.343881,0.625259,4.850624,0.772576,0.379421,0.939089,7,0.137322833,turquoise,gene15675,LOW QUALITY PROTEIN: L-ascorbate oxidase-like
1211,gene15676,0.546565,0.417505,0.724896,7.755727,0.145441,9.117339,0.27478,0.600143,0.978657,10,0.733781682,pink,gene15676,LOW QUALITY PROTEIN: enolase-phosphatase E1-like
1212,gene15679,0.453912,0.323175,0.728775,4.031631,-0.014655,7.745881,0.002604,0.959301,0.997272,10,0.498963507,turquoise,gene15679,steroid hormone receptor ERR2-like isoform X1
1213,gene15687,0.604749,0.40774,0.117798,1.159758,-0.013936,4.58316,0.001067,0.973943,0.998341,6,0.121392246,blue,gene15687,LOW QUALITY PROTEIN: allene oxide synthase-lipoxygenase protein-like
1214,gene15690,0.390891,0.271789,0.731884,1.462505,-0.122914,6.313866,0.154794,0.693996,0.984124,9,0.653182448,turquoise,gene15690,LOW QUALITY PROTEIN: sodium channel protein type 4 subunit alpha B-like
1215,gene1570,0.334634,0.299979,0.414585,1.158992,0.642664,4.000884,1.306953,0.252947,0.921675,5,0.36793711,turquoise,gene1570,uncharacterized protein LOC111109028 isoform X1
1216,gene15707,0.103069,0.0945,3.979989,48.386595,0.076834,5.27492,0.045714,0.830697,0.992241,8,0.507670805,green,gene15707,splicing factor 3B subunit 2-like
1217,gene15710,0.833065,0.539364,-0.046448,0.648976,1.915612,5.797243,10.612131,0.001123,0.230499,8,0.719844303,pink,gene15710,dual oxidase 2-like
1218,gene15729,1.00E-05,2.70E-05,0.34471,0.325766,-0.399691,6.520563,0.888827,0.345795,0.93226,9,0.645516979,blue,gene15729,calmodulin-like protein 12
1219,gene15730,0.029274,0.036818,1.722608,27.005341,0.049466,4.898654,0.008404,0.926956,0.993796,7,0.516223493,turquoise,gene15730,protein jagged-1b-like
1220,gene15751,0.115369,0.102778,-1.921453,29.349396,0.987975,5.500765,4.017737,0.045024,0.716821,8,0.671197956,turquoise,gene15751,LOW QUALITY PROTEIN: ras guanyl-releasing protein 3-like
1221,gene15753,3.00E-06,7.00E-06,7.646733,56.143902,-0.195798,5.692439,0.250741,0.616554,0.978657,8,0.490068091,magenta,gene15753,LOW QUALITY PROTEIN: AP-2 complex subunit sigma-like
1222,gene15754,0.292498,0.208616,4.505153,16.312049,0.221968,6.178159,0.128317,0.720184,0.98622,9,0.92972393,turquoise,gene15754,LOW QUALITY PROTEIN: inactive tyrosine-protein kinase 7-like
1223,gene15755,0.027116,0.03659,-2.682481,23.869125,-0.177923,4.815831,0.212948,0.644467,0.981108,7,0.382514505,blue,gene15755,LOW QUALITY PROTEIN: katanin p60 ATPase-containing subunit A-like 2
1224,gene15760,0.073556,0.080724,2.217132,25.414966,-0.952108,5.330615,1.839764,0.174979,0.891743,8,0.381580768,turquoise,gene15760,uncharacterized protein LOC111131863 isoform X1
1225,gene15761,0.358271,0.290011,1.412986,28.910053,0.115271,4.902054,0.025742,0.872533,0.993796,7,0.331665907,black,gene15761,uncharacterized protein LOC111131865
1226,gene15762,0.057182,0.076492,-3.464683,4.739927,-0.530174,4.068944,1.124973,0.28885,0.929726,5,0.446660285,brown,gene15762,uncharacterize lncRNA
1227,gene15768,0.306378,0.243567,-0.249636,0.762281,-0.330079,7.417807,1.279978,0.257903,0.924327,10,0.557683432,turquoise,gene15768,LOW QUALITY PROTEIN: prospero homeobox protein 1-like
1228,gene15769,0.13108,0.149406,-2.576774,12.278668,-0.20206,5.134491,0.388925,0.532865,0.967596,7,0.547408515,yellow,gene15769,"LOW QUALITY PROTEIN: dihydrolipoyllysine-residue succinyltransferase component of 2-oxoglutarate dehydrogenase complex, mitochondrial-like"
1229,gene15772,0.020131,0.023538,2.953898,50.628191,0.063753,5.475667,0.037517,0.846416,0.992246,8,0.582218302,black,gene15772,"LOW QUALITY PROTEIN: C-1-tetrahydrofolate synthase, cytoplasmic-like"
1230,gene15779,0.452461,0.368756,-0.258662,0.599672,-0.574186,3.696043,0.859332,0.353926,0.93226,4,0.381689292,purple,gene15779,LOW QUALITY PROTEIN: syntaxin-5-like
1231,gene15800,0.002499,0.004342,2.383609,71.698138,0.177678,7.38291,0.439497,0.507365,0.963408,10,0.680483281,black,gene15800,LOW QUALITY PROTEIN: signal recognition particle 54 kDa protein-like
1232,gene15801,0.640201,0.460936,0.083028,0.466677,-0.020204,6.986478,0.004531,0.946335,0.996593,10,0.244545431,blue,gene15801,protein phosphatase 1 regulatory subunit 14C-like
1233,gene15803,0.933217,0.574477,-0.041281,0.57697,0.424884,5.010752,1.48624,0.222801,0.911329,7,0.702931002,black,gene15803,LOW QUALITY PROTEIN: JNK1/MAPK8-associated membrane protein-like
1234,gene15805,0.00065,0.001353,2.696116,86.137545,-0.123612,6.893733,0.214991,0.642883,0.981108,10,0.528626942,blue,gene15805,LOW QUALITY PROTEIN: U4/U6.U5 tri-snRNP-associated protein 1-like
1235,gene15806,0.358555,0.264726,-0.204707,18.193357,-0.040718,4.819073,0.015215,0.901832,0.993796,7,0.41749946,turquoise,gene15806,LOW QUALITY PROTEIN: ankyrin repeat and SOCS box protein 2-like
1236,gene15808,0.005713,0.00947,-0.11536,1.26007,-0.367632,6.95772,1.127964,0.28821,0.928866,10,0.763632812,greenyellow,gene15808,LOW QUALITY PROTEIN: neuronal PAS domain-containing protein 4-like
1237,gene15809,0.274655,0.190717,-1.853894,4.29743,0.778238,8.934265,3.473587,0.062356,0.771175,10,0.933044046,black,gene15809,LOW QUALITY PROTEIN: cysteine synthase 1-like
1238,gene15811,0.29687,0.219893,-2.830266,40.909964,-0.18562,6.363101,0.383248,0.53587,0.967596,9,0.178309213,turquoise,gene15811,"uncharacterized protein LOC111129299, partial"
1239,gene15812,0.109605,0.093231,-2.199241,48.522278,0.421115,5.91716,1.409044,0.235215,0.916485,9,0.700222247,black,gene15812,protein-L-isoaspartate(D-aspartate) O-methyltransferase-like isoform X1
1240,gene15816,0.000104,0.00024,0.786604,0.905112,0.014912,8.414159,0.002191,0.962666,0.997796,10,0.243029012,brown,gene15816,uncharacterized protein LOC111131783
1241,gene15818,0.00135,0.002685,-0.164402,1.858712,-0.683819,4.952434,0.586257,0.44387,0.954654,7,0.817126405,turquoise,gene15818,potassium channel subfamily K member 2-like
1242,gene15819,0.174933,0.125146,0.530729,31.373843,0.168341,5.379082,0.274072,0.600613,0.978657,8,0.443154279,red,gene15819,LOW QUALITY PROTEIN: usherin-like
1243,gene1582,0,0,13.281926,13.51883,-0.06175,4.781232,0.027325,0.868705,0.993796,6,0.12852258,red,gene1582,phospholipid phosphatase 3-like isoform X1
1244,gene15820,0.322517,0.231539,-2.428204,39.064551,-0.534251,4.232256,1.423461,0.232835,0.916332,5,0.007957896,turquoise,gene15820,RRP15-like protein
1245,gene15823,0.139521,0.108358,3.297534,39.352643,0.24092,6.375802,0.214831,0.643007,0.981108,9,0.894457256,black,gene15823,WD repeat and HMG-box DNA-binding protein 1-like
1246,gene15825,0.441372,0.362378,0.368805,2.38209,-0.726203,5.277108,3.325707,0.068205,0.778037,8,0.522803639,brown,gene15825,"39S ribosomal protein L14, mitochondrial-like"
1247,gene15827,0.13179,0.150075,-0.2836,0.777416,1.020273,5.478739,1.322016,0.250231,0.921675,8,0.834293762,turquoise,gene15827,LOW QUALITY PROTEIN: blastula protease 10-like
1248,gene15828,0.310894,0.21354,-0.111558,47.015273,-0.108889,4.838045,0.096376,0.756222,0.987969,7,0.404271491,turquoise,gene15828,DNA polymerase delta subunit 2-like
1249,gene15829,0.24133,0.212235,-0.729432,30.796792,-0.424034,3.650651,0.463955,0.495781,0.960128,4,0.213907164,red,gene15829,uncharacterized protein LOC111131636
1250,gene1583,0.135363,0.153132,-0.33858,0.994093,0.16213,4.023304,0.066044,0.797187,0.990057,5,0.195648464,blue,gene1583,glutathione S-transferase omega-1-like
1251,gene15830,0.457279,0.332326,0.27256,28.219057,0.114493,4.905785,0.096773,0.755737,0.987969,7,0.640736949,red,gene15830,zinc finger protein-like 1
1252,gene15832,0.290528,0.209141,4.562024,31.345898,0.522749,3.691429,0.917083,0.338242,0.93226,4,0.539079514,green,gene15832,"fumarate hydratase, mitochondrial-like"
1253,gene15833,0.003124,0.005287,-1.986963,39.568123,-0.380242,5.391561,1.01085,0.314699,0.93226,8,0.639198353,turquoise,gene15833,fibroblast growth factor receptor 2-like
1254,gene15834,0.053491,0.065426,0.427986,2.432154,-0.407876,5.932153,1.090335,0.296397,0.931462,9,0.768980511,blue,gene15834,leucine-rich repeat-containing protein 74B-like
1255,gene15838,0.383744,0.257479,0.368713,0.382738,-0.234854,6.359924,0.916343,0.338437,0.93226,9,0.583146126,red,gene15838,LOW QUALITY PROTEIN: leucine-rich repeat-containing protein 74B-like
1256,gene15840,0.44468,0.33118,0.138635,0.514963,-0.51701,5.241319,2.272172,0.131715,0.863321,7,0.066176781,turquoise,gene15840,LOW QUALITY PROTEIN: leucine-rich repeat-containing protein 74B-like
1257,gene15843,0.237313,0.172151,1.183388,44.850994,0.103527,6.972509,0.019671,0.888461,0.993796,10,0.95964775,turquoise,gene15843,condensin complex subunit 1-like isoform X1
1258,gene15847,0.076668,0.088265,-0.505086,0.805965,-0.0955,5.379169,0.108549,0.741802,0.987969,8,0.089768218,turquoise,gene15847,stromelysin-1-like
1259,gene15848,0.359995,0.278181,-0.107532,0.449984,0.026706,4.334422,0.000604,0.980395,0.998474,5,0.700806103,turquoise,gene15848,protein amalgam-like
1260,gene15882,0.224895,0.179047,0.7482,44.622744,0.194091,6.950769,0.65355,0.418846,0.949529,10,0.554805808,turquoise,gene15882,ubiquitin-like modifier-activating enzyme 1 isoform X1
1261,gene15891,0.197454,0.204638,0.156639,0.700971,-0.7395,6.975729,2.977931,0.084407,0.811075,10,0.169923209,turquoise,gene15891,transient receptor potential cation channel subfamily M member 2-like
1262,gene15896,0.117902,0.101906,0.525134,29.101035,0.178343,3.279762,0.08997,0.764216,0.987969,3,0.461839806,turquoise,gene15896,MIP18 family protein FAM96A-like
1263,gene15899,0.047656,0.045468,-1.558675,37.259544,-0.456475,5.291829,0.964526,0.326049,0.93226,8,0.870421959,turquoise,gene15899,uncharacterized protein LOC111130887
1264,gene159,0.000377,0.000813,3.62,10.650338,0.068659,4.176112,0.006855,0.934014,0.994005,5,0.26635549,turquoise,gene159,calmodulin-A-like
1265,gene15902,0.15382,0.115449,0.593345,36.032089,0.5486,7.206056,1.781008,0.182026,0.893782,10,0.681998839,turquoise,gene15902,LOW QUALITY PROTEIN: DNA polymerase subunit gamma-1-like
1266,gene15906,0.151758,0.11671,4.024445,45.416779,0.198173,3.795945,0.183494,0.668388,0.983547,4,0.545210456,turquoise,gene15906,LOW QUALITY PROTEIN: BTB/POZ domain-containing protein 7-like
1267,gene15909,0.136026,0.129597,0.698707,27.87911,0.664249,3.647121,0.680998,0.409243,0.945683,4,0.78330631,turquoise,gene15909,multiple C2 and transmembrane domain-containing protein 1-like isoform X2
1268,gene15915,0,0,-12.320332,47.337147,-1.309934,4.779721,8.076485,0.004484,0.384978,6,0.442659613,blue,gene15915,uncharacterized protein LOC111128433
1269,gene15917,0.120685,0.110646,6.073145,22.232255,0.265773,3.576902,0.20967,0.647026,0.981108,3,0.498991094,turquoise,gene15917,LOW QUALITY PROTEIN: uncharacterized protein LOC111129908
1270,gene15924,0,0,13.086793,69.507604,-0.492043,4.906813,0.546776,0.459638,0.956091,7,0.808206553,turquoise,gene15924,zinc finger protein 687a-like
1271,gene15925,0.000185,0.000417,2.867365,85.683757,-0.012297,4.101196,0.000713,0.978703,0.998341,5,0.026526818,red,gene15925,lysine-specific demethylase 8-like
1272,gene1593,0.038279,0.041725,0.04407,55.095213,-0.026457,7.097878,0.015317,0.901505,0.993796,10,0.836942022,green,gene1593,rho GTPase-activating protein 190-like isoform X1
1273,gene15931,0,0,3.423864,4.186292,-0.56014,8.503199,4.4063,0.035806,0.692337,10,0.373967514,purple,gene15931,tetraspanin-18-like
1274,gene15933,0.000282,0.000592,5.416379,61.174105,-0.755637,5.725163,0.697985,0.403461,0.944652,8,0.435569482,turquoise,gene15933,lactoylglutathione lyase-like
1275,gene15935,0.257772,0.202682,1.913026,6.919047,0.369947,3.808818,0.698882,0.40316,0.944652,4,0.129172387,red,gene15935,consortin-like
1276,gene15939,0.026442,0.039597,-2.648031,49.078346,0.27845,4.614649,0.311443,0.576796,0.976325,6,0.754592239,red,gene15939,uncharacterized protein LOC111129520
1277,gene15942,0.199461,0.131544,1.985582,49.402673,0.986785,4.222858,5.52325,0.018765,0.57012,5,0.3401664,turquoise,gene15942,thyroid adenoma-associated protein homolog isoform X1
1278,gene15943,0.13155,0.110276,0.350764,32.509053,0.791846,5.470039,1.580839,0.20864,0.90532,8,0.899257593,turquoise,gene15943,pleckstrin homology domain-containing family H member 1-like isoform X1
1279,gene15945,0.046305,0.049435,-3.248049,58.840364,-0.551822,3.802646,1.776605,0.182567,0.893782,4,0.385860755,turquoise,gene15945,methyltransferase-like protein 25 isoform X1
1280,gene15949,0.022529,0.024172,-4.090254,47.230707,-0.332062,7.937458,1.542197,0.214291,0.908809,10,0.565328781,brown,gene15949,PiggyBac transposable element-derived protein 4
1281,gene1595,0,0,-13.717926,51.320903,0.302028,3.700753,0.254212,0.614125,0.978657,4,0.263207838,brown,gene1595,GTP-binding protein 10 homolog
1282,gene15952,1.00E-06,3.00E-06,0.577315,38.096178,-1.761399,4.471578,7.496411,0.006182,0.421139,6,0.617168059,turquoise,gene15952,nucleolar and spindle-associated protein 1-like isoform X1
1283,gene15953,0.10458,0.086603,0.204079,38.508126,0.649981,5.045592,1.252972,0.262986,0.925081,7,0.776910046,turquoise,gene15953,tricalbin-1-like isoform X6
1284,gene15956,0.272042,0.209866,2.979464,42.043606,0.30944,3.338175,0.227813,0.63315,0.980774,3,0.580922662,black,gene15956,uncharacterize lncRNA
1285,gene15957,0.198341,0.155447,2.915568,33.198908,-0.501285,3.409487,1.009123,0.315113,0.93226,3,0.595728211,turquoise,gene15957,BTB/POZ domain-containing protein 7-like
1286,gene15961,0.086576,0.076847,-9.016921,33.71542,-0.048539,6.141634,0.040672,0.840172,0.992241,9,0.422224068,turquoise,gene15961,C-myc promoter-binding protein-like isoform X1
1287,gene15968,0.134676,0.12857,-0.787592,1.90175,-0.465749,3.404832,0.540797,0.462103,0.956091,3,0.176631251,turquoise,gene15968,uncharacterize lncRNA
1288,gene15970,0.624786,0.454394,0.31275,4.051407,-0.220188,8.317702,1.29237,0.255612,0.921701,10,0.429712491,turquoise,gene15970,nuclear receptor subfamily 2 group F member 1-A-like isoform X1
1289,gene15972,0.24846,0.163294,2.360741,38.50051,0.262067,6.166085,1.034908,0.309009,0.93226,9,0.475796882,purple,gene15972,LOW QUALITY PROTEIN: uncharacterized protein LOC111129310
1290,gene15974,0,0,19.164619,12.18021,0.323386,4.983426,0.683235,0.408475,0.945588,7,0.49214826,turquoise,gene15974,LOW QUALITY PROTEIN: thioredoxin domain-containing protein 16-like
1291,gene15975,0.153056,0.138897,-0.873896,22.529415,0.546391,5.712012,0.768926,0.38055,0.939089,8,0.78563232,turquoise,gene15975,transient receptor potential cation channel subfamily M member 1-like isoform X1
1292,gene15987,0.908357,0.566179,0.061765,1.136623,0.552395,4.203013,1.795049,0.180312,0.893782,5,0.457987711,yellow,gene15987,4-coumarate--CoA ligase-like
1293,gene15988,0.008951,0.014084,3.523938,65.053833,0.549995,5.018121,3.003713,0.083074,0.811075,7,0.555274859,red,gene15988,ubiquitin thioesterase OTUB1-like
1294,gene15989,0.055888,0.075046,0.963226,4.170439,1.447271,4.745245,4.580956,0.032329,0.666821,6,0.31981954,turquoise,gene15989,adenylate cyclase type 10-like
1295,gene15992,0.028291,0.033962,-0.656862,32.928196,0.827587,6.110518,2.769111,0.0961,0.825168,9,0.778103839,turquoise,gene15992,lysosomal-trafficking regulator-like isoform X1
1296,gene15997,0.171201,0.159649,0.524259,20.05217,0.583566,3.927205,1.078692,0.29899,0.931462,4,0.694141181,green,gene15997,CREB-regulated transcription coactivator 1-like isoform X1
1297,gene16010,0.11916,0.115528,0.577474,23.711459,0.258987,8.619827,0.496117,0.481211,0.959052,10,0.560739379,turquoise,gene16010,LOW QUALITY PROTEIN: insulin-like peptide receptor
1298,gene16016,0.16585,0.178929,-0.169472,0.693644,0.820222,3.782142,2.249949,0.133619,0.863321,4,0.515612706,black,gene16016,LOW QUALITY PROTEIN: von Willebrand factor A domain-containing protein 5A-like
1299,gene16023,0.005148,0.009247,0.853517,6.338587,0.451078,9.080923,0.792814,0.373251,0.938627,10,0.947177301,black,gene16023,LOW QUALITY PROTEIN: rap guanine nucleotide exchange factor 4-like
1300,gene16024,0.017396,0.023912,-2.385822,45.679443,0.490863,6.111386,1.08568,0.29743,0.931462,9,0.795263495,red,gene16024,LOW QUALITY PROTEIN: cilia- and flagella-associated protein 61-like
1301,gene16028,0.065004,0.067671,0.459472,10.777206,0.376312,6.493577,0.512514,0.474053,0.957213,9,0.879553568,black,gene16028,LOW QUALITY PROTEIN: N-alpha-acetyltransferase 20-like
1302,gene1603,0.308534,0.190648,2.539362,12.475689,-1.344229,3.780683,7.209545,0.007252,0.448447,4,0.269485673,turquoise,gene1603,uncharacterized protein LOC111118939 isoform X1
1303,gene16030,0.000346,0.000719,5.019442,61.374878,-0.221424,7.579041,0.772208,0.379535,0.939089,10,0.479352265,turquoise,gene16030,LOW QUALITY PROTEIN: vasodilator-stimulated phosphoprotein-like
1304,gene16036,0.934312,0.574821,-0.047865,0.796235,-1.195367,5.114258,4.511157,0.033674,0.672844,7,0.354470691,brown,gene16036,uncharacterize lncRNA
1305,gene16041,0.064525,0.084346,-0.202872,0.848189,0.019668,6.017587,0.002844,0.957471,0.997184,9,0.274506199,yellow,gene16041,uncharacterized protein LOC111130518
1306,gene16043,0,0,18.304312,15.852422,-0.070466,5.253437,0.015469,0.901018,0.993796,8,0.066502801,turquoise,gene16043,LOW QUALITY PROTEIN: uncharacterized protein LOC111127847
1307,gene16051,0.130907,0.149294,1.757123,9.543523,0.159332,4.591463,0.08646,0.768727,0.987969,6,0.542477276,black,gene16051,LOW QUALITY PROTEIN: fibroleukin-like
1308,gene16056,0.274444,0.194114,-4.490748,18.815911,0.210911,5.24915,0.351478,0.553277,0.972392,8,0.420592115,brown,gene16056,signal recognition particle 14 kDa protein-like
1309,gene16057,0.058635,0.058516,3.85191,10.167385,0.135122,5.519142,0.219034,0.639777,0.981108,8,0.565349019,pink,gene16057,LOW QUALITY PROTEIN: zinc finger CCCH domain-containing protein 14-like
1310,gene16059,0.008154,0.013999,0.132992,0.479236,0.621219,5.342514,1.571208,0.210032,0.905386,8,0.830771861,black,gene16059,LOW QUALITY PROTEIN: very-long-chain (3R)-3-hydroxyacyl-CoA dehydratase-like
1311,gene1606,0.631573,0.444336,-0.028137,4.653153,0.559804,4.287416,0.356651,0.550372,0.970912,5,0.872455473,turquoise,gene1606,"N-acetyllactosaminide beta-1,6-N-acetylglucosaminyl-transferase-like isoform X1"
1312,gene16061,0,0,6.757216,85.965167,-0.215879,6.728831,0.807975,0.36872,0.937803,10,0.328413918,green,gene16061,calcium-independent protein kinase C-like isoform X1
1313,gene16063,0.126375,0.125069,-3.140488,75.919658,-0.039799,4.621478,0.011474,0.914695,0.993796,6,0.432067507,blue,gene16063,LOW QUALITY PROTEIN: microtubule-associated protein 10-like
1314,gene16065,0.014645,0.022642,-1.59543,7.670249,-0.235229,6.385562,0.591323,0.441908,0.953855,9,0.29651824,red,gene16065,rho-related GTP-binding protein RhoU-like
1315,gene16067,0.197851,0.146821,-0.268736,0.952724,-0.1222,5.690143,0.121082,0.727864,0.986238,8,0.070574573,turquoise,gene16067,LOW QUALITY PROTEIN: homeobox protein SIX4-like
1316,gene16068,0.236696,0.190159,1.881794,22.060549,0.085353,5.139696,0.052425,0.818897,0.992241,7,0.355244294,turquoise,gene16068,uridine diphosphate glucose pyrophosphatase-like isoform X1
1317,gene16069,0.016842,0.024381,-0.898708,36.966322,0.24114,5.161411,0.603482,0.437252,0.953855,7,0.352837496,turquoise,gene16069,LOW QUALITY PROTEIN: E3 ubiquitin-protein ligase UBR2-like
1318,gene1608,0.859203,0.54891,0.172895,2.477341,-0.262397,4.372699,0.146152,0.70224,0.985024,6,0.741211678,turquoise,gene1608,uncharacterized protein CG43867-like
1319,gene16081,0,0,17.529172,77.733342,-0.720862,5.01063,2.855188,0.09108,0.818998,7,-0.04248266,turquoise,gene16081,CDK-activating kinase assembly factor MAT1-like
1320,gene16087,0,0,12.19895,70.830617,0.054655,6.700653,0.024869,0.874693,0.993796,9,0.302979577,blue,gene16087,"sushi, von Willebrand factor type A, EGF and pentraxin domain-containing protein 1-like"
1321,gene16088,0,0,23.271049,58.874724,-0.503136,3.327624,0.84238,0.358717,0.93226,3,0.484338646,yellow,gene16088,"beta-1,4-glucuronyltransferase 1-like"
1322,gene16095,0.367144,0.31982,0.996714,5.548941,-0.214305,4.107725,0.269976,0.603348,0.978657,5,0.549482571,yellow,gene16095,DNA polymerase kappa-like isoform X1
1323,gene16098,0.29171,0.189456,3.212664,23.207588,-0.382165,4.40959,0.800673,0.370892,0.937803,6,0.504858873,turquoise,gene16098,uncharacterized protein LOC111131594 isoform X1
1324,gene161,0.122974,0.141949,-0.430163,0.491658,-0.217023,5.884105,0.37781,0.538778,0.96884,9,0.390982337,turquoise,gene161,"LOW QUALITY PROTEIN: protocadherin Fat 4-like, partial"
1325,gene16107,0,0,-12.553503,62.497343,-0.37876,6.128832,1.0944,0.295498,0.931462,9,0.70209799,blue,gene16107,coiled-coil domain-containing protein 87-like isoform X1
1326,gene16108,1.00E-05,2.40E-05,-7.879809,61.53018,0.21735,3.962021,0.114005,0.735629,0.986959,5,0.795502174,turquoise,gene16108,tRNA (adenine(37)-N6)-methyltransferase-like
1327,gene16111,0.321369,0.237196,3.226146,11.633223,-0.072735,7.891405,0.113829,0.735827,0.986959,10,0.541147531,green,gene16111,secretory carrier-associated membrane protein 1-like isoform X1
1328,gene16112,0.156059,0.143106,-1.412267,39.859558,-0.068301,5.385714,0.033952,0.85381,0.993016,8,0.094675426,turquoise,gene16112,AP-3 complex subunit beta-2-like isoform X1
1329,gene16115,0,0,1.332259,18.171281,-0.166743,6.986895,0.559548,0.454443,0.956091,10,-0.026902177,turquoise,gene16115,LOW QUALITY PROTEIN: zinc finger RNA-binding protein-like
1330,gene16121,0,0,-6.066557,64.143964,-0.131275,5.638377,0.176894,0.674056,0.983547,8,0.389741227,red,gene16121,cactin-like
1331,gene16124,0.405334,0.316163,0.252641,0.470845,0.993334,3.813853,2.800108,0.094258,0.824371,4,0.463943503,turquoise,gene16124,"phenylalanine--tRNA ligase, mitochondrial-like"
1332,gene16128,0,0,-13.711715,64.041407,-0.360522,5.181605,1.605693,0.205098,0.904435,7,0.681848094,green,gene16128,menin-like
1333,gene16133,0.406905,0.342493,0.326021,1.288659,0.038727,5.363983,0.001687,0.967239,0.998341,8,0.596189888,turquoise,gene16133,uncharacterized protein LOC111128727
1334,gene16137,0.261592,0.249457,0.213937,0.940588,-0.873159,5.190032,1.358095,0.243868,0.920765,7,0.43233019,turquoise,gene16137,uncharacterized protein LOC111129129
1335,gene16143,0.701154,0.487634,0.253542,0.942409,0.011606,3.871216,0.000349,0.985101,0.999054,4,0.311999392,red,gene16143,nuclear distribution protein nudE-like 1
1336,gene16144,0,0,-9.278408,34.620559,0.180455,3.742422,0.124197,0.724526,0.98622,4,0.560435055,green,gene16144,LOW QUALITY PROTEIN: uncharacterized protein LOC111128724
1337,gene16146,0,0,10.436792,34.875159,0.193509,3.805948,0.097454,0.754906,0.987969,4,0.338344782,turquoise,gene16146,"3\'(2\'),5\'-bisphosphate nucleotidase 1-like"
1338,gene16153,0,0,6.424293,84.630541,-0.102708,6.812535,0.106259,0.744444,0.987969,10,0.729172053,blue,gene16153,"LOW QUALITY PROTEIN: centriole, cilia and spindle-associated protein-like"
1339,gene16160,0.611676,0.448232,-0.099886,0.365412,0.29116,3.909925,0.079039,0.778604,0.988002,4,0.44509701,turquoise,gene16160,arrestin domain-containing protein 3-like
1340,gene16166,0.352141,0.252899,-0.069074,0.493425,-0.054025,6.656276,0.049264,0.824348,0.992241,9,0.346666213,yellow,gene16166,transcriptional repressor p66-beta-like
1341,gene16167,0.081863,0.092071,0.813,69.313008,-0.141334,4.84325,0.134946,0.713358,0.98622,7,0.584207543,green,gene16167,E3 ubiquitin-protein ligase NEDD4-like isoform X1
1342,gene16173,0.047199,0.065224,-0.245447,0.984344,-0.134661,6.235216,0.170165,0.679965,0.983547,9,0.490540586,turquoise,gene16173,ankycorbin-like isoform X1
1343,gene16174,0.025906,0.038924,3.284923,37.145562,-0.485109,5.506215,0.73398,0.391596,0.941104,8,0.783493985,turquoise,gene16174,LOW QUALITY PROTEIN: furin-like protease kpc-1
1344,gene16178,0,0,-14.396339,19.930302,0.775489,10.428067,2.511169,0.113042,0.840276,10,0.97212347,black,gene16178,LOW QUALITY PROTEIN: WD repeat-containing protein 93-like
1345,gene1618,0.144251,0.107989,3.973645,14.607052,0.611489,4.040454,0.905756,0.341243,0.93226,5,0.395014875,turquoise,gene1618,zinc finger protein 26-like isoform X2
1346,gene16181,0.142314,0.158421,-0.180546,0.642074,-0.684506,4.132338,1.855071,0.173195,0.891743,5,0.393267005,turquoise,gene16181,ankyrin repeat and death domain-containing protein 1A-like isoform X1
1347,gene16191,0.3039,0.223378,0.011784,1.865636,1.200479,7.686985,1.433589,0.23118,0.916332,10,0.225265144,turquoise,gene16191,putative uncharacterized protein DDB_G0282133 isoform X2
1348,gene16195,0.320879,0.266637,0.089052,1.810717,0.229203,6.060468,0.228006,0.633006,0.980774,9,0.816917561,turquoise,gene16195,Paired box protein Pax-9
1349,gene16197,0.068121,0.076962,2.298336,5.082633,-0.02222,7.198073,0.009526,0.922251,0.993796,10,0.632069254,green,gene16197,LOW QUALITY PROTEIN: uncharacterized protein LOC111129082
1350,gene16198,0.035248,0.041992,-1.721715,42.810746,0.053838,6.24406,0.020434,0.886331,0.993796,9,0.783720649,turquoise,gene16198,uncharacterized protein LOC111130178 isoform X1
1351,gene16211,0.57464,0.430702,0.077613,1.525949,0.546581,4.906805,0.981573,0.321811,0.93226,7,0.38411062,turquoise,gene16211,LOW QUALITY PROTEIN: spatacsin-like
1352,gene16215,0.026066,0.033111,-0.580469,24.38756,-0.44738,5.491872,0.555072,0.456253,0.956091,8,-0.078074365,turquoise,gene16215,uncharacterized protein LOC111130029 isoform X1
1353,gene16218,0,0,5.493372,43.841874,-0.293593,3.563177,0.113806,0.735852,0.986959,3,0.453588517,blue,gene16218,uncharacterized protein LOC111130815
1354,gene1622,0.207781,0.152654,-3.166622,25.933227,-0.257926,7.172381,1.05587,0.304159,0.93226,10,0.41231162,red,gene1622,protein lap4-like isoform X5
1355,gene16222,8.50E-05,0.000198,-1.923855,10.553441,-0.340461,3.547485,0.276681,0.598885,0.978657,3,0.41797515,grey,gene16222,uncharacterized protein LOC111130464
1356,gene16240,0.311564,0.244064,-0.622371,6.51889,-0.148866,4.955648,0.084247,0.771623,0.987969,7,0.458186302,black,gene16240,uncharacterized protein LOC111129760
1357,gene16256,0.380426,0.271395,-0.630114,1.745854,1.519714,3.962334,7.799927,0.005225,0.403168,5,0.22232962,turquoise,gene16256,uncharacterize lncRNA
1358,gene16258,0.169532,0.147512,-0.502317,65.046772,0.237252,5.277096,0.185035,0.667082,0.983547,8,0.157516639,brown,gene16258,calpain-B-like isoform X1
1359,gene16262,0.031934,0.046604,-0.585972,4.007166,0.248286,3.648293,0.183421,0.668449,0.983547,4,0.57037209,greenyellow,gene16262,uncharacterized protein LOC111129306
1360,gene16265,0.005672,0.009406,7.458653,13.479072,-0.384294,3.316356,0.465948,0.494857,0.960128,3,0.196206832,turquoise,gene16265,centrin-3
1361,gene1627,0,0,24.752452,35.79723,-0.890649,4.764723,3.03113,0.081681,0.809112,6,0.23898099,brown,gene1627,nucleoporin-like protein 2
1362,gene16270,0.137911,0.135393,2.690476,39.186496,1.250441,4.042524,4.159397,0.041404,0.699822,5,0.504250981,turquoise,gene16270,uncharacterized protein LOC111127810 isoform X1
1363,gene16277,0.340441,0.249629,0.164994,5.41763,0.363302,4.663584,0.367795,0.544209,0.969301,6,0.564329378,red,gene16277,organic cation transporter protein-like
1364,gene16283,0.507007,0.356872,2.046826,9.458773,0.473317,3.939125,0.683126,0.408512,0.945588,4,0.180127871,turquoise,gene16283,organic cation transporter protein-like
1365,gene1630,0.548475,0.387465,0.212754,88.553582,-0.412493,6.372507,1.963484,0.161141,0.884593,9,0.083906681,turquoise,gene1630,survival of motor neuron-related-splicing factor 30-like isoform X1
1366,gene16302,0,0,9.40039,36.862308,-0.681898,3.634872,1.021616,0.312136,0.93226,4,0.666749363,turquoise,gene16302,multiple C2 and transmembrane domain-containing protein 1-like isoform X1
1367,gene16303,0.288224,0.237733,-1.780939,10.768151,-0.321619,7.025481,0.455172,0.499889,0.960259,10,0.327046057,blue,gene16303,uncharacterize lncRNA
1368,gene1631,0.327701,0.264059,-0.438127,0.742922,0.359617,5.302817,1.036105,0.308729,0.93226,8,0.456601248,yellow,gene1631,sorting nexin-17-like
1369,gene16365,0.052813,0.071591,0.445387,0.396442,-1.699986,9.440222,3.25165,0.071352,0.785145,10,0.574087835,grey,gene16365,angiopoietin-related protein 7-like isoform X4
1370,gene16366,0.301758,0.222116,1.487748,6.405145,0.253989,3.615203,0.228502,0.632637,0.980774,4,0.057659687,turquoise,gene16366,uncharacterized protein LOC111128198
1371,gene16367,0.032734,0.03764,1.304114,12.095698,0.172205,5.751682,0.134081,0.714238,0.98622,8,0.801779229,turquoise,gene16367,ADAMTS-like protein 4 isoform X1
1372,gene16368,0,1.00E-06,-14.785794,65.632697,0.538885,4.314271,1.409199,0.235189,0.916485,5,0.568863452,pink,gene16368,uncharacterized protein LOC111131337
1373,gene16372,0.016397,0.026078,-4.925184,26.592012,-0.40632,4.44639,0.914843,0.338833,0.93226,6,0.472772212,turquoise,gene16372,uncharacterized protein LOC111130569 isoform X1
1374,gene16374,0.417651,0.270102,4.23284,37.421552,0.309194,4.662427,0.242301,0.622549,0.979778,6,0.376454182,turquoise,gene16374,solute carrier family 12 member 2-like isoform X2
1375,gene16381,0.414011,0.268329,1.91342,42.933447,0.450119,3.688309,0.654402,0.418543,0.949526,4,0.460994984,red,gene16381,poly
1376,gene16404,0.015385,0.021344,3.373518,28.853986,-1.143196,4.085978,1.958961,0.161624,0.885762,5,0.570162808,turquoise,gene16404,cleavage and polyadenylation specificity factor subunit 2-like
1377,gene16410,0.636627,0.459594,0.25321,2.183436,1.396616,3.289851,6.02609,0.014096,0.53586,3,0.546655491,pink,gene16410,uncharacterized protein LOC111131853 isoform X1
1378,gene16418,0.179017,0.189693,0.648451,82.106879,0.40677,4.914874,0.896102,0.343829,0.93226,7,0.352860435,turquoise,gene16418,"threonine--tRNA ligase, cytoplasmic-like isoform X1"
1379,gene16438,0.590004,0.438017,-0.427848,36.55135,0.310921,5.996981,0.999959,0.31732,0.93226,9,0.327932991,brown,gene16438,peroxisomal multifunctional enzyme type 2-like
1380,gene16440,0.001037,0.002004,-1.995043,42.51781,0.102396,6.267781,0.178343,0.672801,0.983547,9,0.1373256,turquoise,gene16440,serine/threonine-protein kinase D1-like isoform X1
1381,gene16444,0.19917,0.154451,-0.586099,34.954209,0.080951,3.760612,0.031464,0.85921,0.993244,4,0.182069239,black,gene16444,adipocyte plasma membrane-associated protein-like
1382,gene16446,0,0,-7.614675,60.649157,0.237966,5.240519,0.626467,0.428654,0.951656,7,0.400170982,black,gene16446,desumoylating isopeptidase 2-like
1383,gene16447,0,0,0.153686,25.288867,0.459024,4.150359,0.967877,0.32521,0.93226,5,0.32675222,magenta,gene16447,galactosylgalactosylxylosylprotein 3-beta-glucuronosyltransferase 1-like
1384,gene16448,5.50E-05,0.000123,8.461466,16.377594,0.817775,3.691798,2.214342,0.136733,0.863321,4,0.425364051,black,gene16448,LOW QUALITY PROTEIN: non-lysosomal glucosylceramidase-like
1385,gene16452,2.30E-05,5.50E-05,-1.969102,3.169186,0.050838,3.674497,0.008087,0.928345,0.993796,4,0.492598744,magenta,gene16452,nuclear receptor 2C2-associated protein-like
1386,gene16455,0.500593,0.393878,0.317665,1.120945,0.427101,4.001576,0.991648,0.31934,0.93226,5,0.407960989,pink,gene16455,LOW QUALITY PROTEIN: uncharacterized protein LOC111129784
1387,gene16460,0.131273,0.149596,0.854621,2.168469,-0.335387,4.200419,0.572246,0.449368,0.956091,5,0.353344341,yellow,gene16460,uncharacterized protein LOC111130242
1388,gene16461,0.166283,0.131711,2.339926,3.088636,-0.375617,5.181972,0.754595,0.385025,0.93925,7,0.648978037,blue,gene16461,type I iodothyronine deiodinase-like
1389,gene16475,0.163906,0.126754,-3.720625,28.523087,-0.574737,3.502044,0.767513,0.380987,0.939186,3,0.497444862,turquoise,gene16475,uncharacterized protein LOC111130167
1390,gene16477,0.111787,0.102861,-2.472387,58.641198,-0.077054,7.5913,0.143142,0.705177,0.985225,10,0.449549238,green,gene16477,chromodomain-helicase-DNA-binding protein 1-like isoform X1
1391,gene16478,0.805009,0.528943,0.163319,5.787939,-0.291644,3.289902,0.26467,0.60693,0.978657,3,0.264204758,yellow,gene16478,"LOW QUALITY PROTEIN: alanine--tRNA ligase, cytoplasmic-like"
1392,gene16487,0,0,-57.557189,31.549481,-0.821406,4.757967,2.567542,0.109077,0.840208,6,0.631849316,turquoise,gene16487,lysine-rich nucleolar protein 1-like
1393,gene16492,0,0,18.839156,35.464467,0.304122,8.169636,0.354547,0.55155,0.971818,10,0.945610728,black,gene16492,uncharacterized protein LOC111129789
1394,gene16493,0.488468,0.387723,-0.104689,0.779637,0.418561,3.959186,0.281242,0.595889,0.978657,4,0.229759484,turquoise,gene16493,uncharacterized protein LOC111131779
1395,gene16495,0.288193,0.220314,-0.72302,0.627018,-0.39765,4.279189,0.174269,0.676345,0.983547,5,0.649019736,turquoise,gene16495,LOW QUALITY PROTEIN: deleted in malignant brain tumors 1 protein-like
1396,gene165,0.046587,0.057099,-1.671343,2.385866,-0.772407,4.407934,1.699443,0.192361,0.89842,6,0.350053724,red,gene165,"UDP-GalNAc:beta-1,3-N-acetylgalactosaminyltransferase 1-like"
1397,gene1650,0.465585,0.371967,-0.118603,0.884777,0.53903,3.364869,1.250475,0.263462,0.925081,3,0.375178784,turquoise,gene1650,two pore potassium channel protein sup-9-like
1398,gene16512,0.35302,0.311086,-0.125233,1.355658,0.687538,4.557474,1.331915,0.248465,0.921675,6,0.544932647,blue,gene16512,uncharacterized protein LOC111131785 isoform X1
1399,gene16514,0.103965,0.108865,-1.103132,41.665947,-0.184858,7.303368,0.315054,0.574595,0.976289,10,0.926626953,blue,gene16514,LOW QUALITY PROTEIN: spermatogenesis-associated protein 17-like
1400,gene16515,0.023441,0.035683,1.025268,1.069906,-0.190512,5.320642,0.240658,0.623731,0.979812,8,0.689919123,blue,gene16515,uncharacterized protein C2orf73 homolog isoform X1
1401,gene16519,0.23132,0.230393,-0.344221,0.748559,-0.170058,5.821071,0.307216,0.579394,0.977018,8,0.3505651,turquoise,gene16519,uncharacterized protein LOC111130662
1402,gene16536,0.385468,0.330443,0.197522,1.146158,0.149957,4.07733,0.055422,0.813884,0.991991,5,0.647251286,turquoise,gene16536,acetylcholine receptor subunit alpha-like 1
1403,gene16549,0,0,-8.052957,51.457347,-0.643336,8.360275,0.345675,0.556572,0.97429,10,0.312602395,pink,gene16549,uncharacterize lncRNA
1404,gene16556,0.033378,0.040196,-1.12163,31.154889,0.002377,6.653007,9.00E-06,0.997582,0.999704,9,0.878512029,turquoise,gene16556,LOW QUALITY PROTEIN: S phase cyclin A-associated protein in the endoplasmic reticulum-like
1405,gene16558,0.492841,0.36978,0.005398,0.453811,-0.516486,3.654388,0.669269,0.413306,0.946503,4,0.655846058,turquoise,gene16558,insulin gene enhancer protein isl-1-like isoform X1
1406,gene16564,6.80E-05,0.00016,-6.295855,45.19769,-0.375442,6.589367,1.064468,0.302198,0.93226,9,0.553743404,turquoise,gene16564,receptor expression-enhancing protein 5-like isoform X1
1407,gene1657,0.142581,0.112369,0.450283,2.346424,-1.317217,3.479196,5.747981,0.016508,0.541854,3,0.432138482,blue,gene1657,uncharacterized protein LOC111109105 isoform X1
1408,gene16576,0,0,23.359889,51.966218,-2.162731,3.908413,4.848207,0.027675,0.636564,4,0.054331044,turquoise,gene16576,uncharacterized protein LOC111128643
1409,gene16577,0.221987,0.159525,1.165643,30.91126,-0.466168,3.603687,0.480779,0.48807,0.959339,4,0.372779107,purple,gene16577,centrosomal protein of 120 kDa-like
1410,gene16578,0.195013,0.166532,2.517255,44.630075,-0.674879,3.803323,1.438299,0.230415,0.916224,4,0.331150538,turquoise,gene16578,casein kinase I-like isoform X1
1411,gene16587,0.048597,0.058926,-7.471645,0.74652,-1.531463,4.706888,7.118252,0.00763,0.462031,6,0.41184975,yellow,gene16587,calmodulin-like protein 12
1412,gene16588,0.835474,0.540282,0.122347,1.262231,-0.328625,5.642046,0.68526,0.407781,0.945588,8,0.677197603,magenta,gene16588,calcium-binding protein LPS1-alpha-like
1413,gene1661,0.080508,0.087475,-2.813426,4.946041,0.289281,7.056483,0.280828,0.596159,0.978657,10,0.261194579,black,gene1661,LOW QUALITY PROTEIN: melatonin receptor type 1B-A-like
1414,gene16620,0.034445,0.049801,1.041459,64.037566,-0.904872,3.843057,2.722436,0.098947,0.825168,4,0.723842784,grey,gene16620,uncharacterized protein C1orf43 homolog
1415,gene16628,0.214157,0.217705,-1.437844,86.097843,-0.228102,4.840247,0.131774,0.7166,0.98622,7,0.441930581,magenta,gene16628,"LOW QUALITY PROTEIN: threonine--tRNA ligase, cytoplasmic-like"
1416,gene16636,0.515081,0.401502,-0.465762,4.644242,1.336734,3.491838,4.775577,0.028866,0.647873,3,0.580055131,pink,gene16636,uncharacterized protein LOC111128624 isoform X1
1417,gene16643,0.216366,0.154955,6.711727,16.201029,0.310115,4.71332,0.611368,0.434273,0.953499,6,0.344815964,turquoise,gene16643,cleavage and polyadenylation specificity factor subunit 2-like
1418,gene1665,0.002144,0.004132,0.282695,0.509263,-0.52249,4.881309,1.064526,0.302185,0.93226,7,0.467185293,yellow,gene1665,glutathione S-transferase-like
1419,gene1666,0.242733,0.206472,-0.578543,2.709553,0.404963,4.452845,0.419508,0.517182,0.965262,6,0.62169693,turquoise,gene1666,hemicentin-1-like isoform X1
1420,gene16675,0.522484,0.393986,-0.088049,12.734868,0.430269,4.725346,0.534596,0.464681,0.956091,6,0.698590333,turquoise,gene16675,polycystic kidney disease protein 1-like 2 isoform X1
1421,gene1668,0.980648,0.590265,-0.018643,76.946069,-0.185263,6.07791,0.206332,0.649658,0.981108,9,0.556170273,blue,gene1668,uncharacterized protein LOC111110178
1422,gene167,0,0,-0.354734,1.918788,-0.752305,4.636089,1.145861,0.284417,0.928733,6,0.744347648,greenyellow,gene167,"beta-1,3-galactosyltransferase brn-like"
1423,gene1670,0.114334,0.085873,19.456847,22.425421,-0.401635,4.375854,1.041448,0.307485,0.93226,6,0.261337869,turquoise,gene1670,sorting nexin-33-like isoform X1
1424,gene16709,0.337784,0.302024,0.63582,1.867876,0.263178,4.586882,0.323845,0.569306,0.975354,6,0.178175025,black,gene16709,dnaJ homolog subfamily A member 2-like
1425,gene1671,0.12146,0.11943,1.346936,21.822564,0.768956,4.70811,2.830565,0.092486,0.82316,6,0.633612565,turquoise,gene1671,transient receptor potential cation channel subfamily M member 1-like isoform X1
1426,gene16713,0.95617,0.582134,0.121082,52.774109,-0.041011,3.7385,0.002542,0.959788,0.997272,4,0.472425912,yellow,gene16713,xaa-Pro dipeptidase-like
1427,gene16735,0.014677,0.021665,3.128859,27.416374,-0.105947,3.615615,0.04456,0.832814,0.992241,4,0.179416315,turquoise,gene16735,tumor necrosis factor receptor superfamily member 1B-like isoform X1
1428,gene16738,0.805597,0.529147,0.092396,0.782391,0.382094,4.474888,1.082967,0.298035,0.931462,6,0.220333878,blue,gene16738,coiled-coil domain-containing protein 115-like
1429,gene16740,0.245656,0.240546,-1.03887,23.28899,-0.10046,6.056493,0.107352,0.743179,0.987969,9,0.768063931,purple,gene16740,girdin-like isoform X11
1430,gene16744,0.967729,0.586038,0.014262,21.703023,1.027572,3.698951,3.45371,0.06311,0.771175,4,0.130915963,turquoise,gene16744,peroxisomal acyl-coenzyme A oxidase 3-like
1431,gene1675,0,0,37.21362,32.946825,0.419064,3.229869,0.493951,0.48217,0.959087,3,0.671353697,red,gene1675,zinc transporter 2-like
1432,gene16768,0.057467,0.076822,-0.479652,0.592176,0.265912,3.208319,0.235759,0.627286,0.980662,2,0.538563941,turquoise,gene16768,uncharacterized protein LOC111135973
1433,gene1677,0,0,10.548554,40.028948,0.123954,5.412658,0.160242,0.688934,0.98412,8,0.389312586,turquoise,gene1677,DNA damage-binding protein 1-like
1434,gene1678,0,0,-2.33758,89.591094,0.158537,5.062099,0.169937,0.680168,0.983547,7,0.436497038,yellow,gene1678,X-ray repair cross-complementing protein 5-like
1435,gene16791,0.001108,0.002231,2.842906,52.871606,-0.683283,4.332294,2.783452,0.095243,0.825168,5,0.456442674,blue,gene16791,uncharacterized protein LOC111137683
1436,gene16794,0.173122,0.184911,1.106014,7.043066,-0.511727,3.350652,0.545669,0.460093,0.956091,3,0.249924628,green,gene16794,cytochrome P450 4A25-like
1437,gene16795,0.613186,0.44893,-0.510506,10.794678,-0.617944,3.97849,0.856187,0.354808,0.93226,5,0.097624058,red,gene16795,phylloquinone omega-hydroxylase CYP4F2-like
1438,gene16796,0.741253,0.503752,-0.368851,54.786685,-0.587137,4.768064,1.34492,0.246168,0.921229,6,0.550455694,brown,gene16796,"39S ribosomal protein L12, mitochondrial-like"
1439,gene1680,9.10E-05,2.00E-04,-13.623988,52.8465,-0.141431,5.073402,0.102279,0.749111,0.987969,7,0.458369063,turquoise,gene1680,tudor domain-containing protein 7-like
1440,gene16800,0.477501,0.381923,0.320063,35.981468,-0.725142,3.994176,2.909396,0.088065,0.816895,5,0.242739387,turquoise,gene16800,RUS1 family protein C16orf58 homolog isoform X1
1441,gene16802,0.200188,0.168542,0.934131,64.367596,-1.104709,3.674851,3.872058,0.049096,0.732911,4,0.453556201,brown,gene16802,replication factor C subunit 5-like
1442,gene16803,0.124233,0.121327,-2.096892,44.556277,0.340786,7.098356,2.392654,0.121906,0.854029,10,0.765992886,green,gene16803,uncharacterized protein LOC111137676 isoform X1
1443,gene16808,0.000202,0.000452,3.294604,8.181713,-0.054969,6.377062,0.04265,0.836385,0.992241,9,0.263417133,blue,gene16808,inhibitor of growth protein 5-like
1444,gene16811,0.552203,0.40593,0.114005,0.473076,-1.310955,4.188234,4.520634,0.033488,0.671269,5,0.216592801,turquoise,gene16811,caspase-6-like
1445,gene1682,0.198333,0.205308,0.480769,0.729019,-1.721948,4.238003,3.242059,0.07177,0.785145,5,0.322925091,yellow,gene1682,uncharacterized protein LOC111136961
1446,gene16823,0.01277,0.020884,0.179892,0.36878,-0.671076,3.199233,1.01022,0.31485,0.93226,2,0.527284561,brown,gene16823,protein APCDD1-like
1447,gene16833,0.02182,0.033555,-3.074055,2.486158,0.159597,5.380086,0.235545,0.627443,0.980727,8,0.400700868,green,gene16833,uncharacterized protein DDB_G0284459-like
1448,gene16835,0,0,3.237491,83.438541,-0.523934,4.779595,1.824817,0.176741,0.892094,6,0.355530609,turquoise,gene16835,nucleoporin GLE1-like
1449,gene16838,0.000235,0.000501,3.055307,31.805348,0.001172,5.382321,8.00E-06,0.997744,0.999704,8,0.577711492,turquoise,gene16838,kinesin-like protein KIF12 isoform X10
1450,gene16839,0.192959,0.144281,-1.90483,56.402519,-0.345798,4.9692,0.562393,0.453298,0.956091,7,0.488613902,turquoise,gene16839,"LOW QUALITY PROTEIN: phosphatidylinositol 4-kinase alpha-like, partial"
1451,gene1684,0.070596,0.072687,6.571043,51.516918,-0.414402,6.570509,2.048973,0.152309,0.878894,9,0.707138312,blue,gene1684,calcium-binding mitochondrial carrier protein Aralar2-like isoform X1
1452,gene16840,0,0,-5.474586,58.794234,-0.271922,10.135417,0.850189,0.356499,0.93226,10,0.629379982,brown,gene16840,"cytochrome c oxidase subunit 6A2, mitochondrial-like"
1453,gene16845,0.00389,0.007157,8.3936,58.424133,0.4548,5.781032,1.971117,0.160329,0.884593,8,0.718184114,yellow,gene16845,arrestin domain-containing protein 3-like
1454,gene16866,0,0,3.67954,86.121567,0.070631,3.952647,0.012026,0.912678,0.993796,4,0.160842338,turquoise,gene16866,tyrosine aminotransferase-like
1455,gene16869,0.244529,0.16686,-3.813591,63.373439,0.190234,5.211759,0.333773,0.563446,0.974795,7,0.450429725,blue,gene16869,valacyclovir hydrolase-like isoform X1
1456,gene16883,0.275476,0.240574,-0.015157,0.717655,-1.064146,4.182135,2.009382,0.156329,0.882396,5,0.52959526,brown,gene16883,uncharacterized protein LOC111099230 isoform X1
1457,gene16895,0,0,19.927913,56.990768,-0.24228,3.88589,0.214683,0.643121,0.981108,4,0.138210415,turquoise,gene16895,borealin-like
1458,gene16896,0.175169,0.124619,1.123801,28.384039,0.070783,7.028628,0.029633,0.863325,0.993796,10,0.895489046,turquoise,gene16896,"1-phosphatidylinositol 4,5-bisphosphate phosphodiesterase gamma-1-like isoform X1"
1459,gene16897,0.007743,0.013363,-1.280662,4.09581,-0.236625,6.459252,0.666434,0.414298,0.946894,9,0.09097148,turquoise,gene16897,protein unc-93 homolog A-like
1460,gene16907,0.091284,0.096268,-17.112441,67.644965,-0.081443,7.362543,0.082155,0.774398,0.987969,10,0.166098876,brown,gene16907,ras-related protein Rab-2
1461,gene1691,6.80E-05,0.00016,5.563108,8.244626,1.032389,3.712996,5.267601,0.021726,0.593854,4,-0.006959874,turquoise,gene1691,polyadenylate-binding protein 4-like isoform X1
1462,gene16912,0.099211,0.101748,-0.976864,39.526995,-0.11842,4.901319,0.149131,0.699367,0.984987,7,0.414969617,yellow,gene16912,beta-1-syntrophin-like
1463,gene16915,0.41358,0.292447,2.590837,72.15819,-0.346028,7.414053,1.701696,0.192066,0.89842,10,0.299315492,blue,gene16915,plasmolipin-like
1464,gene16916,0.23797,0.173328,10.770565,11.405229,0.069028,5.259594,0.036389,0.848715,0.992473,8,0.369579118,green,gene16916,kelch-like protein 24
1465,gene16918,0.197204,0.150891,2.700773,50.910421,0.182322,6.572122,0.645678,0.421662,0.950565,9,0.466827127,yellow,gene16918,C-Maf-inducing protein-like
1466,gene16919,0.478318,0.291141,-3.628052,35.652101,-0.227904,8.796746,1.181668,0.277017,0.928733,10,0.665534527,yellow,gene16919,uncharacterized protein LOC111136303
1467,gene16921,2.00E-06,7.00E-06,-0.540988,0.779988,-0.273107,7.263638,0.831561,0.361822,0.933235,10,0.759941557,blue,gene16921,LOW QUALITY PROTEIN: uncharacterized protein C20orf85 homolog
1468,gene16924,0.45788,0.371795,-0.537576,1.172521,-0.271105,4.232758,0.290125,0.590141,0.978657,5,0.442850058,blue,gene16924,LOW QUALITY PROTEIN: beta-catenin-like protein 1
1469,gene16925,0.130739,0.149136,-0.72583,88.506382,-0.25509,6.46759,1.316942,0.251142,0.921675,9,0.61711207,green,gene16925,LOW QUALITY PROTEIN: zinc finger CCCH domain-containing protein 18-like
1470,gene16926,0.57028,0.427775,0.638063,8.587934,-0.274656,6.454999,1.213142,0.270711,0.928037,9,0.308211074,turquoise,gene16926,uncharacterized protein LOC111137602 isoform X1
1471,gene16927,0.434524,0.276299,-8.46083,68.915146,0.280721,5.583891,1.157632,0.281957,0.928733,8,0.521518051,green,gene16927,LOW QUALITY PROTEIN: protein ELYS-like
1472,gene1693,0.141576,0.158576,-0.599044,51.447634,-0.036235,10.201059,0.014721,0.903431,0.993796,10,0.533478405,blue,gene1693,polyadenylate-binding protein 4-like
1473,gene16935,0.164585,0.155737,0.833205,59.296648,-0.036298,6.614291,0.019397,0.889234,0.993796,9,0.145127542,turquoise,gene16935,LOW QUALITY PROTEIN: active breakpoint cluster region-related protein-like
1474,gene16936,0,0,-0.842923,7.707447,-0.447189,5.236047,1.536328,0.215165,0.909234,7,0.205598622,turquoise,gene16936,LOW QUALITY PROTEIN: uncharacterized protein LOC111133947
1475,gene16941,0.334086,0.21517,1.350377,52.330022,-0.085478,5.652166,0.044745,0.832473,0.992241,8,0.701508942,turquoise,gene16941,eIF-2-alpha kinase activator GCN1-like
1476,gene16944,5.00E-05,0.00012,3.496137,1.179033,-0.035208,5.827139,0.007629,0.930397,0.993796,9,0.575116538,blue,gene16944,triosephosphate isomerase-like
1477,gene16948,0.005073,0.008142,-4.876337,19.636632,0.779211,4.452364,4.112049,0.042579,0.702489,6,0.055238266,turquoise,gene16948,uncharacterized protein LOC111138388
1478,gene16950,0.322208,0.237878,0.512424,2.156076,-0.887425,4.289041,1.686662,0.194042,0.89842,5,0.793276527,turquoise,gene16950,C-type lectin-like
1479,gene16955,0,0,-8.0617,71.561697,-0.509545,4.538622,1.501814,0.220392,0.911329,6,0.27063293,blue,gene16955,ankycorbin-like isoform X2
1480,gene16956,0.004235,0.007732,2.477741,81.720655,0.393685,3.127837,0.592223,0.441561,0.953855,2,0.020689127,turquoise,gene16956,CTD nuclear envelope phosphatase 1-like
1481,gene16957,0.168701,0.181297,0.414559,0.718853,0.978794,3.404297,2.488966,0.114647,0.844312,3,0.300712597,green,gene16957,uncharacterized protein LOC111133900
1482,gene16958,0.127236,0.145976,-0.161045,3.634898,-0.479435,4.904552,1.979919,0.159399,0.884593,7,0.207003862,turquoise,gene16958,N-acetylglucosaminyl-phosphatidylinositol de-N-acetylase-like
1483,gene16960,0,0,-29.90849,32.359037,-0.173613,3.298721,0.082197,0.774343,0.987969,3,0.046159934,turquoise,gene16960,nucleolar complex protein 4 homolog A-like
1484,gene16961,0,0,8.833232,61.935087,0.048318,8.226892,0.058028,0.809641,0.991391,10,0.753124108,green,gene16961,helicase domino-like isoform X1
1485,gene16967,0.347737,0.25439,1.51745,3.497951,0.661986,4.04911,2.761876,0.096535,0.825168,5,0.372481664,red,gene16967,LOW QUALITY PROTEIN: F-box/WD repeat-containing protein pof1-like
1486,gene16969,0,0,7.624046,11.076141,0.39473,4.939917,1.491998,0.221907,0.911329,7,-0.025773957,turquoise,gene16969,LOW QUALITY PROTEIN: ATP-dependent RNA helicase DDX19A-like
1487,gene16970,0,0,-0.508914,80.889699,-0.719593,4.027184,0.506777,0.476538,0.95729,5,0.718126345,turquoise,gene16970,dnaJ homolog subfamily C member 16-like
1488,gene16974,0.328418,0.234074,9.309287,14.528674,0.086936,6.203446,0.04202,0.837581,0.992241,9,0.156029239,turquoise,gene16974,25S rRNA (cytosine-C(5))-methyltransferase nop2-like
1489,gene16975,0.490248,0.387152,-0.158465,6.339503,-1.212054,4.012625,1.82766,0.176404,0.892094,5,0.430315203,turquoise,gene16975,uncharacterized protein LOC111137658 isoform X1
1490,gene16980,0.174727,0.186215,-1.260526,5.300229,0.758019,4.436623,0.469005,0.493445,0.960128,6,0.048746131,turquoise,gene16980,uncharacterized protein LOC111135366 isoform X1
1491,gene16993,0.289991,0.27085,0.765571,79.556447,-0.206642,3.187212,0.097925,0.754334,0.987969,2,0.46618264,blue,gene16993,protein C8orf37 homolog
1492,gene1700,0.594864,0.440177,0.250166,0.810018,-0.740029,3.756267,1.214974,0.270349,0.927721,4,0.026795025,turquoise,gene1700,neuronal acetylcholine receptor subunit alpha-9-like
1493,gene1701,4.00E-05,9.70E-05,3.771993,21.553823,1.234982,5.066943,5.861116,0.015479,0.537678,7,0.555484303,red,gene1701,aldehyde dehydrogenase family 3 member B1-like isoform X1
1494,gene17012,0.126256,0.108971,0.668888,58.145303,-0.012096,5.977588,0.000947,0.975454,0.998341,9,0.068296099,turquoise,gene17012,piwi-like protein 1 isoform X1
1495,gene17013,0,0,-3.361805,11.946001,-0.541229,4.883031,1.436878,0.230645,0.916332,7,0.415968288,brown,gene17013,mitotic-spindle organizing protein 2-like
1496,gene17025,0.712398,0.492402,0.44919,30.940595,-0.116051,3.990354,0.034599,0.852438,0.993016,5,0.651349138,turquoise,gene17025,protein spire homolog 1-like isoform X1
1497,gene17026,0.296764,0.219838,2.404656,28.146099,-0.197981,3.189737,0.099722,0.752164,0.987969,2,0.435145804,pink,gene17026,protein VAC14 homolog isoform X1
1498,gene17046,0.019757,0.030779,2.57703,5.21337,-0.071086,3.780842,0.016007,0.899321,0.993796,4,0.284173017,blue,gene17046,oxysterol-binding protein 1-like isoform X1
1499,gene17052,0,0,7.897896,56.161077,0.207438,5.160666,0.218362,0.640291,0.981108,7,0.211279912,green,gene17052,LOW QUALITY PROTEIN: apoptosis-inducing factor 3-like
1500,gene17055,0.284403,0.267155,0.804864,9.316598,-0.481707,4.883834,0.622776,0.430018,0.951901,7,0.743932083,turquoise,gene17055,transmembrane protein 97-like
1501,gene1707,1.00E-06,3.00E-06,8.060219,67.349096,0.554007,5.374787,2.511685,0.113005,0.840276,8,0.263943546,black,gene1707,mediator of RNA polymerase II transcription subunit 25-like isoform X1
1502,gene17071,0.818897,0.534296,0.111818,3.423566,-0.784703,3.894803,0.875065,0.349557,0.93226,4,0.3739282,brown,gene17071,uncharacterized protein LOC111133392
1503,gene17073,0.380989,0.327993,-1.163198,92.031966,0.312929,3.254647,0.36501,0.545737,0.969301,3,0.434672726,red,gene17073,peroxisomal targeting signal 1 receptor-like isoform X1
1504,gene17099,3.00E-06,9.00E-06,15.910178,16.921635,0.255144,3.876068,0.290604,0.589834,0.978657,4,0.372083978,blue,gene17099,TBC1 domain family member 31-like
1505,gene171,0.143651,0.118811,-9.619975,68.359368,-0.097526,4.414674,0.027703,0.867809,0.993796,6,0.820285213,turquoise,gene171,myoneurin-like isoform X6
1506,gene1710,0,0,-6.408536,18.119961,0.383339,6.969306,1.282943,0.257352,0.923641,10,0.279102733,blue,gene1710,protein CDV3 homolog
1507,gene17101,0.003662,0.006774,7.794535,34.112165,-0.790467,3.924184,1.15134,0.283269,0.928733,4,0.103505397,turquoise,gene17101,derlin-1-like isoform X1
1508,gene17102,1.00E-06,3.00E-06,-6.455695,25.299649,0.20534,3.567991,0.154354,0.694409,0.984331,3,0.174412147,green,gene17102,uncharacterized protein LOC111133165
1509,gene17105,0.115805,0.107172,-0.24159,37.563938,-0.416523,3.399161,0.364493,0.546022,0.969301,3,0.532071005,greenyellow,gene17105,uncharacterized protein KIAA1841-like isoform X1
1510,gene1712,0,0,2.981114,61.736684,-0.271882,5.614045,0.412463,0.520722,0.965358,8,0.141923969,red,gene1712,MKI67 FHA domain-interacting nucleolar phosphoprotein-like
1511,gene17135,0,0,7.422885,22.154586,0.058147,4.426076,0.014322,0.90474,0.993796,6,0.225792825,red,gene17135,serine/threonine-protein phosphatase 4 catalytic subunit
1512,gene17149,0.449543,0.358428,0.116783,5.649894,0.008965,3.529359,0.000211,0.988404,0.999244,3,0.428682988,turquoise,gene17149,sphingomyelin phosphodiesterase 4-like
1513,gene1715,0.539364,0.369039,0.230784,0.90422,-0.122553,5.020818,0.024541,0.875516,0.993796,7,0.875628644,turquoise,gene1715,uncharacterize lncRNA
1514,gene17163,0,0,7.638577,17.710348,-0.800087,3.723414,1.258536,0.261928,0.925081,4,0.440182794,brown,gene17163,uncharacterized protein KIAA1841-like isoform X1
1515,gene1717,0.730024,0.492136,-0.063717,2.057318,0.977841,4.185757,2.299028,0.129455,0.860467,5,0.221418522,turquoise,gene1717,uncharacterized protein LOC111127271
1516,gene17175,2.00E-06,5.00E-06,-3.993464,50.873419,0.746268,3.354144,1.960115,0.161501,0.885665,3,0.28279479,green,gene17175,MAP kinase-activated protein kinase 5-like
1517,gene17179,0,0,4.033688,84.959443,-0.427955,5.818353,0.763672,0.382182,0.93925,8,0.678323059,turquoise,gene17179,telomerase-binding protein EST1A-like
1518,gene17190,0,0,11.899631,27.593319,0.45422,4.32833,1.852171,0.173531,0.891743,5,0.267185974,turquoise,gene17190,uncharacterized protein LOC111135887
1519,gene17194,0.457334,0.371492,1.592538,61.638849,-0.305506,5.584642,0.528175,0.467375,0.956091,8,0.2199553,blue,gene17194,LOW QUALITY PROTEIN: pre-rRNA processing protein FTSJ3-like
1520,gene172,0.006967,0.010781,-0.962939,60.323943,-0.461409,5.346652,2.210583,0.137067,0.863728,8,0.4859948,brown,gene172,hypermethylated in cancer 2 protein-like isoform X12
1521,gene17201,0.247978,0.168307,6.197749,40.054055,-0.363788,6.522897,2.215033,0.136672,0.863321,9,0.293368185,turquoise,gene17201,LOW QUALITY PROTEIN: metastasis suppressor protein 1-like
1522,gene17202,0,0,-8.787286,72.481528,0.502253,6.60179,1.814628,0.177954,0.893207,9,0.588108762,turquoise,gene17202,uncharacterized protein LOC111136886
1523,gene17210,0,0,-16.151548,73.317672,0.295748,3.743419,0.31419,0.57512,0.976289,4,0.18422186,red,gene17210,ubiquitin-conjugating enzyme E2 C-like
1524,gene17212,0,1.00E-06,-8.133377,34.608494,0.142691,3.842773,0.078927,0.778757,0.988002,4,0.467298732,turquoise,gene17212,uncharacterized protein LOC111135404 isoform X1
1525,gene17214,0.081321,0.090601,-1.182128,58.094864,0.262988,4.777896,0.644697,0.422015,0.950565,6,0.653940495,green,gene17214,LOW QUALITY PROTEIN: ATP-dependent RNA helicase A-like
1526,gene17215,0.053583,0.067231,7.4268,53.806459,0.066482,7.882895,0.06694,0.795845,0.990057,10,0.636205911,turquoise,gene17215,uncharacterized protein LOC111136911
1527,gene17219,0.000547,0.001103,-6.900155,11.087812,-0.675484,4.721864,2.493329,0.11433,0.843756,6,0.321433351,turquoise,gene17219,"nitric oxide synthase, brain-like isoform X1"
1528,gene17226,0,0,-10.060127,41.703108,-0.421994,5.419837,1.665067,0.196921,0.900441,8,0.408291614,turquoise,gene17226,lipoma-preferred partner homolog isoform X1
1529,gene17227,0.130403,0.115155,-5.118347,11.554279,-0.798305,3.512762,0.637513,0.424613,0.951191,3,0.764269186,turquoise,gene17227,probable cation-transporting ATPase 13A3 isoform X1
1530,gene17231,0.037966,0.049349,-0.768647,36.962695,-0.163584,5.253709,0.329272,0.566088,0.975073,8,0.178992742,turquoise,gene17231,uncharacterized protein LOC111132034
1531,gene17233,0.385309,0.330345,-0.542015,2.014187,-0.490798,4.331218,1.446569,0.229079,0.915304,5,0.235625216,turquoise,gene17233,glycoprotein 3-alpha-L-fucosyltransferase A-like
1532,gene17236,0.004575,0.007427,0.969812,26.815641,0.267978,4.902911,0.376442,0.539514,0.96884,7,0.27954095,blue,gene17236,cation-dependent mannose-6-phosphate receptor-like
1533,gene17239,0.233363,0.162377,-5.77711,38.078131,-0.170245,5.126429,0.196333,0.657697,0.981306,7,0.571789238,turquoise,gene17239,activated CDC42 kinase 1-like isoform X1
1534,gene17241,0.22526,0.206606,1.550001,32.772415,-0.197317,6.263814,0.555151,0.456221,0.956091,9,0.162909862,turquoise,gene17241,Golgi integral membrane protein 4-like isoform X2
1535,gene17242,0,0,10.893331,46.370994,-0.683131,3.364179,1.149511,0.283652,0.928733,3,0.498191448,turquoise,gene17242,LOW QUALITY PROTEIN: multiple epidermal growth factor-like domains protein 6
1536,gene17244,0.020686,0.032055,-0.569416,3.799987,-0.33707,6.223931,1.740267,0.187105,0.896825,9,0.429947245,green,gene17244,tyrosine-protein kinase PR2-like isoform X1
1537,gene17245,0,0,4.835733,36.12879,0.068942,5.977522,0.063443,0.801135,0.990566,9,0.573531088,blue,gene17245,tumor protein p63-regulated gene 1-like protein
1538,gene1725,0.000713,0.001477,1.582363,1.044408,-0.988924,4.471087,3.411687,0.064736,0.772093,6,0.347046409,brown,gene1725,zinc transporter 2-like isoform X1
1539,gene17252,0.150628,0.133952,1.678859,17.652027,-0.185644,3.113856,0.133973,0.714348,0.98622,2,0.242704978,red,gene17252,E3 ubiquitin-protein ligase CHFR-like isoform X1
1540,gene17256,0.286171,0.268365,-0.046045,0.339802,0.046781,5.558405,0.01418,0.905212,0.993796,8,0.817247902,turquoise,gene17256,collagen alpha-1(XII) chain-like isoform X5
1541,gene17257,0.067028,0.062601,1.437017,47.927125,-0.054603,4.845909,0.018893,0.890673,0.993796,7,0.037545296,turquoise,gene17257,uncharacterized protein LOC111134622
1542,gene17259,0.19617,0.167179,7.173816,21.599995,0.095401,3.582853,0.019785,0.88814,0.993796,3,0.233572294,red,gene17259,required for meiotic nuclear division protein 1 homolog
1543,gene17261,0.118958,0.138443,-2.76123,16.738783,0.205925,6.553821,0.482105,0.48747,0.959339,9,0.114580339,turquoise,gene17261,proline-serine-threonine phosphatase-interacting protein 2-like isoform X1
1544,gene17266,0.002166,0.003945,-3.383818,48.579578,-0.115643,7.019827,0.254919,0.613632,0.978657,10,0.622503408,green,gene17266,calcium-transporting ATPase sarcoplasmic/endoplasmic reticulum type-like isoform X1
1545,gene17268,0,0,7.451062,25.833033,-0.002822,6.180102,4.00E-05,0.994939,0.999244,9,0.641103859,turquoise,gene17268,LOW QUALITY PROTEIN: mediator of RNA polymerase II transcription subunit 15-like
1546,gene17271,0.076393,0.096975,-0.089554,1.307534,-0.025597,7.898664,0.016711,0.897143,0.993796,10,0.61712397,green,gene17271,clathrin heavy chain 1 isoform X1
1547,gene17280,0.17647,0.187706,1.27851,74.374615,-0.091207,6.488783,0.056442,0.812211,0.991904,9,0.651931132,turquoise,gene17280,UPF0183 protein C16orf70 homolog
1548,gene17283,0.240736,0.195114,0.456629,15.843498,-0.300806,6.078117,0.946236,0.330679,0.93226,9,0.304130439,purple,gene17283,ras-responsive element-binding protein 1-like isoform X1
1549,gene17289,0.001989,0.003854,4.270177,37.298555,0.53972,9.15963,0.957913,0.327713,0.93226,10,0.85376043,black,gene17289,LOW QUALITY PROTEIN: rhophilin-2-like
1550,gene17291,0.01936,0.030225,-6.709957,52.590937,0.068356,4.031949,0.030492,0.861379,0.993745,5,0.065663417,turquoise,gene17291,LOW QUALITY PROTEIN: calcium-transporting ATPase type 2C member 1-like
1551,gene17293,0.004781,0.008641,-3.617098,27.150319,-0.541638,5.317313,0.635052,0.425508,0.951191,8,0.900472955,turquoise,gene17293,LOW QUALITY PROTEIN: protein disulfide-isomerase TMX3-like
1552,gene17295,0,0,16.369767,31.628874,0.387637,6.832676,1.676715,0.195362,0.89842,10,0.192336797,turquoise,gene17295,LOW QUALITY PROTEIN: F-actin-uncapping protein LRRC16A-like
1553,gene17297,0.315383,0.244687,4.601616,17.303837,-0.003704,5.158278,0.000132,0.990851,0.999244,7,0.325845422,green,gene17297,LOW QUALITY PROTEIN: ubiquitin carboxyl-terminal hydrolase 10-like
1554,gene17301,0.962846,0.584269,0.011639,2.436711,0.308102,10.77506,1.565124,0.210916,0.906563,10,0.608830724,black,gene17301,LOW QUALITY PROTEIN: uncharacterized protein LOC111137108
1555,gene17313,0.474658,0.289858,-4.453783,13.192082,-0.390652,4.286738,0.776472,0.378222,0.939089,5,0.157205054,turquoise,gene17313,uncharacterized protein LOC111136454
1556,gene17314,0.048601,0.058926,0.546805,1.376226,0.112948,5.210158,0.18144,0.670138,0.983547,7,0.344489927,pink,gene17314,Golgi SNAP receptor complex member 1-like
1557,gene17315,0.208458,0.213262,-0.50685,82.294605,0.084553,5.429402,0.05509,0.814432,0.992237,8,0.728821699,yellow,gene17315,LOW QUALITY PROTEIN: ankyrin repeat domain-containing protein 13D-like
1558,gene17316,0,0,-12.573294,73.662031,0.264327,4.468431,0.567119,0.451406,0.956091,6,0.380399688,green,gene17316,ARF GTPase-activating protein GIT2-like isoform X1
1559,gene17318,0.000125,0.00028,-1.030643,16.427771,0.448268,4.499439,1.317525,0.251037,0.921675,6,0.092929879,turquoise,gene17318,solute carrier family 15 member 4-like
1560,gene17354,0.387469,0.331659,-0.51637,3.041393,-0.416597,3.267015,0.571342,0.449726,0.956091,3,0.217643786,turquoise,gene17354,3 beta-hydroxysteroid dehydrogenase/Delta 5-->4-isomerase type 3-like isoform X1
1561,gene1736,0.208148,0.143765,2.49973,25.786408,-0.368943,7.124871,1.192782,0.274769,0.928733,10,0.904267835,turquoise,gene1736,transcription factor Sox-5-like isoform X1
1562,gene17367,2.10E-05,5.00E-05,-7.165415,70.09305,-0.912367,3.409157,2.250957,0.133532,0.863321,3,0.373023137,blue,gene17367,vigilin-like
1563,gene17382,0.005095,0.009161,-2.115857,82.466214,0.837602,4.051089,2.148605,0.142699,0.867388,5,0.213502094,blue,gene17382,rab GTPase-binding effector protein 1-like isoform X1
1564,gene17383,0.009235,0.014493,-4.117959,49.057052,0.201761,4.277152,0.100271,0.751504,0.987969,5,0.525486756,yellow,gene17383,SH2B adapter protein 1-like
1565,gene17394,0,0,-22.434042,34.716731,-0.251819,4.187074,0.233176,0.629179,0.980774,5,0.113578217,turquoise,gene17394,uncharacterized protein LOC111132496
1566,gene1740,0.057941,0.063124,1.834201,19.054062,-0.302753,6.092882,0.3974,0.528435,0.967269,9,0.702832512,turquoise,gene1740,inactive phospholipase C-like protein 2
1567,gene17400,0,0,-1.021188,3.237902,0.239876,4.050474,0.281488,0.595728,0.978657,5,0.261116688,black,gene17400,sodium-dependent dopamine transporter-like
1568,gene1741,0,0,-8.769843,24.717217,-0.405359,3.65399,0.408193,0.522888,0.96647,4,0.668032103,red,gene1741,ubiquitin carboxyl-terminal hydrolase 44-like
1569,gene1744,0.297434,0.27573,0.182378,0.30739,0.182349,4.938026,0.142078,0.706224,0.985478,7,0.649398476,turquoise,gene1744,deoxyribonuclease-1-like isoform X1
1570,gene17454,8.40E-05,0.000196,3.758398,3.330639,-0.356773,4.680851,0.510069,0.475109,0.95729,6,0.238378128,turquoise,gene17454,nucleoredoxin-like
1571,gene1746,0.705806,0.489639,-0.446122,9.533434,1.145496,4.104611,3.380231,0.065983,0.772401,5,0.706104449,turquoise,gene1746,deoxyribonuclease-1-like
1572,gene17477,0.248572,0.210206,0.10533,0.640734,0.280379,5.012154,0.180791,0.670694,0.983547,7,0.759459118,turquoise,gene17477,metabotropic glutamate receptor 6-like isoform X2
1573,gene17487,0.355928,0.270092,-0.542366,2.022194,-0.047819,6.384132,0.011501,0.914598,0.993796,9,0.793934606,turquoise,gene17487,uncharacterized protein LOC111133093 isoform X1
1574,gene1750,0.017896,0.028163,-0.48851,1.207337,-0.495046,5.798657,2.300297,0.129349,0.860467,8,0.441897361,brown,gene1750,proteasomal ubiquitin receptor ADRM1-B-like
1575,gene17518,0.404104,0.340934,0.210805,0.59102,-1.345503,4.045841,6.164464,0.013034,0.521338,5,0.147964943,turquoise,gene17518,"fatty acid-binding protein, heart-like"
1576,gene17519,0.002947,0.005541,-3.908479,9.742416,0.926929,4.151188,3.078348,0.079341,0.799972,5,-0.008545098,turquoise,gene17519,uncharacterized protein LOC111133506 isoform X1
1577,gene17524,0.40551,0.341761,0.337348,0.776204,-1.279969,3.659845,2.955806,0.08557,0.811887,4,0.405828119,turquoise,gene17524,uncharacterized protein LOC111135010 isoform X1
1578,gene17531,0,0,8.772566,79.028783,-0.030173,4.106751,0.003741,0.951228,0.997184,5,0.125535696,turquoise,gene17531,trafficking protein particle complex subunit 11-like
1579,gene1754,0.772664,0.515823,-0.009329,12.629615,-0.108569,4.428938,0.121689,0.72721,0.98622,6,0.167666616,turquoise,gene1754,synaptojanin-1-like isoform X1
1580,gene17551,0.887488,0.559001,-0.004532,0.269269,-0.076352,6.675927,0.045505,0.831078,0.992241,9,0.762808579,blue,gene17551,uncharacterized protein LOC111133666 isoform X1
1581,gene17554,0.328416,0.279614,1.223716,9.939871,-0.276072,5.46325,0.880985,0.347932,0.93226,8,0.519505041,green,gene17554,LIM domain-containing protein jub-like isoform X2
1582,gene17555,0.155087,0.130939,2.439121,56.882184,-0.049553,5.137657,0.011005,0.91645,0.993796,7,0.634137965,red,gene17555,MORN repeat-containing protein 1-like isoform X1
1583,gene17556,0,0,-13.265684,75.241724,0.427255,5.532816,1.194012,0.274522,0.928733,8,0.21352803,blue,gene17556,N-terminal EF-hand calcium-binding protein 1-like
1584,gene17557,0,0,5.063601,13.039736,-0.612651,5.69499,1.102971,0.293615,0.930856,8,0.667804827,blue,gene17557,uncharacterized protein LOC111137733
1585,gene1756,0.029474,0.043481,-0.268671,0.428161,-0.298908,4.172338,0.396066,0.529128,0.967269,5,0.352568668,green,gene1756,Golgi SNAP receptor complex member 2-like
1586,gene17560,0.304476,0.213029,2.502983,41.110827,0.281298,7.1543,0.397243,0.528517,0.967269,10,0.732320405,black,gene17560,LOW QUALITY PROTEIN: leucine-rich repeat and coiled-coil domain-containing protein 1-like
1587,gene17571,0,0,-9.861727,56.413931,0.157795,6.747707,0.498019,0.480372,0.959052,10,0.356145903,green,gene17571,LOW QUALITY PROTEIN: autism susceptibility gene 2 protein-like
1588,gene17576,0.300705,0.227085,0.631178,48.787008,0.171466,6.811684,0.203267,0.652097,0.981108,10,0.494734215,black,gene17576,LOW QUALITY PROTEIN: CD109 antigen-like
1589,gene17589,0.424864,0.272683,-6.770191,12.639232,0.044174,4.258916,0.013952,0.905975,0.993796,5,0.357030627,turquoise,gene17589,"acyl-coenzyme A thioesterase 9, mitochondrial-like isoform X1"
1590,gene17590,9.00E-06,2.30E-05,5.952869,77.794279,0.281116,6.552057,0.815253,0.366572,0.936651,9,0.382346197,brown,gene17590,probable ubiquitin-conjugating enzyme E2 7
1591,gene17596,0.075005,0.082912,-1.219444,13.975497,-0.182219,4.155416,0.10451,0.746483,0.987969,5,0.392471059,turquoise,gene17596,"allantoinase, mitochondrial-like isoform X1"
1592,gene17601,8.60E-05,0.000181,0.944797,45.108118,-0.002889,6.037988,9.30E-05,0.992292,0.999244,9,0.592900088,yellow,gene17601,LOW QUALITY PROTEIN: anoctamin-7-like
1593,gene17612,0.116293,0.115621,9.229721,25.228252,0.033368,3.375583,0.004343,0.947458,0.996644,3,0.057089357,turquoise,gene17612,LOW QUALITY PROTEIN: voltage-gated potassium channel subunit beta-2-like
1594,gene17614,0.007919,0.013637,4.354804,77.432374,-0.052294,7.624603,0.035089,0.851408,0.993016,10,0.182784232,turquoise,gene17614,LOW QUALITY PROTEIN: eukaryotic translation initiation factor 4 gamma 1-like
1595,gene17616,0.111289,0.11978,-1.424899,57.313446,0.255605,3.367576,0.241545,0.623093,0.979812,3,0.116851849,turquoise,gene17616,F-box protein At1g78280-like isoform X1
1596,gene17626,0,0,-20.591552,71.655255,0.052384,4.86326,0.017481,0.894814,0.993796,7,0.55950206,yellow,gene17626,phenylalanine--tRNA ligase beta subunit-like
1597,gene17629,2.00E-06,5.00E-06,3.375841,75.166179,-0.257472,4.328295,0.312205,0.57633,0.976289,5,0.280135711,blue,gene17629,REM2- and Rab-like small GTPase 1
1598,gene17631,0,0,8.70974,45.58973,-0.451961,3.703723,1.054546,0.304462,0.93226,4,0.224885784,black,gene17631,"LOW QUALITY PROTEIN: DNA-directed RNA polymerase, mitochondrial-like"
1599,gene17633,0.106668,0.092021,-0.516022,61.672146,0.38424,4.87345,1.050503,0.305391,0.93226,7,0.12495078,turquoise,gene17633,LOW QUALITY PROTEIN: kinesin-like protein KIF20B
1600,gene17634,0.29248,0.185181,12.751333,60.220567,-0.014125,4.960292,0.001785,0.966303,0.998298,7,0.50383697,green,gene17634,kinesin-like protein unc-104 isoform X1
1601,gene17635,0.049215,0.05464,8.226669,22.43931,0.102636,6.367072,0.085266,0.770284,0.987969,9,0.596863714,blue,gene17635,leucine-rich repeat-containing protein 34-like isoform X1
1602,gene17636,0,0,-9.308615,36.863619,-1.154126,3.644452,3.220509,0.072721,0.786946,4,0.485725863,yellow,gene17636,phosphopantothenoylcysteine decarboxylase-like
1603,gene17637,0.101581,0.109222,-3.11575,24.869589,-0.240421,4.645346,0.461543,0.496904,0.960259,6,0.434737477,turquoise,gene17637,metaxin-2-like
1604,gene17642,0.003607,0.005918,-2.376043,51.06944,-0.614814,4.408378,2.833075,0.092341,0.82316,6,0.374698362,grey,gene17642,LOW QUALITY PROTEIN: phosphorylated CTD-interacting factor 1-like
1605,gene17644,0.043953,0.054339,-1.870923,11.636632,0.229115,3.960581,0.18375,0.668171,0.983547,4,0.217427501,blue,gene17644,triple QxxK/R motif-containing protein-like
1606,gene1765,0,0,12.246983,68.142881,-0.020183,5.700859,0.001298,0.971262,0.998341,8,0.384469535,turquoise,gene1765,nck-associated protein 1-like isoform X1
1607,gene1766,0.259762,0.201922,3.927731,7.986638,0.749182,5.221466,1.038899,0.308078,0.93226,7,0.156681085,red,gene1766,nck-associated protein 1-like isoform X1
1608,gene17664,0.052938,0.071738,0.316858,1.574417,-0.232862,4.438399,0.162571,0.6868,0.98412,6,0.02883264,turquoise,gene17664,GTP-binding protein REM 1-like
1609,gene17666,0,0,-10.719976,36.857795,-0.016153,7.774432,0.001176,0.972643,0.998341,10,0.570942841,black,gene17666,LOW QUALITY PROTEIN: WD repeat-containing protein 97-like
1610,gene17673,0.060173,0.079791,1.558417,57.449638,0.030442,4.455149,0.005766,0.93947,0.995158,6,0.272370539,black,gene17673,ATPase WRNIP1-like
1611,gene17674,0.188054,0.185539,-0.373852,0.87335,0.608197,4.413994,1.581158,0.208594,0.90532,6,0.396967998,black,gene17674,uncharacterized protein LOC111133910
1612,gene17678,0.119575,0.138712,2.462895,17.240431,0.231774,4.997262,0.605142,0.436623,0.953855,7,0.225977216,turquoise,gene17678,cleavage and polyadenylation specificity factor subunit 5-like isoform X1
1613,gene17679,0.007811,0.012499,6.090749,58.120611,-0.128211,4.215673,0.091796,0.761906,0.987969,5,0.569961217,blue,gene17679,N6-adenosine-methyltransferase subunit METTL3-like
1614,gene1768,0.148889,0.14078,1.639274,15.987283,0.306351,4.892437,0.303992,0.581391,0.977018,7,0.801667691,red,gene1768,uncharacterized protein LOC111114715 isoform X1
1615,gene17680,0.189304,0.150077,0.360351,28.717688,0.50516,3.291538,0.527473,0.467671,0.956091,3,0.560146281,turquoise,gene17680,LOW QUALITY PROTEIN: uncharacterized protein LOC111134056
1616,gene17681,0.186606,0.195812,1.313393,3.092822,0.47783,5.264585,2.728437,0.098576,0.825168,8,0.677267189,turquoise,gene17681,LOW QUALITY PROTEIN: uncharacterized protein LOC111134058
1617,gene17682,0.008024,0.013799,-3.641241,53.011224,-0.35947,7.79181,1.149498,0.283654,0.928733,10,0.821143259,brown,gene17682,uncharacterized protein LOC111134057
1618,gene17687,0.000219,0.000468,-5.747636,35.819592,0.495038,4.544837,1.718645,0.189868,0.89842,6,0.253907582,turquoise,gene17687,putative neural-cadherin 2
1619,gene17688,0.541198,0.414935,0.528543,5.42084,-0.223389,6.956107,0.580021,0.446304,0.956037,10,0.545287121,yellow,gene17688,"serine/threonine-protein kinase PINK1, mitochondrial-like"
1620,gene1769,0.822303,0.535412,-0.054946,0.344605,-0.595114,4.127096,0.657221,0.417543,0.949371,5,0.25823353,magenta,gene1769,sulfotransferase 1A1-like isoform X2
1621,gene17691,0.128023,0.100085,2.286366,51.251456,0.119623,5.105472,0.161966,0.687353,0.98412,7,0.350157075,magenta,gene17691,solute carrier family 35 member C2-like
1622,gene17695,0.63293,0.44156,-0.112818,5.93532,0.14603,4.086632,0.082029,0.774566,0.987969,5,0.461812924,green,gene17695,protein smg8-like isoform X1
1623,gene17700,0.200331,0.169601,-0.444441,1.600779,-0.574491,5.884375,1.616829,0.203535,0.904123,9,0.406940492,turquoise,gene17700,uncharacterized protein LOC111137932
1624,gene17703,0,0,14.123222,11.692026,0.866196,3.249356,1.712532,0.190657,0.89842,3,0.394687532,yellow,gene17703,BTB/POZ domain-containing protein 3
1625,gene17707,0.081798,0.100738,-1.094112,34.045829,0.123456,6.628144,0.149207,0.699295,0.984987,9,0.788091825,blue,gene17707,LOW QUALITY PROTEIN: EF-hand calcium-binding domain-containing protein 5-like
1626,gene17713,0.001316,0.002418,-0.897969,54.84517,-0.11254,7.009063,0.125743,0.722887,0.98622,10,0.601425299,brown,gene17713,NADH-ubiquinone oxidoreductase subunit 8-like
1627,gene17715,0.248303,0.17968,0.700989,25.958507,-0.953536,4.410926,4.228638,0.039747,0.699822,6,0.570292681,greenyellow,gene17715,uncharacterized protein LOC111138176
1628,gene17716,0.264546,0.176093,-1.443918,31.211114,-0.107553,3.944152,0.038612,0.84422,0.992241,4,0.321013484,red,gene17716,LOW QUALITY PROTEIN: sodium- and chloride-dependent GABA transporter ine-like
1629,gene17717,0.087004,0.107729,2.606431,75.505965,-0.329151,4.800766,0.354489,0.551583,0.971818,7,0.553612777,magenta,gene17717,intraflagellar transport protein 22 homolog
1630,gene17719,2.00E-04,0.000418,-2.182907,74.174816,-0.010058,5.626928,0.001203,0.972337,0.998341,8,0.30879243,turquoise,gene17719,LOW QUALITY PROTEIN: probable E3 ubiquitin-protein ligase HECTD4
1631,gene17721,0.126789,0.123101,-2.063381,46.875969,-0.279392,4.48771,0.324203,0.569093,0.975293,6,0.627401566,turquoise,gene17721,LOW QUALITY PROTEIN: protein HIRA-like
1632,gene17728,0.338898,0.247027,2.532517,31.322174,0.176268,7.769751,0.325604,0.568259,0.975293,10,0.750127837,black,gene17728,LOW QUALITY PROTEIN: peripheral-type benzodiazepine receptor-associated protein 1-like
1633,gene17730,0.206959,0.212058,0.832315,2.102725,0.270971,4.175673,0.313182,0.575734,0.976289,5,0.248692151,turquoise,gene17730,synergin gamma-like isoform X1
1634,gene17733,0.050784,0.056374,1.220675,1.600358,0.593369,9.268279,1.312272,0.251984,0.921675,10,0.920455902,black,gene17733,LOW QUALITY PROTEIN: flocculation protein FLO11-like
1635,gene17737,0.101559,0.105125,-2.16462,37.122449,0.399077,7.046479,1.684987,0.194263,0.89842,10,0.548738505,black,gene17737,phospholipid scramblase 2-like isoform X1
1636,gene17740,0.403175,0.298629,0.140398,1.560836,0.208845,4.905003,0.329261,0.566095,0.975073,7,0.494661052,yellow,gene17740,neuroglobin-1-like
1637,gene17741,0.235804,0.189563,1.236671,4.392341,-1.046221,4.645529,5.028204,0.024938,0.61599,6,0.438642992,yellow,gene17741,calmodulin-beta-like isoform X1
1638,gene17747,0.079255,0.099916,0.117373,1.815479,-0.489268,5.557716,2.680954,0.101555,0.830735,8,0.568118691,purple,gene17747,LOW QUALITY PROTEIN: epithelial splicing regulatory protein 1-like
1639,gene17753,0,0,13.575501,78.070786,-1.443457,3.654748,3.536088,0.060047,0.765192,4,0.653518406,turquoise,gene17753,zinc finger protein 341-like
1640,gene17756,0.467756,0.292561,-0.186305,1.457837,-0.695677,4.377076,2.1559,0.142023,0.865821,6,0.033608467,turquoise,gene17756,uncharacterized protein LOC111134386
1641,gene17781,0.133717,0.151725,-0.229788,0.683873,0.248967,3.956796,0.334262,0.56316,0.974781,4,0.50065503,red,gene17781,uncharacterized protein LOC111134374
1642,gene17784,1.00E-06,3.00E-06,7.991962,43.15315,-0.193643,7.046199,0.701977,0.40212,0.944652,10,0.42461529,turquoise,gene17784,polyadenylate-binding protein 2-B-like
1643,gene17786,0.008377,0.012634,-2.461221,45.892747,-0.075295,4.673685,0.018849,0.890799,0.993796,6,0.114431903,turquoise,gene17786,RNA polymerase II subunit A C-terminal domain phosphatase SSU72-like
1644,gene17787,0.001651,0.00308,5.214646,30.276859,-0.28684,5.080905,0.48892,0.484409,0.959087,7,0.818113316,purple,gene17787,uncharacterized protein LOC111136777
1645,gene17788,0.072836,0.066457,-2.804019,55.2991,0.505347,10.116304,0.722204,0.395422,0.943335,10,0.952257393,black,gene17788,atrial natriuretic peptide receptor 1-like isoform X3
1646,gene17789,0.142798,0.134011,-5.149946,67.809136,-0.080892,6.436525,0.042683,0.836324,0.992241,9,0.727957009,blue,gene17789,zinc finger MYND domain-containing protein 12-like
1647,gene17790,0,0,0.967562,2.165128,-0.503678,3.562138,0.878898,0.348504,0.93226,3,0.481298021,brown,gene17790,mitochondrial import inner membrane translocase subunit Tim10-B-like
1648,gene17791,0,0,-9.157568,4.953451,1.133172,6.354139,4.919462,0.026556,0.62922,9,0.670337846,pink,gene17791,low choriolytic enzyme-like
1649,gene17799,0.033391,0.048472,0.491519,0.987857,-0.871774,3.897681,2.046941,0.152512,0.878894,4,0.047917246,turquoise,gene17799,tetratricopeptide repeat protein 36-like
1650,gene17800,0,0,-6.680278,82.157832,-0.124088,4.560587,0.140419,0.707865,0.985478,6,0.063338991,turquoise,gene17800,SUZ domain-containing protein 1-like
1651,gene17805,0.121347,0.126608,-2.527092,5.48647,1.00559,4.462298,4.157208,0.041458,0.699822,6,0.403079276,red,gene17805,sodium- and chloride-dependent glycine transporter 2-like
1652,gene17812,0,0,5.928187,19.34477,0.20792,7.253168,0.454518,0.500197,0.960259,10,0.852607186,purple,gene17812,"dynein heavy chain 10, axonemal-like isoform X1"
1653,gene17814,0.170521,0.109291,-5.69228,46.306666,0.267255,5.830361,1.278942,0.258096,0.924327,9,0.53995289,green,gene17814,huntingtin-interacting protein 1-like isoform X1
1654,gene17818,0.484334,0.319892,1.548581,87.885068,0.012401,6.550129,0.002109,0.963369,0.997962,9,-0.027672199,turquoise,gene17818,serine/arginine-rich splicing factor 1A-like
1655,gene17822,0,0,4.721507,32.534199,0.473698,3.604414,1.037576,0.308386,0.93226,4,0.196423225,turquoise,gene17822,HEAT repeat-containing protein 6-like
1656,gene17823,0.118127,0.104028,-3.085145,53.593486,-0.454012,4.734109,1.710937,0.190864,0.89842,6,0.513952437,turquoise,gene17823,zinc finger Y-chromosomal protein 2-like
1657,gene17825,0.240084,0.185731,-3.862071,26.607397,-0.456003,5.809415,1.795269,0.180285,0.893782,8,0.75725654,blue,gene17825,G-protein-signaling modulator 2-like isoform X2
1658,gene17828,0.514826,0.40134,-0.808953,8.612678,0.228511,3.335311,0.19885,0.655651,0.981306,3,0.389445688,blue,gene17828,TPR repeat-containing protein DDB_G0287407-like
1659,gene1783,0.865203,0.551291,-0.079417,0.801869,0.05381,6.263691,0.010417,0.918705,0.993796,9,0.178126417,green,gene1783,uncharacterized protein LOC111102200
1660,gene17830,0.196822,0.203326,-0.398315,0.697887,-0.277156,5.419915,0.365582,0.545422,0.969301,8,0.32943703,greenyellow,gene17830,solute carrier family 13 member 5-like
1661,gene17838,0,0,-5.92077,84.283545,-0.15936,5.867118,0.188168,0.664446,0.982916,9,0.761569319,turquoise,gene17838,LOW QUALITY PROTEIN: neurofibromin-like
1662,gene17840,0,0,11.882259,31.269577,-0.741155,5.878687,2.537618,0.111162,0.840276,9,0.744192156,turquoise,gene17840,LOW QUALITY PROTEIN: myb-binding protein 1A-like protein
1663,gene17841,0.24685,0.241578,0.706328,70.195543,-0.112655,5.081035,0.084044,0.77189,0.987969,7,0.422775261,brown,gene17841,LOW QUALITY PROTEIN: eukaryotic translation initiation factor 4H-like
1664,gene17843,0.626853,0.450508,-0.574693,30.232388,-0.11853,4.200011,0.069377,0.792246,0.989528,5,0.507328033,blue,gene17843,uncharacterized protein LOC111132219
1665,gene1785,0.54492,0.39633,-0.226847,8.663409,-0.774248,4.772382,1.900692,0.168001,0.888303,6,0.534299837,turquoise,gene1785,uncharacterized protein LOC111124596
1666,gene17853,0.149634,0.138653,2.75139,5.09965,0.06051,4.765098,0.036523,0.848439,0.992349,6,0.270689641,blue,gene17853,LOW QUALITY PROTEIN: protein phosphatase 1E-like
1667,gene17856,0.450059,0.325541,-0.215283,27.613405,0.347823,5.112419,0.610518,0.434593,0.953819,7,0.501409999,black,gene17856,LOW QUALITY PROTEIN: ATP-dependent DNA helicase Q4-like
1668,gene17858,0.000115,0.000251,-3.626527,22.240019,-0.0491,7.737698,0.036118,0.849272,0.992658,10,0.637808947,yellow,gene17858,LOW QUALITY PROTEIN: septin-7-like
1669,gene17862,0.290588,0.261425,-0.059656,0.749068,0.380771,4.14244,0.566971,0.451465,0.956091,5,0.371238241,green,gene17862,uncharacterized protein LOC111133066
1670,gene17868,0,0,-5.22673,34.665113,0.084229,4.914395,0.054775,0.814953,0.992241,7,0.289534248,black,gene17868,LOW QUALITY PROTEIN: low-density lipoprotein receptor-related protein 12-like
1671,gene17878,0.594554,0.436376,0.122813,4.941675,0.447839,9.8217,0.957937,0.327707,0.93226,10,0.907798473,black,gene17878,zinc finger protein ZFAT-like
1672,gene17879,0.991628,0.593868,0.012072,4.971808,-0.634472,4.587598,1.817163,0.177651,0.893207,6,0.330913434,blue,gene17879,neurochondrin-like
1673,gene17880,0.66904,0.473205,-0.40941,7.295228,-0.018442,5.817052,0.003497,0.952844,0.997184,8,0.577711858,brown,gene17880,protein NipSnap-like isoform X1
1674,gene17881,0,1.00E-06,13.406364,48.096118,-0.166314,7.067415,0.31256,0.576113,0.976289,10,0.777759762,blue,gene17881,coiled-coil domain-containing protein 42 homolog isoform X1
1675,gene17883,0.333273,0.299083,-0.275222,0.65926,-0.358759,4.138887,0.264245,0.607219,0.978657,5,0.767001883,red,gene17883,uncharacterized protein LOC111136077
1676,gene17885,0.000976,0.001982,-0.369744,1.808901,0.501128,4.09995,0.536152,0.464032,0.956091,5,0.348559851,blue,gene17885,carbonyl reductase
1677,gene17897,0.103011,0.080057,0.349477,14.085255,-0.459332,5.831605,1.441793,0.229849,0.915304,9,0.464106636,blue,gene17897,low-density lipoprotein receptor class A domain-containing protein 2-like isoform X2
1678,gene17898,0.434687,0.275786,4.412745,48.123558,-0.693769,5.25591,5.912707,0.015032,0.537678,8,0.467113406,turquoise,gene17898,kinesin-like protein KIFC3 isoform X1
1679,gene17899,0,0,-17.351826,69.90057,-0.096303,8.078941,0.184952,0.667151,0.983547,10,0.868147339,blue,gene17899,LOW QUALITY PROTEIN: casein kinase I-like
1680,gene17902,0.27747,0.228211,-0.55104,1.535697,0.832022,4.375579,0.800629,0.370905,0.937803,6,0.873252024,turquoise,gene17902,uncharacterized protein LOC111133663
1681,gene17903,0.164715,0.177924,-1.01069,0.848478,-0.540737,4.153452,1.398478,0.236979,0.916485,5,0.29931136,turquoise,gene17903,aurora kinase A-like
1682,gene17904,0,0,-13.625292,53.613506,0.053009,3.672981,0.011867,0.913254,0.993796,4,0.647815578,yellow,gene17904,probable E3 ubiquitin-protein ligase MID2
1683,gene17906,0.001379,0.002664,-5.567742,24.765171,-0.22158,5.029538,0.413633,0.520131,0.965262,7,0.518038848,yellow,gene17906,paraplegin-like
1684,gene17907,0,0,-3.377337,29.415173,0.225534,4.686498,0.055458,0.813825,0.991991,6,0.296484853,brown,gene17907,synapse differentiation-inducing gene protein 1-like isoform X1
1685,gene17908,0.00029,0.000616,-0.635606,50.191022,-0.091268,6.682252,0.168312,0.681616,0.983916,9,0.310210587,turquoise,gene17908,nuclear receptor coactivator 5-like isoform X2
1686,gene17910,0.708372,0.490701,-0.146288,0.470371,-0.568515,7.297869,2.169631,0.14076,0.86464,10,0.375640573,yellow,gene17910,uncharacterized protein LOC111099194 isoform X1
1687,gene17915,0.359292,0.24988,0.389804,1.474075,-0.654976,5.127831,3.304294,0.069099,0.778037,7,0.12982668,turquoise,gene17915,junctophilin-1-like isoform X1
1688,gene17922,0.065381,0.067298,2.929226,11.664402,0.065202,3.971658,0.017756,0.893995,0.993796,5,0.538868648,turquoise,gene17922,SNF-related serine/threonine-protein kinase-like isoform X1
1689,gene17927,0.507709,0.397565,-0.44881,2.259617,-0.135271,3.51037,0.043559,0.834676,0.992241,3,0.724289988,yellow,gene17927,kelch-like protein 26
1690,gene17931,1.90E-05,4.80E-05,-2.870567,88.667085,-0.490123,4.029795,0.987557,0.32034,0.93226,5,0.534911099,yellow,gene17931,ataxin-2-like protein isoform X1
1691,gene17933,0.25136,0.24466,-0.54633,3.91181,0.061263,6.343039,0.053157,0.817658,0.992241,9,0.511433378,green,gene17933,unconventional myosin-XVIIIa-like isoform X1
1692,gene17944,0,0,-12.801209,55.877473,0.394499,3.336917,0.507163,0.47637,0.95729,3,0.363028797,pink,gene17944,14-3-3 protein homolog 2-like
1693,gene17955,0,0,0.55295,1.241947,-0.219033,5.666888,0.565058,0.45223,0.956091,8,0.02633897,turquoise,gene17955,LOW QUALITY PROTEIN: uncharacterized protein LOC111135183
1694,gene17959,0.00136,0.002492,4.783017,45.730414,-0.683274,4.410576,2.852588,0.091227,0.818998,6,0.467947704,brown,gene17959,LOW QUALITY PROTEIN: protein SMG9-like
1695,gene17963,0,0,10.703036,39.559347,-1.166093,3.887954,1.639405,0.200407,0.902842,4,0.324880019,turquoise,gene17963,beta-ureidopropionase-like
1696,gene17964,0.008422,0.012217,3.920773,40.668943,0.10878,6.916005,0.137573,0.710706,0.985947,10,0.290537394,blue,gene17964,ceramide glucosyltransferase-like
1697,gene17965,0,0,11.75525,7.852758,-0.135425,7.926818,0.339623,0.560047,0.974759,10,0.665415457,green,gene17965,CAP-Gly domain-containing linker protein 1-like isoform X1
1698,gene1797,0.432556,0.349807,0.316354,54.266345,-0.436692,4.046671,0.967066,0.325413,0.93226,5,0.288343763,yellow,gene1797,"beta-1,3-galactosyltransferase 5-like"
1699,gene17970,0.000461,0.000939,-2.425837,49.875481,-0.695138,3.458717,1.494817,0.221471,0.911329,3,0.267365808,blue,gene17970,glutathione S-transferase kappa 1-like
1700,gene17971,0.000727,0.001505,6.0169,76.726973,-0.012107,3.906788,0.000593,0.98058,0.998474,4,-0.016925173,turquoise,gene17971,caspase-2-like
1701,gene17972,0,0,-4.633862,61.747029,-0.182799,3.937217,0.179586,0.671729,0.983547,4,0.138439224,black,gene17972,14-3-3 protein homolog 2-like
1702,gene17979,0.019757,0.029571,-0.598591,3.213841,0.380995,3.555087,0.231081,0.630723,0.980774,3,0.219276539,turquoise,gene17979,SCO-spondin-like isoform X1
1703,gene1798,0.887745,0.557329,-0.228734,9.239231,-0.262578,3.613204,0.282372,0.595151,0.978657,4,0.123470905,turquoise,gene1798,DNA polymerase delta catalytic subunit-like
1704,gene17986,0.213272,0.210844,-0.380038,4.953592,0.467768,5.011513,0.736964,0.390635,0.940946,7,0.551555542,turquoise,gene17986,unconventional myosin-XVIIIa-like isoform X1
1705,gene17994,0.85,0.545443,-0.015477,0.55492,0.782454,3.285167,1.450121,0.228508,0.915304,3,0.637561871,turquoise,gene17994,uncharacterized protein LOC111138460 isoform X1
1706,gene18000,0.558714,0.423435,-0.225141,59.600327,-0.118094,3.742612,0.042944,0.83583,0.992241,4,0.598462857,black,gene18000,DNA replication ATP-dependent helicase/nuclease DNA2-like
1707,gene18003,0.130345,0.148792,0.895876,3.96228,-0.070303,5.010584,0.054864,0.814807,0.992241,7,0.38308335,turquoise,gene18003,uncharacterized protein LOC111137157
1708,gene18010,0.067446,0.084574,-1.687169,7.213751,0.866749,10.467674,2.244993,0.134047,0.863321,10,0.969697187,black,gene18010,uncharacterized protein LOC111136428
1709,gene18013,0,0,-15.531435,74.7401,0.043086,5.177791,0.012027,0.912672,0.993796,7,0.613835284,yellow,gene18013,protein DDI1 homolog 2-like
1710,gene18014,0,0,18.745378,42.628013,0.121232,3.780745,0.053961,0.816308,0.992241,4,0.595726318,blue,gene18014,DNA fragmentation factor subunit beta-like
1711,gene18019,0.088845,0.109538,0.062375,0.811617,-0.482197,3.604213,0.600904,0.438233,0.953855,4,0.338246807,yellow,gene18019,glyoxylate reductase/hydroxypyruvate reductase-like
1712,gene18027,0.33849,0.238495,-2.834663,7.775021,-0.245943,3.251592,0.266361,0.605784,0.978657,3,0.46257198,turquoise,gene18027,uncharacterized protein LOC111133711 isoform X1
1713,gene18035,0,0,9.904692,3.808915,-0.67106,4.82849,1.920867,0.165761,0.887552,7,0.006718486,turquoise,gene18035,transcription initiation factor TFIID subunit 10-like isoform X1
1714,gene18038,0.032731,0.042684,3.250892,51.212919,0.237768,4.196606,0.189467,0.663361,0.982916,5,0.263387038,turquoise,gene18038,leukocyte receptor cluster member 1-like
1715,gene18039,0.000744,0.001472,-8.635297,48.223269,-0.244391,3.477319,0.19088,0.662186,0.982665,3,0.170271631,brown,gene18039,synaptic vesicle 2-related protein-like
1716,gene1804,0.157613,0.162982,-0.018469,5.954392,-0.280055,9.281319,0.557129,0.455419,0.956091,10,0.524779497,green,gene1804,fibril-forming collagen alpha chain-like
1717,gene18052,0,0,-9.641248,32.226513,0.558311,4.893032,1.006447,0.315756,0.93226,7,0.451696841,pink,gene18052,transcription initiation factor TFIID subunit 10-like isoform X1
1718,gene18054,0.423178,0.318593,-0.385148,4.413469,0.051696,3.406069,0.007884,0.929245,0.993796,3,0.50042734,turquoise,gene18054,uncharacterized protein LOC111134159 isoform X1
1719,gene1807,0.931535,0.573959,0.082102,12.398631,0.008668,5.558763,0.000599,0.980473,0.998474,8,0.30465473,yellow,gene1807,26S proteasome non-ATPase regulatory subunit 14
1720,gene18076,0.026985,0.040307,0.157823,0.870608,0.38468,3.405576,0.387117,0.533818,0.967596,3,0.528656562,turquoise,gene18076,acyloxyacyl hydrolase-like
1721,gene18077,0,0,2.700829,91.998008,-0.325176,4.074934,0.486489,0.485498,0.959339,5,0.367493471,turquoise,gene18077,LOW QUALITY PROTEIN: anillin-like
1722,gene18080,0.276022,0.227836,0.187363,0.447395,0.495147,4.862986,1.85692,0.172981,0.891433,7,0.593811108,pink,gene18080,LOW QUALITY PROTEIN: transcriptional regulator Erg-like
1723,gene18084,0,0,-5.69995,84.038447,0.188416,5.420991,0.409474,0.522237,0.966188,8,0.515329922,turquoise,gene18084,enhancer of mRNA-decapping protein 4-like
1724,gene18091,0.000452,0.000965,0.260024,0.37191,1.155396,5.258604,4.572134,0.032496,0.666821,8,0.680311606,pink,gene18091,synaptic vesicle membrane protein VAT-1 homolog-like
1725,gene18092,0.068377,0.064983,-0.371441,17.735526,0.009702,5.061691,0.000939,0.975558,0.998341,7,0.103686629,turquoise,gene18092,integrator complex subunit 8-like isoform X1
1726,gene18094,0.138595,0.099444,-3.476641,36.551426,-0.174481,4.425091,0.172882,0.677563,0.983547,6,0.32560451,blue,gene18094,uncharacterized protein LOC111133343
1727,gene18095,0.013765,0.022329,-1.12898,4.112434,2.160516,4.383387,12.70219,0.000365,0.114872,6,0.491686773,green,gene18095,CD209 antigen-like
1728,gene18097,0.06671,0.049465,-1.358585,30.285652,0.175434,3.573603,0.08353,0.772569,0.987969,3,0.214069112,turquoise,gene18097,uncharacterized protein YMR196W-like
1729,gene18098,0.355933,0.248363,-3.703957,43.706409,-0.494594,5.783543,1.836659,0.175343,0.891743,8,0.230352795,turquoise,gene18098,"alanine--glyoxylate aminotransferase 2, mitochondrial-like"
1730,gene18100,0,0,7.844248,83.288441,-0.167153,4.742452,0.174309,0.67631,0.983547,6,0.055410496,turquoise,gene18100,CCR4-NOT transcription complex subunit 10-like
1731,gene18102,0.003993,0.007328,-3.765481,19.766157,1.201289,4.530088,1.552991,0.212694,0.908487,6,0.814855544,turquoise,gene18102,uncharacterized protein LOC111132099
1732,gene18107,3.80E-05,9.00E-05,-6.770246,64.511945,0.25663,4.856353,0.60106,0.438174,0.953855,7,0.395804833,blue,gene18107,trafficking protein particle complex subunit 8-like isoform X1
1733,gene18108,0.124962,0.143785,5.138469,47.342547,0.454526,4.257457,1.396346,0.237336,0.916485,5,0.375847406,blue,gene18108,membrane-bound transcription factor site-1 protease-like isoform X1
1734,gene1811,0.003963,0.006329,-3.686001,64.791855,0.087881,7.276606,0.100489,0.751244,0.987969,10,0.493052373,yellow,gene1811,pumilio homolog 2-like isoform X1
1735,gene18113,0.016205,0.024165,0.214609,0.376497,-0.304301,4.063448,0.238581,0.625233,0.979867,5,0.654335321,red,gene18113,LOW QUALITY PROTEIN: uncharacterized protein LOC111132244
1736,gene18123,0.291506,0.217363,-3.466997,30.93393,-0.158864,5.07083,0.213929,0.643705,0.981108,7,0.227280663,turquoise,gene18123,uncharacterized protein LOC111135951
1737,gene18126,0.270329,0.207342,-4.80906,58.92212,-0.330327,3.589263,0.40513,0.524452,0.967156,4,0.409787869,yellow,gene18126,TP53-regulating kinase-like isoform X1
1738,gene18129,0.000697,0.001446,3.341388,62.479941,-0.178589,6.125187,0.261668,0.608976,0.978657,9,0.403890056,blue,gene18129,DDB1- and CUL4-associated factor 11-like isoform X1
1739,gene18130,0.006394,0.010001,2.670587,53.616544,0.763308,3.393893,2.241367,0.134362,0.863321,3,0.237259186,turquoise,gene18130,hepatocyte nuclear factor 4-gamma-like isoform X1
1740,gene18131,0.066771,0.075779,-10.467788,60.45712,0.029812,7.681871,0.00773,0.929941,0.993796,10,0.689443667,blue,gene18131,"aspartate aminotransferase, mitochondrial-like"
1741,gene18132,0.003884,0.006419,0.93413,2.695238,0.15486,5.236178,0.017919,0.893513,0.993796,7,0.032743128,turquoise,gene18132,helicase with zinc finger domain 2-like isoform X1
1742,gene18134,0,0,19.527145,8.964117,0.411847,4.271694,1.023569,0.311674,0.93226,5,0.315648257,turquoise,gene18134,kinesin-like protein KIF15
1743,gene18137,0.460599,0.373175,-0.993576,62.141931,0.088777,5.255051,0.074386,0.785055,0.988825,8,0.537215873,green,gene18137,high mobility group B protein 6-like
1744,gene18141,0.131741,0.118526,0.897948,14.63971,-0.072885,5.48644,0.035121,0.851343,0.993016,8,0.708545162,turquoise,gene18141,uncharacterized protein LOC111138013 isoform X1
1745,gene18142,0.272369,0.208352,-8.220054,55.246751,-0.438806,5.75207,2.361668,0.124349,0.856387,8,0.321713562,green,gene18142,cytoplasmic tRNA 2-thiolation protein 2-like isoform X1
1746,gene18143,0.042366,0.052764,4.993453,20.667978,-0.216094,4.662743,0.371509,0.542183,0.969301,6,0.27111209,turquoise,gene18143,nucleoporin SEH1-like
1747,gene18148,0.34283,0.26453,0.394857,1.744495,0.188658,3.205217,0.100884,0.750771,0.987969,2,0.597332622,red,gene18148,small conductance calcium-activated potassium channel protein-like
1748,gene18150,0.000184,0.000413,5.206488,63.77006,-0.045923,5.962887,0.022394,0.881043,0.993796,9,0.564104285,green,gene18150,chromodomain Y-like protein
1749,gene18154,0.022048,0.027907,3.517318,67.817431,-0.053951,5.183862,0.030422,0.861535,0.993745,7,0.537829178,green,gene18154,LOW QUALITY PROTEIN: RNA polymerase II subunit A C-terminal domain phosphatase-like
1750,gene18156,0.005678,0.009415,9.133056,40.555925,0.086566,3.961641,0.031956,0.858125,0.993125,4,0.501688923,purple,gene18156,uncharacterized protein LOC111137294 isoform X1
1751,gene1816,0.04137,0.054325,1.453634,29.02545,0.028468,5.158085,0.004622,0.9458,0.996244,7,0.557061259,green,gene1816,alpha-tocopherol transfer protein-like isoform X1
1752,gene18168,0.414857,0.285611,0.130128,7.510376,-0.32906,3.901089,0.13012,0.718308,0.98622,4,0.888748633,turquoise,gene18168,atrial natriuretic peptide receptor 1-like
1753,gene18172,0,0,-4.574843,1.69933,-1.035725,4.121551,1.502676,0.22026,0.911329,5,0.060425489,turquoise,gene18172,uncharacterized protein LOC111137564
1754,gene18174,0.176666,0.164854,-3.730046,16.806377,-0.733625,5.403424,1.860506,0.172566,0.891086,8,0.000262323,turquoise,gene18174,uncharacterized protein LOC111137072 isoform X1
1755,gene18177,5.00E-06,1.30E-05,-3.460614,27.847307,-0.00428,3.326998,6.90E-05,0.993356,0.999244,3,0.108354739,turquoise,gene18177,AFG3-like protein 2
1756,gene18183,1.00E-06,2.00E-06,4.648864,47.020721,0.548407,4.471686,1.060348,0.303136,0.93226,6,0.504292075,yellow,gene18183,uncharacterized protein LOC111099226
1757,gene18204,1.90E-05,4.70E-05,-3.947511,64.022621,-0.017662,4.864435,0.002498,0.960138,0.997272,7,0.530920102,blue,gene18204,LOW QUALITY PROTEIN: flap endonuclease 1-like
1758,gene18209,0.030761,0.045106,-0.764879,2.918966,1.093015,3.985925,4.585054,0.032252,0.666821,5,0.304359724,blue,gene18209,LOW QUALITY PROTEIN: small conductance calcium-activated potassium channel protein 2-like
1759,gene18217,0.408475,0.34354,0.599728,2.159867,1.480733,5.19958,6.564742,0.010402,0.494157,7,0.514429879,green,gene18217,"ATP-dependent RNA helicase DEAH12, chloroplastic-like"
1760,gene18218,0.43011,0.355954,-0.075741,1.123156,1.026386,5.22283,4.941328,0.026222,0.628729,7,0.225792472,turquoise,gene18218,"ATP-dependent RNA helicase DEAH12, chloroplastic-like"
1761,gene1822,0.153919,0.122145,-1.46298,11.980386,0.684081,7.192816,8.347923,0.003861,0.369232,10,0.602237667,pink,gene1822,leucine-rich repeat protein SHOC-2-like
1762,gene18224,0.002599,0.004934,-3.18374,7.722379,-0.421137,5.51719,0.703532,0.401599,0.944652,8,0.454643574,brown,gene18224,twisted gastrulation protein homolog 1-B-like
1763,gene18226,0.929531,0.57339,-0.069088,0.719443,-0.059424,4.947312,0.01401,0.905779,0.993796,7,0.175300443,red,gene18226,glucose-6-phosphate isomerase-like
1764,gene18233,0,0,10.003898,39.87564,-0.52948,7.240408,3.340437,0.067597,0.778037,10,0.527041553,green,gene18233,"ATP-dependent RNA helicase DEAH12, chloroplastic-like"
1765,gene18234,0.732267,0.500053,0.45994,23.124853,-0.389386,5.749471,1.190548,0.275219,0.928733,8,0.319754619,turquoise,gene18234,"ATP-dependent RNA helicase DEAH12, chloroplastic-like"
1766,gene18240,0.268078,0.227873,0.41125,19.449735,-0.04975,4.641423,0.00511,0.943013,0.995637,6,0.215393744,turquoise,gene18240,twisted gastrulation protein homolog 1-B-like
1767,gene18242,0,0,18.836959,81.575008,0.919923,5.011166,2.478703,0.115397,0.84662,7,0.374058411,black,gene18242,glucose-6-phosphate isomerase-like
1768,gene18243,0.051157,0.0697,1.604679,7.922995,-0.472201,6.497235,0.261727,0.608936,0.978657,9,0.46525036,turquoise,gene18243,"cytochrome c1-2, heme protein, mitochondrial-like"
1769,gene18247,4.00E-05,9.40E-05,-5.417274,37.029733,-0.269001,5.190331,0.748464,0.386963,0.939868,7,0.417430546,blue,gene18247,protein FAM192A-like
1770,gene18248,0.000312,0.000652,1.656718,2.372686,0.164796,3.893295,0.029761,0.863034,0.993745,4,0.778981357,turquoise,gene18248,uncharacterized protein LOC111134030 isoform X1
1771,gene1825,0.197396,0.144095,-1.789688,26.521512,-0.147519,5.854567,0.078809,0.778918,0.988002,9,0.671738436,turquoise,gene1825,low-density lipoprotein receptor-related protein 4-like isoform X1
1772,gene1826,0,0,-3.479614,6.902704,0.356674,5.211112,1.326118,0.249497,0.921675,7,0.120852033,turquoise,gene1826,phosphatidylinositol 4-phosphate 3-kinase C2 domain-containing subunit alpha-like isoform X1
1773,gene18267,0,0,4.662156,18.749858,1.175239,4.322038,1.43369,0.231163,0.916332,5,0.054152498,turquoise,gene18267,stimulated by retinoic acid gene 6 protein-like isoform X1
1774,gene18270,0.044452,0.05488,0.452082,0.526835,-0.416968,4.656121,0.304303,0.581198,0.977018,6,0.62292316,turquoise,gene18270,hepatitis A virus cellular receptor 1-like isoform X1
1775,gene1828,0.543777,0.416253,-0.097726,0.487062,-0.242452,4.714339,0.166137,0.683568,0.98412,6,0.15838038,black,gene1828,uncharacterized protein LOC111116791
1776,gene18294,0.133279,0.091287,-5.154924,14.569544,0.416811,6.822937,0.871344,0.350584,0.93226,10,0.687494931,black,gene18294,agrin-like isoform X1
1777,gene18300,0.34821,0.308415,0.805073,8.054041,0.056976,5.147905,0.011133,0.91597,0.993796,7,0.595562861,purple,gene18300,myb-like protein J isoform X5
1778,gene18308,0.165695,0.134075,1.421139,13.429699,0.020978,5.840859,0.001312,0.971103,0.998341,9,0.512095222,turquoise,gene18308,uncharacterized protein LOC111137125
1779,gene1831,0.592625,0.439235,-0.253634,0.455243,-0.147829,7.343782,0.350715,0.553709,0.972615,10,0.468240843,green,gene1831,dual specificity protein phosphatase 3-like
1780,gene18314,0.117714,0.12273,0.546561,13.04597,-0.673233,4.621376,1.346364,0.245915,0.920884,6,0.325064982,turquoise,gene18314,"proline dehydrogenase 1, mitochondrial-like isoform X1"
1781,gene18318,0,0,-1.719805,5.736985,-0.962341,3.867253,0.854789,0.355201,0.93226,4,0.583751942,turquoise,gene18318,homeobox protein caupolican-like
1782,gene18319,0.205985,0.136212,4.201211,38.844129,0.887178,3.364623,1.695557,0.19287,0.89842,3,0.830228261,turquoise,gene18319,5-oxoprolinase-like
1783,gene18322,0.504332,0.394386,-0.186477,7.771174,0.16161,4.069062,0.128535,0.719956,0.98622,5,0.71014481,turquoise,gene18322,uncharacterized protein LOC111136001 isoform X1
1784,gene18324,0.047052,0.055787,-0.28829,77.599129,0.163903,7.048433,0.471596,0.492254,0.959914,10,0.73343052,green,gene18324,Golgi apparatus protein 1-like
1785,gene18329,0.329915,0.235572,-0.319949,1.548241,-0.33786,4.69394,0.339331,0.560216,0.974759,6,0.590157234,greenyellow,gene18329,protein asteroid homolog 1-like isoform X1
1786,gene18331,0.008641,0.014745,1.991095,68.8751,0.083336,6.945461,0.074613,0.784735,0.988825,10,0.448426667,brown,gene18331,Dolichyl-diphosphooligosaccharide--protein glycosyltransferase subunit DAD1 (Oligosaccharyl transferase subunit DAD1) (Defender against cell death 1) (DAD-1)
1787,gene18332,0.019082,0.029833,-0.423027,2.054664,0.132723,4.745781,0.162887,0.686513,0.98412,6,0.55452347,green,gene18332,uncharacterized protein LOC111135314
1788,gene18333,0.446623,0.280406,-4.377635,14.223829,-1.547539,4.749941,4.13448,0.042018,0.700527,6,0.726716005,turquoise,gene18333,coiled-coil domain-containing protein 30-like isoform X3
1789,gene18334,1.00E-06,3.00E-06,-0.423585,0.917049,-0.227264,6.651841,0.185959,0.666302,0.983434,9,0.588153148,greenyellow,gene18334,uncharacterize lncRNA
1790,gene18337,0.359679,0.315226,-0.561007,86.968776,-0.157708,4.899014,0.173108,0.677364,0.983547,7,0.111156943,brown,gene18337,COX assembly mitochondrial protein 2 homolog
1791,gene1834,0.021481,0.033101,-3.115739,44.694925,-1.005163,4.341989,3.902919,0.048202,0.728303,5,0.391847673,yellow,gene1834,probable tubulin polyglutamylase TTLL1
1792,gene18342,3.60E-05,8.90E-05,-5.908374,25.194241,0.212514,3.424249,0.156646,0.692264,0.984124,3,0.287380456,blue,gene18342,uncharacterized protein LOC111137971 isoform X1
1793,gene1835,0,0,-34.625874,44.098973,-0.44651,4.681211,1.127131,0.288388,0.929262,6,-0.055361492,turquoise,gene1835,transmembrane protein 41B-like isoform X1
1794,gene18359,0.501088,0.372137,0.159478,33.013587,0.142885,3.609797,0.080868,0.776125,0.987969,4,0.397373724,turquoise,gene18359,"beta-1,3-glucosyltransferase-like"
1795,gene18370,0.410643,0.267557,-1.721079,12.765268,-0.304332,6.082546,0.175975,0.674855,0.983547,9,0.784851814,turquoise,gene18370,LOW QUALITY PROTEIN: sal-like protein 3
1796,gene18375,0.000262,0.000579,-2.591772,50.962193,0.449068,4.651016,1.077598,0.299235,0.931462,6,0.170100034,turquoise,gene18375,LOW QUALITY PROTEIN: tRNA (cytosine(34)-C(5))-methyltransferase-like
1797,gene18376,0.038861,0.049196,1.799528,6.064332,-0.336763,6.167334,0.597003,0.439724,0.953855,9,0.749257011,turquoise,gene18376,LOW QUALITY PROTEIN: A disintegrin and metalloproteinase with thrombospondin motifs 18-like
1798,gene18377,0,0,-3.902706,84.385468,0.424178,4.478853,0.87536,0.349476,0.93226,6,0.362957952,turquoise,gene18377,LOW QUALITY PROTEIN: kelch domain-containing protein 4-like
1799,gene18380,0,0,-10.937271,62.905071,-0.232868,3.705996,0.165214,0.684401,0.98412,4,0.22567343,turquoise,gene18380,"zinc finger CCHC domain-containing protein 14-like, partial"
1800,gene18381,0,0,7.289598,86.490297,0.559832,6.731202,1.645403,0.199586,0.90158,10,0.832140794,black,gene18381,E3 ubiquitin-protein ligase Su(dx)-like isoform X1
1801,gene18387,0.705515,0.479327,0.045992,0.563084,-0.326541,5.478297,0.203595,0.651834,0.981108,8,0.832593022,turquoise,gene18387,beta-hexosaminidase subunit alpha-like isoform X1
1802,gene18390,0.27756,0.218071,-0.172172,1.580053,0.628156,6.358713,1.865879,0.171948,0.890849,9,0.911581714,black,gene18390,"LOW QUALITY PROTEIN: inositol 1,4,5-trisphosphate receptor type 2-like"
1803,gene18395,0.395605,0.280227,0.389126,1.020655,0.221327,7.236644,0.749992,0.386479,0.939715,10,0.630641975,pink,gene18395,guanine nucleotide-binding protein G(o) subunit alpha
1804,gene18397,0.006514,0.00978,1.940484,32.24604,0.326789,3.645754,0.458912,0.498133,0.960259,4,0.194514252,brown,gene18397,THO complex subunit 6 homolog
1805,gene18398,0.001766,0.003451,-2.090006,5.396883,0.028499,3.92376,0.003516,0.952719,0.997184,4,0.550307239,green,gene18398,LOW QUALITY PROTEIN: F-box/LRR-repeat protein 3-like
1806,gene18399,0.129663,0.114959,-6.026192,16.246126,-0.40096,3.239332,0.5656,0.452013,0.956091,3,0.335841998,red,gene18399,"LOW QUALITY PROTEIN: lon protease homolog 2, peroxisomal-like"
1807,gene18403,1.00E-06,4.00E-06,-3.588193,84.320052,-0.221511,4.118026,0.314484,0.574942,0.976289,5,0.325105048,turquoise,gene18403,LOW QUALITY PROTEIN: NEDD8-activating enzyme E1 regulatory subunit-like
1808,gene18420,0.394179,0.26096,2.164426,44.02709,-0.389044,5.425156,0.646978,0.421195,0.950565,8,0.645245861,turquoise,gene18420,L-fucose kinase-like isoform X1
1809,gene18429,0,0,-1.813614,3.143745,-0.559502,6.428637,1.470296,0.225299,0.911329,9,0.812511006,blue,gene18429,uncharacterized protein LOC111135960
1810,gene18432,0.061722,0.081429,-0.984086,43.957134,-0.506358,5.620392,0.788039,0.374694,0.939089,8,0.863175292,turquoise,gene18432,fibropellin-1-like isoform X1
1811,gene18433,0.000268,0.000592,-1.150661,4.29864,0.035216,3.175947,0.002859,0.957355,0.997184,2,0.456063547,turquoise,gene18433,small integral membrane protein 14-like
1812,gene18434,0,0,12.717563,51.759083,0.824376,3.587477,2.788944,0.094917,0.82474,4,0.132415476,turquoise,gene18434,bleomycin hydrolase-like
1813,gene18445,0,0,14.628226,43.771643,-1.002026,5.949306,1.744408,0.186581,0.896825,9,0.446125102,blue,gene18445,macrophage migration inhibitory factor-like
1814,gene18451,0.037486,0.053559,0.62266,1.429871,-0.536023,5.223958,1.934378,0.16428,0.886392,7,0.0810828,turquoise,gene18451,NEDD8
1815,gene18452,0,0,-2.206395,5.527664,0.344745,3.225672,0.374852,0.540371,0.969001,3,0.443366431,pink,gene18452,adenine phosphoribosyltransferase-like
1816,gene18455,0.002321,0.004446,-2.393599,4.305334,0.159726,4.908294,0.163274,0.68616,0.98412,7,0.356475299,black,gene18455,E3 ubiquitin-protein ligase ZNRF2-like
1817,gene1846,0.390087,0.270593,3.405649,14.740491,-0.034328,4.790429,0.008099,0.928291,0.993796,7,0.266689178,blue,gene1846,exostosin-like 3
1818,gene18465,0.08657,0.092418,-8.444979,46.960546,-0.23771,3.868738,0.123504,0.725265,0.98622,4,0.591869319,turquoise,gene18465,bleomycin hydrolase-like
1819,gene1847,0,0,-8.792349,8.006999,0.461955,4.246842,0.330663,0.565269,0.974934,5,0.451184957,pink,gene1847,ras-related GTP-binding protein C-like
1820,gene18478,0.00088,0.001799,-4.701112,12.378242,-0.52913,3.946174,0.915325,0.338705,0.93226,4,0.359044698,turquoise,gene18478,putative uncharacterized transmembrane protein DDB_G0290991 isoform X1
1821,gene1848,0.658554,0.468953,-0.028402,0.323053,0.31156,5.159775,0.386011,0.534404,0.967596,7,0.303683592,blue,gene1848,cadherin EGF LAG seven-pass G-type receptor 2-like isoform X3
1822,gene18487,0,0,29.978039,60.327218,-0.239435,4.752248,0.250723,0.616566,0.978657,6,0.505976348,black,gene18487,docking protein 5-like isoform X1
1823,gene18488,0.051915,0.070553,3.431942,63.551561,0.053405,5.692793,0.022071,0.881899,0.993796,8,0.3820833,yellow,gene18488,E3 ubiquitin-protein ligase ZNRF2-like
1824,gene18498,0.039026,0.055449,-2.16435,64.106131,-0.177166,5.811745,0.331534,0.564757,0.974934,8,0.334506241,turquoise,gene18498,LOW QUALITY PROTEIN: cleavage and polyadenylation specificity factor subunit 1-like
1825,gene18502,0.336766,0.237664,-1.714538,39.702829,-0.588533,9.526402,3.243472,0.071709,0.785145,10,0.473891664,magenta,gene18502,LOW QUALITY PROTEIN: adenosylhomocysteinase A-like
1826,gene18503,0.495809,0.391481,0.769015,48.81852,-1.331706,4.156535,3.847851,0.04981,0.732911,5,0.618196071,yellow,gene18503,LOW QUALITY PROTEIN: adenosylhomocysteinase A-like
1827,gene18505,0.359476,0.31508,-0.113567,0.763679,0.081569,3.585308,0.018074,0.893055,0.993796,3,0.016750037,turquoise,gene18505,protein unc-93 homolog A-like isoform X1
1828,gene18506,0.011779,0.019443,1.654122,5.627581,0.677454,3.240785,1.355463,0.244325,0.920884,3,0.738113575,black,gene18506,LOW QUALITY PROTEIN: uncharacterized protein LOC111132276
1829,gene18509,0.561007,0.418203,0.219043,3.05979,0.586312,8.506692,1.481951,0.223469,0.911329,10,0.893314911,black,gene18509,uncharacterized protein LOC111135144
1830,gene18516,0.234743,0.18622,9.295292,10.257773,0.595791,4.328695,1.796032,0.180193,0.893782,5,0.260173841,black,gene18516,type-1 angiotensin II receptor-associated protein-like
1831,gene18518,0.067122,0.087143,3.211369,8.314058,0.214688,6.268166,0.193939,0.659659,0.982155,9,0.87031218,black,gene18518,LOW QUALITY PROTEIN: sterile alpha and TIR motif-containing protein 1-like
1832,gene18521,0.095263,0.115949,0.895802,2.867203,-0.258899,3.506172,0.223785,0.636171,0.981108,3,0.478113916,blue,gene18521,LOW QUALITY PROTEIN: uncharacterized protein LOC111132278
1833,gene18528,0.048761,0.05907,-3.495156,2.981027,-0.37109,5.177591,1.021837,0.312084,0.93226,7,0.289201316,brown,gene18528,LOW QUALITY PROTEIN: uncharacterized protein LOC111137580
1834,gene18531,0.715879,0.493784,0.062693,0.450242,0.111505,4.007302,0.020862,0.885157,0.993796,5,0.64649764,turquoise,gene18531,LOW QUALITY PROTEIN: ectonucleotide pyrophosphatase/phosphodiesterase family member 6-like
1835,gene18534,1.20E-05,3.00E-05,-0.764685,1.271789,-0.106055,6.072823,0.118901,0.730229,0.986801,9,0.429944481,yellow,gene18534,LOW QUALITY PROTEIN: angiotensin-converting enzyme-like
1836,gene18538,0.260336,0.250799,0.14076,2.112633,0.293486,3.611433,0.431935,0.511041,0.964299,4,0.268344917,yellow,gene18538,LOW QUALITY PROTEIN: uncharacterized protein LOC111133245
1837,gene18539,0.01181,0.016624,0.364768,14.455179,-0.380405,5.731396,0.51311,0.473796,0.957213,8,0.822019151,red,gene18539,LOW QUALITY PROTEIN: tetratricopeptide repeat protein 28-like
1838,gene18540,0.003206,0.005808,5.476276,9.109031,-0.470195,3.509865,0.765937,0.381477,0.939236,3,0.450573452,black,gene18540,uncharacterized protein LOC111132279
1839,gene18545,0.02159,0.030242,15.017624,10.862663,-0.218101,4.374498,0.227381,0.633473,0.980834,6,0.227322236,pink,gene18545,"LOW QUALITY PROTEIN: putative all-trans-retinol 13,14-reductase"
1840,gene18547,0.351934,0.269287,2.780073,51.211796,0.48008,4.923279,1.847072,0.174124,0.891743,7,0.593296816,red,gene18547,LOW QUALITY PROTEIN: ubiquitin carboxyl-terminal hydrolase 32-like
1841,gene18555,0,0,2.302184,70.26479,-0.436314,6.735424,1.963167,0.161175,0.884593,10,0.556155081,brown,gene18555,sin3 histone deacetylase corepressor complex component SDS3-like isoform X1
1842,gene18556,2.30E-05,5.50E-05,-2.057878,29.101448,0.074403,5.527114,0.060033,0.806444,0.991016,8,0.104058996,turquoise,gene18556,signal peptide peptidase-like 3
1843,gene18561,0.310145,0.284115,2.574405,17.886652,-0.036623,3.830211,0.006071,0.937893,0.994931,4,0.381711912,turquoise,gene18561,transmembrane protein 248-like isoform X1
1844,gene18562,0,0,1.305893,2.079516,-0.519781,5.519999,3.346104,0.067364,0.778037,8,0.454095067,green,gene18562,max-binding protein MNT-like
1845,gene18563,0.508118,0.397752,0.501654,42.587387,-0.206571,5.109739,0.265927,0.606077,0.978657,7,0.383019968,brown,gene18563,ADP-ribosylation factor-like protein 6-interacting protein 4
1846,gene18564,0.072387,0.08898,0.151661,32.228676,-0.230367,6.74966,0.48184,0.48759,0.959339,10,0.858095259,blue,gene18564,leucine-rich repeat-containing protein 43-like isoform X1
1847,gene18570,8.00E-06,2.10E-05,-3.975199,60.45858,0.077098,4.05753,0.030354,0.86169,0.993745,5,0.321899573,yellow,gene18570,"39S ribosomal protein L18, mitochondrial-like"
1848,gene18571,0,1.00E-06,2.995453,60.041519,-0.700941,3.446185,1.441808,0.229847,0.915304,3,-0.03272962,turquoise,gene18571,notchless protein homolog 1-like
1849,gene18574,0.316255,0.252098,2.569218,14.740502,0.266103,4.865629,0.587389,0.44343,0.954654,7,0.470690264,turquoise,gene18574,LOW QUALITY PROTEIN: E3 ubiquitin-protein ligase ZNRF3-like
1850,gene18580,0.035671,0.051338,-0.697237,0.997546,-0.368927,4.820293,0.618619,0.431561,0.95203,7,0.563924222,red,gene18580,LOW QUALITY PROTEIN: alpha-2A adrenergic receptor-like
1851,gene18594,0.059058,0.072425,-0.14815,0.532746,0.116026,6.3834,0.10414,0.746916,0.987969,9,0.491402317,blue,gene18594,uncharacterized protein LOC111135846
1852,gene18597,0.091775,0.096678,0.013427,1.226323,-0.022286,3.710888,0.002002,0.964314,0.997988,4,0.069606648,turquoise,gene18597,protein ABHD15-like
1853,gene18599,1.20E-05,3.10E-05,0.489284,1.14587,0.411311,4.933726,1.048997,0.305738,0.93226,7,0.213776995,turquoise,gene18599,uncharacterized protein LOC111132992 isoform X1
1854,gene18607,1.40E-05,3.60E-05,-5.143621,71.462993,0.169565,5.81725,0.188541,0.664133,0.982916,8,0.617281787,green,gene18607,LOW QUALITY PROTEIN: atrophin-1-like
1855,gene18609,0.855151,0.547452,0.112187,0.664715,0.220071,5.445786,0.593138,0.441208,0.953855,8,0.476472697,pink,gene18609,uncharacterized protein LOC111136531 isoform X1
1856,gene18610,0.119447,0.117957,3.355912,24.563183,0.184137,7.483047,0.517101,0.472081,0.956254,10,0.579064476,green,gene18610,neurofilament heavy polypeptide-like
1857,gene18624,0.02737,0.040796,-1.295468,1.273222,0.329629,3.063292,0.379607,0.537814,0.96884,2,0.115805142,turquoise,gene18624,LOW QUALITY PROTEIN: N-lysine methyltransferase setd6-like
1858,gene18626,0.055783,0.065711,4.855609,29.921802,1.418665,3.341638,7.576295,0.005914,0.40927,3,0.627891467,green,gene18626,endothelin-converting enzyme homolog isoform X1
1859,gene18635,0.06452,0.073851,0.19881,1.068943,-1.172333,3.548864,4.420948,0.0355,0.692337,3,0.364916058,yellow,gene18635,sodium- and chloride-dependent neutral and basic amino acid transporter B(0+)-like isoform X1
1860,gene18640,0,0,-19.824559,30.683548,0.084204,4.65709,0.047652,0.827201,0.992241,6,0.685203695,green,gene18640,microprocessor complex subunit DGCR8-like
1861,gene18642,0.692774,0.484073,0.367516,68.608456,-0.216519,5.681766,0.50291,0.478224,0.958053,8,0.787138929,blue,gene18642,protein HOS4-like isoform X5
1862,gene18645,0.271967,0.258841,1.10835,1.662389,0.869225,6.836209,2.383809,0.122598,0.854855,10,0.548234304,yellow,gene18645,uncharacterize lncRNA
1863,gene18649,0.559559,0.423784,-0.482942,3.958612,-0.239774,5.945957,0.207167,0.648997,0.981108,9,0.630721344,yellow,gene18649,LOW QUALITY PROTEIN: uncharacterized protein LOC111136150
1864,gene18651,0,0,3.271263,74.962639,-0.511719,6.081786,1.269893,0.259787,0.925081,9,0.653072119,brown,gene18651,LOW QUALITY PROTEIN: lysine--tRNA ligase-like
1865,gene18652,0.250698,0.19712,1.933979,3.4801,0.007334,5.121653,0.000565,0.981038,0.998583,7,0.291027402,blue,gene18652,"beta-1,4-galactosyltransferase galt-1-like"
1866,gene18653,0.001635,0.003211,-0.125101,1.131385,0.254003,6.362005,0.539316,0.462716,0.956091,9,0.272090053,turquoise,gene18653,LOW QUALITY PROTEIN: interferon regulatory factor 8-like
1867,gene18654,0.373899,0.268437,1.299706,24.41106,0.533746,7.530013,1.454422,0.22782,0.914808,10,0.957524932,black,gene18654,mitochondrial import inner membrane translocase subunit Tim21-like
1868,gene18655,0,0,-2.588647,56.85649,0.054897,4.11777,0.019303,0.889502,0.993796,5,0.308798093,blue,gene18655,mediator of RNA polymerase II transcription subunit 10-like
1869,gene18656,0.136409,0.114659,2.966298,56.083056,-0.540669,3.857434,0.914059,0.33904,0.93226,4,0.51897461,turquoise,gene18656,insulin-like growth factor 1 receptor
1870,gene18658,0.232524,0.156155,0.901456,0.29755,-0.178979,3.897644,0.142021,0.706281,0.985478,4,-0.09732132,turquoise,gene18658,LOW QUALITY PROTEIN: calbindin-32-like
1871,gene18666,0.000422,0.000904,6.285673,28.325363,0.013653,5.250155,0.001078,0.973811,0.998341,8,0.510075056,black,gene18666,sorting nexin-16-like
1872,gene18668,0.202342,0.208308,-1.545407,59.998321,-0.967144,4.053756,3.808317,0.050999,0.737164,5,0.35164559,brown,gene18668,LOW QUALITY PROTEIN: exosome complex exonuclease RRP44-like
1873,gene18672,0,0,-9.718501,6.815226,-0.683846,6.233202,2.7203,0.099079,0.825168,9,0.190553971,blue,gene18672,LOW QUALITY PROTEIN: T-box transcription factor TBX20-like
1874,gene18678,4.00E-06,1.00E-05,2.54085,39.714151,-0.027886,8.034822,0.007125,0.93273,0.993796,10,0.895492903,blue,gene18678,LOW QUALITY PROTEIN: coiled-coil domain-containing protein 63-like
1875,gene18679,0.47457,0.322634,0.079252,0.401727,-0.273362,3.970356,0.172799,0.677636,0.983547,5,0.346420902,turquoise,gene18679,LOW QUALITY PROTEIN: neprilysin-2-like
1876,gene18680,0.377212,0.250584,-3.247429,16.819246,-0.310293,5.998459,1.381311,0.239878,0.917696,9,0.64313683,turquoise,gene18680,arginine-glutamic acid dipeptide repeats protein-like isoform X1
1877,gene18686,0.216417,0.219283,0.14919,0.251972,-0.216861,4.234681,0.074955,0.784254,0.988825,5,0.27415595,turquoise,gene18686,uncharacterized protein LOC111136293
1878,gene18695,0.048836,0.05236,2.716974,33.271992,0.374185,4.546913,1.313201,0.251816,0.921675,6,0.26126517,turquoise,gene18695,LOW QUALITY PROTEIN: chloride channel protein 2-like
1879,gene18696,0.193566,0.145097,-0.979224,23.328775,-0.307186,7.013122,1.736549,0.187577,0.897203,10,0.677999092,turquoise,gene18696,LOW QUALITY PROTEIN: tumor protein 63-like
1880,gene187,0.350295,0.304351,0.398467,2.474996,0.656609,9.333612,1.358028,0.243879,0.920765,10,0.970482266,black,gene187,protocadherin Fat 4-like
1881,gene18702,0.410119,0.344585,-0.459751,7.484343,-0.617576,9.965568,1.246464,0.264229,0.925081,10,0.453158808,greenyellow,gene18702,uncharacterized protein LOC111134876 isoform X1
1882,gene18710,0.056686,0.075932,-0.1846,0.288253,-0.06112,5.966048,0.029679,0.86322,0.993796,9,0.611481155,blue,gene18710,uncharacterized protein LOC111137240
1883,gene18711,0.12304,0.120524,5.081454,3.294165,0.485651,5.63748,2.629415,0.1049,0.83528,8,0.685794011,pink,gene18711,LOW QUALITY PROTEIN: uncharacterized protein LOC111134441
1884,gene18713,0.873811,0.554407,-0.003885,0.417776,-0.309928,4.053835,0.518596,0.471441,0.956091,5,0.621612448,blue,gene18713,tripartite motif-containing protein 2-like
1885,gene18715,0.260411,0.187206,-10.11961,14.484147,-0.241277,4.45792,0.335749,0.562293,0.974759,6,0.313880116,turquoise,gene18715,nucleoside diphosphate-linked moiety X motif 8-like isoform X1
1886,gene18717,0.287067,0.199074,-0.814692,6.96672,-0.61656,6.975209,1.713844,0.190487,0.89842,10,0.438645492,greenyellow,gene18717,uncharacterized protein LOC111138493 isoform X1
1887,gene1873,0.822678,0.535498,-0.034952,0.368283,0.423316,6.762958,1.027343,0.310783,0.93226,10,0.826783908,turquoise,gene1873,MOB kinase activator 2-like isoform X1
1888,gene18739,0.004784,0.008645,2.471903,9.210009,-0.723654,3.408356,0.893731,0.344468,0.93226,3,0.418275525,greenyellow,gene18739,"glutamyl-tRNA(Gln) amidotransferase subunit C, mitochondrial-like"
1889,gene1874,0,0,-12.461734,46.439992,0.113053,4.252545,0.072305,0.788009,0.988924,5,0.211734825,turquoise,gene1874,NAD-dependent protein deacetylase sirtuin-1-like isoform X1
1890,gene18741,0,0,4.229376,15.685011,1.087429,3.397709,3.427879,0.064104,0.772041,3,0.560537231,purple,gene18741,probable ATP-dependent RNA helicase DHX37
1891,gene18768,1.00E-06,2.00E-06,5.642165,22.646569,0.536664,4.350694,0.373324,0.541198,0.969238,5,0.658150998,turquoise,gene18768,"b(0,+)-type amino acid transporter 1-like isoform X1"
1892,gene18773,0.0588,0.078245,-0.174202,0.44238,-0.847928,3.729843,1.890756,0.169117,0.888303,4,0.168039167,brown,gene18773,"N-alpha-acetyltransferase 38, NatC auxiliary subunit-like"
1893,gene1878,0,0,-1.616842,0.836593,-0.280822,4.501437,0.383983,0.535479,0.967596,6,0.49539933,magenta,gene1878,glucoside xylosyltransferase 2-like
1894,gene18783,0.95552,0.581924,-0.06865,8.539525,-0.286518,3.408309,0.202512,0.652701,0.981108,3,0.10730272,turquoise,gene18783,thioredoxin-related transmembrane protein 2 homolog
1895,gene18784,0.324821,0.232507,7.046535,7.715306,-0.043898,4.503061,0.009669,0.921671,0.993796,6,0.173706074,turquoise,gene18784,uncharacterized protein LOC111135118 isoform X1
1896,gene18793,0.000519,0.00105,9.902487,62.813238,0.789494,4.457082,2.901648,0.088489,0.818107,6,0.371439598,green,gene18793,LOW QUALITY PROTEIN: chromodomain-helicase-DNA-binding protein 8-like
1897,gene18794,0.755954,0.509897,0.042067,0.358726,-0.620347,3.947529,0.861702,0.353263,0.93226,4,0.297934348,turquoise,gene18794,pleckstrin homology domain-containing family G member 4B-like isoform X2
1898,gene18803,0,0,-15.068501,50.744926,-0.354217,6.00295,0.535562,0.464278,0.956091,9,0.043948695,turquoise,gene18803,uncharacterized protein LOC111132304
1899,gene1881,0.056035,0.061125,-2.093722,13.866577,-0.583064,4.901632,1.969184,0.160534,0.884593,7,0.574147692,green,gene1881,regulating synaptic membrane exocytosis protein 1-like isoform X1
1900,gene18823,0.125571,0.108636,-0.883475,36.503792,0.709521,3.107267,1.92809,0.164968,0.887086,2,0.392675305,turquoise,gene18823,retinoblastoma-like protein 1 isoform X1
1901,gene1883,0.715874,0.493784,-0.396868,10.329158,0.17342,5.917002,0.37106,0.542427,0.969301,9,0.211005572,blue,gene1883,uncharacterized protein LOC111100585 isoform X1
1902,gene18830,0.102051,0.094561,2.91879,26.019878,0.324413,5.36366,0.804449,0.369767,0.937803,8,0.590523143,turquoise,gene18830,uncharacterized protein LOC111132307
1903,gene18834,0.062013,0.071459,-1.398863,30.953676,-0.137727,3.383844,0.062834,0.802071,0.990872,3,0.322075416,purple,gene18834,uncharacterized protein C01G6.5-like isoform X1
1904,gene1884,0.196108,0.20353,-0.685429,50.5054,0.408971,6.407958,2.03165,0.154053,0.879035,9,0.547491506,yellow,gene1884,protein OS-9-like
1905,gene18842,0.727513,0.498108,0.252514,6.085147,-0.96962,5.82316,6.03064,0.01406,0.53586,8,0.370363283,blue,gene18842,"b(0,+)-type amino acid transporter 1-like isoform X1"
1906,gene18847,0.781846,0.519879,-0.037172,1.32554,-0.091949,7.666755,0.029076,0.864603,0.993796,10,0.347523934,black,gene18847,uncharacterized protein LOC111134695
1907,gene18865,0.012475,0.018885,-0.492341,18.325589,-0.221332,3.699489,0.121084,0.727862,0.986238,4,0.46628225,blue,gene18865,coiled-coil domain-containing protein 74A-like isoform X1
1908,gene18878,0.000346,0.000752,2.376865,6.503467,-0.962265,3.264141,1.992671,0.158062,0.883666,3,0.402800152,red,gene18878,phosphatidylinositol N-acetylglucosaminyltransferase subunit A-like isoform X1
1909,gene18888,0.003786,0.006981,-4.892006,65.464656,-0.4523,4.255026,0.778183,0.377697,0.939089,5,0.281516255,yellow,gene18888,protein NipSnap homolog 3A-like
1910,gene18889,0,0,31.340633,35.993229,-0.143413,4.982476,0.166286,0.683434,0.98412,7,0.667250907,red,gene18889,protein broad-minded-like isoform X1
1911,gene1889,0.110195,0.130147,-5.397477,41.944148,-0.098153,6.214898,0.187572,0.664945,0.982944,9,0.507381503,green,gene1889,INO80 complex subunit D-like
1912,gene18891,0.143197,0.159917,-0.800085,1.01095,-0.66895,3.646649,0.626644,0.428589,0.951656,4,0.601008923,turquoise,gene18891,cornifelin homolog
1913,gene18896,0,0,9.772271,18.199264,1.17776,4.766823,2.234445,0.134965,0.863321,6,0.46815217,green,gene18896,LOW QUALITY PROTEIN: GATOR complex protein WDR59-like
1914,gene18901,0,0,14.284382,71.470713,0.047592,7.619771,0.047949,0.826672,0.992241,10,0.570127627,green,gene18901,casein kinase II subunit alpha-like isoform X1
1915,gene18905,8.80E-05,0.000204,-3.414852,74.716983,0.233594,4.933937,0.26973,0.603513,0.978657,7,0.251063784,turquoise,gene18905,LOW QUALITY PROTEIN: uncharacterized protein LOC111132968
1916,gene18906,0.324716,0.293486,-0.920007,3.493461,-0.556476,6.053823,2.333072,0.126652,0.8592,9,0.480724385,yellow,gene18906,LOW QUALITY PROTEIN: 26S proteasome non-ATPase regulatory subunit 7-like
1917,gene18907,0.098208,0.111673,-0.539475,1.379378,-0.111761,4.253188,0.067382,0.795187,0.989963,5,0.654270355,purple,gene18907,cingulin-like protein 1
1918,gene18908,0.15791,0.131349,-0.209627,43.851816,-0.015446,6.676634,0.003314,0.954094,0.997184,9,0.486865196,green,gene18908,LOW QUALITY PROTEIN: zinc finger homeobox protein 4-like
1919,gene1891,0.293906,0.223019,0.694282,7.91053,0.080027,5.122028,0.048186,0.82625,0.992241,7,0.563274422,blue,gene1891,transcription initiation factor TFIID subunit 11-like
1920,gene18916,0.000102,0.000236,5.686973,69.675573,0.736084,3.955391,2.792615,0.0947,0.824371,4,0.356630352,black,gene18916,E3 ubiquitin-protein ligase RNF31-like
1921,gene18918,0.042291,0.059426,-1.848838,10.710862,-0.001581,5.389816,3.00E-06,0.998732,0.999953,8,0.15568683,black,gene18918,"cytochrome c oxidase subunit 4 isoform 1, mitochondrial-like"
1922,gene18926,0.935577,0.575227,-0.071707,1.727106,-0.116429,3.405666,0.057491,0.810506,0.991391,3,0.433122807,green,gene18926,fatty acid 2-hydroxylase-like isoform X1
1923,gene18932,0.465639,0.314411,2.155031,37.123596,0.236207,3.600493,0.112808,0.73697,0.987329,4,0.522662386,turquoise,gene18932,rotatin-like isoform X1
1924,gene18943,0,0,9.206689,68.093368,-0.319642,6.677325,0.825937,0.36345,0.93415,9,0.094018054,turquoise,gene18943,neuroguidin-like isoform X1
1925,gene18944,0.518476,0.392874,0.015921,5.211348,0.369551,4.026965,0.2181,0.640491,0.981108,5,0.550693924,turquoise,gene18944,short transient receptor potential channel 3-like isoform X1
1926,gene18968,0.515062,0.401502,0.255665,1.038195,0.510862,3.906109,0.899004,0.343049,0.93226,4,0.187960154,black,gene18968,cytoplasmic dynein 1 light intermediate chain 2-like isoform X1
1927,gene18986,0.042738,0.045766,-11.453719,47.050852,-0.207324,3.817292,0.266641,0.605594,0.978657,4,0.406254687,green,gene18986,merlin-like isoform X1
1928,gene18988,0.181255,0.138916,0.904986,17.772847,-0.561939,4.327285,2.153912,0.142207,0.865821,5,0.079972754,turquoise,gene18988,protein-tyrosine sulfotransferase 1-like
1929,gene18989,0.376734,0.266866,-0.688952,29.713453,0.231336,4.604147,0.163591,0.685871,0.98412,6,0.428559963,turquoise,gene18989,calcium/calmodulin-dependent protein kinase kinase 1-like isoform X1
1930,gene1899,0.153855,0.139585,-0.670951,1.254409,1.367194,6.894739,9.166705,0.002465,0.311448,10,0.563523843,turquoise,gene1899,multiple epidermal growth factor-like domains protein 6 isoform X1
1931,gene19002,0.571328,0.386424,-0.421815,13.880554,0.595521,4.580462,0.675451,0.411158,0.946349,6,0.197926081,green,gene19002,protein let-653-like
1932,gene1901,0.883375,0.557572,0.146386,6.305567,0.139624,5.084784,0.044482,0.832959,0.992241,7,0.84599632,turquoise,gene1901,multiple epidermal growth factor-like domains protein 10
1933,gene19027,0.013182,0.021433,-0.219323,3.041067,0.426567,4.433936,0.360209,0.54839,0.970301,6,0.837151061,turquoise,gene19027,glycine-rich cell wall structural protein 1-like isoform X19
1934,gene19028,0.429087,0.334533,0.128752,2.395923,-1.570935,5.193859,3.089449,0.078801,0.799972,7,0.094754853,turquoise,gene19028,spore coat protein SP96-like
1935,gene19037,0,0,14.017193,60.352808,0.977772,4.639662,2.135185,0.143953,0.870155,6,0.38253212,turquoise,gene19037,calcium/calmodulin-dependent protein kinase kinase 1-like isoform X1
1936,gene19049,0.377602,0.257147,-0.586586,2.336218,0.779251,5.559859,1.173928,0.278596,0.928733,8,0.779740169,turquoise,gene19049,uncharacterized protein LOC111133256
1937,gene19080,0.10944,0.098358,4.871645,11.303276,-0.153639,3.835018,0.065528,0.797963,0.990057,4,0.503967093,turquoise,gene19080,uncharacterized protein LOC111134927 isoform X1
1938,gene19082,0.245666,0.212255,0.832799,57.312622,-0.015697,7.442119,0.005231,0.942342,0.995637,10,0.44135038,green,gene19082,serine/threonine-protein kinase TAO1-like
1939,gene19085,0.016775,0.024839,2.805786,5.692995,-0.266709,5.975665,0.507919,0.476041,0.95729,9,0.537440195,turquoise,gene19085,uncharacterized protein LOC111135861 isoform X1
1940,gene19088,0,0,17.616938,26.625482,0.846965,4.369583,3.249599,0.071441,0.785145,6,0.547462921,green,gene19088,"high affinity cGMP-specific 3\',5\'-cyclic phosphodiesterase 9A-like isoform X1"
1941,gene1909,0.819012,0.534355,-0.380253,11.819846,-0.473768,3.958692,0.461481,0.496932,0.960259,4,0.328266122,greenyellow,gene1909,kelch domain-containing protein 10-like
1942,gene19094,0.430204,0.355996,0.96198,21.144656,0.149647,4.150948,0.086504,0.768669,0.987969,5,0.048981829,turquoise,gene19094,organic cation transporter protein-like
1943,gene19099,0.657142,0.468258,0.424156,11.855331,0.451962,4.260922,0.95108,0.329445,0.93226,5,0.289238228,red,gene19099,"delta-1-pyrroline-5-carboxylate dehydrogenase, mitochondrial-like"
1944,gene19101,0.158487,0.151448,-2.80149,37.239846,-0.244102,4.617355,0.264635,0.606953,0.978657,6,0.414442216,green,gene19101,calsyntenin-1-like
1945,gene19102,0,0,20.449737,40.575302,0.532375,4.123146,0.966105,0.325653,0.93226,5,0.577966305,green,gene19102,mitofusin-2-like isoform X1
1946,gene1911,0.763489,0.506748,0.065543,0.980337,-0.748595,6.676989,2.349645,0.125312,0.857499,9,0.58086122,turquoise,gene1911,von Willebrand factor D and EGF domain-containing protein-like isoform X1
1947,gene19110,0.014218,0.022987,-5.22791,9.264586,-0.312234,4.17334,0.561595,0.453618,0.956091,5,0.378582622,blue,gene19110,pre-mRNA-splicing factor SPF27-like
1948,gene19114,0.000252,0.000558,8.241365,79.307115,-0.766448,4.892054,2.00996,0.156269,0.882396,7,0.484813344,yellow,gene19114,calsyntenin-1-like
1949,gene19123,0,0,2.736615,4.231163,-0.544831,8.225592,4.149449,0.041648,0.699822,10,0.202495271,yellow,gene19123,cyclin-L1-like
1950,gene19125,0.29543,0.219209,-3.806884,41.596832,-0.227303,4.594055,0.169913,0.680189,0.983547,6,0.262976807,turquoise,gene19125,"phosphatidylinositol 4,5-bisphosphate 3-kinase catalytic subunit alpha isoform-like"
1951,gene19126,0.001783,0.003484,1.261168,1.816779,0.132849,4.029879,0.105561,0.745256,0.987969,5,0.321637327,turquoise,gene19126,filaggrin-like
1952,gene19130,0,0,0.494994,3.171415,0.562904,5.150145,2.449449,0.117566,0.849024,7,0.305163485,yellow,gene19130,uncharacterized protein LOC111132174
1953,gene19134,0.577841,0.432303,0.030784,0.609365,0.847393,3.867685,0.968474,0.325061,0.93226,4,0.386208123,blue,gene19134,glutathione S-transferase 1-like
1954,gene19137,6.70E-05,0.000159,4.716362,20.0214,-0.460308,6.380908,2.835515,0.092201,0.822875,9,0.319196522,yellow,gene19137,little elongation complex subunit 2-like isoform X1
1955,gene19141,0,0,-0.172463,36.935637,-0.539477,5.433235,1.144045,0.284799,0.928733,8,0.682321338,purple,gene19141,LOW QUALITY PROTEIN: uncharacterized protein LOC111135753
1956,gene19144,0.453726,0.369461,-0.507994,25.442689,-0.343221,4.651805,0.887133,0.346255,0.93226,6,0.292891264,turquoise,gene19144,forkhead box protein J3-like
1957,gene19146,0.391026,0.33367,0.879182,1.822914,-0.122751,6.566444,0.154268,0.69449,0.984331,9,0.238772527,blue,gene19146,DIS3-like exonuclease 2 isoform X1
1958,gene1915,0.497963,0.366447,0.073378,2.007891,-1.389409,4.510646,0.947761,0.33029,0.93226,6,0.196096927,brown,gene1915,complement C1q-like protein 2 isoform X1
1959,gene19150,0.129267,0.147818,-0.1039,0.229051,1.956242,3.387948,7.406344,0.006499,0.422923,3,0.771221652,pink,gene19150,uncharacterized protein LOC111135744
1960,gene19155,0.397222,0.264841,0.177127,0.477194,-0.274903,5.558531,0.657902,0.417301,0.949298,8,0.290407447,blue,gene19155,uncharacterized protein LOC111135754
1961,gene19159,0.018598,0.023893,-3.246509,30.497613,0.668405,3.910747,0.89097,0.345214,0.93226,4,0.72567488,turquoise,gene19159,uncharacterized protein LOC111135734
1962,gene19162,0,0,6.140163,74.061461,0.515137,3.404458,1.137203,0.286244,0.928733,3,0.232264465,turquoise,gene19162,origin recognition complex subunit 2-like
1963,gene19197,0.899943,0.562911,0.25426,10.466329,-0.429628,6.300768,2.508232,0.113253,0.840276,9,0.414492739,blue,gene19197,chromobox protein homolog 1-like
1964,gene19199,0.027859,0.031103,0.25195,27.323948,0.377397,4.934428,0.705246,0.401027,0.944652,7,0.552843383,turquoise,gene19199,CD109 antigen-like
1965,gene19208,0.519558,0.381255,-0.125032,1.864149,-0.354966,7.917168,1.445682,0.229222,0.915304,10,0.625413855,yellow,gene19208,UDP-glucuronic acid decarboxylase 1-like isoform X2
1966,gene19218,0.159467,0.173692,-0.85346,1.999492,-0.085961,8.06113,0.051511,0.820455,0.992241,10,0.691278832,green,gene19218,uncharacterized protein LOC111135484
1967,gene19225,0,0,3.081222,7.973398,0.162987,6.107209,0.135914,0.712377,0.98622,9,0.749421222,red,gene19225,serine/threonine-protein phosphatase 4 regulatory subunit 1-like isoform X1
1968,gene19228,0,0,-18.731782,46.901316,-0.285489,7.094643,0.502513,0.478398,0.958279,10,0.790495838,blue,gene19228,uncharacterized protein C5orf49 homolog isoform X1
1969,gene19229,0.080432,0.101136,-0.285648,0.334851,0.032275,6.091672,0.012809,0.909891,0.993796,9,0.387429902,blue,gene19229,uncharacterized protein LOC111136461 isoform X1
1970,gene19231,0.001892,0.003491,3.057157,47.402047,0.098503,7.966836,0.091915,0.761756,0.987969,10,0.857744996,purple,gene19231,LOW QUALITY PROTEIN: hydrocephalus-inducing protein homolog
1971,gene19232,0.569713,0.428462,0.383864,80.746074,0.498696,4.149043,0.347402,0.555587,0.973758,5,0.875439961,turquoise,gene19232,uncharacterized protein LOC111136477 isoform X1
1972,gene19233,0.768121,0.514685,0.076448,1.139029,-0.835099,3.927869,3.311294,0.068805,0.778037,4,0.393083049,turquoise,gene19233,uncharacterized protein LOC111132127
1973,gene19235,0,0,44.979545,17.958436,-0.285297,4.472405,0.643625,0.422401,0.950565,6,0.552349179,red,gene19235,nucleoside diphosphate-linked moiety X motif 6-like isoform X1
1974,gene19236,0,0,5.483098,70.894999,-0.52428,4.392188,1.831655,0.175932,0.891871,6,0.536090613,green,gene19236,uncharacterized protein LOC111133476
1975,gene19238,0.013995,0.022662,-0.609676,74.617983,-0.406271,4.422166,0.708426,0.399967,0.944652,6,0.480836472,yellow,gene19238,protein pelota-like
1976,gene19240,0.042453,0.052845,3.076083,42.790617,0.388825,7.367713,2.724321,0.09883,0.825168,10,0.698958813,green,gene19240,uncharacterized protein LOC111138233 isoform X1
1977,gene19243,0.824791,0.53633,-0.409503,78.301967,0.05826,5.814351,0.037754,0.845937,0.992241,8,0.620741729,yellow,gene19243,rab5 GDP/GTP exchange factor-like isoform X1
1978,gene19251,0,0,1.286139,3.338122,1.236988,3.889515,3.204936,0.073416,0.786946,4,0.385400829,green,gene19251,uncharacterized protein LOC111133548
1979,gene1926,0.242704,0.197555,0.469203,1.560732,-0.440623,4.604608,0.24973,0.617265,0.978657,6,0.868351184,turquoise,gene1926,uncharacterized protein LOC111138113
1980,gene19260,0.221234,0.181474,3.629126,16.448787,0.531989,5.637814,2.181746,0.139656,0.86433,8,0.637590431,green,gene19260,uncharacterized protein LOC111133364 isoform X1
1981,gene19264,0.669865,0.473939,-0.363303,4.57416,0.686548,5.529684,3.197077,0.07377,0.78743,8,0.305579901,turquoise,gene19264,NAD kinase-like isoform X5
1982,gene19270,0.001404,0.002589,-2.284498,34.873124,-0.563013,4.837776,1.079987,0.298701,0.931462,7,0.616009974,turquoise,gene19270,nucleolar complex protein 2 homolog
1983,gene19273,0.009013,0.014614,1.640718,64.860245,0.158972,4.19811,0.143523,0.704804,0.985225,5,0.251454839,red,gene19273,ubiquitin conjugation factor E4 B-like
1984,gene19275,0,0,34.592989,50.02772,0.362484,8.04742,1.293298,0.255441,0.921701,10,0.765399726,yellow,gene19275,uncharacterized protein LOC111132341
1985,gene19276,0.206558,0.155579,2.761588,24.441542,-0.221741,5.704387,0.625197,0.429123,0.951764,8,0.526500886,turquoise,gene19276,"arf-GAP with coiled-coil, ANK repeat and PH domain-containing protein 2-like isoform X1"
1986,gene19278,0.027125,0.037975,3.61251,15.940781,0.019318,4.739337,0.002979,0.95647,0.997184,6,0.496345957,red,gene19278,uncharacterized protein LOC111135180
1987,gene19280,0.002186,0.003731,-4.274745,15.164794,-0.154232,6.665463,0.43288,0.510579,0.964299,9,0.501346646,red,gene19280,uncharacterized protein LOC111133485
1988,gene19282,2.00E-06,6.00E-06,6.499947,80.908768,0.043508,3.568618,0.006838,0.934097,0.994005,3,0.36819641,turquoise,gene19282,protein kinase C iota type-like isoform X1
1989,gene19283,0.058532,0.077957,-2.889509,68.101247,0.066659,7.499115,0.060569,0.805598,0.991016,10,0.245607567,black,gene19283,F-actin-capping protein subunit beta-like
1990,gene19286,0.873111,0.554105,0.019385,0.443917,0.218709,3.25918,0.145773,0.702608,0.985024,3,0.338946274,turquoise,gene19286,uncharacterized protein LOC111132344
1991,gene19297,0.38049,0.255966,-1.362457,21.30789,-0.093963,5.792092,0.08483,0.770856,0.987969,8,0.791345966,blue,gene19297,forkhead-associated domain-containing protein 1-like isoform X1
1992,gene19303,0.317331,0.193536,-9.461716,69.789675,-0.963869,4.39649,1.64645,0.199443,0.90158,6,0.391905767,turquoise,gene19303,uncharacterized protein LOC111137058
1993,gene19305,0.163786,0.177156,-1.516939,6.865438,-0.395623,3.887743,0.612391,0.433889,0.953042,4,0.176523994,turquoise,gene19305,Fanconi anemia core complex-associated protein 20-like isoform X3
1994,gene1931,0.251438,0.194855,0.050347,1.89539,0.092464,4.220999,0.006052,0.937993,0.994931,5,0.426304552,turquoise,gene1931,uncharacterized protein LOC111138099
1995,gene19312,0,0,7.038045,61.145499,-0.144724,6.473139,0.117664,0.731582,0.986801,9,0.86756386,turquoise,gene19312,carboxypeptidase D-like
1996,gene19313,0.303461,0.232783,-0.001505,5.192624,-0.15478,5.685262,0.277575,0.598295,0.978657,8,0.074829272,turquoise,gene19313,MLX-interacting protein-like isoform X1
1997,gene19314,0.215185,0.218395,1.378437,81.411948,-0.219847,5.016499,0.262276,0.608561,0.978657,7,0.481158325,pink,gene19314,transducin beta-like protein 2
1998,gene19316,1.90E-05,4.80E-05,10.612541,50.040204,-0.219344,6.041886,0.299919,0.583933,0.977018,9,0.745043982,blue,gene19316,serine/threonine/tyrosine-interacting-like protein 1
1999,gene19320,0.00416,0.007606,0.087119,1.004058,-1.00444,4.284233,2.941043,0.086355,0.814114,5,0.430831133,red,gene19320,NACHT and WD repeat domain-containing protein 2-like
2000,gene19325,0,0,-7.642815,77.201736,-0.303916,4.255203,0.767905,0.380866,0.939186,5,0.206956797,turquoise,gene19325,bicaudal D-related protein homolog isoform X1
2001,gene19336,0,0,7.703393,38.260566,-0.560435,3.898446,1.056632,0.303985,0.93226,4,0.312651781,blue,gene19336,spermidine synthase-like
2002,gene19339,0,0,-11.543977,38.995229,-0.076992,5.821771,0.022026,0.882017,0.993796,8,0.523018904,pink,gene19339,fructose-bisphosphate aldolase-like
2003,gene19350,0.005694,0.009955,-0.370141,29.460983,-0.230995,7.28593,1.261038,0.261455,0.925081,10,0.627745561,green,gene19350,LOW QUALITY PROTEIN: ski oncogene-like
2004,gene19365,0.446731,0.365377,0.062173,0.11546,0.602399,4.561647,1.983487,0.159024,0.884593,6,0.085738119,red,gene19365,fatty acid-binding protein 9-like
2005,gene19368,0.676376,0.467024,-0.236308,4.015994,-1.21685,7.930684,1.36475,0.242716,0.920192,10,0.149217173,red,gene19368,protein transport protein SEC9-like
2006,gene19392,0.710877,0.484266,0.166192,25.532204,-0.730688,5.695375,4.901161,0.026839,0.62973,8,0.278467728,red,gene19392,protein piccolo-like isoform X1
2007,gene19393,0.324086,0.293082,0.045639,0.281249,-0.957596,4.374255,4.147846,0.041688,0.699822,6,0.255381096,turquoise,gene19393,LOW QUALITY PROTEIN: myosin-11-like
2008,gene19395,0.704481,0.489053,-0.108569,2.729452,-1.172054,3.328749,3.309403,0.068885,0.778037,3,0.245587908,blue,gene19395,uncharacterized protein LOC111136339
2009,gene19403,0.06416,0.083985,-0.841042,0.980859,0.437369,3.902918,0.246094,0.619839,0.978944,4,0.356847677,pink,gene19403,uncharacterized protein LOC111136345
2010,gene19407,0.09303,0.105826,-0.772428,0.542403,0.255295,3.268594,0.092739,0.760724,0.987969,3,0.325298157,yellow,gene19407,"fatty acid-binding protein, adipocyte-like"
2011,gene19418,0,0,-4.302654,16.557388,0.666789,3.71872,1.682344,0.194613,0.89842,4,0.894307282,black,gene19418,uncharacterized protein LOC111136190
2012,gene19427,0.394082,0.335253,-0.132193,0.439115,0.203395,4.730316,0.10779,0.742674,0.987969,6,0.778343295,red,gene19427,uncharacterized protein LOC111134928 isoform X1
2013,gene19428,0.130532,0.125616,6.928978,20.834865,-0.491052,6.264656,2.609032,0.106257,0.83528,9,0.556510487,turquoise,gene19428,trichohyalin-like isoform X1
2014,gene19432,2.70E-05,6.60E-05,-4.42485,77.460323,0.338084,7.349896,1.825803,0.176624,0.892094,10,0.42032889,red,gene19432,AP-1 complex subunit beta-1-like
2015,gene19436,0,0,6.988965,69.168799,-0.368425,4.189743,0.704665,0.401221,0.944652,5,0.600197691,yellow,gene19436,N-lysine methyltransferase KMT5A-like isoform X1
2016,gene19437,0,0,-3.016551,83.954637,-0.031843,3.90813,0.003339,0.953921,0.997184,4,0.661980515,yellow,gene19437,protein phosphatase PTC7 homolog
2017,gene19438,0.685132,0.480773,-0.161819,1.344899,0.368354,3.431863,0.426565,0.513679,0.964536,3,0.238267063,turquoise,gene19438,cell cycle checkpoint control protein RAD9A-like
2018,gene1944,0.486522,0.329838,0.654282,20.65794,0.094438,3.501491,0.010818,0.917161,0.993796,3,0.432237859,grey,gene1944,uncharacterized protein LOC111120589 isoform X1
2019,gene19446,0.052457,0.057323,6.067299,23.603661,-0.186006,7.819668,0.582466,0.445348,0.955234,10,0.429648105,blue,gene19446,serine/arginine repetitive matrix protein 2-like
2020,gene19450,0,0,-8.728851,9.425211,-0.479616,5.021229,0.79109,0.373771,0.938859,7,0.341790815,red,gene19450,transmembrane emp24 domain-containing protein 2-like
2021,gene19459,0.02143,0.028978,-1.382432,32.535109,0.264862,3.359227,0.278582,0.597632,0.978657,3,0.276455417,turquoise,gene19459,RING finger protein 215-like
2022,gene19466,0.413892,0.267703,1.121673,39.511254,0.084239,4.104187,0.047039,0.828299,0.992241,5,0.395596567,turquoise,gene19466,serine-protein kinase ATM-like
2023,gene1947,0.062609,0.082363,-1.54594,5.581808,-0.796162,3.605323,1.032469,0.309579,0.93226,4,0.305997657,blue,gene1947,probable methyltransferase-like protein 15 homolog isoform X1
2024,gene19487,0.006158,0.01088,6.346064,31.969553,0.804994,4.132244,1.406688,0.235607,0.916485,5,0.497710736,turquoise,gene19487,uncharacterized protein LOC111134145 isoform X1
2025,gene19488,0.421572,0.351059,-0.669252,5.181827,-0.118469,6.093345,0.162067,0.687261,0.98412,9,0.821963869,turquoise,gene19488,polyhomeotic-like protein 1 isoform X1
2026,gene19496,0.546919,0.377131,0.518033,74.240388,-0.286304,7.813523,1.595686,0.206516,0.90532,10,0.628969055,purple,gene19496,nuclear factor of activated T-cells 5-like isoform X1
2027,gene19507,0.219431,0.180506,0.213942,0.764353,-0.012104,3.364712,0.000672,0.979325,0.998341,3,0.136111145,turquoise,gene19507,"steroid 17-alpha-hydroxylase/17,20 lyase-like isoform X1"
2028,gene19509,0.017245,0.02493,6.101363,23.353216,-0.133939,8.339222,0.195224,0.658604,0.982155,10,0.927663954,blue,gene19509,growth arrest-specific protein 8-like
2029,gene19511,0,0,-16.349317,55.783325,-0.557786,3.732264,0.68251,0.408724,0.945639,4,0.420506254,yellow,gene19511,"pyruvate dehydrogenase phosphatase regulatory subunit, mitochondrial-like"
2030,gene19520,0.078401,0.089285,-0.6125,10.325191,-1.28384,4.196023,1.202509,0.272821,0.928733,5,0.331974164,turquoise,gene19520,sodium- and chloride-dependent glycine transporter 1-like
2031,gene19521,0.023305,0.031508,0.157392,0.877065,-0.48088,5.72195,0.714668,0.397899,0.944148,8,0.407763961,turquoise,gene19521,sodium- and chloride-dependent glycine transporter 1-like isoform X1
2032,gene19522,0.498472,0.392823,0.040739,0.465757,-0.005826,4.264517,1.00E-04,0.992018,0.999244,5,0.354113069,turquoise,gene19522,sodium- and chloride-dependent glycine transporter 1-like isoform X1
2033,gene19526,0,0,-11.546322,69.900835,-0.088305,7.550795,0.078293,0.779624,0.988065,10,0.702890651,brown,gene19526,small nuclear ribonucleoprotein-associated protein B-like
2034,gene19528,0,0,8.088285,84.385773,0.073135,8.28215,0.053196,0.817593,0.992241,10,0.846939917,blue,gene19528,dynein light chain roadblock-type 2 isoform X1
2035,gene19529,0.718128,0.49455,0.502727,8.365316,0.046735,7.17177,0.020602,0.885868,0.993796,10,0.5304461,turquoise,gene19529,"dynein heavy chain 5, axonemal-like isoform X1"
2036,gene19531,0.468925,0.300608,-1.675718,26.767916,-0.454584,5.369856,0.615442,0.432746,0.952697,8,0.907361015,turquoise,gene19531,probable ATP-dependent RNA helicase DHX35
2037,gene19540,0.554855,0.421668,-0.136154,0.508278,-0.019957,4.767394,0.001569,0.968404,0.998341,6,0.74618101,turquoise,gene19540,lactase-phlorizin hydrolase-like
2038,gene19560,0.004873,0.00879,-0.365135,0.68389,-0.597573,5.419388,1.925796,0.165219,0.887086,8,0.113304727,turquoise,gene19560,protein CASP-like
2039,gene19561,0.156169,0.130826,0.536842,38.093485,-0.05471,7.943919,0.062642,0.802368,0.990893,10,0.65811559,green,gene19561,homeobox protein cut-like 1 isoform X1
2040,gene19562,0.011991,0.018199,-1.276855,56.664974,-0.718056,4.926365,2.772375,0.095904,0.825168,7,0.529247873,turquoise,gene19562,nuclear pore complex protein Nup88-like
2041,gene19576,0.112917,0.119682,-3.144199,16.348104,0.086129,6.65145,0.064271,0.799868,0.990433,9,0.660429012,turquoise,gene19576,pleckstrin homology domain-containing family G member 5-like isoform X1
2042,gene19584,0.20693,0.212054,1.13729,8.072022,-0.167986,3.447044,0.036398,0.848697,0.992473,3,0.537022608,turquoise,gene19584,uncharacterized protein LOC111133139 isoform X1
2043,gene19589,0.642426,0.46183,0.078095,1.013983,0.502439,4.310416,1.228704,0.267659,0.926133,5,0.365202116,blue,gene19589,NACHT and WD repeat domain-containing protein 2-like isoform X1
2044,gene19591,0.840344,0.541862,0.189232,3.788136,1.213004,7.341339,18.115605,2.10E-05,0.021326,10,0.649298917,pink,gene19591,coronin-1B-like isoform X1
2045,gene19592,0.188282,0.197162,0.090894,0.287074,0.329128,4.794407,0.31745,0.573144,0.976289,7,0.793405274,blue,gene19592,uncharacterized protein LOC111134453 isoform X1
2046,gene19593,0.010428,0.016142,13.318132,16.1056,0.217832,4.038747,0.203606,0.651826,0.981108,5,0.480673331,brown,gene19593,GMP synthase
2047,gene19596,0.902988,0.564149,-0.007485,0.475283,0.3707,4.357035,0.478744,0.488992,0.959339,5,0.221335887,black,gene19596,uncharacterized protein LOC111138405
2048,gene19604,0.842168,0.542385,0.453,23.539816,0.108882,4.559127,0.076437,0.782185,0.988497,6,0.253858288,magenta,gene19604,importin subunit alpha-2-like
2049,gene19608,0.132138,0.150345,3.468608,51.426159,0.141822,6.793536,0.157589,0.691386,0.98412,10,0.883004096,turquoise,gene19608,serine/arginine repetitive matrix protein 2-like isoform X1
2050,gene1961,0.151873,0.122932,1.085085,34.533593,0.528114,4.303173,0.73717,0.390569,0.940946,5,0.394319581,blue,gene1961,cullin-associated NEDD8-dissociated protein 1-like
2051,gene1962,0,0,16.191761,36.370394,0.129151,6.961434,0.29061,0.58983,0.978657,10,0.479686268,turquoise,gene1962,E3 ubiquitin-protein ligase RNF19A-like
2052,gene19626,0.30487,0.258282,-0.96582,55.84054,0.156267,5.903575,0.258116,0.611417,0.978657,9,0.489671319,red,gene19626,"procollagen-lysine,2-oxoglutarate 5-dioxygenase 3-like"
2053,gene19641,0.718127,0.49455,-0.728218,41.752559,-0.142101,4.295422,0.115902,0.733522,0.986959,5,0.398701815,yellow,gene19641,short transient receptor potential channel 4-associated protein-like isoform X1
2054,gene19649,0,0,9.037931,53.441678,-0.210234,6.864776,0.453262,0.50079,0.960381,10,0.745945948,turquoise,gene19649,uncharacterized protein LOC111137876
2055,gene19660,0.249963,0.174855,-7.105356,8.257718,-0.847681,3.647143,1.114787,0.291044,0.930457,4,0.276894115,turquoise,gene19660,uncharacterized protein LOC111136309 isoform X1
2056,gene1968,0.090009,0.110618,0.1586,0.412198,-0.406875,3.889989,0.829302,0.362474,0.933235,4,0.141156385,turquoise,gene1968,uncharacterized protein LOC111113554 isoform X1
2057,gene19697,0.21444,0.21788,-0.549243,0.995823,-1.016817,4.778945,1.798796,0.179858,0.893782,6,0.060347537,turquoise,gene19697,cathepsin L-like isoform X1
2058,gene19700,0.003307,0.006169,0.378194,2.164698,0.430449,4.154519,0.17588,0.674938,0.983547,5,0.883859995,turquoise,gene19700,metal tolerance protein 9-like
2059,gene19702,0.035685,0.051344,1.311858,1.556488,-0.335165,5.823694,0.967317,0.32535,0.93226,8,0.31767608,blue,gene19702,ubiquitin-conjugating enzyme E2 J2-like
2060,gene19706,0.02895,0.042802,-0.242585,4.415062,0.239633,6.066169,0.454142,0.500374,0.960259,9,0.229520187,turquoise,gene19706,tumor protein p53-inducible nuclear protein 1-like
2061,gene19724,0.08847,0.109167,0.650248,0.735148,-1.237773,3.561526,3.364637,0.06661,0.775963,3,0.152054117,turquoise,gene19724,uncharacterized protein LOC111133660
2062,gene19730,0.068779,0.088972,-0.642646,4.146858,0.501443,3.339156,0.52065,0.470564,0.956091,3,0.692011736,turquoise,gene19730,multiple epidermal growth factor-like domains protein 10 isoform X2
2063,gene19733,0.13169,0.149753,0.186018,0.330495,0.115672,3.798124,0.046547,0.829185,0.992241,4,0.249205572,black,gene19733,uncharacterized protein LOC111136837 isoform X1
2064,gene19737,0.378197,0.325188,0.090438,1.252176,1.148588,4.736284,1.024505,0.311453,0.93226,6,0.558308328,turquoise,gene19737,ATP-dependent DNA helicase RecQ-like isoform X1
2065,gene19738,0.350311,0.309655,1.268927,80.138234,0.01667,5.253426,0.000595,0.980541,0.998474,8,0.28888719,turquoise,gene19738,deoxynucleoside triphosphate triphosphohydrolase SAMHD1-like isoform X1
2066,gene19745,0.003736,0.0069,-4.700198,8.446485,-0.410601,3.837404,0.191208,0.661913,0.982539,4,0.648063077,turquoise,gene19745,uncharacterized protein LOC111132887
2067,gene19746,0.265284,0.204681,-2.298171,10.585236,0.024587,7.393154,0.009279,0.92326,0.993796,10,0.332125872,brown,gene19746,hemocyte protein-glutamine gamma-glutamyltransferase-like isoform X1
2068,gene19749,0.665378,0.471823,0.899146,7.431292,-0.242111,5.756156,0.720075,0.396119,0.943422,8,0.476162825,green,gene19749,uncharacterized protein LOC111135240 isoform X1
2069,gene19753,0.009607,0.015009,6.805256,40.172736,0.277951,4.117335,0.377207,0.539102,0.96884,5,0.456389877,blue,gene19753,dnaJ homolog subfamily C member 11-like
2070,gene19755,0.188951,0.17156,-1.034197,25.875726,0.594083,4.44475,2.88705,0.089294,0.818998,6,0.174634338,turquoise,gene19755,serine/threonine-protein kinase mTOR-like
2071,gene19757,0.406235,0.325145,-0.738821,2.610164,-0.566013,3.554594,1.275763,0.258688,0.92492,3,0.353206511,turquoise,gene19757,mitochondrial ribonuclease P protein 3-like
2072,gene19759,0.1619,0.16168,0.397048,0.53374,-0.386107,6.667262,0.845944,0.357702,0.93226,9,0.656627118,blue,gene19759,uncharacterized protein LOC111136326 isoform X1
2073,gene19770,7.00E-06,1.70E-05,1.897723,78.913815,0.410278,4.118082,1.009691,0.314977,0.93226,5,0.201595284,black,gene19770,phosphatidylinositol glycan anchor biosynthesis class U protein-like
2074,gene19771,0,1.00E-06,4.053402,72.648026,0.496354,3.439432,0.897739,0.343389,0.93226,3,0.401677916,brown,gene19771,tRNA-dihydrouridine(20) synthase
2075,gene19773,0.121165,0.09177,-1.34377,51.25225,-0.13139,4.849406,0.141812,0.706486,0.985478,7,0.278987021,brown,gene19773,nuclear pore complex protein Nup93-like isoform X1
2076,gene19775,0,0,9.349408,24.164009,-0.33636,6.373182,1.897817,0.168323,0.888303,9,0.712705934,green,gene19775,ankyrin repeat domain-containing protein 12-like isoform X1
2077,gene19778,0.148663,0.109719,0.974335,41.206364,-0.185,4.534771,0.206571,0.649469,0.981108,6,0.632326269,turquoise,gene19778,H(+)/Cl(-) exchange transporter 7-like isoform X1
2078,gene19779,0.143801,0.097719,1.438003,45.237003,0.028174,7.321289,0.017663,0.894271,0.993796,10,0.467197902,green,gene19779,guanine nucleotide-binding protein G(s) subunit alpha-like
2079,gene1978,0.298802,0.222069,0.241502,0.802366,0.332679,3.893563,0.385451,0.534701,0.967596,4,0.334444485,yellow,gene1978,17-beta-hydroxysteroid dehydrogenase 14-like
2080,gene19780,0.00022,0.000471,1.205575,70.431812,-0.080648,6.789102,0.094491,0.758544,0.987969,10,0.853735513,purple,gene19780,protein fantom-like isoform X1
2081,gene19781,0.253886,0.208045,1.238398,25.188706,1.288704,3.883391,2.853783,0.091159,0.818998,4,0.512005407,turquoise,gene19781,ceramide kinase-like isoform X1
2082,gene19790,0.082693,0.087108,-1.569073,51.516168,0.249884,5.48394,0.821775,0.364662,0.935747,8,0.677097192,red,gene19790,chloride channel protein B-like isoform X1
2083,gene19795,0,1.00E-06,-8.574649,12.481833,-0.443595,6.775748,0.32967,0.565854,0.975073,10,0.231413373,blue,gene19795,sterile alpha motif domain-containing protein 9-like
2084,gene19808,0.00494,0.007587,0.027794,42.445113,-0.205643,4.596569,0.245588,0.620199,0.978944,6,0.102360784,turquoise,gene19808,ganglioside-induced differentiation-associated protein 1-like
2085,gene1981,0,0,-1.527585,86.126994,-0.304634,4.954048,0.918206,0.337946,0.93226,7,0.27459984,turquoise,gene1981,NGFI-A-binding protein 1-like isoform X1
2086,gene19817,0.090451,0.074967,-0.901553,26.428506,-0.20606,4.596869,0.080117,0.777139,0.987969,6,0.795545819,turquoise,gene19817,lymphoid-specific helicase-like isoform X1
2087,gene19820,0.147644,0.139933,1.508796,31.206914,0.162197,3.978024,0.071714,0.788858,0.989195,5,0.151761408,turquoise,gene19820,dual specificity protein phosphatase 22-like
2088,gene19821,0.467772,0.310014,0.014268,0.545898,0.014684,5.545184,0.00118,0.972593,0.998341,8,0.235643118,green,gene19821,uncharacterized protein LOC111134409 isoform X1
2089,gene19823,0.008217,0.014095,2.690499,4.107984,0.337834,6.669649,3.205743,0.07338,0.786946,9,0.697170276,green,gene19823,tyrosine-protein phosphatase non-receptor type 2-like
2090,gene19826,0.218368,0.179057,-5.462779,35.846948,0.208945,5.690574,0.530288,0.466486,0.956091,8,0.425836084,pink,gene19826,protein UBASH3A homolog
2091,gene1983,0,0,-5.80242,80.159252,-0.028052,6.75288,0.009265,0.92332,0.993796,10,0.64614161,green,gene1983,"arf-GAP with GTPase, ANK repeat and PH domain-containing protein 1-like isoform X12"
2092,gene19836,0.30887,0.259904,0.041396,0.925513,-0.253764,4.77065,0.303565,0.581656,0.977018,6,0.583066724,green,gene19836,"b(0,+)-type amino acid transporter 1-like isoform X1"
2093,gene19837,0.139124,0.155161,0.344987,65.219875,0.29359,5.226261,0.542441,0.461423,0.956091,7,0.611249925,turquoise,gene19837,poly
2094,gene19840,0.505238,0.322762,0.189482,2.8856,0.941791,5.002733,4.782321,0.028753,0.647842,7,0.352510965,turquoise,gene19840,D-aspartate oxidase-like
2095,gene19853,0.011567,0.01914,-2.911189,7.576364,-0.172372,4.852114,0.143629,0.7047,0.985225,7,0.522967778,brown,gene19853,mitotic spindle-associated MMXD complex subunit MIP18-like
2096,gene19858,0.284828,0.210314,-0.597417,5.780149,0.170368,6.111904,0.017416,0.895007,0.993796,9,0.299032314,turquoise,gene19858,uncharacterized protein LOC111135768 isoform X1
2097,gene19861,0.029363,0.039084,-6.2263,24.575191,0.342016,5.529774,0.65311,0.419003,0.949529,8,0.600600722,green,gene19861,breast cancer anti-estrogen resistance protein 1-like isoform X1
2098,gene19862,0.602826,0.44392,0.683331,10.775554,0.300783,4.690373,0.255536,0.613204,0.978657,6,0.764364202,turquoise,gene19862,glutathione synthetase-like
2099,gene19869,0.137322,0.115179,-5.189844,44.465331,0.079729,5.721101,0.010828,0.917123,0.993796,8,0.635532444,yellow,gene19869,"heterogeneous nuclear ribonucleoprotein A1, A2/B1 homolog isoform X1"
2100,gene19871,0.018131,0.028488,-0.707773,2.044997,1.134471,4.077868,3.855191,0.049592,0.732911,5,0.55824453,pink,gene19871,glycosyltransferase family 92 protein F13G3.3-like isoform X1
2101,gene19872,0.178789,0.131586,-0.525617,2.112644,-0.548344,5.912455,3.589208,0.058156,0.757556,9,0.245759469,turquoise,gene19872,uncharacterized protein LOC111134230 isoform X1
2102,gene19875,0.200907,0.17266,-1.074499,13.42256,-0.280392,7.64032,1.037971,0.308294,0.93226,10,0.465238014,blue,gene19875,LINE-1 reverse transcriptase homolog (EC 2.7.7.49)
2103,gene19884,0.177287,0.136043,-2.880374,24.049395,0.563402,5.167375,0.792329,0.373397,0.938627,7,0.864822889,turquoise,gene19884,calmodulin-binding transcription activator 1-like isoform X1
2104,gene19891,0.443195,0.363364,-0.657413,21.88587,-0.060897,6.462247,0.023336,0.878586,0.993796,9,0.676340027,blue,gene19891,MORN repeat-containing protein 3-like
2105,gene19892,4.20E-05,9.70E-05,3.334459,44.27523,-0.136829,5.774111,0.281706,0.595586,0.978657,8,0.364098684,yellow,gene19892,lysine-specific demethylase 2A-like
2106,gene19897,0.001768,0.003187,4.16688,20.638321,-0.63371,5.605467,2.345308,0.125661,0.858026,8,0.740471485,turquoise,gene19897,leucine-rich repeat-containing protein 74A-like isoform X1
2107,gene19903,0.228271,0.154984,-4.864759,55.034143,0.298662,4.702248,0.728353,0.393417,0.941854,6,0.429049927,turquoise,gene19903,DNA replication licensing factor mcm4-A-like isoform X1
2108,gene19905,0.254409,0.199029,6.298922,29.975085,-0.288536,4.002172,0.433868,0.510097,0.964299,5,0.144200746,turquoise,gene19905,mediator of RNA polymerase II transcription subunit 24-like isoform X1
2109,gene19915,0.375157,0.253686,2.261103,7.640732,-1.177265,4.246081,3.30597,0.069029,0.778037,5,0.506627235,turquoise,gene19915,deoxynucleoside triphosphate triphosphohydrolase SAMHD1-like
2110,gene1992,0.183897,0.114003,1.553529,14.300186,-0.818404,5.87374,2.08294,0.148953,0.876049,9,0.697457867,turquoise,gene1992,uncharacterized protein LOC111128436 isoform X1
2111,gene19922,0.539848,0.414308,-0.454589,9.361698,0.448982,4.540371,0.780302,0.377049,0.939089,6,0.594052942,turquoise,gene19922,citron Rho-interacting kinase-like
2112,gene19924,0.073862,0.081963,4.034446,25.370753,-0.212772,4.669254,0.139025,0.709253,0.98555,6,0.299854847,blue,gene19924,uncharacterized protein LOC111136713
2113,gene19927,0.38968,0.259758,1.356135,52.632426,-0.467904,5.659054,2.458732,0.116873,0.847813,8,0.414954421,purple,gene19927,palmitoyltransferase ZDHHC5-like isoform X2
2114,gene19933,0.256339,0.248041,0.346778,0.457372,1.170184,3.980521,2.21446,0.136723,0.863321,5,0.381396014,turquoise,gene19933,apolipoprotein L3-like
2115,gene19942,2.00E-06,7.00E-06,4.369112,3.816151,-0.398632,4.751705,1.043392,0.307034,0.93226,6,-0.081645733,turquoise,gene19942,bifunctional polynucleotide phosphatase/kinase-like
2116,gene19943,0.636959,0.459691,0.011714,0.292621,0.041975,3.466907,0.005703,0.939805,0.995158,3,-0.020366077,turquoise,gene19943,zinc transporter ZIP1-like
2117,gene19944,0.093734,0.090547,0.042368,0.486807,-0.772566,4.268259,3.129755,0.076875,0.792333,5,0.09765832,turquoise,gene19944,zinc finger protein ZFPM1-like isoform X1
2118,gene19945,0,0,12.723093,62.885269,-0.240965,4.005544,0.311221,0.576932,0.976334,5,0.197612144,red,gene19945,KDEL motif-containing protein 1-like
2119,gene19948,0.282618,0.265974,-0.76493,0.868329,-0.392637,4.44358,0.781073,0.376813,0.939089,6,0.358752245,blue,gene19948,RING finger protein 166-like
2120,gene19950,0.276431,0.258193,0.303748,0.847203,-2.026937,3.629329,10.630651,0.001112,0.230499,4,0.447328484,turquoise,gene19950,"b(0,+)-type amino acid transporter 1-like isoform X1"
2121,gene19951,0.388569,0.259271,0.121833,1.017039,-0.369382,5.409094,0.454352,0.500275,0.960259,8,0.842466496,turquoise,gene19951,protein-glutamine gamma-glutamyltransferase K-like isoform X1
2122,gene19952,0,0,8.779648,21.080479,0.598657,3.401993,0.825323,0.363628,0.93427,3,0.21561366,turquoise,gene19952,uncharacterized protein LOC111137806
2123,gene19961,0.254187,0.199936,6.749726,22.902296,0.389052,5.412197,1.613268,0.204033,0.904123,8,0.435757444,red,gene19961,"alanine--tRNA ligase, cytoplasmic-like"
2124,gene19962,6.00E-06,1.60E-05,1.72124,74.482336,-0.338508,5.688777,1.006572,0.315726,0.93226,8,0.67336655,blue,gene19962,"leucine-, glutamate- and lysine-rich protein 1-like"
2125,gene19963,0.22512,0.204527,1.994771,15.531381,-0.065611,5.597286,0.037653,0.846141,0.992241,8,0.626521433,blue,gene19963,uncharacterized protein LOC111138365 isoform X1
2126,gene19965,0.303105,0.208664,4.938474,31.34243,-0.101625,4.045853,0.01431,0.904782,0.993796,5,0.902477649,turquoise,gene19965,uncharacterized protein LOC111135008 isoform X1
2127,gene19966,0.319821,0.230329,2.661247,29.346127,-0.337343,4.629157,0.835824,0.360594,0.932443,6,0.320529105,turquoise,gene19966,eukaryotic translation initiation factor 2-alpha kinase 1-like isoform X1
2128,gene19968,0.017379,0.023411,-0.399946,10.591785,-0.257213,5.817914,0.565271,0.452144,0.956091,8,0.261588741,turquoise,gene19968,transcription factor 25-like
2129,gene19974,0.184025,0.127292,0.639789,33.471499,0.031486,6.802374,0.007503,0.930973,0.993796,10,0.60720741,turquoise,gene19974,basement membrane-specific heparan sulfate proteoglycan core protein-like isoform X1
2130,gene19979,0.505172,0.37371,-0.633714,4.725402,-0.059199,8.484147,0.09479,0.758173,0.987969,10,0.617576276,yellow,gene19979,protein LSM14 homolog A-A-like isoform X3
2131,gene19980,0,0,-9.67429,80.655799,-0.005531,5.786018,0.000298,0.98623,0.999244,8,-0.027778292,turquoise,gene19980,BTB/POZ domain-containing adapter for CUL3-mediated RhoA degradation protein 3-like
2132,gene19992,0,0,-10.290278,59.421358,0.594946,4.928873,1.987794,0.158572,0.884593,7,0.608472702,yellow,gene19992,uncharacterized protein LOC111136128
2133,gene19996,0,0,18.009967,45.215521,0.129979,4.076362,0.056068,0.812821,0.991951,5,-0.031540512,turquoise,gene19996,protein DGCR14-like
2134,gene200,1.90E-05,4.70E-05,-4.714491,4.549473,-0.851812,3.171395,1.322746,0.2501,0.921675,2,0.343183324,greenyellow,gene200,ubiquitin-conjugating enzyme E2 Z-like
2135,gene20000,0.143564,0.119009,-0.467685,47.161428,0.472029,4.208681,0.757614,0.384076,0.93925,5,0.20558904,black,gene20000,SEC14-like protein 2 isoform X1
2136,gene20003,0.763166,0.512662,-0.317217,9.94977,0.111674,3.720119,0.038047,0.845348,0.992241,4,0.599948153,black,gene20003,uncharacterized protein LOC111136129 isoform X1
2137,gene20004,0.042378,0.05277,0.578793,20.314752,0.10662,6.23573,0.134746,0.713561,0.98622,9,0.559336349,yellow,gene20004,uncharacterized protein LOC111132418
2138,gene20006,3.30E-05,8.10E-05,-9.514431,59.248877,0.994523,4.334974,4.544728,0.03302,0.668804,5,0.553289496,green,gene20006,TRPL translocation defect protein 14-like
2139,gene20013,0.802144,0.527093,0.010094,0.370156,-0.549222,5.465555,1.478852,0.223954,0.911329,8,0.764020787,turquoise,gene20013,uncharacterized protein LOC111133555
2140,gene20014,0,0,8.270266,19.034286,0.693439,6.70761,5.437597,0.019708,0.572692,10,0.570659795,green,gene20014,protein yippee-like 1
2141,gene2003,0.388736,0.25914,-1.374436,2.908019,-0.20784,6.494968,0.154663,0.694118,0.984124,9,0.590696001,magenta,gene2003,adenosine deaminase-like
2142,gene20032,0.074176,0.082566,-1.682105,37.461562,0.276932,3.685158,0.365722,0.545346,0.969301,4,0.469075175,yellow,gene20032,protein transport protein SFT2-like
2143,gene20048,0.431965,0.275404,5.621461,39.521866,-0.038672,6.227254,0.02218,0.88161,0.993796,9,0.500834267,yellow,gene20048,cyclin-dependent kinase 11B-like
2144,gene20051,0.139896,0.092937,-0.173672,20.646581,0.898768,4.602444,1.317956,0.250959,0.921675,6,0.756585784,turquoise,gene20051,"acyl-CoA synthetase family member 2, mitochondrial-like"
2145,gene20059,0.330883,0.297625,-0.026628,0.519491,0.300825,4.067917,0.306302,0.579958,0.977018,5,0.561769314,green,gene20059,sodium- and chloride-dependent glycine transporter 1-like
2146,gene2006,0,0,2.579776,73.988609,-0.102032,5.230807,0.137632,0.710646,0.985947,7,0.481662662,yellow,gene2006,DNA topoisomerase 2-binding protein 1-like isoform X1
2147,gene20060,0.025343,0.038176,-1.862027,2.001828,-0.855315,4.533245,1.704559,0.191693,0.89842,6,0.347965804,greenyellow,gene20060,uncharacterized protein LOC111137534
2148,gene20062,0.184865,0.194446,-0.205472,0.199297,-0.271257,3.910632,0.117681,0.731563,0.986801,4,0.242721857,red,gene20062,uncharacterized protein LOC111138087
2149,gene20072,0.427791,0.354685,-0.401388,0.261023,-0.69197,3.761196,0.674657,0.411433,0.946349,4,0.094426865,turquoise,gene20072,uncharacterized protein LOC111134258
2150,gene2009,0.016536,0.025358,0.348478,2.372607,0.034274,6.232882,0.008892,0.924871,0.993796,9,0.687660818,yellow,gene2009,glucose-induced degradation protein 8 homolog
2151,gene20092,0.179086,0.189708,0.426023,1.206561,0.045517,4.461545,0.002604,0.959298,0.997272,6,0.733741961,turquoise,gene20092,uncharacterized protein LOC111138048
2152,gene20097,0.144792,0.16132,0.999661,32.652034,-0.330179,3.931172,0.276095,0.599272,0.978657,4,0.484855212,magenta,gene20097,probable RNA polymerase II nuclear localization protein SLC7A6OS
2153,gene20098,0.240985,0.177258,1.432589,24.780588,-1.8475,4.122305,3.317968,0.068526,0.778037,5,0.852158724,turquoise,gene20098,cyclic nucleotide-gated cation channel beta-1-like isoform X1
2154,gene20107,0.310673,0.284396,1.418659,10.939035,-0.510836,5.577288,1.122754,0.289326,0.9304,8,0.309386511,brown,gene20107,copine-3-like
2155,gene20110,0.000131,0.000299,-2.504414,13.472262,0.002793,4.132962,2.10E-05,0.996343,0.999437,5,0.460829257,yellow,gene20110,ankyrin repeat and SOCS box protein 2-like isoform X1
2156,gene20113,0.608127,0.446472,-0.234276,1.161004,0.274737,4.096646,0.352395,0.55276,0.972361,5,0.309854858,greenyellow,gene20113,zinc finger protein 236-like
2157,gene20114,0.196158,0.172113,3.561709,55.016876,0.309222,6.130667,0.759572,0.383462,0.93925,9,0.415603809,turquoise,gene20114,protein tiptop-like isoform X1
2158,gene20115,4.00E-06,1.20E-05,-3.561314,53.682788,-0.05878,5.623985,0.039007,0.843434,0.992241,8,0.621276748,blue,gene20115,zinc finger protein 850-like
2159,gene20116,0,0,-22.956276,68.897679,-0.078259,5.721648,0.049871,0.823288,0.992241,8,0.171513851,blue,gene20116,transmembrane protein 189-like
2160,gene2012,1.50E-05,3.70E-05,-1.446737,68.484009,-0.908251,3.332017,2.280907,0.130975,0.861968,3,-0.048929357,turquoise,gene2012,protein AATF-like isoform X1
2161,gene20121,0.017205,0.02488,5.746683,9.061038,-0.47396,3.764164,0.696159,0.404077,0.944652,4,0.391526213,brown,gene20121,F-box/WD repeat-containing protein 5-like
2162,gene20123,0.156116,0.147251,-0.98726,59.010294,0.152678,4.669401,0.149934,0.698598,0.984987,6,0.056468746,turquoise,gene20123,mediator of RNA polymerase II transcription subunit 13-like
2163,gene20140,0.352435,0.237059,0.87233,1.729393,-0.688153,4.913217,2.291181,0.130111,0.861713,7,0.737710003,red,gene20140,echinoderm microtubule-associated protein-like 1 isoform X3
2164,gene20142,0.00489,0.008245,6.129168,75.349283,-0.327861,4.548779,0.571114,0.449817,0.956091,6,0.296543904,red,gene20142,nucleolar protein 10-like
2165,gene20143,0.119326,0.138733,1.095231,3.896079,-0.107295,4.537115,0.03883,0.843785,0.992241,6,0.807112397,turquoise,gene20143,uncharacterized protein LOC111135373
2166,gene20144,7.30E-05,0.000165,0.219412,56.953932,-0.023487,4.753737,0.000684,0.97914,0.998341,6,0.875140801,turquoise,gene20144,uncharacterize lncRNA
2167,gene20146,0.414735,0.268978,17.895254,8.18874,0.603977,4.451953,1.153502,0.282817,0.928733,6,0.417081028,turquoise,gene20146,"protein MTO1 homolog, mitochondrial-like"
2168,gene2015,0.001833,0.003274,-1.448283,22.516796,-0.248149,5.981077,1.035862,0.308786,0.93226,9,0.356117343,turquoise,gene2015,B-cell lymphoma 6 protein homolog isoform X2
2169,gene20156,0.687664,0.481827,-0.054284,3.204931,0.009472,4.536507,0.000433,0.983398,0.998922,6,0.315943419,red,gene20156,glutamic acid-rich protein-like
2170,gene20162,0.348513,0.270113,-0.553526,5.788809,0.347349,5.582498,0.087029,0.767988,0.987969,8,0.497537818,pink,gene20162,uncharacterized protein LOC111134504 isoform X1
2171,gene20166,0.142986,0.159751,-0.45532,1.825681,-0.03209,5.419209,0.000705,0.978813,0.998341,8,0.2730596,magenta,gene20166,E3 ubiquitin-protein ligase TRIM33-like isoform X1
2172,gene20174,0.095873,0.100027,3.489547,52.332084,0.965231,6.244368,5.204091,0.022534,0.601835,9,0.665469784,pink,gene20174,"phosphatidylinositol 4,5-bisphosphate 3-kinase catalytic subunit delta isoform-like"
2173,gene20175,0,0,-5.813161,4.867082,0.064717,5.141771,0.020773,0.885398,0.993796,7,0.234182041,yellow,gene20175,uncharacterized protein LOC111137433
2174,gene20180,0.053979,0.064256,0.656825,5.400696,0.039016,4.608279,0.006765,0.934449,0.994051,6,0.671040414,turquoise,gene20180,uncharacterized protein LOC111135431 isoform X1
2175,gene20182,0.12253,0.141576,3.589854,72.132256,0.355735,3.481424,0.412457,0.520725,0.965358,3,0.24751476,turquoise,gene20182,RING finger and transmembrane domain-containing protein 1-like
2176,gene20187,0.043303,0.060632,-0.070575,2.836671,-0.180923,6.231718,0.174609,0.676047,0.983547,9,0.776689805,turquoise,gene20187,uncharacterized protein LOC111135083 isoform X1
2177,gene20190,0.049207,0.067524,2.118082,4.82029,0.094325,5.504899,0.061196,0.804616,0.991016,8,0.365575562,turquoise,gene20190,"solute carrier family 2, facilitated glucose transporter member 1-like"
2178,gene20198,0.038871,0.053462,-1.247137,23.270055,-0.116801,7.138607,0.165507,0.684136,0.98412,10,0.777610613,red,gene20198,protein polyglycylase TTLL10-like isoform X2
2179,gene20201,0,0,8.045261,25.190332,-0.61384,3.55904,0.912949,0.339333,0.93226,3,0.367258103,turquoise,gene20201,"tricarboxylate transport protein, mitochondrial-like"
2180,gene20210,0.270388,0.207367,1.468726,18.697355,-0.63769,4.583291,2.226772,0.135637,0.863321,6,0.546330419,brown,gene20210,"39S ribosomal protein L52, mitochondrial-like"
2181,gene20216,0.626155,0.453308,0.094161,0.881577,-0.881753,3.554316,1.238597,0.265742,0.925387,3,0.200437414,red,gene20216,proline-rich transmembrane protein 3-like
2182,gene20221,0.809415,0.530671,0.01632,0.271147,-0.14048,4.052244,0.06419,0.799992,0.990433,5,0.227897352,pink,gene20221,uncharacterized protein LOC111132439
2183,gene20227,6.10E-05,0.000138,-2.136988,22.215045,0.838665,4.078632,1.569577,0.210268,0.905848,5,0.115800636,turquoise,gene20227,leupaxin-like isoform X1
2184,gene20229,0,0,8.088091,38.72914,0.220621,5.175737,0.234435,0.628254,0.980774,7,0.469872074,green,gene20229,ATP-binding cassette sub-family C member 9-like isoform X1
2185,gene20241,0.357663,0.260663,0.880789,7.469682,-0.127405,7.571809,0.238168,0.625532,0.979867,10,0.408450033,green,gene20241,muscle M-line assembly protein unc-89-like isoform X1
2186,gene20264,0.571632,0.426969,-0.081662,0.582756,-0.857155,6.265042,1.01524,0.313651,0.93226,9,0.264056844,turquoise,gene20264,uncharacterized protein LOC111136086
2187,gene20268,0.501891,0.394519,0.769016,2.877741,-0.644794,3.457573,1.59168,0.207086,0.90532,3,0.530051948,blue,gene20268,selenocysteine-specific elongation factor-like isoform X1
2188,gene20274,0.033241,0.048275,-2.550293,2.879595,0.678206,5.539536,4.338888,0.037251,0.693689,8,0.160807112,turquoise,gene20274,pre-mRNA-processing-splicing factor 8
2189,gene20278,0.000312,0.000683,-7.914578,67.20987,-0.373866,6.086979,1.38054,0.240009,0.917696,9,0.761382888,blue,gene20278,coiled-coil domain-containing protein 92-like
2190,gene20284,0.213696,0.213241,0.386647,3.51004,0.00531,6.417907,0.000555,0.981203,0.998583,9,0.762326955,green,gene20284,protein phosphatase 1 regulatory subunit 16A-like isoform X1
2191,gene20297,5.00E-06,1.40E-05,7.761564,25.353456,0.302738,5.759706,0.764593,0.381895,0.93925,8,0.435217878,turquoise,gene20297,"GDP-mannose 4,6 dehydratase-like isoform X1"
2192,gene20299,0,0,-6.611465,4.357279,-0.560424,3.542784,1.256614,0.262293,0.925081,3,0.402630218,blue,gene20299,uncharacterized protein LOC111138519
2193,gene20304,1.30E-05,3.30E-05,-2.545126,84.750694,0.16389,5.437125,0.247419,0.618898,0.978657,8,-0.005714451,turquoise,gene20304,probable aminopeptidase NPEPL1
2194,gene20305,0,0,-7.820017,72.155228,-1.169471,3.457779,5.865231,0.015443,0.537678,3,-0.013360978,turquoise,gene20305,gigaxonin-like
2195,gene20313,0,0,6.45439,2.896485,0.254254,6.140344,1.145913,0.284406,0.928733,9,0.441899073,turquoise,gene20313,ubiquitin carboxyl-terminal hydrolase CYLD-like isoform X1
2196,gene20315,0,0,-9.846346,46.660101,0.160018,5.593604,0.228026,0.632991,0.980774,8,0.346208774,turquoise,gene20315,ranBP-type and C3HC4-type zinc finger-containing protein 1-like isoform X1
2197,gene20320,0.355189,0.312474,1.228406,8.423762,0.422728,5.056412,1.535387,0.215306,0.909234,7,0.259289837,turquoise,gene20320,E3 ubiquitin-protein ligase MARCH6-like
2198,gene20323,0,0,13.007025,55.437372,0.022714,5.347384,0.002459,0.960449,0.997272,8,0.690604575,turquoise,gene20323,TOX high mobility group box family member 4-like isoform X1
2199,gene20329,0.323324,0.292665,-1.003778,5.705381,-0.132645,3.810728,0.04961,0.823743,0.992241,4,0.257007383,blue,gene20329,centrosomal protein of 72 kDa-like
2200,gene20333,0,0,-15.909344,38.684157,-0.155046,5.33543,0.118001,0.731213,0.986801,8,0.191227912,blue,gene20333,CAP-Gly domain-containing linker protein 1-like isoform X5
2201,gene20337,0.984806,0.591637,-0.002074,1.803986,-0.219219,5.124069,0.294232,0.587521,0.97838,7,0.572194136,blue,gene20337,uncharacterized protein LOC111134855 isoform X1
2202,gene20345,0.171171,0.150033,-1.614265,10.08042,0.253885,6.278625,0.593111,0.441219,0.953855,9,0.571650149,pink,gene20345,tripartite motif-containing protein 2-like
2203,gene20352,0.171768,0.152888,-1.970522,46.009188,0.251866,5.960316,0.754787,0.384965,0.93925,9,0.750116583,turquoise,gene20352,protein piccolo-like isoform X7
2204,gene20355,0.476933,0.333488,0.052558,0.289349,-1.552481,4.037496,2.84658,0.091569,0.819745,5,0.321030852,turquoise,gene20355,uncharacterized protein LOC111137487 isoform X1
2205,gene2037,0.196234,0.137361,4.032374,41.394793,0.421274,5.83554,1.613406,0.204014,0.904123,9,0.761623009,green,gene2037,kinesin-like protein KIF13B isoform X1
2206,gene20370,0.415452,0.347665,-0.687718,1.390997,-0.162796,7.685357,0.299364,0.584282,0.977018,10,0.11416092,turquoise,gene20370,transcription elongation factor SPT6-like
2207,gene20377,0,0,9.372308,30.509973,0.014159,4.886164,0.001044,0.97423,0.998341,7,0.300088641,purple,gene20377,CD82 antigen-like
2208,gene2038,0.298305,0.217661,1.040762,3.477776,0.671615,4.802968,0.650916,0.419785,0.949609,7,0.798326055,turquoise,gene2038,uncharacterized protein LOC111125959
2209,gene20382,0,0,3.06524,2.611034,0.242075,6.580476,0.473282,0.491481,0.959914,9,0.490711027,brown,gene20382,uncharacterized protein LOC111132882
2210,gene20383,0.016682,0.026485,0.516552,1.352166,-0.251047,5.444206,0.518437,0.471509,0.956091,8,0.254190768,black,gene20383,uncharacterize lncRNA
2211,gene20384,0.000172,0.000388,-1.506684,1.722632,0.151326,8.184382,0.463695,0.495902,0.960146,10,0.598757845,green,gene20384,uncharacterized protein LOC111135135 isoform X1
2212,gene20396,0,0,-4.680715,49.099322,-1.283397,4.608884,1.107428,0.292642,0.930457,6,0.790686903,turquoise,gene20396,uncharacterized protein LOC111135328 isoform X1
2213,gene20397,0,0,-3.614383,58.10091,-0.54253,4.102711,1.141809,0.28527,0.928733,5,0.555464885,yellow,gene20397,E3 ubiquitin-protein ligase RNF185-like
2214,gene20400,0.110238,0.12098,-0.442578,1.575214,-0.404868,3.296996,0.466257,0.494714,0.960128,3,0.30122692,red,gene20400,uncharacterized protein LOC111135267 isoform X1
2215,gene20413,0,0,5.16512,60.503848,0.019224,4.02875,0.001468,0.969442,0.998341,5,0.278007646,turquoise,gene20413,E3 ubiquitin-protein ligase MIB2-like
2216,gene20415,0.113388,0.113492,14.894436,52.199141,-0.251622,6.405946,0.374524,0.540549,0.969191,9,0.819460863,turquoise,gene20415,segment polarity protein dishevelled homolog DVL-3-like isoform X1
2217,gene20416,0.035715,0.051374,4.335755,75.754218,-0.426924,4.543009,0.904927,0.341464,0.93226,6,0.529758656,red,gene20416,E3 ubiquitin-protein ligase rififylin-like isoform X1
2218,gene20418,0.007804,0.013455,-0.572339,0.389552,0.129331,3.874741,0.044837,0.832304,0.992241,4,0.418416571,yellow,gene20418,phytanoyl-CoA hydroxylase-interacting protein-like isoform X1
2219,gene2042,0.330148,0.234932,-1.366169,68.720888,-0.349001,6.847482,1.185153,0.276309,0.928733,10,0.575692815,brown,gene2042,U1 small nuclear ribonucleoprotein C-like isoform X1
2220,gene20420,0.479428,0.311246,0.123393,0.489119,-0.198509,4.070799,0.039283,0.84289,0.992241,5,0.829706184,turquoise,gene20420,protocadherin-like wing polarity protein stan
2221,gene20428,0.312392,0.234571,-0.899644,1.049922,0.609632,4.212327,0.897599,0.343426,0.93226,5,0.432871848,turquoise,gene20428,"inositol 1,4,5-trisphosphate receptor type 2-like isoform X1"
2222,gene20430,0.036744,0.046963,-2.55036,4.092891,1.563186,4.533388,16.72211,4.30E-05,0.032811,6,0.536692681,pink,gene20430,platelet glycoprotein 4-like isoform X3
2223,gene20431,0.864356,0.549219,-0.00546,0.302163,0.143565,5.085714,0.129871,0.718565,0.98622,7,0.494671853,green,gene20431,FH1/FH2 domain-containing protein 3-like isoform X1
2224,gene20435,1.00E-05,2.50E-05,3.823813,46.013268,-0.385049,7.128026,1.022497,0.311927,0.93226,10,0.446273376,yellow,gene20435,gamma-aminobutyric acid receptor-associated protein-like 2
2225,gene20436,0.340078,0.239458,-2.533755,26.199261,-0.222874,6.87467,1.134543,0.286808,0.928733,10,0.591725431,green,gene20436,serine/threonine-protein kinase PRP4 homolog
2226,gene2044,0,0,4.622036,10.020232,-0.299088,3.913,0.331152,0.564981,0.974934,4,0.10052358,turquoise,gene2044,protein unc-45 homolog B-like
2227,gene20445,0.285958,0.183068,-1.730486,26.147775,0.059099,8.866922,0.050647,0.821941,0.992241,10,0.804518397,purple,gene20445,rootletin-like isoform X1
2228,gene20446,0.014037,0.02272,-2.967734,7.691487,-0.272183,6.017069,0.804693,0.369694,0.937803,9,0.538702042,yellow,gene20446,serine--pyruvate aminotransferase-like
2229,gene20448,0,0,3.315724,42.762939,0.100455,5.986769,0.137611,0.710668,0.985947,9,0.639615532,turquoise,gene20448,rho guanine nucleotide exchange factor 10-like protein isoform X1
2230,gene20451,0,0,-2.562729,7.669167,-0.963737,4.747338,3.875557,0.048994,0.732911,6,0.25167146,turquoise,gene20451,uncharacterized protein LOC111133035
2231,gene20459,0.0059,0.009736,-2.778312,43.721671,-0.062602,6.615931,0.024737,0.875024,0.993796,9,0.875007991,turquoise,gene20459,uncharacterized protein LOC111133354 isoform X1
2232,gene2047,0,0,4.226793,55.34351,0.096825,4.098235,0.042026,0.83757,0.992241,5,0.402661426,red,gene2047,protein disulfide-isomerase A5-like isoform X1
2233,gene20470,0.440114,0.361727,0.257642,0.263469,0.234851,7.074825,0.079446,0.77805,0.988002,10,0.463771754,pink,gene20470,uncharacterized protein LOC111133680
2234,gene20478,0.371982,0.32277,0.037172,0.430041,-0.023014,4.459544,0.003083,0.955719,0.997184,6,0.026286333,turquoise,gene20478,atlastin-2-like isoform X1
2235,gene20483,0.349442,0.309122,0.105655,0.228257,0.092972,3.625172,0.018761,0.891053,0.993796,4,0.234178311,brown,gene20483,uncharacterized protein LOC111138431
2236,gene20488,0.293267,0.219949,0.7108,11.663331,-0.30468,3.951598,0.338104,0.560926,0.974759,4,0.302608524,turquoise,gene20488,T-box transcription factor TBX2-B-like
2237,gene20489,0,0,0.590424,0.679552,-0.556591,4.408795,1.104948,0.293183,0.930465,6,0.178684753,brown,gene20489,T-box transcription factor TBX2-like isoform X1
2238,gene20499,0.039956,0.043493,2.020538,18.620147,-0.281309,7.319972,1.559723,0.211706,0.908002,10,0.745001766,green,gene20499,RNA-binding protein Musashi homolog 2-like isoform X1
2239,gene2050,0.404486,0.299472,0.522427,3.07097,-0.45281,3.750891,0.775543,0.378508,0.939089,4,0.20810614,red,gene2050,"39S ribosomal protein L32, mitochondrial-like"
2240,gene20502,0.001361,0.002623,-0.292295,1.174161,-0.573465,6.082901,2.753444,0.097045,0.825168,9,0.328949577,blue,gene20502,"beta-1,3-galactosyltransferase brn-like isoform X1"
2241,gene20510,0.046487,0.064431,0.166474,0.282713,-0.353623,3.275766,0.365053,0.545713,0.969301,3,0.305039001,brown,gene20510,TBC1 domain family member 20-like
2242,gene20511,0.358255,0.314278,0.662968,0.838419,0.447181,6.057725,0.761428,0.382882,0.93925,9,0.418689906,blue,gene20511,diacylglycerol O-acyltransferase 1-like isoform X1
2243,gene20513,0.529654,0.408891,0.413507,0.257707,-0.647917,5.535918,2.668792,0.102334,0.832368,8,0.439242915,brown,gene20513,prefoldin subunit 4-like
2244,gene2052,0,0,-5.092466,83.156475,-0.323388,3.460509,0.263823,0.607506,0.978657,3,0.250129659,turquoise,gene2052,zinc phosphodiesterase ELAC protein 1-like
2245,gene20527,0.47634,0.3575,0.080513,0.557115,0.046959,5.921742,0.004797,0.944785,0.995857,9,0.38000741,turquoise,gene20527,G-protein coupled receptor 157-like isoform X1
2246,gene20543,0.324621,0.262205,0.45876,2.101401,-0.726122,3.749797,0.877023,0.349018,0.93226,4,0.4309903,turquoise,gene20543,G-protein coupled receptor 157-like
2247,gene20557,0,0,-3.81089,5.559681,-0.33582,7.115033,2.171096,0.140626,0.864426,10,0.117134479,turquoise,gene20557,RNA-binding protein 39-like
2248,gene20558,0.190766,0.164164,3.798923,34.594809,-0.060769,4.243071,0.021991,0.882112,0.993796,5,0.474539196,brown,gene20558,pyruvate dehydrogenase
2249,gene20562,0.207267,0.14565,0.702348,18.896063,0.439294,7.294908,2.521509,0.112303,0.840276,10,0.534840173,green,gene20562,beta-hexosaminidase subunit alpha-like isoform X2
2250,gene20567,0.279477,0.263908,-0.533316,0.845292,0.013854,4.466487,0.000282,0.986606,0.999244,6,0.218931374,turquoise,gene20567,uncharacterized protein LOC111136803 isoform X1
2251,gene20572,0.001187,0.002378,5.090601,14.931606,-1.333373,7.289131,13.177669,0.000283,0.098811,10,0.400129504,blue,gene20572,mitochondrial carrier protein Rim2-like
2252,gene20578,0.812375,0.531892,-0.198413,1.79527,-0.282126,4.061366,0.426497,0.513713,0.964536,5,0.440697365,blue,gene20578,transmembrane protein 185A-like
2253,gene20579,0.180605,0.13185,2.350626,30.869449,-0.282161,8.038657,1.480923,0.22363,0.911329,10,0.66182777,turquoise,gene20579,zinc finger protein 135-like isoform X6
2254,gene2058,0.404504,0.266306,-0.193784,0.411828,0.403648,6.376564,1.064764,0.302131,0.93226,9,0.548900613,turquoise,gene2058,sonic hedgehog protein-like
2255,gene20583,0.287349,0.23643,0.613741,0.928787,-0.272933,5.131126,0.416622,0.518628,0.965262,7,0.069876645,turquoise,gene20583,MDS1 and EVI1 complex locus protein EVI1-like isoform X3
2256,gene206,0,0,-8.970191,30.434759,0.381121,4.333691,0.710971,0.399122,0.944478,5,0.574908417,black,gene206,ADP-ribosylation factor 6
2257,gene2060,0,0,-8.370505,9.783218,-0.737718,4.034019,0.572954,0.449087,0.956091,5,0.377767326,turquoise,gene2060,uncharacterized protein LOC111120143 isoform X1
2258,gene20606,0.663569,0.469229,0.180256,5.541377,-0.057049,5.037531,0.018198,0.892692,0.993796,7,0.706952289,turquoise,gene20606,CAD protein-like isoform X1
2259,gene2061,0.011357,0.017191,-1.203097,2.606741,-1.085818,3.469002,2.774884,0.095754,0.825168,3,0.751874406,turquoise,gene2061,uncharacterized protein LOC111120161 isoform X1
2260,gene20611,0.086553,0.084333,0.562762,8.697966,0.143099,7.350744,0.45418,0.500357,0.960259,10,0.687928983,turquoise,gene20611,beta-adrenergic receptor kinase 2-like isoform X1
2261,gene20615,0,0,0.104834,36.979088,-0.697024,4.452345,0.768893,0.38056,0.939089,6,0.885949036,turquoise,gene20615,small G protein signaling modulator 1-like isoform X1
2262,gene20616,0.266542,0.255164,0.726258,64.217131,-0.117528,4.854364,0.059923,0.806617,0.991016,7,0.680117333,turquoise,gene20616,vacuolar protein sorting-associated protein 33A-like isoform X1
2263,gene20620,0.824926,0.536377,-0.019197,0.380917,-1.336112,3.653977,4.17045,0.041135,0.699822,4,0.125427586,turquoise,gene20620,orexin receptor type 2-like
2264,gene20621,0.590673,0.43831,-0.088351,4.291347,0.054515,4.344532,0.018117,0.892928,0.993796,5,0.599827806,yellow,gene20621,serologically defined colon cancer antigen 3-like
2265,gene20628,0.346359,0.307386,2.156228,23.181546,-0.262023,4.380304,0.319991,0.571613,0.976289,6,0.339124767,turquoise,gene20628,zinc finger protein 436-like
2266,gene20630,1.00E-06,2.00E-06,9.291032,17.862391,0.170061,5.45546,0.057661,0.810231,0.991391,8,0.816496655,turquoise,gene20630,lisH domain and HEAT repeat-containing protein KIAA1468 homolog isoform X1
2267,gene20634,0.005249,0.008784,5.266394,8.722099,0.114192,6.092111,0.089207,0.765188,0.987969,9,0.166756667,turquoise,gene20634,uncharacterized protein LOC111134311 isoform X1
2268,gene20636,0.589227,0.437663,0.042833,0.181755,0.021825,4.201651,0.002047,0.963911,0.99798,5,0.598526106,green,gene20636,cholecystokinin receptor-like
2269,gene20641,0.229047,0.175174,-0.237765,0.536705,-0.672492,4.028598,1.044589,0.306756,0.93226,5,0.388962485,turquoise,gene20641,uncharacterized protein LOC111133394 isoform X1
2270,gene20645,0.441769,0.27881,4.354718,65.780689,0.439745,4.934605,1.010288,0.314834,0.93226,7,0.274489033,turquoise,gene20645,exocyst complex component 8-like isoform X1
2271,gene20650,0.177704,0.175086,0.059839,2.029305,0.485782,6.395675,2.477297,0.115501,0.846854,9,0.756056891,pink,gene20650,switch-associated protein 70-like isoform X1
2272,gene20660,0,0,-3.808304,55.722311,-0.301569,5.293514,0.776113,0.378332,0.939089,8,0.068355177,turquoise,gene20660,uncharacterized protein LOC111135416
2273,gene20667,0,0,25.125584,60.719715,0.184259,5.289256,0.279495,0.597032,0.978657,8,0.314517889,grey,gene20667,solute carrier family 35 member F6-like
2274,gene20676,0.22889,0.179706,2.241428,63.200003,-0.057772,8.30734,0.037156,0.847148,0.992349,10,0.580445261,brown,gene20676,synaptobrevin-like isoform X2
2275,gene20677,0.001738,0.003403,-2.83976,65.343802,-0.431823,3.75793,0.678055,0.410257,0.946141,4,0.410570435,magenta,gene20677,lysophospholipid acyltransferase 5-like
2276,gene20680,0.177477,0.136821,-0.364463,19.898093,-0.172103,5.5146,0.18751,0.664997,0.982944,8,0.773397962,red,gene20680,zinc finger protein castor homolog 1-like isoform X1
2277,gene20686,0.003602,0.006647,0.852034,52.6692,0.015424,6.53456,0.003494,0.952862,0.997184,9,0.340139752,yellow,gene20686,caspase-6-like isoform X1
2278,gene20692,0,0,9.000618,34.473588,0.109543,3.760886,0.049418,0.82408,0.992241,4,0.310738303,turquoise,gene20692,serine/threonine-protein kinase Chk2-like
2279,gene20700,0.225564,0.183988,0.34926,11.173806,0.210476,5.14163,0.483326,0.48692,0.959339,7,0.586374016,green,gene20700,eukaryotic translation initiation factor 4E transporter-like isoform X1
2280,gene20702,0.000133,0.000304,-7.220917,31.897628,0.476597,5.157179,1.011735,0.314487,0.93226,7,0.544984909,brown,gene20702,GTP-binding protein 128up
2281,gene20714,8.00E-06,2.10E-05,8.871261,43.453202,-0.168365,8.936679,0.746431,0.387608,0.940016,10,0.747358778,green,gene20714,chromodomain-helicase-DNA-binding protein Mi-2 homolog isoform X1
2282,gene20719,0.283123,0.204766,0.98838,41.606298,0.25624,6.203409,0.751483,0.386007,0.939683,9,0.752469535,purple,gene20719,uncharacterized protein LOC111134265 isoform X1
2283,gene20724,0.000483,0.001028,-0.102818,0.357448,-1.962635,6.032477,2.386569,0.122382,0.854029,9,0.066586865,turquoise,gene20724,complement C1q-like protein 2
2284,gene20725,0.063278,0.066159,5.234116,13.250984,0.250708,4.987308,0.26055,0.609743,0.978657,7,0.207415614,turquoise,gene20725,3-methyl-2-oxobutanoate dehydrogenase
2285,gene20728,0.111793,0.106074,-0.965321,3.708584,0.195346,4.337216,0.17605,0.67479,0.983547,5,-0.014653882,turquoise,gene20728,uncharacterized protein LOC111134348
2286,gene20730,1.60E-05,4.00E-05,-5.059195,52.981599,0.344817,4.692929,0.80379,0.369963,0.937803,6,0.614475449,yellow,gene20730,galactoside 2-alpha-L-fucosyltransferase 2-like isoform X1
2287,gene20732,0.012712,0.020797,-1.577063,2.696876,0.302429,5.243892,0.487994,0.484823,0.959251,7,0.275493294,turquoise,gene20732,cysteine and histidine-rich protein 1-like
2288,gene20733,0.009162,0.015543,2.093627,11.890433,-0.102836,6.5403,0.068997,0.792803,0.989528,9,0.762009321,turquoise,gene20733,piezo-type mechanosensitive ion channel component 1-like isoform X1
2289,gene20734,0.145409,0.146739,4.987348,22.072503,0.65605,6.942421,4.329038,0.037467,0.693689,10,0.853438648,turquoise,gene20734,uncharacterized protein LOC111137051
2290,gene20735,0.010576,0.014974,-8.087831,35.455688,0.106601,9.817593,0.182048,0.669619,0.983547,10,0.850517639,green,gene20735,msx2-interacting protein-like isoform X1
2291,gene2074,0,0,-21.103417,68.50023,-0.431588,6.110456,1.423142,0.232887,0.916332,9,0.201618578,blue,gene2074,uncharacterized protein LOC111135430
2292,gene20740,0,0,3.890161,87.744199,-0.645831,6.514808,4.45466,0.034806,0.685829,9,0.637021988,blue,gene20740,protein unc-119 homolog B-like
2293,gene20742,7.00E-04,0.001451,2.364607,5.140975,0.193329,6.732003,0.45599,0.499504,0.960259,10,0.737780233,pink,gene20742,syntaxin-like isoform X1
2294,gene20746,0.243762,0.147254,3.711316,35.923561,0.278393,5.169339,0.285872,0.592878,0.978657,7,0.888339362,turquoise,gene20746,uncharacterized protein LOC111136315 isoform X1
2295,gene20749,0.334463,0.271383,2.639556,22.187067,1.049394,3.639883,3.953158,0.046783,0.721924,4,0.630501798,green,gene20749,adenylate cyclase type 2-like
2296,gene2075,0.420022,0.335917,-0.034132,0.228531,-0.081768,6.879096,0.067372,0.795202,0.989963,10,0.170865101,turquoise,gene2075,rootletin-like
2297,gene20752,0.314834,0.239389,-0.037161,0.50588,-1.065206,3.829398,3.176672,0.074697,0.787597,4,0.157680716,turquoise,gene20752,GTP-binding protein GEM-like
2298,gene20758,0.101785,0.121369,0.387238,0.850763,-0.013338,5.486851,0.001214,0.9722,0.998341,8,0.23447611,turquoise,gene20758,uncharacterized protein LOC111138138
2299,gene2076,0.417194,0.346466,0.694933,4.024396,-0.517587,3.674213,0.7421,0.388989,0.940408,4,0.164104543,turquoise,gene2076,carbohydrate sulfotransferase 15-like isoform X1
2300,gene20763,0.000123,0.000282,3.098343,53.898894,0.251262,5.472255,0.255585,0.61317,0.978657,8,0.181510543,turquoise,gene20763,E3 ubiquitin-protein ligase MIB2-like
2301,gene20765,0.169615,0.181997,1.877877,56.657996,0.08035,6.207366,0.044187,0.833507,0.992241,9,0.651286558,turquoise,gene20765,unconventional myosin-Ic-like isoform X1
2302,gene20767,0,0,10.539343,31.773249,-0.134176,6.706794,0.280403,0.596437,0.978657,10,0.193513821,blue,gene20767,SPRY domain-containing SOCS box protein 1-like
2303,gene20768,1.00E-06,4.00E-06,7.698354,9.406316,0.164677,4.308174,0.064424,0.799636,0.990433,5,0.56662604,green,gene20768,DNA ligase 3-like
2304,gene20780,0.025026,0.035384,-0.039991,0.82226,0.54996,4.637893,1.128728,0.288047,0.928733,6,0.191843088,turquoise,gene20780,uncharacterized protein LOC111134729
2305,gene20783,0.010077,0.016936,8.730069,31.125466,-0.271675,5.351125,0.530985,0.466193,0.956091,8,0.636131426,brown,gene20783,protein RER1-like
2306,gene20785,0.078605,0.099287,2.342935,55.473984,-0.300877,5.268589,0.928374,0.335286,0.93226,8,0.3715284,brown,gene20785,pre-mRNA 3\' end processing protein WDR33-like
2307,gene2079,0.100596,0.121024,0.339517,0.858946,-0.328065,4.374731,0.181016,0.670502,0.983547,6,0.799734418,red,gene2079,hemK methyltransferase family member 2-like isoform X2
2308,gene20794,0.100637,0.112669,-3.456043,29.387194,0.264575,5.601461,0.298885,0.584582,0.977236,8,0.824464364,turquoise,gene20794,ATP-dependent RNA helicase DDX1-like
2309,gene20797,0.443053,0.303351,-1.878852,18.853906,-0.328564,6.788787,1.589579,0.207386,0.90532,10,0.571176599,yellow,gene20797,heterogeneous nuclear ribonucleoprotein C-like 3 isoform X2
2310,gene20801,0.115936,0.115402,5.106783,19.635899,0.360335,5.516341,0.626838,0.428517,0.951656,8,0.861876161,turquoise,gene20801,solute carrier family 12 member 4-like isoform X1
2311,gene20810,0.415077,0.276765,0.344211,0.85626,0.495202,4.748815,0.654717,0.418431,0.949526,6,0.526035111,turquoise,gene20810,uncharacterized protein LOC111136768
2312,gene20811,0.714044,0.493088,0.333314,37.703342,0.505833,4.139619,0.259188,0.610678,0.978657,5,0.293156386,turquoise,gene20811,"uncharacterized protein LOC111132511, partial"
2313,gene20814,0.187368,0.144444,4.486922,23.934767,-0.311192,6.581608,0.732247,0.392156,0.941104,9,0.800918378,red,gene20814,kinesin-like protein KIF28P isoform X1
2314,gene20819,0.463214,0.374603,0.759852,8.766562,-0.219456,8.571685,0.91462,0.338892,0.93226,10,0.622305005,green,gene20819,apoptotic chromatin condensation inducer in the nucleus-like
2315,gene20820,0.000202,0.000452,4.717143,32.072655,0.293789,4.606107,0.480431,0.488227,0.959339,6,0.368026719,blue,gene20820,VPS9 domain-containing protein 1-like
2316,gene20821,0.238147,0.19071,-3.498634,29.154057,-0.749466,7.65454,4.75023,0.029294,0.648676,10,0.287094914,brown,gene20821,putative peptidyl-prolyl cis-trans isomerase
2317,gene20824,0.296308,0.233221,1.341142,7.815664,0.301184,5.193708,0.508682,0.47571,0.95729,7,0.768211271,turquoise,gene20824,protein naked cuticle homolog 2-like isoform X1
2318,gene20831,0,0,3.963893,85.160002,-0.073899,6.312627,0.086698,0.768418,0.987969,9,0.40254851,blue,gene20831,non-canonical poly(A) RNA polymerase PAPD5-like isoform X1
2319,gene20845,0,0,-1.032192,1.097284,1.094488,4.443661,4.086258,0.043233,0.707867,6,0.219650631,black,gene20845,cytochrome P450 2C14-like
2320,gene20846,0.003243,0.005694,0.24366,2.573218,-0.350292,4.116971,0.329019,0.566237,0.975073,5,0.46525708,pink,gene20846,cytochrome P450 2C14-like
2321,gene20849,0,0,10.557397,23.693846,-0.718843,5.376573,5.935544,0.014838,0.537678,8,0.13235998,turquoise,gene20849,mitochondrial import inner membrane translocase subunit TIM14-like
2322,gene20851,0.010775,0.017978,-2.279767,72.532964,-0.372424,6.487299,2.176124,0.140167,0.86433,9,0.30048283,red,gene20851,rho guanine nucleotide exchange factor 7-like isoform X1
2323,gene20852,0.097411,0.118037,-1.92472,51.437214,0.240179,6.121262,0.815719,0.366435,0.936651,9,0.300600973,blue,gene20852,DNA polymerase delta subunit 3-like
2324,gene20856,0.915883,0.568672,0.054172,1.202666,0.002506,6.149476,5.00E-05,0.994369,0.999244,9,0.393119432,yellow,gene20856,S-formylglutathione hydrolase-like
2325,gene20860,0,0,4.406215,40.047665,-0.180823,6.527774,0.358548,0.549314,0.970421,9,0.795763265,blue,gene20860,intraflagellar transport protein 80 homolog isoform X1
2326,gene20874,0.000104,0.000241,3.215381,70.853933,-0.523334,3.813156,1.098536,0.294588,0.931337,4,0.287998327,green,gene20874,heat shock 70 kDa protein 13-like
2327,gene20879,0,1.00E-06,-2.406333,12.959041,0.117525,4.764612,0.056816,0.811601,0.991698,6,0.515551535,turquoise,gene20879,"cGMP-specific 3\',5\'-cyclic phosphodiesterase-like isoform X1"
2328,gene20881,0,0,-1.814897,0.454787,-0.370676,5.192215,0.13848,0.709796,0.985648,7,0.585398382,turquoise,gene20881,dopamine receptor 2-like
2329,gene20883,0.062465,0.075278,3.81461,11.20733,-0.130253,9.544986,0.369794,0.543116,0.969301,10,0.731660302,green,gene20883,nucleolysin TIAR-like
2330,gene20895,0.071543,0.072665,-7.145136,19.437279,0.015726,6.164425,0.001421,0.969927,0.998341,9,0.686256849,turquoise,gene20895,Na(+)/H(+) exchanger beta-like
2331,gene20896,0,0,-4.818424,24.285711,0.110627,6.332053,0.168561,0.681394,0.983916,9,0.354038907,turquoise,gene20896,monocarboxylate transporter 12-like isoform X1
2332,gene20901,0.354227,0.31182,0.071019,0.47153,0.536142,4.510277,2.085495,0.148704,0.876049,6,0.156392317,turquoise,gene20901,uncharacterized protein LOC111134497 isoform X1
2333,gene20903,0.25,0.149043,-8.292427,6.224371,-0.061173,5.284848,0.013639,0.907029,0.993796,8,0.612724166,red,gene20903,probable phospholipid-transporting ATPase IH isoform X4
2334,gene20906,0.032833,0.03563,8.083173,27.933452,-0.109104,5.495565,0.127586,0.720948,0.98622,8,0.160033845,turquoise,gene20906,probable phospholipid-transporting ATPase IF isoform X1
2335,gene20915,0.03508,0.045435,5.402268,55.573126,-0.013918,5.156045,0.001241,0.971904,0.998341,7,0.610416092,turquoise,gene20915,cilia- and flagella-associated protein 46-like isoform X1
2336,gene20917,0,0,6.79044,7.005669,-0.161922,3.562358,0.116267,0.733119,0.986959,3,0.229489307,blue,gene20917,uncharacterized protein LOC111134881
2337,gene20919,0,0,-9.317342,5.343609,0.219642,4.025013,0.135263,0.713036,0.98622,5,0.611944161,turquoise,gene20919,dual oxidase maturation factor 1-like isoform X1
2338,gene20920,0.000171,0.000385,-1.227071,1.136492,0.639216,4.37636,2.040395,0.15317,0.878894,6,0.31912205,blue,gene20920,root phototropism protein 2-like
2339,gene20922,0.19468,0.202357,-0.601476,0.611432,0.148209,4.655909,0.020134,0.887163,0.993796,6,0.859704021,turquoise,gene20922,uncharacterized protein LOC111137328
2340,gene20925,0.534859,0.388493,-0.134859,2.136017,-0.437151,3.389339,0.377367,0.539016,0.96884,3,0.130960673,turquoise,gene20925,monocarboxylate transporter 14-like isoform X1
2341,gene20928,0,0,14.349258,57.670186,-0.662045,3.446622,1.349665,0.245337,0.920884,3,0.333006009,blue,gene20928,uncharacterized protein C20orf194-like
2342,gene20935,0.085224,0.091368,0.528306,31.196331,-0.326923,5.895398,1.017281,0.313165,0.93226,9,0.235059262,red,gene20935,alpha-centractin
2343,gene20942,0.080146,0.100831,0.140456,0.775374,0.546579,3.749981,0.853814,0.355476,0.93226,4,0.139445108,black,gene20942,uncharacterized protein LOC111136384 isoform X1
2344,gene20953,0,0,-10.203393,25.55145,0.267478,4.437467,0.565072,0.452224,0.956091,6,0.452245588,blue,gene20953,deleted in autism protein 1 homolog isoform X1
2345,gene20964,0.253113,0.245891,-1.327528,9.455264,-0.04376,6.63074,0.011349,0.915162,0.993796,9,0.567401392,turquoise,gene20964,uncharacterized protein LOC111133171
[truncated: 610,063 more chars]
